# Supplementary material for: A Systematic Framework for Drug Repositioning from Integrated Omics and Drug Phenotype Profiles Using Pathway-Drug Network
Source: Biomed Res Int. 2016 Dec 26;2016:7147039. doi: 10.1155/2016/7147039 (PMC5233404; doi:10.1155/2016/7147039)
Supplement: Supplementary file 2 [file 7147039.f2.txt]

# ES :  Enrichment Score					
# NES : Normalized Enrichment Score					
# NOM pvalue : Nominal p-value					
# FDR : False Discovery Rate					
# FWER : Familywise-error Rate					
# For detail explanation of each scores refer to http://software.broadinstitute.org/gsea/doc/GSEAUserGuideFrame.html					
NAME	ES	NES	NOM p-val	FDR q-val	FWER p-val
BIOCARTA_IL2_PATHWAY	-0.7541099	-2.0082185	0	0.015592807	0.034
BIOCARTA_EPO_PATHWAY	-0.76209646	-2.0472972	0	0.015595529	0.016
KEGG_INSULIN_SIGNALING_PATHWAY	-0.49835655	-1.789617	0.003992016	0.046946745	0.432
KEGG_GLYCEROLIPID_METABOLISM	-0.69063383	-1.7998046	0.001945525	0.04775815	0.393
BIOCARTA_ARENRF2_PATHWAY	-0.82385904	-1.7911881	0.001937985	0.048519533	0.424
KEGG_ARACHIDONIC_ACID_METABOLISM	-0.67935705	-1.7939272	0	0.049352743	0.416
REACTOME_FATTY_ACID_TRIACYLGLYCEROL_AND_KETONE_BODY_METABOLISM	-0.5699053	-1.7485096	0.015904572	0.049563613	0.559
KEGG_DRUG_METABOLISM_CYTOCHROME_P450	-0.611677	-1.8121498	0.003838772	0.049788684	0.351
BIOCARTA_NGF_PATHWAY	-0.70836234	-1.7558055	0.004175365	0.049938984	0.537
REACTOME_PHOSPHOLIPASE_C_MEDIATED_CASCADE	-0.5202217	-1.7519424	0.001984127	0.050587658	0.545
REACTOME_PLC_BETA_MEDIATED_EVENTS	-0.5903507	-1.8000787	0	0.050738208	0.392
BIOCARTA_EGFR_SMRTE_PATHWAY	-0.66689914	-1.7578821	0.008016032	0.050748844	0.533
BIOCARTA_INTEGRIN_PATHWAY	-0.58974504	-1.7793405	0.005859375	0.050867673	0.47
REACTOME_CA_DEPENDENT_EVENTS	-0.66997397	-1.8053747	0.001976285	0.050976627	0.377
BIOCARTA_KERATINOCYTE_PATHWAY	-0.51273715	-1.7486937	0.003976143	0.051122993	0.558
REACTOME_TRANSCRIPTIONAL_REGULATION_OF_WHITE_ADIPOCYTE_DIFFERENTIATION	-0.75370884	-1.7423221	0.004048583	0.051500402	0.572
BIOCARTA_IL6_PATHWAY	-0.8077471	-1.8155034	0	0.051972624	0.342
BIOCARTA_INSULIN_PATHWAY	-0.7120757	-1.7704678	0	0.052024666	0.497
BIOCARTA_MET_PATHWAY	-0.593888	-1.7667601	0.006048387	0.052075528	0.511
BIOCARTA_IL3_PATHWAY	-0.7169935	-1.7586759	0.002004008	0.05223038	0.533
BIOCARTA_AT1R_PATHWAY	-0.511806	-1.7739024	0.007920792	0.05225203	0.488
BIOCARTA_PYK2_PATHWAY	-0.5066257	-1.7615156	0.00742115	0.052970283	0.524
KEGG_RETINOL_METABOLISM	-0.676868	-1.7364943	0.001960784	0.053198103	0.588
KEGG_GLYCINE_SERINE_AND_THREONINE_METABOLISM	-0.72069144	-1.8156486	0.003868472	0.056697406	0.342
REACTOME_CRMPS_IN_SEMA3A_SIGNALING	-0.68751776	-1.7241007	0.005964215	0.05792189	0.632
KEGG_TYPE_II_DIABETES_MELLITUS	-0.6036293	-1.8276584	0	0.058418356	0.308
KEGG_TYROSINE_METABOLISM	-0.62775403	-1.7250706	0.007619048	0.05917418	0.631
REACTOME_CREB_PHOSPHORYLATION_THROUGH_THE_ACTIVATION_OF_RAS	-0.567555	-1.8185346	0.003752345	0.05998184	0.333
BIOCARTA_ACE2_PATHWAY	-0.70187575	-1.7138764	0.009920635	0.0622344	0.656
REACTOME_SEMA3A_PLEXIN_REPULSION_SIGNALING_BY_INHIBITING_INTEGRIN_ADHESION	-0.6540039	-1.7162043	0.001988072	0.062241793	0.65
REACTOME_ADP_SIGNALLING_THROUGH_P2RY1	-0.5845056	-1.7004557	0.01	0.06233177	0.689
KEGG_JAK_STAT_SIGNALING_PATHWAY	-0.46217605	-1.7028393	0.006012024	0.06355105	0.684
BIOCARTA_GLEEVEC_PATHWAY	-0.62213033	-1.6940672	0.003929273	0.06364474	0.701
REACTOME_PPARA_ACTIVATES_GENE_EXPRESSION	-0.49912784	-1.7006339	0.006085193	0.06373193	0.689
REACTOME_G_ALPHA_S_SIGNALLING_EVENTS	-0.49866372	-1.6950647	0.001996008	0.06424678	0.695
REACTOME_DAG_AND_IP3_SIGNALING	-0.6341412	-1.8295698	0.001972387	0.06453539	0.305
REACTOME_POST_NMDA_RECEPTOR_ACTIVATION_EVENTS	-0.5107311	-1.702968	0.003846154	0.06506978	0.684
REACTOME_NOREPINEPHRINE_NEUROTRANSMITTER_RELEASE_CYCLE	-0.7617927	-1.7076899	0.005736138	0.06520772	0.675
BIOCARTA_CDMAC_PATHWAY	-0.68772346	-1.704863	0.011627907	0.06532419	0.681
REACTOME_CGMP_EFFECTS	-0.66211534	-1.6855812	0.005825243	0.06680751	0.717
KEGG_STEROID_HORMONE_BIOSYNTHESIS	-0.70254254	-1.6877213	0	0.06697418	0.715
REACTOME_INHIBITION_OF_INSULIN_SECRETION_BY_ADRENALINE_NORADRENALINE	-0.7086532	-1.8365858	0.005836576	0.06719604	0.282
KEGG_METABOLISM_OF_XENOBIOTICS_BY_CYTOCHROME_P450	-0.7183869	-1.6761211	0.004040404	0.06984629	0.747
REACTOME_GROWTH_HORMONE_RECEPTOR_SIGNALING	-0.60130733	-1.6767575	0.013565891	0.07074388	0.745
BIOCARTA_GPCR_PATHWAY	-0.68004245	-1.6772069	0.013671875	0.07187275	0.744
BIOCARTA_SPRY_PATHWAY	-0.6379167	-1.85422	0.004081633	0.07240731	0.237
REACTOME_ACTIVATED_AMPK_STIMULATES_FATTY_ACID_OXIDATION_IN_MUSCLE	-0.7589097	-1.6556662	0.005758158	0.07263115	0.788
REACTOME_SIGNALING_BY_NOTCH1	0.54063654	1.7343248	0.005660377	0.07273996	0.557
BIOCARTA_PDGF_PATHWAY	-0.5652513	-1.6498923	0.007858546	0.07349883	0.805
BIOCARTA_TPO_PATHWAY	-0.62807196	-1.6557236	0.010204081	0.073826134	0.788
REACTOME_ACTIVATION_OF_THE_AP1_FAMILY_OF_TRANSCRIPTION_FACTORS	-0.75613546	-1.652459	0.005964215	0.07398344	0.795
KEGG_ADIPOCYTOKINE_SIGNALING_PATHWAY	-0.7216932	-1.8404442	0	0.07425179	0.276
REACTOME_OPIOID_SIGNALLING	-0.50630236	-1.6588079	0.003952569	0.07425198	0.783
KEGG_HISTIDINE_METABOLISM	-0.6482636	-1.6658243	0.012	0.07434828	0.767
BIOCARTA_EGF_PATHWAY	-0.5683319	-1.6499234	0.009861933	0.07467861	0.805
BIOCARTA_LEPTIN_PATHWAY	-0.8074879	-1.6563095	0.001919386	0.074704036	0.788
BIOCARTA_IGF1_PATHWAY	-0.70895517	-1.6688616	0.008230452	0.07494598	0.766
REACTOME_NITRIC_OXIDE_STIMULATES_GUANYLATE_CYCLASE	-0.59923536	-1.666653	0.00967118	0.07512947	0.767
REACTOME_PROSTANOID_LIGAND_RECEPTORS	-0.7081738	-1.661453	0.00407332	0.075142056	0.779
BIOCARTA_MITOCHONDRIA_PATHWAY	0.67410433	1.7351109	0	0.07520907	0.555
REACTOME_SIGNAL_AMPLIFICATION	-0.5728526	-1.6594144	0.012121212	0.07522875	0.781
BIOCARTA_CHEMICAL_PATHWAY	0.58120924	1.7150004	0.011764706	0.07590997	0.621
BIOCARTA_CBL_PATHWAY	-0.59711564	-1.6621993	0.010330578	0.07603248	0.778
BIOCARTA_DEATH_PATHWAY	0.5563672	1.7077471	0.003921569	0.0766583	0.645
BIOCARTA_CASPASE_PATHWAY	0.6875851	1.7107891	0.001988072	0.07679112	0.633
REACTOME_METABOLISM_OF_NON_CODING_RNA	0.69769585	1.7367159	0	0.0771996	0.55
REACTOME_DNA_STRAND_ELONGATION	0.61526257	1.726578	0.01192843	0.07742346	0.59
REACTOME_FANCONI_ANEMIA_PATHWAY	0.674241	1.7393402	0.004008016	0.078077056	0.532
REACTOME_TRANSPORT_OF_RIBONUCLEOPROTEINS_INTO_THE_HOST_NUCLEUS	0.6844824	1.7429286	0	0.0781746	0.515
BIOCARTA_G2_PATHWAY	0.61458635	1.7155192	0.001934236	0.07822637	0.619
KEGG_NON_HOMOLOGOUS_END_JOINING	0.68931776	1.7472947	0.001897533	0.078236565	0.499
REACTOME_MRNA_SPLICING	0.651388	1.6995027	0.007633588	0.07977248	0.668
KEGG_CELL_CYCLE	0.53367364	1.7016329	0.007936508	0.0799365	0.662
KEGG_RIBOFLAVIN_METABOLISM	0.67070806	1.7199888	0.009652509	0.0802583	0.605
REACTOME_G0_AND_EARLY_G1	0.65286195	1.7159567	0.003968254	0.081080206	0.617
REACTOME_AMINO_ACID_AND_OLIGOPEPTIDE_SLC_TRANSPORTERS	0.5205957	1.7473943	0.001919386	0.08309046	0.499
REACTOME_ANTIVIRAL_MECHANISM_BY_IFN_STIMULATED_GENES	0.651931	1.6920565	0.001988072	0.08552287	0.7
REACTOME_EXTENSION_OF_TELOMERES	0.5700893	1.6870327	0.007952286	0.087478854	0.715
KEGG_SPLICEOSOME	0.65508544	1.7477185	0.003883495	0.08824111	0.497
REACTOME_ACTIVATION_OF_CHAPERONES_BY_ATF6_ALPHA	0.7084291	1.7525592	0.003968254	0.08892596	0.485
REACTOME_CELL_EXTRACELLULAR_MATRIX_INTERACTIONS	-0.833064	-1.6296425	0	0.08929521	0.839
REACTOME_PHASE1_FUNCTIONALIZATION_OF_COMPOUNDS	-0.6524453	-1.8550959	0	0.089446194	0.236
REACTOME_PROCESSING_OF_CAPPED_INTRON_CONTAINING_PRE_MRNA	0.65632963	1.7567714	0.003846154	0.09109936	0.48
REACTOME_REGULATION_OF_GLUCOKINASE_BY_GLUCOKINASE_REGULATORY_PROTEIN	0.6343723	1.6722143	0.01178782	0.09357146	0.745
REACTOME_PROCESSING_OF_CAPPED_INTRONLESS_PRE_MRNA	0.7153893	1.6696533	0.004008016	0.09383373	0.747
KEGG_BASE_EXCISION_REPAIR	0.6123342	1.6758267	0.015968064	0.09450317	0.742
REACTOME_TRANSPORT_OF_MATURE_MRNA_DERIVED_FROM_AN_INTRONLESS_TRANSCRIPT	0.62387496	1.6730222	0.005859375	0.09491807	0.744
REACTOME_MITOTIC_PROMETAPHASE	0.59220356	1.6606774	0.003883495	0.09513416	0.769
BIOCARTA_RB_PATHWAY	0.6467572	1.664196	0.019493178	0.09570547	0.761
KEGG_UBIQUITIN_MEDIATED_PROTEOLYSIS	0.504284	1.6655912	0.007827789	0.096056	0.758
REACTOME_PLATELET_HOMEOSTASIS	-0.4408298	-1.6207196	0.011764706	0.09661678	0.852
REACTOME_SIGNALING_BY_NOTCH	0.46992683	1.6763893	0.007677543	0.09671397	0.741
KEGG_PYRIMIDINE_METABOLISM	0.4869837	1.6428579	0.003968254	0.09671783	0.8
BIOCARTA_SRCRPTP_PATHWAY	0.750144	1.7580545	0.008097166	0.09702276	0.474
REACTOME_TRANSCRIPTION	0.4592283	1.6376305	0.005725191	0.0971119	0.809
REACTOME_MEIOTIC_SYNAPSIS	0.533339	1.6608893	0.008048289	0.09721658	0.769
REACTOME_TELOMERE_MAINTENANCE	0.5098595	1.6440213	0.016064256	0.097457305	0.799
REACTOME_RNA_POL_II_TRANSCRIPTION	0.53009194	1.6551353	0.011650485	0.097578675	0.777
REACTOME_LAGGING_STRAND_SYNTHESIS	0.59053034	1.656738	0.01369863	0.097704135	0.773
REACTOME_INTERACTIONS_OF_VPR_WITH_HOST_CELLULAR_PROTEINS	0.669442	1.6381569	0.005791506	0.098432094	0.809
REACTOME_AMINO_ACID_TRANSPORT_ACROSS_THE_PLASMA_MEMBRANE	0.63638914	1.804895	0.003883495	0.098455615	0.317
REACTOME_GLUCOSE_TRANSPORT	0.53642863	1.644888	0.01764706	0.09853312	0.798
REACTOME_NEP_NS2_INTERACTS_WITH_THE_CELLULAR_EXPORT_MACHINERY	0.72119856	1.6484222	0.005780347	0.09877548	0.789
BIOCARTA_G1_PATHWAY	0.52886647	1.6390512	0.021400778	0.09916579	0.809
REACTOME_APOPTOSIS_INDUCED_DNA_FRAGMENTATION	0.7386361	1.6319295	0.003921569	0.09940228	0.822
REACTOME_ACTIVATION_OF_THE_PRE_REPLICATIVE_COMPLEX	0.5631067	1.6331404	0.015209125	0.09992046	0.82
REACTOME_HIV_LIFE_CYCLE	0.54241765	1.6450732	0.011472276	0.10043836	0.798
REACTOME_ACTIVATION_OF_CHAPERONE_GENES_BY_ATF6_ALPHA	0.72172993	1.6484596	0.01775148	0.100836135	0.789
REACTOME_DNA_REPAIR	0.49014586	1.6501613	0.013435701	0.10119666	0.784
REACTOME_APC_CDC20_MEDIATED_DEGRADATION_OF_NEK2A	0.75317556	1.6282886	0.003937008	0.10130009	0.827
REACTOME_CLEAVAGE_OF_GROWING_TRANSCRIPT_IN_THE_TERMINATION_REGION_	0.6795489	1.7919356	0.003875969	0.10172989	0.356
REACTOME_EARLY_PHASE_OF_HIV_LIFE_CYCLE	0.7172674	1.6169802	0.015717093	0.10222248	0.848
KEGG_DNA_REPLICATION	0.57917583	1.7598543	0.003944773	0.10289743	0.464
REACTOME_BASE_EXCISION_REPAIR	0.62790424	1.6178285	0.014	0.10306312	0.848
BIOCARTA_MEF2D_PATHWAY	0.587247	1.6230984	0.031067962	0.10341145	0.839
KEGG_SELENOAMINO_ACID_METABOLISM	0.63844407	1.8476229	0	0.103687294	0.207
BIOCARTA_PITX2_PATHWAY	0.5778195	1.6139265	0.034816246	0.10376435	0.854
KEGG_PURINE_METABOLISM	0.41262782	1.6184916	0.001949318	0.10390848	0.846
REACTOME_CELL_CYCLE	0.51857394	1.6238265	0.003937008	0.10444426	0.838
KEGG_BLADDER_CANCER	0.5311854	1.6191444	0.011811024	0.10472232	0.846
REACTOME_PHOSPHORYLATION_OF_THE_APC_C	0.6825588	1.6197692	0.021072797	0.1057335	0.845
REACTOME_INTERFERON_SIGNALING	0.5530905	1.608791	0.013779528	0.105922	0.857
REACTOME_INHIBITION_OF_THE_PROTEOLYTIC_ACTIVITY_OF_APC_C_REQUIRED_FOR_THE_ONSET_OF_ANAPHASE_BY_MITOTIC_SPINDLE_CHECKPOINT_COMPONENTS	0.73779756	1.6101185	0.011764706	0.10608326	0.857
REACTOME_TRANSPORT_OF_MATURE_TRANSCRIPT_TO_CYTOPLASM	0.63212943	1.7792977	0.003802281	0.106488764	0.396
REACTOME_GLYCEROPHOSPHOLIPID_BIOSYNTHESIS	-0.49217364	-1.6075871	0.025590552	0.10807692	0.868
REACTOME_MRNA_PROCESSING	0.6353922	1.7627846	0.003861004	0.10835451	0.455
BIOCARTA_NTHI_PATHWAY	-0.5481789	-1.6056514	0.036809817	0.10836244	0.868
BIOCARTA_GH_PATHWAY	-0.66545284	-1.8616266	0	0.10888756	0.222
REACTOME_CHROMOSOME_MAINTENANCE	0.5347188	1.767835	0	0.11042822	0.435
REACTOME_RECEPTOR_LIGAND_BINDING_INITIATES_THE_SECOND_PROTEOLYTIC_CLEAVAGE_OF_NOTCH_RECEPTOR	0.7715826	1.5955378	0.011257036	0.1113991	0.869
REACTOME_APC_C_CDC20_MEDIATED_DEGRADATION_OF_CYCLIN_B	0.7053899	1.5981055	0.022900764	0.111431845	0.867
REACTOME_SIGNALING_BY_NOTCH4	0.7033677	1.5966675	0.013358778	0.111472026	0.868
REACTOME_DNA_REPLICATION	0.6033609	1.6014044	0.009746589	0.11226356	0.866
REACTOME_TRAFFICKING_OF_AMPA_RECEPTORS	0.5293329	1.5987788	0.018218623	0.112288766	0.866
REACTOME_INTRINSIC_PATHWAY_FOR_APOPTOSIS	0.5678847	1.5995972	0.00984252	0.11263992	0.866
REACTOME_ACTIVATED_NOTCH1_TRANSMITS_SIGNAL_TO_THE_NUCLEUS	0.6975771	1.807756	0	0.1129033	0.309
KEGG_BUTANOATE_METABOLISM	-0.67998976	-1.5984312	0.014227643	0.11315151	0.876
REACTOME_DEPOSITION_OF_NEW_CENPA_CONTAINING_NUCLEOSOMES_AT_THE_CENTROMERE	0.5609499	1.5912114	0.016096579	0.11348164	0.874
REACTOME_RESOLUTION_OF_AP_SITES_VIA_THE_MULTIPLE_NUCLEOTIDE_PATCH_REPLACEMENT_PATHWAY	0.6479699	1.5887669	0.025948104	0.11350767	0.877
REACTOME_SYNTHESIS_OF_PA	-0.5957137	-1.5932679	0.028455285	0.11376376	0.882
REACTOME_DOWNREGULATION_OF_SMAD2_3_SMAD4_TRANSCRIPTIONAL_ACTIVITY	0.5946025	1.5894051	0.027237354	0.11409747	0.877
REACTOME_SIGNALING_BY_NOTCH3	0.7333088	1.5914823	0.009615385	0.11461806	0.874
REACTOME_VEGF_LIGAND_RECEPTOR_INTERACTIONS	-0.71156734	-1.5986357	0.022357723	0.114676856	0.876
REACTOME_REGULATION_OF_GENE_EXPRESSION_IN_BETA_CELLS	-0.56069744	-1.5937834	0.021442495	0.11474071	0.881
KEGG_PPAR_SIGNALING_PATHWAY	-0.7606751	-1.594687	0.007889546	0.11561911	0.88
REACTOME_MRNA_3_END_PROCESSING	0.6045658	1.8211144	0.005714286	0.116289966	0.272
BIOCARTA_MCM_PATHWAY	0.66075104	1.5793841	0.01734104	0.11884289	0.889
KEGG_LYSINE_DEGRADATION	-0.6061411	-1.5874554	0.024291499	0.11892883	0.893
REACTOME_SIGNALING_BY_NOTCH2	0.7156278	1.5795808	0.014981274	0.12005652	0.889
REACTOME_CELL_CYCLE_MITOTIC	0.52882904	1.5766425	0.015594542	0.12096375	0.889
REACTOME_NOD1_2_SIGNALING_PATHWAY	0.48175502	1.5797874	0.019493178	0.12131758	0.889
REACTOME_HS_GAG_BIOSYNTHESIS	0.52608913	1.5810851	0.005952381	0.12141669	0.887
REACTOME_REPAIR_SYNTHESIS_FOR_GAP_FILLING_BY_DNA_POL_IN_TC_NER	0.6055231	1.5644643	0.032882012	0.12264457	0.903
BIOCARTA_WNT_PATHWAY	0.5618155	1.573763	0.030245747	0.12273814	0.89
KEGG_MISMATCH_REPAIR	0.55742997	1.565774	0.041015625	0.12372753	0.901
REACTOME_MITOTIC_M_M_G1_PHASES	0.5972224	1.5645598	0.017475728	0.12385505	0.903
KEGG_NOTCH_SIGNALING_PATHWAY	0.4681862	1.5666924	0.027079303	0.1238648	0.896
KEGG_RNA_DEGRADATION	0.5461573	1.5625206	0.023346303	0.12396515	0.905
REACTOME_LATE_PHASE_OF_HIV_LIFE_CYCLE	0.5154425	1.5681212	0.038240917	0.12509446	0.894
REACTOME_LATENT_INFECTION_OF_HOMO_SAPIENS_WITH_MYCOBACTERIUM_TUBERCULOSIS	0.56868285	1.566789	0.018072288	0.12516312	0.896
REACTOME_CALNEXIN_CALRETICULIN_CYCLE	0.58266294	1.56897	0.017077798	0.12562308	0.894
REACTOME_PROCESSIVE_SYNTHESIS_ON_THE_LAGGING_STRAND	0.5950712	1.570169	0.030181086	0.12566319	0.893
REACTOME_PURINE_RIBONUCLEOSIDE_MONOPHOSPHATE_BIOSYNTHESIS	0.78045255	1.5577953	0.019762846	0.12834208	0.909
BIOCARTA_FCER1_PATHWAY	-0.48841086	-1.5773023	0.027079303	0.12948398	0.906
BIOCARTA_TOLL_PATHWAY	-0.5072556	-1.5676731	0.024761904	0.13084102	0.915
REACTOME_NUCLEOTIDE_BINDING_DOMAIN_LEUCINE_RICH_REPEAT_CONTAINING_RECEPTOR_NLR_SIGNALING_PATHWAYS	0.46456802	1.554446	0.013333334	0.13125864	0.916
REACTOME_SIGNALLING_TO_P38_VIA_RIT_AND_RIN	0.5857467	1.5532367	0.01372549	0.13139434	0.919
REACTOME_E2F_ENABLED_INHIBITION_OF_PRE_REPLICATION_COMPLEX_FORMATION	0.73609924	1.5507826	0.029013539	0.13158645	0.919
REACTOME_LIPID_DIGESTION_MOBILIZATION_AND_TRANSPORT	-0.66505796	-1.5684457	0.007984032	0.13173132	0.913
REACTOME_METABOLISM_OF_LIPIDS_AND_LIPOPROTEINS	-0.43207514	-1.5655891	0.027833002	0.13213249	0.916
REACTOME_MRNA_SPLICING_MINOR_PATHWAY	0.64600855	1.5491123	0.036821704	0.13221124	0.92
KEGG_P53_SIGNALING_PATHWAY	0.47356904	1.551196	0.030245747	0.13246816	0.919
BIOCARTA_AHSP_PATHWAY	-0.83386856	-1.5686861	0	0.13309185	0.913
REACTOME_SLC_MEDIATED_TRANSMEMBRANE_TRANSPORT	0.38688982	1.5468396	0.013182675	0.13355926	0.92
REACTOME_DEADENYLATION_OF_MRNA	0.66713256	1.5449123	0.018939395	0.13458782	0.923
KEGG_TRYPTOPHAN_METABOLISM	-0.69119716	-1.5689672	0.027613413	0.13463324	0.913
REACTOME_UNFOLDED_PROTEIN_RESPONSE	0.47673333	1.5437124	0.031835206	0.13480642	0.924
REACTOME_ACTIVATION_OF_ATR_IN_RESPONSE_TO_REPLICATION_STRESS	0.6337675	1.8553581	0	0.13495052	0.183
REACTOME_G_PROTEIN_ACTIVATION	-0.57697755	-1.5697175	0.033464566	0.13546328	0.911
BIOCARTA_BCR_PATHWAY	-0.47014275	-1.5701896	0.019607844	0.13670257	0.91
REACTOME_TRAF6_MEDIATED_IRF7_ACTIVATION_IN_TLR7_8_OR_9_SIGNALING	0.6261345	1.5408041	0.047808766	0.1371415	0.924
BIOCARTA_LECTIN_PATHWAY	-0.7533198	-1.557399	0.028225806	0.14081222	0.927
BIOCARTA_CARDIACEGF_PATHWAY	-0.6786646	-1.5554562	0.041237112	0.14184773	0.929
BIOCARTA_CREB_PATHWAY	-0.58014834	-1.5529166	0.025742574	0.14363354	0.935
REACTOME_GLUCAGON_SIGNALING_IN_METABOLIC_REGULATION	-0.6306694	-1.549523	0.024048096	0.14468077	0.936
KEGG_VALINE_LEUCINE_AND_ISOLEUCINE_DEGRADATION	-0.68620515	-1.549934	0.03373016	0.14583918	0.935
REACTOME_AQUAPORIN_MEDIATED_TRANSPORT	-0.5196965	-1.5469768	0.025490196	0.14635254	0.936
REACTOME_HDL_MEDIATED_LIPID_TRANSPORT	-0.5582854	-1.544139	0.05068226	0.14835949	0.939
REACTOME_PD1_SIGNALING	0.64514816	1.5156556	0.054325957	0.15171802	0.94
KEGG_CELL_ADHESION_MOLECULES_CAMS	0.4293774	1.5157406	0.034351144	0.1529013	0.94
REACTOME_PROLACTIN_RECEPTOR_SIGNALING	-0.6388934	-1.5396563	0.023346303	0.15302557	0.939
REACTOME_BRANCHED_CHAIN_AMINO_ACID_CATABOLISM	-0.6872421	-1.5380714	0.023904383	0.15356855	0.939
REACTOME_CYCLIN_A_B1_ASSOCIATED_EVENTS_DURING_G2_M_TRANSITION	0.6363673	1.516154	0.08366534	0.15373306	0.94
KEGG_RNA_POLYMERASE	0.57768613	1.5178618	0.02952756	0.15409364	0.939
KEGG_EPITHELIAL_CELL_SIGNALING_IN_HELICOBACTER_PYLORI_INFECTION	0.408184	1.5168668	0.041509435	0.15411249	0.939
REACTOME_BIOLOGICAL_OXIDATIONS	-0.4502403	-1.536368	0.025948104	0.15414563	0.941
REACTOME_ASSOCIATION_OF_TRIC_CCT_WITH_TARGET_PROTEINS_DURING_BIOSYNTHESIS	0.7675753	1.5200263	0.013232514	0.15414989	0.939
REACTOME_PACKAGING_OF_TELOMERE_ENDS	0.5308183	1.5127014	0.042944785	0.15434104	0.942
REACTOME_METABOLISM_OF_PORPHYRINS	-0.63916576	-1.5310396	0.0331384	0.15455773	0.942
REACTOME_CELL_CYCLE_CHECKPOINTS	0.6300752	1.5185466	0.031434186	0.15461244	0.939
BIOCARTA_ATRBRCA_PATHWAY	0.487186	1.5205352	0.066793896	0.1548667	0.939
REACTOME_DEVELOPMENTAL_BIOLOGY	-0.39588657	-1.5291581	0.032128513	0.15540054	0.942
REACTOME_THROMBOXANE_SIGNALLING_THROUGH_TP_RECEPTOR	-0.5364109	-1.534224	0.029821074	0.1554891	0.942
REACTOME_NUCLEAR_SIGNALING_BY_ERBB4	-0.47130784	-1.5313103	0.04901961	0.155781	0.942
REACTOME_BASE_FREE_SUGAR_PHOSPHATE_REMOVAL_VIA_THE_SINGLE_NUCLEOTIDE_REPLACEMENT_PATHWAY	0.60905176	1.5206637	0.050607286	0.15604725	0.938
KEGG_NEUROACTIVE_LIGAND_RECEPTOR_INTERACTION	-0.43042976	-1.5323251	0.027290449	0.15623689	0.942
REACTOME_REGULATORY_RNA_PATHWAYS	0.68980765	1.5097771	0.021153847	0.15699211	0.942
REACTOME_POL_SWITCHING	0.6075255	1.5250945	0.031189084	0.15722866	0.935
REACTOME_P38MAPK_EVENTS	0.5470052	1.5208435	0.037037037	0.1572289	0.938
REACTOME_G_ALPHA_Z_SIGNALLING_EVENTS	-0.48843977	-1.5222796	0.033464566	0.15754019	0.946
REACTOME_E2F_MEDIATED_REGULATION_OF_DNA_REPLICATION	0.5790929	1.5221076	0.045454547	0.15834144	0.937
REACTOME_PYRIMIDINE_CATABOLISM	-0.72639537	-1.5258571	0.034351144	0.15853679	0.942
REACTOME_TIE2_SIGNALING	-0.5539123	-1.5201982	0.052208837	0.15855598	0.946
REACTOME_G2_M_DNA_DAMAGE_CHECKPOINT	0.76008743	1.5209193	0.02385686	0.15861203	0.938
REACTOME_TRAFFICKING_OF_GLUR2_CONTAINING_AMPA_RECEPTORS	0.6060965	1.5064744	0.035856575	0.15866058	0.944
REACTOME_LIPOPROTEIN_METABOLISM	-0.5696054	-1.5188082	0.029469548	0.15870744	0.946
REACTOME_RESOLUTION_OF_AP_SITES_VIA_THE_SINGLE_NUCLEOTIDE_REPLACEMENT_PATHWAY	0.57451916	1.5228014	0.03941909	0.15893699	0.936
KEGG_FATTY_ACID_METABOLISM	-0.78288287	-1.5235058	0.016161617	0.15898481	0.945
REACTOME_P2Y_RECEPTORS	-0.710419	-1.5223523	0.03815261	0.15905382	0.945
KEGG_AMINOACYL_TRNA_BIOSYNTHESIS	0.6160617	1.5070475	0.05357143	0.15915465	0.944
BIOCARTA_NFAT_PATHWAY	-0.45823762	-1.5156654	0.046	0.15979071	0.947
REACTOME_MITOCHONDRIAL_FATTY_ACID_BETA_OXIDATION	-0.8452562	-1.5239769	0.017578125	0.15992066	0.945
REACTOME_EICOSANOID_LIGAND_BINDING_RECEPTORS	-0.55402476	-1.5107982	0.042145595	0.16044365	0.949
BIOCARTA_HSP27_PATHWAY	0.629395	1.5013652	0.035928145	0.16053191	0.948
KEGG_GLYCOLYSIS_GLUCONEOGENESIS	-0.62379974	-1.5158519	0.022044089	0.16107829	0.947
KEGG_O_GLYCAN_BIOSYNTHESIS	0.6226325	1.5016991	0.025641026	0.1612913	0.948
REACTOME_NRIF_SIGNALS_CELL_DEATH_FROM_THE_NUCLEUS	0.57416445	1.4997658	0.05668016	0.16135271	0.95
KEGG_PHENYLALANINE_METABOLISM	-0.6287834	-1.5110791	0.038610037	0.16158457	0.948
REACTOME_RAF_MAP_KINASE_CASCADE	0.6709432	1.5032104	0.035714287	0.16175422	0.946
KEGG_ANTIGEN_PROCESSING_AND_PRESENTATION	0.5169139	1.5017959	0.06706114	0.16242823	0.947
BIOCARTA_LONGEVITY_PATHWAY	-0.77197474	-1.5112579	0.01996008	0.16290757	0.948
REACTOME_INTEGRATION_OF_ENERGY_METABOLISM	-0.47958815	-1.5120941	0.04208417	0.16337001	0.948
BIOCARTA_FAS_PATHWAY	0.44016612	1.4957024	0.046692606	0.16578391	0.95
KEGG_CYTOKINE_CYTOKINE_RECEPTOR_INTERACTION	-0.40716204	-1.5047618	0.034068137	0.16592903	0.953
BIOCARTA_BIOPEPTIDES_PATHWAY	-0.41131994	-1.5054245	0.0331384	0.16651577	0.953
BIOCARTA_PPARA_PATHWAY	-0.62550366	-1.5021638	0.044624746	0.16785973	0.955
REACTOME_METAL_ION_SLC_TRANSPORTERS	0.6937975	1.492402	0.033707865	0.16891438	0.952
REACTOME_TETRAHYDROBIOPTERIN_BH4_SYNTHESIS_RECYCLING_SALVAGE_AND_REGULATION	0.7269034	1.4878455	0.023121387	0.17132907	0.955
KEGG_ENDOCYTOSIS	0.39611974	1.4897482	0.03646833	0.17146872	0.954
REACTOME_INTEGRATION_OF_PROVIRUS	0.7523549	1.4883244	0.025291828	0.17215572	0.955
REACTOME_G2_M_CHECKPOINTS	0.65609056	1.8819358	0.001968504	0.17611751	0.126
KEGG_OOCYTE_MEIOSIS	0.43204427	1.478204	0.07020873	0.17640698	0.96
REACTOME_MEIOSIS	0.42121416	1.4798828	0.03976143	0.17647217	0.958
REACTOME_PHOSPHORYLATION_OF_CD3_AND_TCR_ZETA_CHAINS	0.7276612	1.4816511	0.08008213	0.17678332	0.958
REACTOME_RNA_POL_I_TRANSCRIPTION	0.48479256	1.4824314	0.027833002	0.17693336	0.958
REACTOME_METABOLISM_OF_RNA	0.69208133	1.4834716	0.052427184	0.17693722	0.958
REACTOME_N_GLYCAN_TRIMMING_IN_THE_ER_AND_CALNEXIN_CALRETICULIN_CYCLE	0.5201869	1.4801036	0.054580897	0.17744151	0.958
BIOCARTA_DNAFRAGMENT_PATHWAY	0.8157641	1.4782279	0.02357564	0.17767787	0.96
REACTOME_REGULATION_OF_WATER_BALANCE_BY_RENAL_AQUAPORINS	-0.53796774	-1.4941523	0.03777336	0.17781425	0.958
REACTOME_TRNA_AMINOACYLATION	0.598296	1.4761138	0.074074075	0.17826445	0.962
REACTOME_PURINE_SALVAGE	0.6078138	1.4729766	0.06896552	0.18127513	0.964
BIOCARTA_P35ALZHEIMERS_PATHWAY	0.6532186	1.4706374	0.05078125	0.18168223	0.964
REACTOME_REMOVAL_OF_THE_FLAP_INTERMEDIATE_FROM_THE_C_STRAND	0.6812414	1.4706544	0.0503876	0.18296516	0.964
REACTOME_SLBP_DEPENDENT_PROCESSING_OF_REPLICATION_DEPENDENT_HISTONE_PRE_MRNAS	0.8469767	1.4681394	0.01968504	0.18432514	0.966
REACTOME_GENERATION_OF_SECOND_MESSENGER_MOLECULES	0.5349798	1.462735	0.073267326	0.18463317	0.967
REACTOME_GLUCAGON_TYPE_LIGAND_RECEPTORS	-0.47551954	-1.4873569	0.025742574	0.18466991	0.966
REACTOME_CREATION_OF_C4_AND_C2_ACTIVATORS	-0.7686753	-1.4818593	0.054474708	0.18475056	0.968
REACTOME_ACTIVATION_OF_CHAPERONE_GENES_BY_XBP1S	0.45898026	1.4631021	0.08506616	0.18539913	0.967
REACTOME_NEUROTRANSMITTER_RELEASE_CYCLE	-0.44744888	-1.4823976	0.050301813	0.18558902	0.968
KEGG_HOMOLOGOUS_RECOMBINATION	0.45368072	1.4612015	0.05513308	0.18564183	0.968
KEGG_COMPLEMENT_AND_COAGULATION_CASCADES	-0.54891884	-1.4876493	0.041420117	0.18583402	0.966
REACTOME_METABOLISM_OF_PROTEINS	0.59433275	1.4659122	0.06090373	0.18632838	0.967
REACTOME_COMPLEMENT_CASCADE	-0.67975235	-1.4839377	0.053465348	0.18637367	0.967
BIOCARTA_HIVNEF_PATHWAY	0.4033449	1.4632744	0.038986355	0.1864117	0.967
BIOCARTA_DREAM_PATHWAY	-0.7790972	-1.4827498	0.025793651	0.18664798	0.968
REACTOME_UNWINDING_OF_DNA	0.6655557	1.4637308	0.09784736	0.18706858	0.967
REACTOME_MICRORNA_MIRNA_BIOGENESIS	0.6972148	1.4641553	0.030360531	0.1877159	0.967
BIOCARTA_RANKL_PATHWAY	-0.5518799	-1.4840237	0.051282052	0.18788113	0.967
BIOCARTA_TEL_PATHWAY	0.6093043	1.458288	0.02952756	0.18869676	0.968
REACTOME_COPI_MEDIATED_TRANSPORT	0.6941179	1.4570419	0.046332046	0.18916234	0.969
KEGG_N_GLYCAN_BIOSYNTHESIS	0.5260641	1.451834	0.045544554	0.19143751	0.97
BIOCARTA_P53HYPOXIA_PATHWAY	0.54838544	1.4534916	0.046332046	0.19151726	0.97
REACTOME_BINDING_AND_ENTRY_OF_HIV_VIRION	0.92865497	1.4525692	0.001968504	0.19178912	0.97
REACTOME_INSULIN_RECEPTOR_RECYCLING	0.5525616	1.4535469	0.05462185	0.19270171	0.97
REACTOME_GAMMA_CARBOXYLATION_TRANSPORT_AND_AMINO_TERMINAL_CLEAVAGE_OF_PROTEINS	-0.64893883	-1.4734541	0.05263158	0.19348328	0.97
BIOCARTA_NOS1_PATHWAY	-0.58699524	-1.4741408	0.06374502	0.19411221	0.97
REACTOME_SYNTHESIS_OF_DNA	0.61948746	1.4483424	0.07509881	0.19528659	0.97
REACTOME_HIV_INFECTION	0.5653948	1.447443	0.08267716	0.19552222	0.97
REACTOME_S_PHASE	0.58941483	1.4422548	0.092519686	0.19794193	0.971
REACTOME_G1_S_SPECIFIC_TRANSCRIPTION	0.61683404	1.441033	0.08349901	0.1985756	0.971
KEGG_NOD_LIKE_RECEPTOR_SIGNALING_PATHWAY	0.4189087	1.4424073	0.036190476	0.19882798	0.971
REACTOME_NOTCH1_INTRACELLULAR_DOMAIN_REGULATES_TRANSCRIPTION	0.4865147	1.4441276	0.05078125	0.19889536	0.97
REACTOME_SYNTHESIS_SECRETION_AND_INACTIVATION_OF_GIP	0.6847573	1.4427732	0.052532833	0.19949132	0.971
REACTOME_PROSTACYCLIN_SIGNALLING_THROUGH_PROSTACYCLIN_RECEPTOR	-0.58622915	-1.4674852	0.05905512	0.19950084	0.973
BIOCARTA_D4GDI_PATHWAY	0.6141596	1.4377905	0.086538464	0.199813	0.973
BIOCARTA_FEEDER_PATHWAY	-0.70819384	-1.4682869	0.0627451	0.19991632	0.973
REACTOME_REGULATION_OF_MITOTIC_CELL_CYCLE	0.6687328	1.4383827	0.06732673	0.20012407	0.973
BIOCARTA_ERYTH_PATHWAY	-0.5796005	-1.4505447	0.08949416	0.20026685	0.977
REACTOME_INFLUENZA_LIFE_CYCLE	0.7537646	1.4390162	0.07450981	0.20029788	0.973
REACTOME_GLUCOSE_METABOLISM	-0.59962946	-1.4493123	0.057539683	0.20057772	0.98
REACTOME_RECRUITMENT_OF_NUMA_TO_MITOTIC_CENTROSOMES	0.683149	1.4354994	0.09355509	0.2007059	0.974
KEGG_RENIN_ANGIOTENSIN_SYSTEM	-0.5560021	-1.4634056	0.08183633	0.20078623	0.976
REACTOME_REGULATED_PROTEOLYSIS_OF_P75NTR	0.5810012	1.436176	0.097087376	0.20090969	0.974
KEGG_PYRUVATE_METABOLISM	-0.7370121	-1.4653692	0.033472802	0.20106025	0.973
REACTOME_TRIGLYCERIDE_BIOSYNTHESIS	-0.6335729	-1.4506426	0.067729086	0.20160669	0.977
BIOCARTA_IL1R_PATHWAY	-0.43226388	-1.4636284	0.078998074	0.20206709	0.976
BIOCARTA_SHH_PATHWAY	-0.62351257	-1.452848	0.05697446	0.20254126	0.976
KEGG_CITRATE_CYCLE_TCA_CYCLE	-0.6931158	-1.4469119	0.054435484	0.20268512	0.98
REACTOME_PTM_GAMMA_CARBOXYLATION_HYPUSINE_FORMATION_AND_ARYLSULFATASE_ACTIVATION	-0.5414261	-1.4507184	0.06311637	0.20294756	0.977
REACTOME_DCC_MEDIATED_ATTRACTIVE_SIGNALING	-0.53606445	-1.4513115	0.07399577	0.20347223	0.977
REACTOME_ION_CHANNEL_TRANSPORT	0.41384822	1.4320569	0.051233396	0.20361893	0.975
BIOCARTA_PLCE_PATHWAY	-0.71494186	-1.4530438	0.043392505	0.20376687	0.976
BIOCARTA_SET_PATHWAY	0.70980924	1.432465	0.05168986	0.20422313	0.975
REACTOME_BILE_SALT_AND_ORGANIC_ANION_SLC_TRANSPORTERS	-0.659233	-1.4567163	0.059183672	0.20453696	0.976
BIOCARTA_MCALPAIN_PATHWAY	-0.5083563	-1.4534885	0.050485436	0.20468399	0.976
REACTOME_REGULATION_OF_IFNA_SIGNALING	-0.49396536	-1.4583644	0.10978044	0.20506057	0.976
BIOCARTA_IGF1R_PATHWAY	-0.612749	-1.45408	0.052208837	0.2052279	0.976
REACTOME_G_BETA_GAMMA_SIGNALLING_THROUGH_PI3KGAMMA	-0.54553974	-1.457034	0.08123791	0.20558022	0.976
REACTOME_ACYL_CHAIN_REMODELLING_OF_PS	-0.67555094	-1.454756	0.078313254	0.20577201	0.976
BIOCARTA_AGR_PATHWAY	-0.4128444	-1.4440268	0.07867495	0.20583661	0.981
BIOCARTA_TCR_PATHWAY	-0.4368854	-1.4428127	0.05905512	0.20632994	0.981
BIOCARTA_NO1_PATHWAY	-0.6029742	-1.4583727	0.06378601	0.20667523	0.976
REACTOME_RNA_POL_I_RNA_POL_III_AND_MITOCHONDRIAL_TRANSCRIPTION	0.41313142	1.4284148	0.045009784	0.20795818	0.977
REACTOME_MITOTIC_G1_G1_S_PHASES	0.5511215	1.4259273	0.09746589	0.20933285	0.978
BIOCARTA_EPONFKB_PATHWAY	0.5893453	1.4265609	0.072407044	0.20950069	0.977
REACTOME_G1_S_TRANSITION	0.5957355	1.4246768	0.092337914	0.21009663	0.978
KEGG_MTOR_SIGNALING_PATHWAY	0.4144847	1.4115543	0.08730159	0.21110384	0.981
REACTOME_DEGRADATION_OF_THE_EXTRACELLULAR_MATRIX	0.55302364	1.4147741	0.08097166	0.21193707	0.978
REACTOME_RORA_ACTIVATES_CIRCADIAN_EXPRESSION	0.3847853	1.411728	0.09074074	0.21200195	0.981
REACTOME_ENDOSOMAL_SORTING_COMPLEX_REQUIRED_FOR_TRANSPORT_ESCRT	0.6454687	1.4186444	0.08576998	0.21201387	0.978
KEGG_STEROID_BIOSYNTHESIS	0.64925003	1.4094167	0.07101727	0.21204525	0.981
REACTOME_RNA_POL_I_TRANSCRIPTION_INITIATION	0.5476242	1.4077934	0.06706114	0.212122	0.982
REACTOME_PKA_MEDIATED_PHOSPHORYLATION_OF_CREB	-0.6445774	-1.4380494	0.059760958	0.21227996	0.982
REACTOME_O_LINKED_GLYCOSYLATION_OF_MUCINS	0.45669413	1.4067205	0.063097514	0.21240431	0.982
BIOCARTA_CALCINEURIN_PATHWAY	0.5230968	1.4129922	0.085388996	0.21241094	0.981
REACTOME_METABOLISM_OF_MRNA	0.6883453	1.4083008	0.1003937	0.21242255	0.981
REACTOME_TRANSPORT_OF_INORGANIC_CATIONS_ANIONS_AND_AMINO_ACIDS_OLIGOPEPTIDES	0.3739653	1.4121368	0.06896552	0.2124928	0.981
REACTOME_HOST_INTERACTIONS_OF_HIV_FACTORS	0.6210859	1.4058273	0.11023622	0.21264865	0.985
REACTOME_TRANSCRIPTION_COUPLED_NER_TC_NER	0.4912318	1.4135355	0.084645666	0.21269825	0.979
REACTOME_APOPTOTIC_CLEAVAGE_OF_CELL_ADHESION_PROTEINS	0.7777356	1.4149352	0.042226486	0.21286589	0.978
REACTOME_ION_TRANSPORT_BY_P_TYPE_ATPASES	0.47727102	1.4188137	0.04725898	0.21292768	0.978
REACTOME_ACYL_CHAIN_REMODELLING_OF_PE	-0.58528286	-1.4366083	0.09072978	0.21308318	0.983
REACTOME_CELL_CELL_JUNCTION_ORGANIZATION	0.40452364	1.4094222	0.058601134	0.21315192	0.981
REACTOME_MITOCHONDRIAL_TRNA_AMINOACYLATION	0.5997505	1.4159528	0.10261569	0.21359353	0.978
REACTOME_APOBEC3G_MEDIATED_RESISTANCE_TO_HIV1_INFECTION	0.7543802	1.4190397	0.06374502	0.21375068	0.978
KEGG_VIBRIO_CHOLERAE_INFECTION	0.5038386	1.4150721	0.08747515	0.2138235	0.978
REACTOME_AMINE_LIGAND_BINDING_RECEPTORS	-0.45771548	-1.4351217	0.10763209	0.21405602	0.983
BIOCARTA_P27_PATHWAY	0.66493124	1.4162922	0.0804829	0.21434744	0.978
REACTOME_M_G1_TRANSITION	0.61759883	1.4201918	0.08039216	0.21445438	0.978
REACTOME_CHOLESTEROL_BIOSYNTHESIS	0.7195656	1.4191486	0.06500956	0.21483289	0.978
REACTOME_DEADENYLATION_DEPENDENT_MRNA_DECAY	0.52455765	1.4207036	0.07954545	0.21487689	0.978
BIOCARTA_GRANULOCYTES_PATHWAY	-0.53683573	-1.4269334	0.09126214	0.21684603	0.983
REACTOME_ADP_SIGNALLING_THROUGH_P2RY12	-0.6039965	-1.4313948	0.10650887	0.21707197	0.983
REACTOME_G_BETA_GAMMA_SIGNALLING_THROUGH_PLC_BETA	-0.53697515	-1.427419	0.08267716	0.21745214	0.983
KEGG_BETA_ALANINE_METABOLISM	-0.7070847	-1.431867	0.07272727	0.21763663	0.983
BIOCARTA_COMP_PATHWAY	-0.7525567	-1.4277977	0.07465619	0.21836217	0.983
KEGG_TAURINE_AND_HYPOTAURINE_METABOLISM	-0.6981238	-1.4281642	0.068136275	0.21918093	0.983
REACTOME_REGULATION_OF_BETA_CELL_DEVELOPMENT	-0.44885883	-1.4242623	0.05645161	0.21941198	0.983
KEGG_PROPANOATE_METABOLISM	-0.784058	-1.4286056	0.03846154	0.21985814	0.983
REACTOME_ASSOCIATION_OF_LICENSING_FACTORS_WITH_THE_PRE_REPLICATIVE_COMPLEX	0.5688665	1.4002	0.08023483	0.21997057	0.986
REACTOME_BASIGIN_INTERACTIONS	0.53787804	1.3990492	0.058091287	0.22051346	0.986
REACTOME_DOWNSTREAM_SIGNALING_OF_ACTIVATED_FGFR	-0.37564984	-1.4223977	0.057613168	0.22093518	0.983
REACTOME_DOWNSTREAM_SIGNAL_TRANSDUCTION	-0.38890922	-1.4164611	0.064257026	0.2239982	0.984
REACTOME_ACYL_CHAIN_REMODELLING_OF_PI	-0.6479957	-1.4194609	0.06122449	0.22400004	0.984
REACTOME_FORMATION_OF_FIBRIN_CLOT_CLOTTING_CASCADE	-0.5577619	-1.4170747	0.062626265	0.22456571	0.984
REACTOME_NUCLEOTIDE_EXCISION_REPAIR	0.4653134	1.3947673	0.092156865	0.22470744	0.986
BIOCARTA_EPHA4_PATHWAY	-0.57638645	-1.4148194	0.09375	0.2251614	0.984
REACTOME_REGULATION_OF_THE_FANCONI_ANEMIA_PATHWAY	0.7521984	1.394905	0.096339114	0.2256357	0.986
REACTOME_INTRINSIC_PATHWAY	-0.58115655	-1.4135731	0.08383234	0.22568853	0.984
KEGG_BIOSYNTHESIS_OF_UNSATURATED_FATTY_ACIDS	-0.56575626	-1.4171562	0.08867925	0.2258262	0.984
REACTOME_VITAMIN_B5_PANTOTHENATE_METABOLISM	0.6218782	1.3910102	0.09615385	0.22788668	0.988
BIOCARTA_PS1_PATHWAY	0.52432984	1.3913057	0.10646388	0.22854766	0.988
BIOCARTA_ETS_PATHWAY	-0.5516716	-1.4107307	0.09861933	0.22908172	0.984
REACTOME_ETHANOL_OXIDATION	-0.94749063	-1.4086103	0.003929273	0.23077373	0.984
REACTOME_ASPARAGINE_N_LINKED_GLYCOSYLATION	0.4536158	1.3869789	0.09496124	0.23246303	0.989
BIOCARTA_NUCLEARRS_PATHWAY	-0.57238543	-1.40611	0.1042471	0.23342174	0.985
BIOCARTA_IL10_PATHWAY	-0.55314815	-1.4031835	0.111561865	0.23504181	0.985
BIOCARTA_CACAM_PATHWAY	-0.563263	-1.4036642	0.112676054	0.23574	0.985
KEGG_STARCH_AND_SUCROSE_METABOLISM	-0.5927785	-1.4001964	0.07157464	0.23826864	0.985
BIOCARTA_SALMONELLA_PATHWAY	0.6780602	1.3811681	0.093812376	0.23891327	0.989
REACTOME_POST_TRANSLATIONAL_PROTEIN_MODIFICATION	0.36798695	1.3794911	0.065891474	0.23895276	0.989
REACTOME_ACTIVATION_OF_BH3_ONLY_PROTEINS	0.5518048	1.3817798	0.10344828	0.23910895	0.989
REACTOME_SRP_DEPENDENT_COTRANSLATIONAL_PROTEIN_TARGETING_TO_MEMBRANE	0.800181	1.3799361	0.0877193	0.23942113	0.989
REACTOME_ZINC_TRANSPORTERS	0.73799926	1.3732618	0.073076926	0.23954025	0.989
REACTOME_NONSENSE_MEDIATED_DECAY_ENHANCED_BY_THE_EXON_JUNCTION_COMPLEX	0.76967293	1.3733507	0.12007874	0.24049948	0.989
KEGG_GLYCOSPHINGOLIPID_BIOSYNTHESIS_GLOBO_SERIES	0.52779996	1.3754368	0.08349146	0.24071097	0.989
REACTOME_SIGNALLING_TO_RAS	0.42783558	1.3745061	0.09325397	0.24100019	0.989
REACTOME_SHC1_EVENTS_IN_ERBB4_SIGNALING	0.47404563	1.3734876	0.11394892	0.24138632	0.989
REACTOME_CELL_SURFACE_INTERACTIONS_AT_THE_VASCULAR_WALL	0.43071097	1.3754805	0.061657034	0.24180138	0.989
REACTOME_RNA_POL_III_TRANSCRIPTION_INITIATION_FROM_TYPE_2_PROMOTER	0.44721085	1.3758433	0.11434109	0.24235472	0.989
BIOCARTA_PTC1_PATHWAY	0.64942425	1.3690865	0.13441955	0.24237663	0.989
REACTOME_TRANSLATION	0.76421934	1.368127	0.09561753	0.24258047	0.989
REACTOME_PROCESSING_OF_INTRONLESS_PRE_MRNAS	0.4806679	1.3695616	0.11895161	0.2428897	0.989
REACTOME_CIRCADIAN_REPRESSION_OF_EXPRESSION_BY_REV_ERBA	0.38280025	1.3670944	0.11710037	0.24296042	0.989
REACTOME_MITOTIC_G2_G2_M_PHASES	0.4277182	1.3761609	0.091451295	0.24302599	0.989
BIOCARTA_AGPCR_PATHWAY	-0.68339074	-1.3959	0.08582834	0.2436201	0.985
REACTOME_CYTOSOLIC_TRNA_AMINOACYLATION	0.6693154	1.3698366	0.09920635	0.24365142	0.989
REACTOME_CELL_DEATH_SIGNALLING_VIA_NRAGE_NRIF_AND_NADE	0.41217065	1.3641707	0.061099797	0.24642529	0.99
BIOCARTA_RANMS_PATHWAY	0.6945099	1.3619344	0.12720157	0.24887525	0.991
KEGG_NUCLEOTIDE_EXCISION_REPAIR	0.40434545	1.3581363	0.11462451	0.25021887	0.991
REACTOME_HS_GAG_DEGRADATION	0.5283053	1.3595848	0.10838446	0.25023964	0.991
BIOCARTA_MTA3_PATHWAY	0.7227424	1.360173	0.08301158	0.25042203	0.991
REACTOME_IL_7_SIGNALING	-0.55788577	-1.3905559	0.09	0.25055605	0.985
REACTOME_P75_NTR_RECEPTOR_MEDIATED_SIGNALLING	0.41158333	1.356974	0.08251473	0.2507873	0.992
REACTOME_INSULIN_SYNTHESIS_AND_PROCESSING	0.515445	1.3583807	0.0707457	0.25094703	0.991
BIOCARTA_ALK_PATHWAY	-0.43606982	-1.3889933	0.0955414	0.2516064	0.986
BIOCARTA_RAB_PATHWAY	0.5966165	1.3535951	0.13398059	0.2534031	0.992
REACTOME_POST_TRANSLATIONAL_MODIFICATION_SYNTHESIS_OF_GPI_ANCHORED_PROTEINS	0.5456175	1.3539642	0.14734773	0.25400227	0.992
REACTOME_GRB2_EVENTS_IN_ERBB2_SIGNALING	0.45076227	1.3512604	0.126	0.25502127	0.992
REACTOME_INTERFERON_GAMMA_SIGNALING	0.51529974	1.351735	0.17193677	0.2553417	0.992
KEGG_GLYCOSAMINOGLYCAN_BIOSYNTHESIS_HEPARAN_SULFATE	0.4121169	1.3433093	0.14893617	0.25618476	0.992
REACTOME_SYNTHESIS_AND_INTERCONVERSION_OF_NUCLEOTIDE_DI_AND_TRIPHOSPHATES	0.59493285	1.3488607	0.13855422	0.25642726	0.992
REACTOME_ANTIGEN_PRESENTATION_FOLDING_ASSEMBLY_AND_PEPTIDE_LOADING_OF_CLASS_I_MHC	0.73865557	1.3416456	0.14877589	0.25669977	0.992
REACTOME_APC_C_CDC20_MEDIATED_DEGRADATION_OF_MITOTIC_PROTEINS	0.67704576	1.3492969	0.15737052	0.2569067	0.992
KEGG_PROTEIN_EXPORT	0.78140736	1.3434871	0.12062257	0.25701988	0.992
KEGG_SMALL_CELL_LUNG_CANCER	0.39053747	1.3418838	0.09497207	0.25736934	0.992
BIOCARTA_ARAP_PATHWAY	0.48707533	1.3473924	0.12427185	0.25768667	0.992
REACTOME_ANTIGEN_PROCESSING_UBIQUITINATION_PROTEASOME_DEGRADATION	0.5060771	1.3466771	0.14257425	0.2577347	0.992
REACTOME_PERK_REGULATED_GENE_EXPRESSION	0.5486453	1.3450366	0.11380597	0.25788707	0.992
REACTOME_INFLUENZA_VIRAL_RNA_TRANSCRIPTION_AND_REPLICATION	0.76582164	1.3436171	0.14624506	0.25788817	0.992
REACTOME_CYTOKINE_SIGNALING_IN_IMMUNE_SYSTEM	0.38424218	1.3439058	0.11730769	0.25848377	0.992
REACTOME_APOPTOTIC_EXECUTION_PHASE	0.4859643	1.3450599	0.07335907	0.25896394	0.992
REACTOME_CONVERSION_FROM_APC_C_CDC20_TO_APC_C_CDH1_IN_LATE_ANAPHASE	0.5199667	1.3386625	0.14473684	0.26001996	0.993
REACTOME_GLOBAL_GENOMIC_NER_GG_NER	0.42223048	1.3345754	0.11890838	0.26418662	0.994
KEGG_GLYCOSPHINGOLIPID_BIOSYNTHESIS_GANGLIO_SERIES	0.51417226	1.3313266	0.10754717	0.2645811	0.994
REACTOME_SYNTHESIS_OF_SUBSTRATES_IN_N_GLYCAN_BIOSYTHESIS	0.62651503	1.3347293	0.10526316	0.2650373	0.994
KEGG_TYPE_I_DIABETES_MELLITUS	0.503145	1.3316665	0.1453831	0.265219	0.994
REACTOME_MTORC1_MEDIATED_SIGNALLING	0.556794	1.3321247	0.16363636	0.2657182	0.994
BIOCARTA_SKP2E2F_PATHWAY	0.53543776	1.3327928	0.14340344	0.26576802	0.994
REACTOME_THROMBIN_SIGNALLING_THROUGH_PROTEINASE_ACTIVATED_RECEPTORS_PARS	-0.406976	-1.3791499	0.10700389	0.26644883	0.987
REACTOME_ACTIVATION_OF_THE_MRNA_UPON_BINDING_OF_THE_CAP_BINDING_COMPLEX_AND_EIFS_AND_SUBSEQUENT_BINDING_TO_43S	0.7730658	1.3267108	0.12673268	0.27072793	0.994
REACTOME_APOPTOSIS	0.5085404	1.3256482	0.1515748	0.2710703	0.994
REACTOME_ADHERENS_JUNCTIONS_INTERACTIONS	0.42392668	1.3247249	0.09774436	0.27128863	0.995
REACTOME_RNA_POL_III_TRANSCRIPTION_INITIATION_FROM_TYPE_3_PROMOTER	0.4083392	1.3230338	0.15234375	0.27177876	0.995
REACTOME_ORC1_REMOVAL_FROM_CHROMATIN	0.64086306	1.321511	0.17025441	0.27190727	0.995
REACTOME_FGFR2C_LIGAND_BINDING_AND_ACTIVATION	-0.52645504	-1.3677009	0.13052209	0.27194443	0.987
REACTOME_NEGATIVE_REGULATORS_OF_RIG_I_MDA5_SIGNALING	0.488353	1.3191093	0.17634855	0.27235022	0.995
REACTOME_3_UTR_MEDIATED_TRANSLATIONAL_REGULATION	0.7780636	1.3197274	0.1541502	0.27249485	0.995
REACTOME_AMYLOIDS	0.4238616	1.3168473	0.07317073	0.2725177	0.995
REACTOME_DOUBLE_STRAND_BREAK_REPAIR	0.42818582	1.3231338	0.17279412	0.27269548	0.995
KEGG_RIBOSOME	0.8129968	1.3216478	0.13654618	0.272774	0.995
BIOCARTA_CLASSIC_PATHWAY	-0.76293653	-1.3680742	0.104166664	0.27281716	0.987
REACTOME_APC_C_CDH1_MEDIATED_DEGRADATION_OF_CDC20_AND_OTHER_APC_C_CDH1_TARGETED_PROTEINS_IN_LATE_MITOSIS_EARLY_G1	0.64417154	1.3179656	0.17928287	0.27285263	0.995
BIOCARTA_AKAP13_PATHWAY	-0.7046289	-1.3735349	0.08032128	0.27296314	0.987
REACTOME_NUCLEAR_RECEPTOR_TRANSCRIPTION_PATHWAY	-0.3800025	-1.3724483	0.118	0.27323535	0.987
BIOCARTA_PARKIN_PATHWAY	0.5347608	1.3170416	0.16342412	0.27324507	0.995
REACTOME_GAP_JUNCTION_DEGRADATION	0.70056254	1.319832	0.11046512	0.27337143	0.995
REACTOME_REGULATION_OF_INSULIN_SECRETION	-0.45149642	-1.3740169	0.0995935	0.2737697	0.987
KEGG_LIMONENE_AND_PINENE_DEGRADATION	-0.7643196	-1.3683333	0.10763209	0.2739725	0.987
KEGG_ETHER_LIPID_METABOLISM	-0.48566025	-1.3710732	0.092519686	0.27399865	0.987
REACTOME_ASSEMBLY_OF_THE_PRE_REPLICATIVE_COMPLEX	0.6388584	1.313946	0.17261904	0.2745527	0.995
REACTOME_G_PROTEIN_BETA_GAMMA_SIGNALLING	-0.48157653	-1.3650018	0.113502935	0.27474022	0.988
REACTOME_G_ALPHA_Q_SIGNALLING_EVENTS	-0.36925057	-1.3686463	0.08123791	0.2749877	0.987
REACTOME_REGULATION_OF_MRNA_STABILITY_BY_PROTEINS_THAT_BIND_AU_RICH_ELEMENTS	0.62673193	1.3143456	0.188	0.2750339	0.995
REACTOME_EFFECTS_OF_PIP2_HYDROLYSIS	-0.48744306	-1.3611083	0.15869981	0.27530232	0.99
REACTOME_ACYL_CHAIN_REMODELLING_OF_PC	-0.53655386	-1.369273	0.12598425	0.27545497	0.987
REACTOME_SIGNALING_BY_FGFR	-0.36343732	-1.3601018	0.07489879	0.27559075	0.991
REACTOME_NUCLEOTIDE_LIKE_PURINERGIC_RECEPTORS	-0.5666481	-1.3614025	0.1010101	0.27632916	0.989
REACTOME_GABA_RECEPTOR_ACTIVATION	-0.3771246	-1.3615357	0.12549801	0.2776004	0.989
BIOCARTA_CCR5_PATHWAY	-0.5710065	-1.3616779	0.16242662	0.2789201	0.989
BIOCARTA_CYTOKINE_PATHWAY	-0.56350774	-1.3566589	0.140625	0.27955002	0.991
REACTOME_HEPARAN_SULFATE_HEPARIN_HS_GAG_METABOLISM	0.39745387	1.3095713	0.09626719	0.28025368	0.995
REACTOME_PEPTIDE_CHAIN_ELONGATION	0.80382687	1.3073251	0.16699801	0.28150758	0.995
REACTOME_RNA_POL_I_TRANSCRIPTION_TERMINATION	0.50121766	1.3077323	0.12820514	0.2819517	0.995
REACTOME_FORMATION_OF_THE_TERNARY_COMPLEX_AND_SUBSEQUENTLY_THE_43S_COMPLEX	0.7808814	1.3006018	0.16435644	0.28538567	0.996
REACTOME_VIRAL_MESSENGER_RNA_SYNTHESIS	0.5789385	1.304027	0.16306484	0.28561127	0.996
REACTOME_ARMS_MEDIATED_ACTIVATION	0.4776136	1.3006907	0.15105163	0.2863075	0.996
REACTOME_CDT1_ASSOCIATION_WITH_THE_CDC6_ORC_ORIGIN_COMPLEX	0.6592903	1.2985966	0.1882353	0.2864103	0.996
KEGG_GRAFT_VERSUS_HOST_DISEASE	0.5125742	1.3013104	0.188	0.28648555	0.996
REACTOME_P75NTR_RECRUITS_SIGNALLING_COMPLEXES	0.5446726	1.3018603	0.1764706	0.2866923	0.996
REACTOME_METABOLISM_OF_NUCLEOTIDES	0.4422551	1.2987947	0.14257029	0.28713542	0.996
REACTOME_TRANSCRIPTIONAL_ACTIVITY_OF_SMAD2_SMAD3_SMAD4_HETEROTRIMER	0.4190359	1.3022298	0.1492248	0.28717902	0.996
BIOCARTA_CARM_ER_PATHWAY	0.3852506	1.2968724	0.12884615	0.2879424	0.996
REACTOME_HORMONE_SENSITIVE_LIPASE_HSL_MEDIATED_TRIACYLGLYCEROL_HYDROLYSIS	-0.83704	-1.3498784	0.052313883	0.28902867	0.991
BIOCARTA_IL22BP_PATHWAY	-0.4898986	-1.3455764	0.12252964	0.2891077	0.991
BIOCARTA_STEM_PATHWAY	-0.5484084	-1.3487662	0.12922466	0.28940892	0.991
REACTOME_GLYCOGEN_BREAKDOWN_GLYCOGENOLYSIS	-0.71852905	-1.3459312	0.099804305	0.29004812	0.991
REACTOME_SIGNALING_BY_GPCR	-0.32552227	-1.3463833	0.051759835	0.29067534	0.991
REACTOME_FACILITATIVE_NA_INDEPENDENT_GLUCOSE_TRANSPORTERS	0.54389566	1.2892548	0.17165668	0.29072827	0.996
BIOCARTA_P38MAPK_PATHWAY	0.3986907	1.2934811	0.13545817	0.2908684	0.996
KEGG_GNRH_SIGNALING_PATHWAY	-0.33655566	-1.3433776	0.11028037	0.29127365	0.991
REACTOME_HYALURONAN_METABOLISM	0.5352699	1.2939334	0.15310077	0.29128876	0.996
REACTOME_SHC1_EVENTS_IN_EGFR_SIGNALING	0.48059613	1.2916737	0.17485265	0.29137444	0.996
REACTOME_SHC_RELATED_EVENTS	0.4597208	1.2893609	0.13725491	0.2915852	0.996
REACTOME_SHC_MEDIATED_SIGNALLING	0.4792324	1.290025	0.13916501	0.29171067	0.996
REACTOME_MRNA_CAPPING	0.47221366	1.2920368	0.17248061	0.2918828	0.996
BIOCARTA_BAD_PATHWAY	-0.52005583	-1.3464506	0.092402466	0.29210606	0.991
REACTOME_INITIAL_TRIGGERING_OF_COMPLEMENT	-0.7639613	-1.3418931	0.11478599	0.2921092	0.991
REACTOME_CLASS_I_MHC_MEDIATED_ANTIGEN_PROCESSING_PRESENTATION	0.4990469	1.2901844	0.21621622	0.29251233	0.996
REACTOME_RNA_POL_III_CHAIN_ELONGATION	0.49513122	1.2854929	0.19329388	0.2931653	0.996
REACTOME_ER_PHAGOSOME_PATHWAY	0.7002309	1.2858036	0.22772278	0.29385868	0.996
REACTOME_ABORTIVE_ELONGATION_OF_HIV1_TRANSCRIPT_IN_THE_ABSENCE_OF_TAT	0.49795055	1.2863946	0.18055555	0.2939858	0.996
REACTOME_ADENYLATE_CYCLASE_ACTIVATING_PATHWAY	-0.55653465	-1.3398148	0.16135459	0.2940712	0.991
REACTOME_RNA_POL_II_PRE_TRANSCRIPTION_EVENTS	0.41126147	1.2830647	0.15789473	0.2946716	0.996
REACTOME_FORMATION_OF_THE_HIV1_EARLY_ELONGATION_COMPLEX	0.4646173	1.2831899	0.15913557	0.29552075	0.996
BIOCARTA_MAPK_PATHWAY	-0.32840437	-1.3378143	0.08722109	0.295941	0.991
REACTOME_SCF_BETA_TRCP_MEDIATED_DEGRADATION_OF_EMI1	0.6771176	1.2806966	0.19517103	0.2961594	0.996
REACTOME_PURINE_METABOLISM	0.49901402	1.281067	0.17399618	0.29659456	0.996
REACTOME_NRAGE_SIGNALS_DEATH_THROUGH_JNK	0.38343275	1.2788357	0.13257575	0.29685158	0.996
KEGG_PATHOGENIC_ESCHERICHIA_COLI_INFECTION	0.53678113	1.2780662	0.18489066	0.2969465	0.996
REACTOME_TRANSMISSION_ACROSS_CHEMICAL_SYNAPSES	-0.31234106	-1.3362017	0.07645875	0.29733709	0.991
REACTOME_ELONGATION_ARREST_AND_RECOVERY	0.47343045	1.2789893	0.18145956	0.29762182	0.996
REACTOME_GPCR_DOWNSTREAM_SIGNALING	-0.33361763	-1.3300896	0.06854839	0.30150115	0.992
REACTOME_SIGNALING_BY_BMP	-0.5170545	-1.3318928	0.15492958	0.30155465	0.992
KEGG_TASTE_TRANSDUCTION	-0.44500646	-1.3308108	0.1352459	0.30169392	0.992
REACTOME_CDC6_ASSOCIATION_WITH_THE_ORC_ORIGIN_COMPLEX	0.53463215	1.2742915	0.21904762	0.30172744	0.996
REACTOME_FORMATION_OF_TUBULIN_FOLDING_INTERMEDIATES_BY_CCT_TRIC	0.74972653	1.2734648	0.17760618	0.30199847	0.996
REACTOME_THE_NLRP3_INFLAMMASOME	0.5637597	1.2721838	0.16179337	0.30284125	0.996
REACTOME_REGULATION_OF_INSULIN_SECRETION_BY_GLUCAGON_LIKE_PEPTIDE1	-0.49449793	-1.3319756	0.12948208	0.3029248	0.991
REACTOME_DOWNSTREAM_SIGNALING_EVENTS_OF_B_CELL_RECEPTOR_BCR	0.5130579	1.2707217	0.23772103	0.30390364	0.996
REACTOME_AUTODEGRADATION_OF_CDH1_BY_CDH1_APC_C	0.64607096	1.2621702	0.24752475	0.30442616	0.997
KEGG_ONE_CARBON_POOL_BY_FOLATE	0.4733584	1.2686776	0.14258912	0.3048372	0.996
REACTOME_INFLAMMASOMES	0.49135014	1.2623314	0.17601547	0.3052086	0.997
REACTOME_FORMATION_OF_TRANSCRIPTION_COUPLED_NER_TC_NER_REPAIR_COMPLEX	0.4836372	1.2687972	0.18023255	0.30570668	0.996
REACTOME_SCFSKP2_MEDIATED_DEGRADATION_OF_P27_P21	0.6448512	1.2623435	0.22664016	0.30617157	0.997
REACTOME_CYCLIN_E_ASSOCIATED_EVENTS_DURING_G1_S_TRANSITION_	0.60802644	1.2560766	0.2306163	0.3063649	0.997
REACTOME_RNA_POL_II_TRANSCRIPTION_PRE_INITIATION_AND_PROMOTER_OPENING	0.43188083	1.2667851	0.18939394	0.30660495	0.996
REACTOME_IMMUNOREGULATORY_INTERACTIONS_BETWEEN_A_LYMPHOID_AND_A_NON_LYMPHOID_CELL	0.45392337	1.2566539	0.20517929	0.30662864	0.997
REACTOME_DESTABILIZATION_OF_MRNA_BY_AUF1_HNRNP_D0	0.6878184	1.2624437	0.22376238	0.3070341	0.997
REACTOME_PROLONGED_ERK_ACTIVATION_EVENTS	0.43647984	1.2548815	0.16895874	0.30705744	0.997
REACTOME_SIGNALING_BY_WNT	0.62226075	1.2576058	0.24652088	0.30710185	0.997
KEGG_PRIMARY_IMMUNODEFICIENCY	0.42309394	1.2568823	0.20281124	0.30726838	0.997
BIOCARTA_CTL_PATHWAY	0.5509503	1.2581291	0.19591837	0.3072803	0.997
BIOCARTA_NEUROTRANSMITTERS_PATHWAY	0.596326	1.2584962	0.20159681	0.3076594	0.997
REACTOME_GLUTATHIONE_CONJUGATION	0.46598598	1.2644892	0.16064256	0.30802366	0.996
REACTOME_ADAPTIVE_IMMUNE_SYSTEM	0.38112992	1.2624447	0.21083172	0.3080375	0.997
REACTOME_ACTIVATION_OF_NF_KAPPAB_IN_B_CELLS	0.60028297	1.258732	0.2579365	0.30832806	0.997
REACTOME_PROTEIN_FOLDING	0.6032327	1.2526116	0.21899225	0.30833963	0.997
REACTOME_DESTABILIZATION_OF_MRNA_BY_KSRP	0.52291775	1.2629642	0.22222222	0.30835944	0.997
REACTOME_P53_INDEPENDENT_G1_S_DNA_DAMAGE_CHECKPOINT	0.65580964	1.253201	0.24297188	0.30836612	0.997
KEGG_ALLOGRAFT_REJECTION	0.5132469	1.2646946	0.21917808	0.30873457	0.996
KEGG_PROTEASOME	0.6837489	1.2501683	0.25298804	0.3090127	0.997
REACTOME_P53_DEPENDENT_G1_DNA_DAMAGE_RESPONSE	0.6442436	1.2630689	0.22574258	0.30920497	0.997
REACTOME_IRAK1_RECRUITS_IKK_COMPLEX	0.5542578	1.2513491	0.21553399	0.30921444	0.997
REACTOME_GAP_JUNCTION_TRAFFICKING	0.4894761	1.2492042	0.20281124	0.3095767	0.997
REACTOME_TRANSPORT_OF_VITAMINS_NUCLEOSIDES_AND_RELATED_MOLECULES	0.3888899	1.2503687	0.20380953	0.30965912	0.997
REACTOME_SIGNALING_BY_CONSTITUTIVELY_ACTIVE_EGFR	0.4901482	1.2482353	0.18627451	0.31006187	0.997
REACTOME_ACETYLCHOLINE_NEUROTRANSMITTER_RELEASE_CYCLE	-0.5125072	-1.3227986	0.14489795	0.31041923	0.992
BIOCARTA_CARM1_PATHWAY	-0.6510016	-1.3237277	0.13253012	0.31049374	0.992
REACTOME_CASPASE_MEDIATED_CLEAVAGE_OF_CYTOSKELETAL_PROTEINS	-0.62462765	-1.3210318	0.13709678	0.31185356	0.993
REACTOME_VIF_MEDIATED_DEGRADATION_OF_APOBEC3G	0.66579795	1.2458119	0.26147705	0.3125031	0.997
REACTOME_CYTOCHROME_P450_ARRANGED_BY_SUBSTRATE_TYPE	-0.4144639	-1.3151898	0.15243903	0.31289592	0.995
BIOCARTA_ECM_PATHWAY	-0.47536996	-1.3157322	0.13709678	0.3135066	0.995
KEGG_DORSO_VENTRAL_AXIS_FORMATION	-0.41432244	-1.3181949	0.15368421	0.313768	0.995
REACTOME_NOTCH_HLH_TRANSCRIPTION_PATHWAY	-0.50177026	-1.3173969	0.15060242	0.3137754	0.995
REACTOME_GABA_B_RECEPTOR_ACTIVATION	-0.38335186	-1.3161886	0.12903225	0.31430432	0.995
REACTOME_IL_RECEPTOR_SHC_SIGNALING	-0.39614275	-1.310623	0.12695312	0.31440902	0.995
BIOCARTA_41BB_PATHWAY	-0.43616262	-1.3186353	0.1592233	0.31460324	0.995
REACTOME_PLATELET_SENSITIZATION_BY_LDL	-0.51447856	-1.3130001	0.12955466	0.31485638	0.995
REACTOME_GASTRIN_CREB_SIGNALLING_PATHWAY_VIA_PKC_AND_MAPK	-0.32649475	-1.3121328	0.09369025	0.31486768	0.995
BIOCARTA_IL2RB_PATHWAY	-0.41671664	-1.311139	0.15637065	0.31504032	0.995
REACTOME_SIGNALING_BY_ACTIVATED_POINT_MUTANTS_OF_FGFR1	-0.51333016	-1.3093688	0.18609408	0.3150614	0.996
REACTOME_TIGHT_JUNCTION_INTERACTIONS	0.4080118	1.2427856	0.20722434	0.3156718	0.997
REACTOME_CDK_MEDIATED_PHOSPHORYLATION_AND_REMOVAL_OF_CDC6	0.657676	1.2413964	0.25889328	0.31576115	0.997
REACTOME_INTERFERON_ALPHA_BETA_SIGNALING	0.49583453	1.2419617	0.2515213	0.31591478	0.997
REACTOME_FORMATION_OF_RNA_POL_II_ELONGATION_COMPLEX_	0.43372875	1.2398114	0.19560878	0.3160064	0.997
REACTOME_NUCLEAR_EVENTS_KINASE_AND_TRANSCRIPTION_FACTOR_ACTIVATION	0.44079137	1.2404511	0.25146198	0.316088	0.997
BIOCARTA_CFTR_PATHWAY	-0.6533542	-1.3072306	0.13916501	0.31729507	0.996
REACTOME_STEROID_HORMONES	-0.45958775	-1.3026189	0.15294118	0.31760418	0.996
REACTOME_RAS_ACTIVATION_UOPN_CA2_INFUX_THROUGH_NMDA_RECEPTOR	-0.5200481	-1.3059876	0.20428015	0.31773382	0.996
REACTOME_CHYLOMICRON_MEDIATED_LIPID_TRANSPORT	-0.59875566	-1.3036082	0.11960784	0.3188681	0.996
REACTOME_IL_6_SIGNALING	-0.55959684	-1.3027147	0.13188976	0.3189153	0.996
REACTOME_BIOSYNTHESIS_OF_THE_N_GLYCAN_PRECURSOR_DOLICHOL_LIPID_LINKED_OLIGOSACCHARIDE_LLO_AND_TRANSFER_TO_A_NASCENT_PROTEIN	0.47511953	1.2362802	0.18902439	0.31906164	0.997
REACTOME_FGFR4_LIGAND_BINDING_AND_ACTIVATION	-0.51342106	-1.3009199	0.18661258	0.31910563	0.996
REACTOME_APOPTOTIC_CLEAVAGE_OF_CELLULAR_PROTEINS	0.48348877	1.236919	0.17307693	0.31911075	0.997
REACTOME_AUTODEGRADATION_OF_THE_E3_UBIQUITIN_LIGASE_COP1	0.6583041	1.2347842	0.26693228	0.31933856	0.997
REACTOME_HYALURONAN_UPTAKE_AND_DEGRADATION	0.5033259	1.2353426	0.22053231	0.3194764	0.997
REACTOME_PURINE_CATABOLISM	-0.7889048	-1.3040718	0.11089109	0.3195775	0.996
BIOCARTA_P53_PATHWAY	0.46599	1.2329935	0.21575984	0.32089034	0.997
REACTOME_CHONDROITIN_SULFATE_DERMATAN_SULFATE_METABOLISM	0.42989677	1.228592	0.20696326	0.32622617	0.998
REACTOME_ENDOSOMAL_VACUOLAR_PATHWAY	0.82586414	1.2267034	0.26499033	0.32701594	0.998
REACTOME_TRAF3_DEPENDENT_IRF_ACTIVATION_PATHWAY	0.4472836	1.2259465	0.2413088	0.3270912	0.998
BIOCARTA_CDC42RAC_PATHWAY	0.6256888	1.2272056	0.251497	0.3272859	0.998
REACTOME_DESTABILIZATION_OF_MRNA_BY_BRF1	0.53473794	1.2240988	0.23518164	0.32898924	0.998
REACTOME_ADENYLATE_CYCLASE_INHIBITORY_PATHWAY	-0.53301936	-1.2929759	0.17959183	0.3291942	0.996
REACTOME_PYRUVATE_METABOLISM	-0.61205626	-1.2935768	0.17970401	0.32965896	0.996
REACTOME_CROSS_PRESENTATION_OF_SOLUBLE_EXOGENOUS_ANTIGENS_ENDOSOMES	0.6272864	1.2224063	0.28458497	0.33035848	0.998
REACTOME_REGULATION_OF_APOPTOSIS	0.6136892	1.2205548	0.27722773	0.3320517	0.998
BIOCARTA_KREB_PATHWAY	-0.76131463	-1.2884798	0.12981744	0.33555156	0.996
BIOCARTA_RHO_PATHWAY	0.4319764	1.2171335	0.25831702	0.3358853	0.999
BIOCARTA_PROTEASOME_PATHWAY	0.70425576	1.2155265	0.30218688	0.3372874	0.999
REACTOME_REGULATION_OF_PYRUVATE_DEHYDROGENASE_PDH_COMPLEX	-0.56979316	-1.285743	0.18709677	0.33888128	0.996
KEGG_VIRAL_MYOCARDITIS	0.42577243	1.2132747	0.23976608	0.3393985	0.999
REACTOME_LYSOSOME_VESICLE_BIOGENESIS	0.3981802	1.2110639	0.18181819	0.33968127	0.999
BIOCARTA_EIF2_PATHWAY	0.51980174	1.209828	0.25968993	0.3403664	0.999
REACTOME_PREFOLDIN_MEDIATED_TRANSFER_OF_SUBSTRATE_TO_CCT_TRIC	0.6723524	1.2118449	0.26195028	0.3405486	0.999
REACTOME_SIGNALING_BY_THE_B_CELL_RECEPTOR_BCR	0.4353664	1.211099	0.26946107	0.34059307	0.999
REACTOME_CTNNB1_PHOSPHORYLATION_CASCADE	0.5064152	1.207812	0.28125	0.3420975	0.999
REACTOME_CITRIC_ACID_CYCLE_TCA_CYCLE	-0.6235994	-1.2829452	0.20967741	0.34234652	0.996
BIOCARTA_CDK5_PATHWAY	-0.48857677	-1.281131	0.1755102	0.34249106	0.996
REACTOME_SIGNALING_BY_FGFR_IN_DISEASE	-0.33326766	-1.279351	0.14343435	0.34252742	0.996
KEGG_PORPHYRIN_AND_CHLOROPHYLL_METABOLISM	-0.4429284	-1.2798966	0.15686275	0.3431854	0.996
REACTOME_SIGNALING_BY_NODAL	-0.42862377	-1.2814988	0.17283951	0.3433199	0.996
REACTOME_ROLE_OF_DCC_IN_REGULATING_APOPTOSIS	0.51257235	1.2043506	0.25968993	0.34494057	0.999
REACTOME_ENERGY_DEPENDENT_REGULATION_OF_MTOR_BY_LKB1_AMPK	0.37748048	1.2048348	0.23182711	0.34522942	0.999
REACTOME_GPCR_LIGAND_BINDING	-0.33532274	-1.2751988	0.11177645	0.34815645	0.996
REACTOME_ABC_FAMILY_PROTEINS_MEDIATED_TRANSPORT	-0.4357575	-1.2733519	0.13426854	0.34966832	0.997
KEGG_ENDOMETRIAL_CANCER	0.3203078	1.199041	0.19553073	0.35085732	0.999
REACTOME_SMAD2_SMAD3_SMAD4_HETEROTRIMER_REGULATES_TRANSCRIPTION	0.41762984	1.1994466	0.23529412	0.35119715	0.999
KEGG_REGULATION_OF_AUTOPHAGY	-0.41159418	-1.2711208	0.22664016	0.35189104	0.997
KEGG_ALDOSTERONE_REGULATED_SODIUM_REABSORPTION	0.4012125	1.1959432	0.17850287	0.35437396	0.999
BIOCARTA_CELLCYCLE_PATHWAY	0.45482394	1.1925845	0.25306123	0.35797837	0.999
KEGG_GLYCEROPHOSPHOLIPID_METABOLISM	-0.36145365	-1.2664824	0.15983607	0.35830358	0.997
REACTOME_SIGNAL_ATTENUATION	-0.5262892	-1.2655405	0.21062993	0.3584571	0.997
REACTOME_CELL_JUNCTION_ORGANIZATION	-0.35077402	-1.2645553	0.14526317	0.3586108	0.997
REACTOME_CLASS_A1_RHODOPSIN_LIKE_RECEPTORS	-0.3497318	-1.2636169	0.13	0.35875896	0.997
BIOCARTA_HER2_PATHWAY	-0.4178133	-1.2611939	0.16260162	0.35998392	0.997
BIOCARTA_VIP_PATHWAY	-0.53100306	-1.2620428	0.17171717	0.36003685	0.997
KEGG_LONG_TERM_DEPRESSION	-0.32689846	-1.2601478	0.15694165	0.3601183	0.997
REACTOME_RECRUITMENT_OF_MITOTIC_CENTROSOME_PROTEINS_AND_COMPLEXES	0.37834096	1.1902955	0.2579365	0.36019206	0.999
REACTOME_REGULATION_OF_HYPOXIA_INDUCIBLE_FACTOR_HIF_BY_OXYGEN	0.46441975	1.1886328	0.29158512	0.36161777	0.999
REACTOME_CLASS_B_2_SECRETIN_FAMILY_RECEPTORS	-0.34049606	-1.2567371	0.16768916	0.36307105	0.997
REACTOME_PYRUVATE_METABOLISM_AND_CITRIC_ACID_TCA_CYCLE	-0.55420214	-1.257165	0.23809524	0.3638836	0.997
REACTOME_TRANSMEMBRANE_TRANSPORT_OF_SMALL_MOLECULES	0.28104743	1.1847559	0.14901961	0.36504108	0.999
REACTOME_REGULATION_OF_ORNITHINE_DECARBOXYLASE_ODC	0.6321191	1.1848094	0.33797216	0.36597762	0.999
KEGG_MAPK_SIGNALING_PATHWAY	-0.28502497	-1.2536597	0.1197479	0.36689475	0.997
KEGG_PROXIMAL_TUBULE_BICARBONATE_RECLAMATION	0.43103126	1.1822118	0.20864661	0.36743626	0.999
REACTOME_ALPHA_LINOLENIC_ACID_ALA_METABOLISM	-0.6879323	-1.2493597	0.22352941	0.3680424	0.997
REACTOME_MUSCLE_CONTRACTION	-0.43757874	-1.2498264	0.20892495	0.36871523	0.997
BIOCARTA_PAR1_PATHWAY	-0.39769685	-1.2517364	0.212	0.3687723	0.997
REACTOME_TRANSLOCATION_OF_ZAP_70_TO_IMMUNOLOGICAL_SYNAPSE	0.56609225	1.1801255	0.31027254	0.36945578	0.999
REACTOME_CD28_DEPENDENT_PI3K_AKT_SIGNALING	-0.41648716	-1.2502543	0.19178082	0.36946234	0.997
BIOCARTA_STATHMIN_PATHWAY	-0.49311966	-1.2455685	0.171875	0.37135667	0.999
REACTOME_PHOSPHOLIPID_METABOLISM	-0.31336036	-1.2459723	0.16496944	0.3721737	0.999
REACTOME_GENERIC_TRANSCRIPTION_PATHWAY	0.28065938	1.1754377	0.21401516	0.3752201	0.999
REACTOME_P75NTR_SIGNALS_VIA_NFKB	0.46405688	1.1745728	0.28968254	0.37538382	0.999
REACTOME_MAPK_TARGETS_NUCLEAR_EVENTS_MEDIATED_BY_MAP_KINASES	-0.44062838	-1.2412138	0.23395444	0.37595588	0.999
BIOCARTA_TNFR2_PATHWAY	-0.42789555	-1.241443	0.19762845	0.3769912	0.999
REACTOME_NEF_MEDIATES_DOWN_MODULATION_OF_CELL_SURFACE_RECEPTORS_BY_RECRUITING_THEM_TO_CLATHRIN_ADAPTERS	0.5135512	1.1697965	0.34319526	0.37807155	0.999
KEGG_FOLATE_BIOSYNTHESIS	0.49613926	1.1704708	0.24457593	0.37808493	0.999
KEGG_LYSOSOME	0.33895385	1.1719141	0.2821577	0.3780985	0.999
BIOCARTA_SPPA_PATHWAY	-0.41909963	-1.2380548	0.24649298	0.3782704	0.999
REACTOME_RNA_POL_III_TRANSCRIPTION_TERMINATION	0.43523416	1.1709894	0.2936508	0.37837034	0.999
REACTOME_ACTIVATION_OF_KAINATE_RECEPTORS_UPON_GLUTAMATE_BINDING	-0.38211113	-1.2384135	0.21052632	0.37918392	0.999
REACTOME_SYNTHESIS_OF_PE	0.49527755	1.1656768	0.28070176	0.38117373	0.999
REACTOME_MEMBRANE_TRAFFICKING	0.40489808	1.1670448	0.31213874	0.38125426	0.999
KEGG_PROGESTERONE_MEDIATED_OOCYTE_MATURATION	0.308717	1.1647774	0.23135756	0.3813969	0.999
REACTOME_SIGNALLING_TO_ERKS	0.33378553	1.1657497	0.24902724	0.3820712	0.999
KEGG_LINOLEIC_ACID_METABOLISM	-0.4565066	-1.2338241	0.28190476	0.3823972	0.999
BIOCARTA_IL7_PATHWAY	-0.48063427	-1.225196	0.21106558	0.38244936	0.999
REACTOME_THE_ACTIVATION_OF_ARYLSULFATASES	-0.6247489	-1.2257823	0.23772103	0.38303334	0.999
KEGG_GLYOXYLATE_AND_DICARBOXYLATE_METABOLISM	-0.5498836	-1.2309163	0.1983471	0.3831799	0.999
REACTOME_DOPAMINE_NEUROTRANSMITTER_RELEASE_CYCLE	-0.4700046	-1.2317228	0.22474226	0.38325244	0.999
REACTOME_RECYCLING_PATHWAY_OF_L1	-0.44220504	-1.2271816	0.21756487	0.3835149	0.999
REACTOME_NEURONAL_SYSTEM	-0.29113668	-1.2323983	0.1902834	0.38352677	0.999
REACTOME_SYNTHESIS_SECRETION_AND_DEACYLATION_OF_GHRELIN	-0.61532724	-1.2339544	0.18897638	0.3836675	0.999
REACTOME_STRIATED_MUSCLE_CONTRACTION	-0.45502174	-1.2276918	0.25518674	0.38414633	0.999
KEGG_VASCULAR_SMOOTH_MUSCLE_CONTRACTION	-0.29714403	-1.2258999	0.16167665	0.3842376	0.999
REACTOME_KINESINS	0.44125128	1.1594045	0.2818533	0.38484308	0.999
REACTOME_TCR_SIGNALING	0.3363189	1.1585239	0.2647059	0.38511738	0.999
REACTOME_TRANSPORT_OF_GLUCOSE_AND_OTHER_SUGARS_BILE_SALTS_AND_ORGANIC_ACIDS_METAL_IONS_AND_AMINE_COMPOUNDS	0.33508664	1.1612549	0.27394637	0.38534027	0.999
REACTOME_ENOS_ACTIVATION_AND_REGULATION	0.51384735	1.1597883	0.28375733	0.3853562	0.999
REACTOME_IL_3_5_AND_GM_CSF_SIGNALING	-0.35185853	-1.2278181	0.2193159	0.38540152	0.999
KEGG_SYSTEMIC_LUPUS_ERYTHEMATOSUS	0.34797388	1.1602725	0.248	0.38568825	0.999
BIOCARTA_TRKA_PATHWAY	-0.4467957	-1.2284939	0.21314742	0.38570374	0.999
BIOCARTA_CELL2CELL_PATHWAY	0.40796652	1.1553191	0.26806083	0.38861814	0.999
REACTOME_ANTIGEN_PROCESSING_CROSS_PRESENTATION	0.5733174	1.1530879	0.3655706	0.38975254	0.999
REACTOME_GLYCOSAMINOGLYCAN_METABOLISM	0.32625362	1.1523517	0.24564797	0.38975957	0.999
REACTOME_IMMUNE_SYSTEM	0.3187692	1.1535598	0.26848248	0.39015365	0.999
KEGG_THYROID_CANCER	0.37702814	1.1500988	0.27342257	0.39189914	0.999
KEGG_PRION_DISEASES	-0.41457054	-1.2163773	0.21357286	0.39433855	0.999
BIOCARTA_CK1_PATHWAY	-0.5457897	-1.2171938	0.22745098	0.39442542	0.999
REACTOME_COMMON_PATHWAY	-0.57456934	-1.210946	0.21212122	0.3944902	0.999
REACTOME_SYNTHESIS_OF_VERY_LONG_CHAIN_FATTY_ACYL_COAS	-0.63966376	-1.2090389	0.27380952	0.39478964	0.999
BIOCARTA_HIF_PATHWAY	0.60523856	1.1473299	0.34174758	0.3948414	0.999
KEGG_ASCORBATE_AND_ALDARATE_METABOLISM	-0.6107477	-1.2150729	0.25103736	0.39504352	0.999
BIOCARTA_INTRINSIC_PATHWAY	-0.4814151	-1.2110549	0.22626263	0.3957298	0.999
KEGG_TIGHT_JUNCTION	-0.29942006	-1.2092459	0.17975207	0.39589974	0.999
BIOCARTA_CSK_PATHWAY	-0.5046133	-1.2117242	0.234	0.39614952	0.999
REACTOME_METABOLISM_OF_STEROID_HORMONES_AND_VITAMINS_A_AND_D	-0.41967973	-1.211885	0.23153692	0.39740604	0.999
REACTOME_SIGNALING_BY_ERBB2	-0.32133415	-1.2124186	0.18163672	0.3979127	0.999
REACTOME_SIGNALING_BY_ERBB4	-0.32481915	-1.2057664	0.20916335	0.3985658	0.999
REACTOME_MAP_KINASE_ACTIVATION_IN_TLR_CASCADE	-0.34376106	-1.2030207	0.23434344	0.40154275	0.999
REACTOME_MEIOTIC_RECOMBINATION	0.3531579	1.1403589	0.30522087	0.40398297	1
REACTOME_ACTIVATION_OF_NMDA_RECEPTOR_UPON_GLUTAMATE_BINDING_AND_POSTSYNAPTIC_EVENTS	-0.37068734	-1.2001973	0.27027026	0.40488994	0.999
BIOCARTA_TGFB_PATHWAY	0.42091382	1.1384963	0.2947977	0.40559545	1
REACTOME_MRNA_DECAY_BY_3_TO_5_EXORIBONUCLEASE	0.536234	1.1369662	0.35135135	0.40678862	1
REACTOME_IKK_COMPLEX_RECRUITMENT_MEDIATED_BY_RIP1	-0.566543	-1.1960057	0.27920792	0.4090636	0.999
KEGG_ABC_TRANSPORTERS	-0.36880898	-1.1964248	0.18346775	0.40978062	0.999
REACTOME_PROTEOLYTIC_CLEAVAGE_OF_SNARE_COMPLEX_PROTEINS	-0.42278185	-1.1918589	0.2777778	0.41313973	0.999
REACTOME_SIGNALING_BY_TGF_BETA_RECEPTOR_COMPLEX	0.36965382	1.1308072	0.32108316	0.4134883	1
REACTOME_NFKB_AND_MAP_KINASES_ACTIVATION_MEDIATED_BY_TLR4_SIGNALING_REPERTOIRE	-0.334788	-1.192508	0.23505977	0.4135419	0.999
REACTOME_METABOLISM_OF_POLYAMINES	0.5685125	1.1310186	0.32416502	0.41422394	1
REACTOME_RNA_POL_I_PROMOTER_OPENING	0.4151108	1.1285788	0.30861723	0.41442537	1
REACTOME_A_TETRASACCHARIDE_LINKER_SEQUENCE_IS_REQUIRED_FOR_GAG_SYNTHESIS	0.46016702	1.1291265	0.30478087	0.4146845	1
BIOCARTA_MONOCYTE_PATHWAY	-0.49176767	-1.1890463	0.27108434	0.41488928	0.999
REACTOME_HEMOSTASIS	-0.31440803	-1.1897395	0.19427402	0.4151596	0.999
REACTOME_SYNTHESIS_OF_PC	-0.4180452	-1.1878461	0.2422998	0.41545513	0.999
KEGG_ALANINE_ASPARTATE_AND_GLUTAMATE_METABOLISM	-0.3782269	-1.1858091	0.25192308	0.4159986	0.999
REACTOME_FATTY_ACYL_COA_BIOSYNTHESIS	-0.5836538	-1.1860266	0.31610337	0.41706252	0.999
REACTOME_DESTABILIZATION_OF_MRNA_BY_TRISTETRAPROLIN_TTP	0.49904737	1.1251767	0.3785851	0.41844553	1
KEGG_PATHWAYS_IN_CANCER	0.26858667	1.1235832	0.26640928	0.41958845	1
BIOCARTA_CTCF_PATHWAY	-0.47628662	-1.1823528	0.26349893	0.4199713	0.999
REACTOME_CIRCADIAN_CLOCK	0.31636995	1.1208814	0.30842912	0.42252988	1
KEGG_ARRHYTHMOGENIC_RIGHT_VENTRICULAR_CARDIOMYOPATHY_ARVC	0.3219776	1.1191111	0.29962546	0.4240165	1
BIOCARTA_NDKDYNAMIN_PATHWAY	0.46571633	1.117647	0.3464567	0.4250219	1
REACTOME_DARPP_32_EVENTS	-0.51146966	-1.1768198	0.29215688	0.42777762	0.999
REACTOME_CELL_CELL_COMMUNICATION	-0.29520747	-1.1741617	0.2037037	0.42954797	0.999
REACTOME_G_ALPHA_I_SIGNALLING_EVENTS	-0.3184965	-1.1743883	0.23395444	0.43067974	0.999
REACTOME_EXTRACELLULAR_MATRIX_ORGANIZATION	0.40846848	1.1125447	0.3172147	0.43127877	1
KEGG_ALPHA_LINOLENIC_ACID_METABOLISM	-0.4724851	-1.1721177	0.29101562	0.431353	1
REACTOME_PEPTIDE_LIGAND_BINDING_RECEPTORS	-0.3289674	-1.1710577	0.20436507	0.4316717	1
BIOCARTA_EIF4_PATHWAY	-0.48049593	-1.1689409	0.28423238	0.43210328	1
REACTOME_BOTULINUM_NEUROTOXICITY	-0.38064137	-1.1690389	0.26464647	0.4334107	1
REACTOME_KERATAN_SULFATE_BIOSYNTHESIS	-0.40473205	-1.1665131	0.24848485	0.43341276	1
REACTOME_ACTIVATED_TLR4_SIGNALLING	-0.2980454	-1.1673008	0.24701196	0.43357065	1
REACTOME_AKT_PHOSPHORYLATES_TARGETS_IN_THE_CYTOSOL	0.44434997	1.1097506	0.34368932	0.43430746	1
REACTOME_MITOCHONDRIAL_PROTEIN_IMPORT	0.4002057	1.1085315	0.36883628	0.43503445	1
REACTOME_TRANSFERRIN_ENDOCYTOSIS_AND_RECYCLING	0.4447848	1.1076846	0.34773663	0.43516728	1
KEGG_ECM_RECEPTOR_INTERACTION	0.39980513	1.1069586	0.34291187	0.4352001	1
BIOCARTA_LAIR_PATHWAY	-0.51614016	-1.1631335	0.31340206	0.4359045	1
BIOCARTA_ETC_PATHWAY	0.66054565	1.1056243	0.41873804	0.43606645	1
REACTOME_REGULATION_OF_KIT_SIGNALING	0.36153165	1.1039697	0.3619403	0.4363398	1
REACTOME_FORMATION_OF_ATP_BY_CHEMIOSMOTIC_COUPLING	0.7210921	1.104241	0.4400786	0.43702796	1
REACTOME_ANTIGEN_ACTIVATES_B_CELL_RECEPTOR_LEADING_TO_GENERATION_OF_SECOND_MESSENGERS	-0.3626029	-1.1632832	0.2651072	0.43715426	1
REACTOME_ABCA_TRANSPORTERS_IN_LIPID_HOMEOSTASIS	0.42228958	1.1014123	0.328125	0.43878153	1
REACTOME_CHONDROITIN_SULFATE_BIOSYNTHESIS	0.469645	1.1004438	0.35728544	0.43915242	1
BIOCARTA_ERK5_PATHWAY	-0.37256348	-1.1591173	0.2760736	0.44088805	1
REACTOME_L1CAM_INTERACTIONS	0.28447318	1.0958109	0.32876712	0.44256228	1
REACTOME_INHIBITION_OF_REPLICATION_INITIATION_OF_DAMAGED_DNA_BY_RB1_E2F1	0.45534793	1.096902	0.36381322	0.44315776	1
BIOCARTA_VITCB_PATHWAY	-0.5167046	-1.1567919	0.30081302	0.44317392	1
REACTOME_LOSS_OF_NLP_FROM_MITOTIC_CENTROSOMES	0.36347523	1.0959235	0.3444882	0.44348034	1
REACTOME_PHASE_II_CONJUGATION	0.3495048	1.0914602	0.3444227	0.4476071	1
REACTOME_NEF_MEDIATED_DOWNREGULATION_OF_MHC_CLASS_I_COMPLEX_CELL_SURFACE_EXPRESSION	0.5623764	1.0907613	0.41715398	0.44765607	1
BIOCARTA_CXCR4_PATHWAY	-0.41049466	-1.1522799	0.3030303	0.44768602	1
REACTOME_SIGNALING_BY_ROBO_RECEPTOR	0.37267062	1.0898359	0.3719626	0.4479171	1
REACTOME_INCRETIN_SYNTHESIS_SECRETION_AND_INACTIVATION	-0.47124115	-1.1523596	0.24845996	0.44903252	1
BIOCARTA_TNFR1_PATHWAY	0.33295658	1.0880404	0.35387674	0.4494776	1
KEGG_PENTOSE_PHOSPHATE_PATHWAY	-0.48472664	-1.1462609	0.29208925	0.45186257	1
KEGG_BASAL_TRANSCRIPTION_FACTORS	0.34008136	1.0841763	0.39478585	0.45212066	1
REACTOME_GPVI_MEDIATED_ACTIVATION_CASCADE	0.38362855	1.0845853	0.3713733	0.45257178	1
REACTOME_GLYCOPROTEIN_HORMONES	-0.54580677	-1.1466644	0.2992126	0.45259008	1
REACTOME_SYNTHESIS_OF_PIPS_AT_THE_EARLY_ENDOSOME_MEMBRANE	0.43491805	1.0852014	0.38178295	0.4526504	1
REACTOME_HORMONE_LIGAND_BINDING_RECEPTORS	-0.54358345	-1.1471804	0.34387353	0.45327458	1
REACTOME_METABOLISM_OF_CARBOHYDRATES	-0.33689055	-1.1477523	0.2637131	0.45379534	1
KEGG_GALACTOSE_METABOLISM	-0.42945576	-1.1418017	0.28483605	0.45452213	1
BIOCARTA_RACCYCD_PATHWAY	0.40875345	1.0804816	0.38973385	0.4551636	1
REACTOME_RNA_POL_III_TRANSCRIPTION	0.30959028	1.0812095	0.36	0.45519733	1
REACTOME_SIGNALING_BY_INSULIN_RECEPTOR	0.27770472	1.0795636	0.33663365	0.4553064	1
REACTOME_XENOBIOTICS	-0.42260954	-1.1419533	0.35576922	0.45574677	1
REACTOME_ACTIVATED_POINT_MUTANTS_OF_FGFR2	-0.43132767	-1.142437	0.3319672	0.4564923	1
REACTOME_ACTIVATION_OF_GENES_BY_ATF4	0.4238581	1.0779063	0.39517626	0.45657238	1
BIOCARTA_AKT_PATHWAY	-0.45684713	-1.1394925	0.30532786	0.45699564	1
REACTOME_MHC_CLASS_II_ANTIGEN_PRESENTATION	0.34975824	1.0745151	0.38610038	0.458211	1
BIOCARTA_IL17_PATHWAY	-0.43340054	-1.1373701	0.31976745	0.45877287	1
KEGG_WNT_SIGNALING_PATHWAY	0.26688597	1.0746647	0.33333334	0.45905754	1
REACTOME_SIGNAL_TRANSDUCTION_BY_L1	0.32444966	1.0753648	0.36713997	0.45920596	1
REACTOME_AXON_GUIDANCE	0.2753072	1.0728499	0.36486486	0.4596076	1
REACTOME_CREB_PHOSPHORYLATION_THROUGH_THE_ACTIVATION_OF_CAMKII	-0.45894513	-1.1351161	0.3483366	0.46094453	1
BIOCARTA_PML_PATHWAY	0.34332156	1.070604	0.37330756	0.46186715	1
REACTOME_NFKB_ACTIVATION_THROUGH_FADD_RIP1_PATHWAY_MEDIATED_BY_CASPASE_8_AND10	0.38872442	1.0691806	0.36561266	0.46282306	1
REACTOME_THE_ROLE_OF_NEF_IN_HIV1_REPLICATION_AND_DISEASE_PATHOGENESIS	0.40653512	1.068025	0.40836653	0.4634835	1
REACTOME_G_ALPHA1213_SIGNALLING_EVENTS	-0.31921405	-1.1257678	0.29817444	0.46566203	1
REACTOME_NGF_SIGNALLING_VIA_TRKA_FROM_THE_PLASMA_MEMBRANE	-0.30511847	-1.1260391	0.27935222	0.4667243	1
BIOCARTA_MYOSIN_PATHWAY	-0.32755262	-1.1304513	0.2890625	0.46678662	1
KEGG_AXON_GUIDANCE	-0.27197808	-1.1295222	0.2718053	0.46688384	1
KEGG_PROSTATE_CANCER	0.2832689	1.0641042	0.34380776	0.46790275	1
REACTOME_INTERACTION_BETWEEN_L1_AND_ANKYRINS	-0.3958858	-1.1260626	0.3504762	0.46815297	1
REACTOME_TRAF6_MEDIATED_INDUCTION_OF_TAK1_COMPLEX	-0.503532	-1.1272621	0.311412	0.46916038	1
BIOCARTA_GABA_PATHWAY	-0.41145077	-1.1262571	0.3243243	0.4693137	1
BIOCARTA_AKAPCENTROSOME_PATHWAY	-0.5221639	-1.1175846	0.35952848	0.47281784	1
REACTOME_FACTORS_INVOLVED_IN_MEGAKARYOCYTE_DEVELOPMENT_AND_PLATELET_PRODUCTION	-0.30735105	-1.1177164	0.27027026	0.47409707	1
REACTOME_KERATAN_SULFATE_KERATIN_METABOLISM	-0.39680925	-1.1158259	0.3095723	0.4742084	1
REACTOME_SYNTHESIS_SECRETION_AND_INACTIVATION_OF_GLP1	-0.48687643	-1.1190258	0.2891089	0.47496095	1
BIOCARTA_PLATELETAPP_PATHWAY	-0.39614838	-1.1177874	0.32673267	0.47543266	1
KEGG_HEDGEHOG_SIGNALING_PATHWAY	-0.29799145	-1.1129087	0.32629558	0.47739515	1
REACTOME_PLATELET_ACTIVATION_SIGNALING_AND_AGGREGATION	-0.35346255	-1.1098	0.33128834	0.48092452	1
REACTOME_MEMBRANE_BINDING_AND_TARGETTING_OF_GAG_PROTEINS	0.5415761	1.054279	0.42454728	0.48099008	1
KEGG_GLYCOSAMINOGLYCAN_BIOSYNTHESIS_CHONDROITIN_SULFATE	0.3824904	1.0523578	0.40642723	0.48250526	1
REACTOME_HIGHLY_CALCIUM_PERMEABLE_POSTSYNAPTIC_NICOTINIC_ACETYLCHOLINE_RECEPTORS	-0.43657216	-1.1069754	0.35247526	0.48395237	1
REACTOME_REVERSIBLE_HYDRATION_OF_CARBON_DIOXIDE	0.4178476	1.0487647	0.37642586	0.48430207	1
KEGG_AUTOIMMUNE_THYROID_DISEASE	0.38831824	1.049359	0.41851106	0.48456097	1
KEGG_CARDIAC_MUSCLE_CONTRACTION	0.3706292	1.0494971	0.41247484	0.48547482	1
REACTOME_MYD88_MAL_CASCADE_INITIATED_ON_PLASMA_MEMBRANE	-0.28804404	-1.1021943	0.3272727	0.48570132	1
KEGG_PEROXISOME	-0.37695512	-1.102921	0.3467433	0.4859791	1
REACTOME_NEUROTRANSMITTER_RECEPTOR_BINDING_AND_DOWNSTREAM_TRANSMISSION_IN_THE_POSTSYNAPTIC_CELL	-0.26033995	-1.1033716	0.3690476	0.48671076	1
BIOCARTA_TOB1_PATHWAY	-0.40131968	-1.1034105	0.3234127	0.48810306	1
REACTOME_DIABETES_PATHWAYS	0.30379242	1.0437789	0.40425533	0.48833472	1
KEGG_FC_GAMMA_R_MEDIATED_PHAGOCYTOSIS	-0.28048247	-1.097572	0.31578946	0.48868576	1
REACTOME_NCAM_SIGNALING_FOR_NEURITE_OUT_GROWTH	0.33502632	1.0442098	0.4194831	0.48884115	1
KEGG_OTHER_GLYCAN_DEGRADATION	0.4075915	1.0447444	0.4090909	0.48914587	1
KEGG_ACUTE_MYELOID_LEUKEMIA	-0.2821141	-1.0981874	0.32310838	0.48915297	1
KEGG_CALCIUM_SIGNALING_PATHWAY	-0.2679455	-1.0986995	0.3647059	0.48969156	1
KEGG_CHRONIC_MYELOID_LEUKEMIA	0.27119866	1.0411006	0.40337712	0.49012512	1
REACTOME_GLUCONEOGENESIS	-0.4292349	-1.0948651	0.34774068	0.49014306	1
KEGG_FC_EPSILON_RI_SIGNALING_PATHWAY	-0.2798587	-1.0956633	0.32713756	0.49026313	1
KEGG_GLYCOSAMINOGLYCAN_BIOSYNTHESIS_KERATAN_SULFATE	0.40513018	1.0416274	0.4096154	0.4904159	1
BIOCARTA_INFLAM_PATHWAY	-0.3942547	-1.0925084	0.38310412	0.49083224	1
BIOCARTA_GATA3_PATHWAY	-0.50608724	-1.0933158	0.3467742	0.4910283	1
REACTOME_RAP1_SIGNALLING	0.42816275	1.038932	0.4311377	0.49215338	1
KEGG_HUNTINGTONS_DISEASE	0.4338223	1.0372292	0.47878787	0.49241248	1
BIOCARTA_MTOR_PATHWAY	0.43509558	1.0373377	0.44639376	0.4934031	1
REACTOME_INTEGRIN_CELL_SURFACE_INTERACTIONS	0.35164616	1.0355814	0.42023346	0.49369076	1
REACTOME_RETROGRADE_NEUROTROPHIN_SIGNALLING	0.4045863	1.0333827	0.42828685	0.49573863	1
REACTOME_TOLL_RECEPTOR_CASCADES	-0.27406788	-1.0862955	0.34393638	0.49931106	1
KEGG_ASTHMA	0.37394264	1.0279922	0.40803382	0.50225097	1
KEGG_LEISHMANIA_INFECTION	-0.33714193	-1.0832843	0.3821138	0.50285405	1
BIOCARTA_TFF_PATHWAY	-0.43943393	-1.0821961	0.38617885	0.50318867	1
REACTOME_FGFR1_LIGAND_BINDING_AND_ACTIVATION	-0.4108399	-1.080935	0.40451744	0.5037662	1
REACTOME_SOS_MEDIATED_SIGNALLING	0.42391503	1.0244812	0.45559844	0.5061859	1
BIOCARTA_PTDINS_PATHWAY	0.36575967	1.0235927	0.43503937	0.5064295	1
REACTOME_SEMA3A_PAK_DEPENDENT_AXON_REPULSION	0.4355019	1.0219384	0.45	0.5077585	1
BIOCARTA_VDR_PATHWAY	0.41134745	1.0204425	0.4631783	0.5088794	1
KEGG_APOPTOSIS	0.26607475	1.0190756	0.4446602	0.509821	1
KEGG_HYPERTROPHIC_CARDIOMYOPATHY_HCM	-0.28514582	-1.0751966	0.36790606	0.51170766	1
REACTOME_GOLGI_ASSOCIATED_VESICLE_BIOGENESIS	0.37218288	1.0158523	0.47876447	0.5135219	1
REACTOME_IRAK2_MEDIATED_ACTIVATION_OF_TAK1_COMPLEX_UPON_TLR7_8_OR_9_STIMULATION	0.4946291	1.0144557	0.4755102	0.51455593	1
REACTOME_ERK_MAPK_TARGETS	0.35171172	1.0127845	0.46783626	0.5158504	1
KEGG_VASOPRESSIN_REGULATED_WATER_REABSORPTION	0.32640842	1.0111332	0.45719844	0.51707673	1
BIOCARTA_FIBRINOLYSIS_PATHWAY	0.49331912	1.0086496	0.52362204	0.5195177	1
KEGG_FRUCTOSE_AND_MANNOSE_METABOLISM	-0.37645543	-1.0688148	0.39183673	0.5207055	1
REACTOME_ABACAVIR_TRANSPORT_AND_METABOLISM	-0.48308277	-1.0658427	0.38493723	0.52412295	1
BIOCARTA_GLYCOLYSIS_PATHWAY	0.5310815	1.0044385	0.52156866	0.5245302	1
REACTOME_RIG_I_MDA5_MEDIATED_INDUCTION_OF_IFN_ALPHA_BETA_PATHWAYS	0.2756745	1.0034664	0.45816734	0.5248189	1
BIOCARTA_AKAP95_PATHWAY	-0.525803	-1.0637872	0.43503937	0.5259346	1
KEGG_SPHINGOLIPID_METABOLISM	-0.32807812	-1.0623649	0.369863	0.5267698	1
BIOCARTA_ERK_PATHWAY	-0.35512286	-1.0613474	0.3825911	0.5269696	1
REACTOME_OXYGEN_DEPENDENT_PROLINE_HYDROXYLATION_OF_HYPOXIA_INDUCIBLE_FACTOR_ALPHA	0.4667542	1.0002655	0.50292397	0.5281179	1
REACTOME_YAP1_AND_WWTR1_TAZ_STIMULATED_GENE_EXPRESSION	-0.31648308	-1.0585476	0.37209302	0.52825385	1
REACTOME_SYNTHESIS_OF_PIPS_AT_THE_LATE_ENDOSOME_MEMBRANE	0.4298692	0.9990588	0.49514562	0.52873486	1
BIOCARTA_IL4_PATHWAY	-0.4459429	-1.0590926	0.40408164	0.5289022	1
BIOCARTA_BARRESTIN_PATHWAY	0.48003778	0.99805903	0.53688526	0.52904236	1
REACTOME_SIGNALLING_BY_NGF	0.26100415	0.9967434	0.4730769	0.5297619	1
BIOCARTA_STRESS_PATHWAY	-0.33255777	-1.0566673	0.375	0.52987623	1
KEGG_GLIOMA	-0.2550459	-1.0556217	0.35714287	0.5299485	1
BIOCARTA_GCR_PATHWAY	-0.46058628	-1.0499842	0.425	0.5355896	1
KEGG_NITROGEN_METABOLISM	-0.34727976	-1.0488851	0.4105691	0.5359257	1
REACTOME_PRESYNAPTIC_NICOTINIC_ACETYLCHOLINE_RECEPTORS	-0.4196199	-1.0505545	0.46845123	0.5361832	1
REACTOME_SIGNALING_BY_EGFR_IN_CANCER	-0.29761034	-1.0430082	0.38617885	0.53635806	1
REACTOME_ADVANCED_GLYCOSYLATION_ENDPRODUCT_RECEPTOR_SIGNALING	0.4580628	0.9896757	0.5116279	0.53649855	1
REACTOME_MRNA_DECAY_BY_5_TO_3_EXORIBONUCLEASE	0.42308205	0.9911567	0.5088757	0.5368153	1
BIOCARTA_DC_PATHWAY	-0.40215972	-1.046461	0.44401544	0.53686297	1
REACTOME_REGULATION_OF_INSULIN_LIKE_GROWTH_FACTOR_IGF_ACTIVITY_BY_INSULIN_LIKE_GROWTH_FACTOR_BINDING_PROTEINS_IGFBPS	-0.45262474	-1.043613	0.40882918	0.5368722	1
REACTOME_INNATE_IMMUNE_SYSTEM	-0.2821493	-1.0450839	0.39419088	0.5373565	1
KEGG_ADHERENS_JUNCTION	-0.28661472	-1.0441477	0.38787878	0.5375122	1
REACTOME_ACETYLCHOLINE_BINDING_AND_DOWNSTREAM_EVENTS	-0.40991926	-1.0469021	0.4472169	0.5376072	1
REACTOME_NCAM1_INTERACTIONS	0.37878266	0.9896989	0.49607843	0.5376252	1
BIOCARTA_TALL1_PATHWAY	0.39056513	0.9879306	0.481409	0.53793633	1
REACTOME_FRS2_MEDIATED_CASCADE	0.2892023	0.98633194	0.4826923	0.5389453	1
REACTOME_IL_2_SIGNALING	-0.30314785	-1.0380384	0.38955823	0.54117894	1
BIOCARTA_IL12_PATHWAY	-0.35264254	-1.0389822	0.42884615	0.5412107	1
REACTOME_PI_3K_CASCADE	-0.28586483	-1.0356889	0.4016227	0.543423	1
REACTOME_SIGNAL_REGULATORY_PROTEIN_SIRP_FAMILY_INTERACTIONS	0.35818276	0.9824161	0.48080808	0.54347867	1
REACTOME_POST_CHAPERONIN_TUBULIN_FOLDING_PATHWAY	0.5181759	0.98047984	0.5163776	0.54503614	1
REACTOME_NFKB_IS_ACTIVATED_AND_SIGNALS_SURVIVAL	0.41638586	0.9756695	0.51	0.54955405	1
KEGG_OXIDATIVE_PHOSPHORYLATION	0.44928867	0.9762743	0.53614455	0.5498227	1
KEGG_TOLL_LIKE_RECEPTOR_SIGNALING_PATHWAY	-0.2806306	-1.0285741	0.43700787	0.553301	1
KEGG_ARGININE_AND_PROLINE_METABOLISM	-0.38490826	-1.0272918	0.44032922	0.5536652	1
KEGG_OLFACTORY_TRANSDUCTION	-0.27797708	-1.0231109	0.43564355	0.55451554	1
REACTOME_SULFUR_AMINO_ACID_METABOLISM	-0.3966207	-1.0235475	0.44147843	0.55522907	1
REACTOME_LIGAND_GATED_ION_CHANNEL_TRANSPORT	-0.37112463	-1.0238762	0.46544716	0.5562099	1
REACTOME_PEROXISOMAL_LIPID_METABOLISM	-0.42864507	-1.0244645	0.4507874	0.5567814	1
BIOCARTA_CERAMIDE_PATHWAY	0.32078588	0.96875834	0.4979253	0.5570633	1
REACTOME_SIGNALING_BY_SCF_KIT	0.26228142	0.969302	0.496139	0.5574535	1
BIOCARTA_FREE_PATHWAY	-0.48577812	-1.018406	0.45506692	0.55907875	1
REACTOME_FORMATION_OF_INCISION_COMPLEX_IN_GG_NER	0.328083	0.9664252	0.50687623	0.5593032	1
REACTOME_ERKS_ARE_INACTIVATED	0.41930065	0.96548235	0.5234375	0.5594116	1
KEGG_DILATED_CARDIOMYOPATHY	-0.26950866	-1.0184567	0.4138614	0.56049436	1
BIOCARTA_AMI_PATHWAY	-0.4219918	-1.015079	0.45194274	0.5614648	1
REACTOME_TRIF_MEDIATED_TLR3_SIGNALING	-0.27060962	-1.0158021	0.41365463	0.5618448	1
REACTOME_TRANS_GOLGI_NETWORK_VESICLE_BUDDING	0.33573633	0.9616061	0.53592235	0.564123	1
REACTOME_SYNTHESIS_OF_GLYCOSYLPHOSPHATIDYLINOSITOL_GPI	0.35874957	0.9589372	0.50199205	0.5668189	1
BIOCARTA_RELA_PATHWAY	0.2946528	0.95763135	0.49902913	0.56761944	1
BIOCARTA_CD40_PATHWAY	-0.34532332	-1.0059077	0.4110672	0.5699676	1
KEGG_TGF_BETA_SIGNALING_PATHWAY	-0.29785278	-1.0083497	0.4409938	0.5706009	1
REACTOME_REGULATION_OF_COMPLEMENT_CASCADE	-0.53452927	-1.0061897	0.47835052	0.57101995	1
KEGG_FOCAL_ADHESION	-0.29858345	-1.0070742	0.43632567	0.57114685	1
REACTOME_SIGNALING_BY_FGFR3_MUTANTS	-0.3987685	-1.0002763	0.48870638	0.5741398	1
BIOCARTA_NFKB_PATHWAY	-0.29777822	-1.0012709	0.47227535	0.57557684	1
REACTOME_GABA_A_RECEPTOR_ACTIVATION	-0.4084496	-1.0003111	0.48790324	0.57558894	1
BIOCARTA_HCMV_PATHWAY	-0.31983396	-0.997204	0.4586614	0.5761235	1
KEGG_CHEMOKINE_SIGNALING_PATHWAY	-0.2506663	-0.99797815	0.4398422	0.5763223	1
REACTOME_GLYCOLYSIS	-0.4260231	-0.99551284	0.47560975	0.5771789	1
KEGG_NATURAL_KILLER_CELL_MEDIATED_CYTOTOXICITY	0.23834854	0.94738007	0.518591	0.5777976	1
KEGG_SNARE_INTERACTIONS_IN_VESICULAR_TRANSPORT	0.29824418	0.94771737	0.5254583	0.5784685	1
REACTOME_TRANSPORT_TO_THE_GOLGI_AND_SUBSEQUENT_MODIFICATION	0.32129148	0.9482865	0.5440613	0.5788534	1
REACTOME_CD28_CO_STIMULATION	-0.28750542	-0.9933917	0.46966732	0.5790082	1
KEGG_PARKINSONS_DISEASE	0.44939557	0.9488165	0.55445546	0.5793117	1
REACTOME_REGULATION_OF_AMPK_ACTIVITY_VIA_LKB1	0.31177425	0.93877465	0.5463511	0.5853566	1
REACTOME_PECAM1_INTERACTIONS	0.40346947	0.93879426	0.5694716	0.58654565	1
REACTOME_TRAF6_MEDIATED_INDUCTION_OF_NFKB_AND_MAP_KINASES_UPON_TLR7_8_OR_9_ACTIVATION	-0.26571646	-0.98758906	0.4642127	0.5867977	1
KEGG_TERPENOID_BACKBONE_BIOSYNTHESIS	0.44049197	0.9394654	0.56978965	0.58681273	1
REACTOME_COSTIMULATION_BY_THE_CD28_FAMILY	0.26687792	0.939617	0.5482546	0.58778876	1
REACTOME_SIGNALING_BY_RHO_GTPASES	0.26204768	0.9351563	0.5590551	0.58967495	1
KEGG_GLYCOSYLPHOSPHATIDYLINOSITOL_GPI_ANCHOR_BIOSYNTHESIS	0.32490653	0.9338928	0.54	0.59023714	1
KEGG_AMINO_SUGAR_AND_NUCLEOTIDE_SUGAR_METABOLISM	-0.3562703	-0.9835348	0.49598393	0.59052366	1
REACTOME_GABA_SYNTHESIS_RELEASE_REUPTAKE_AND_DEGRADATION	-0.34135076	-0.9805789	0.47433266	0.59056187	1
REACTOME_PRE_NOTCH_EXPRESSION_AND_PROCESSING	-0.27550414	-0.9837533	0.4632653	0.59164953	1
REACTOME_NETRIN1_SIGNALING	-0.27828324	-0.9807357	0.4851695	0.5918012	1
REACTOME_BMAL1_CLOCK_NPAS2_ACTIVATES_CIRCADIAN_EXPRESSION	-0.27328846	-0.9812298	0.51028806	0.5925442	1
REACTOME_SEMAPHORIN_INTERACTIONS	-0.2939619	-0.97747487	0.505071	0.5941384	1
REACTOME_PASSIVE_TRANSPORT_BY_AQUAPORINS	-0.3885838	-0.97092706	0.49330783	0.5953435	1
KEGG_DRUG_METABOLISM_OTHER_ENZYMES	0.30194873	0.92964315	0.5862069	0.595402	1
REACTOME_REGULATION_OF_RHEB_GTPASE_ACTIVITY_BY_AMPK	-0.3528503	-0.9660662	0.50395256	0.5954094	1
KEGG_MELANOMA	-0.2571048	-0.9716478	0.4945534	0.5956136	1
REACTOME_BETA_DEFENSINS	0.46548218	0.9286843	0.5686654	0.5956247	1
REACTOME_RESPONSE_TO_ELEVATED_PLATELET_CYTOSOLIC_CA2_	-0.40879667	-0.96955466	0.52156055	0.59610355	1
BIOCARTA_HDAC_PATHWAY	-0.30817464	-0.972266	0.49473685	0.59614646	1
REACTOME_PEPTIDE_HORMONE_BIOSYNTHESIS	-0.45054492	-0.9663302	0.52095807	0.5964786	1
KEGG_BASAL_CELL_CARCINOMA	-0.26992866	-0.96701413	0.5119048	0.59689325	1
BIOCARTA_ARF_PATHWAY	0.36277324	0.9269139	0.5799615	0.5969906	1
REACTOME_SEMA4D_IN_SEMAPHORIN_SIGNALING	-0.3470311	-0.9725682	0.5146443	0.5971999	1
KEGG_REGULATION_OF_ACTIN_CYTOSKELETON	-0.2532913	-0.9675587	0.5103735	0.5976989	1
KEGG_B_CELL_RECEPTOR_SIGNALING_PATHWAY	-0.2564142	-0.97278404	0.51129365	0.59837687	1
KEGG_HEMATOPOIETIC_CELL_LINEAGE	-0.26576388	-0.97321254	0.48221344	0.59915113	1
REACTOME_EXTRINSIC_PATHWAY_FOR_APOPTOSIS	0.32191083	0.9235984	0.53579175	0.60045505	1
REACTOME_ACTIVATION_OF_IRF3_IRF7_MEDIATED_BY_TBK1_IKK_EPSILON	-0.4111782	-0.9592382	0.52747256	0.6046402	1
REACTOME_SIGNALING_BY_PDGF	-0.2976336	-0.95656985	0.53112036	0.6058284	1
BIOCARTA_BCELLSURVIVAL_PATHWAY	-0.38630605	-0.9574316	0.5281125	0.60605824	1
REACTOME_REGULATION_OF_INSULIN_SECRETION_BY_ACETYLCHOLINE	0.32191348	0.9179439	0.5652174	0.6071666	1
KEGG_GAP_JUNCTION	-0.2665711	-0.953894	0.5091278	0.6086443	1
KEGG_NON_SMALL_CELL_LUNG_CANCER	0.22414024	0.915724	0.5857418	0.6090641	1
REACTOME_DIGESTION_OF_DIETARY_CARBOHYDRATE	0.56032246	0.91312253	0.62103176	0.60908765	1
REACTOME_SPHINGOLIPID_METABOLISM	0.26024482	0.91485685	0.6039604	0.60911804	1
BIOCARTA_NKCELLS_PATHWAY	0.38788185	0.9133545	0.58925146	0.61003625	1
KEGG_LEUKOCYTE_TRANSENDOTHELIAL_MIGRATION	-0.26229396	-0.9509907	0.52079207	0.610268	1
KEGG_PANCREATIC_CANCER	-0.2544906	-0.9515588	0.52	0.6108617	1
KEGG_MELANOGENESIS	-0.23505728	-0.9495298	0.53361344	0.6109864	1
REACTOME_PI3K_AKT_ACTIVATION	-0.3295008	-0.9484413	0.54037267	0.6111944	1
REACTOME_PI_METABOLISM	0.24634862	0.90698427	0.56981134	0.6132234	1
KEGG_LONG_TERM_POTENTIATION	0.22738814	0.9071715	0.60192305	0.6141214	1
REACTOME_PYRIMIDINE_METABOLISM	0.32178092	0.9047759	0.6086066	0.61515284	1
REACTOME_G1_PHASE	0.34255794	0.9072942	0.6111111	0.61523235	1
REACTOME_AMINO_ACID_SYNTHESIS_AND_INTERCONVERSION_TRANSAMINATION	0.36827004	0.9075815	0.5947581	0.6160311	1
KEGG_ERBB_SIGNALING_PATHWAY	-0.21397328	-0.94016105	0.5469062	0.6182104	1
REACTOME_METABOLISM_OF_VITAMINS_AND_COFACTORS	-0.2976029	-0.94057584	0.54303277	0.6190692	1
REACTOME_CTLA4_INHIBITORY_SIGNALING	-0.3040822	-0.9407096	0.5409182	0.620319	1
REACTOME_KERATAN_SULFATE_DEGRADATION	-0.49634776	-0.93764645	0.57261413	0.62062216	1
BIOCARTA_CHREBP2_PATHWAY	-0.34060964	-0.9414126	0.5421687	0.6207029	1
REACTOME_METABOLISM_OF_AMINO_ACIDS_AND_DERIVATIVES	0.3088247	0.8993287	0.61417323	0.6220948	1
REACTOME_CHEMOKINE_RECEPTORS_BIND_CHEMOKINES	0.29636165	0.89773303	0.6193294	0.6232875	1
KEGG_ALZHEIMERS_DISEASE	0.34651914	0.89561325	0.61	0.62519383	1
REACTOME_INTEGRIN_ALPHAIIB_BETA3_SIGNALING	0.3492008	0.8946652	0.60714287	0.62529165	1
KEGG_GLUTATHIONE_METABOLISM	-0.37315735	-0.93131137	0.5383104	0.62761134	1
BIOCARTA_ATM_PATHWAY	-0.27714205	-0.9318118	0.5683168	0.62832254	1
REACTOME_GLUTAMATE_NEUROTRANSMITTER_RELEASE_CYCLE	-0.31148	-0.9242788	0.5413223	0.6355497	1
BIOCARTA_SODD_PATHWAY	-0.36263755	-0.92306244	0.5415861	0.6359483	1
REACTOME_SIGNALING_BY_FGFR1_MUTANTS	-0.2739602	-0.92457515	0.56790125	0.6365537	1
BIOCARTA_CCR3_PATHWAY	-0.30988362	-0.9191321	0.5750988	0.6406179	1
REACTOME_TAK1_ACTIVATES_NFKB_BY_PHOSPHORYLATION_AND_ACTIVATION_OF_IKKS_COMPLEX	0.24995227	0.8823243	0.6316832	0.64067024	1
REACTOME_RIP_MEDIATED_NFKB_ACTIVATION_VIA_DAI	0.28471288	0.8826616	0.5918762	0.6414406	1
REACTOME_PKB_MEDIATED_EVENTS	0.25652325	0.8803845	0.6315789	0.6422898	1
REACTOME_COLLAGEN_FORMATION	-0.38694698	-0.9167164	0.58350515	0.6428126	1
REACTOME_PLATELET_CALCIUM_HOMEOSTASIS	-0.34361237	-0.9108863	0.56782943	0.65048605	1
BIOCARTA_IL5_PATHWAY	-0.39083624	-0.9072995	0.6064257	0.6545454	1
REACTOME_SPHINGOLIPID_DE_NOVO_BIOSYNTHESIS	-0.32439363	-0.9027039	0.5917526	0.6571824	1
KEGG_COLORECTAL_CANCER	-0.27078912	-0.9043186	0.5904366	0.65765536	1
REACTOME_PIP3_ACTIVATES_AKT_SIGNALING	-0.28359145	-0.903174	0.5884774	0.6579415	1
REACTOME_SIGNALING_BY_FGFR1_FUSION_MUTANTS	0.29803428	0.8677558	0.665392	0.65924335	1
BIOCARTA_ACTINY_PATHWAY	0.37939408	0.8666493	0.64158416	0.65961	1
REACTOME_OPSINS	0.43021894	0.86489856	0.6498994	0.6608527	1
REACTOME_PI3K_CASCADE	-0.23538725	-0.89898044	0.6059406	0.6615192	1
REACTOME_SPRY_REGULATION_OF_FGF_SIGNALING	0.36464489	0.86199254	0.6537678	0.66250557	1
REACTOME_UNBLOCKING_OF_NMDA_RECEPTOR_GLUTAMATE_BINDING_AND_ACTIVATION	0.35421857	0.8628762	0.61122245	0.6625428	1
KEGG_RENAL_CELL_CARCINOMA	0.23821074	0.8608719	0.6349515	0.6627881	1
KEGG_VEGF_SIGNALING_PATHWAY	0.21612792	0.85903883	0.67695475	0.6629047	1
REACTOME_NEGATIVE_REGULATION_OF_FGFR_SIGNALING	-0.26342887	-0.89681846	0.62096775	0.66341704	1
REACTOME_N_GLYCAN_ANTENNAE_ELONGATION_IN_THE_MEDIAL_TRANS_GOLGI	0.28854385	0.85931724	0.6316832	0.663707	1
REACTOME_NEGATIVE_REGULATION_OF_THE_PI3K_AKT_NETWORK	-0.39427513	-0.8949966	0.5908142	0.66465133	1
BIOCARTA_NKT_PATHWAY	-0.275144	-0.890884	0.5954198	0.66978633	1
BIOCARTA_FMLP_PATHWAY	-0.24959514	-0.8893157	0.60588235	0.67077947	1
KEGG_MATURITY_ONSET_DIABETES_OF_THE_YOUNG	-0.2964531	-0.8873571	0.6303502	0.6723649	1
BIOCARTA_MPR_PATHWAY	-0.36454862	-0.883688	0.62729126	0.67650557	1
REACTOME_FGFR_LIGAND_BINDING_AND_ACTIVATION	-0.3053563	-0.8817126	0.6270161	0.67652225	1
BIOCARTA_UCALPAIN_PATHWAY	-0.30183837	-0.88179415	0.6204819	0.67793757	1
REACTOME_INWARDLY_RECTIFYING_K_CHANNELS	-0.25460497	-0.87855643	0.6200417	0.6799742	1
REACTOME_SIGNALING_BY_HIPPO	-0.34577674	-0.8770663	0.6369168	0.68067306	1
REACTOME_IL1_SIGNALING	0.22832108	0.8455892	0.6838095	0.6812574	1
REACTOME_RESPIRATORY_ELECTRON_TRANSPORT_ATP_SYNTHESIS_BY_CHEMIOSMOTIC_COUPLING_AND_HEAT_PRODUCTION_BY_UNCOUPLING_PROTEINS_	0.4371581	0.8424573	0.6533865	0.68457556	1
REACTOME_ANDROGEN_BIOSYNTHESIS	-0.38949713	-0.8723325	0.6076923	0.68503094	1
REACTOME_PRE_NOTCH_TRANSCRIPTION_AND_TRANSLATION	-0.29955366	-0.8725951	0.64377683	0.6861802	1
REACTOME_TRYPTOPHAN_CATABOLISM	0.39557776	0.83770466	0.69456065	0.6900712	1
BIOCARTA_ASBCELL_PATHWAY	-0.35560697	-0.86645657	0.6396917	0.6911646	1
BIOCARTA_LYM_PATHWAY	-0.38428605	-0.86740965	0.63564354	0.6912084	1
REACTOME_IRON_UPTAKE_AND_TRANSPORT	0.32475477	0.8339639	0.6966068	0.6928348	1
KEGG_VALINE_LEUCINE_AND_ISOLEUCINE_BIOSYNTHESIS	0.35029936	0.8348676	0.68537074	0.6928645	1
REACTOME_EGFR_DOWNREGULATION	0.29522616	0.829573	0.7162978	0.69759005	1
REACTOME_ROLE_OF_SECOND_MESSENGERS_IN_NETRIN1_SIGNALING	-0.37834796	-0.8598001	0.64950496	0.6999438	1
KEGG_PHOSPHATIDYLINOSITOL_SIGNALING_SYSTEM	0.1958589	0.82260406	0.77110696	0.70631325	1
REACTOME_SHC_MEDIATED_CASCADE	-0.26454392	-0.8545366	0.6694045	0.7066711	1
REACTOME_CD28_DEPENDENT_VAV1_PATHWAY	-0.3286175	-0.8514174	0.66871166	0.7068546	1
BIOCARTA_EXTRINSIC_PATHWAY	-0.40545577	-0.85343146	0.67617106	0.70687306	1
REACTOME_GLUCURONIDATION	-0.48526523	-0.8520718	0.6653144	0.7073545	1
KEGG_T_CELL_RECEPTOR_SIGNALING_PATHWAY	-0.20279738	-0.84757507	0.7085828	0.7112346	1
BIOCARTA_PTEN_PATHWAY	-0.3262268	-0.84587646	0.68049794	0.7121478	1
KEGG_NEUROTROPHIN_SIGNALING_PATHWAY	0.20124659	0.8147096	0.75435203	0.71511793	1
REACTOME_GLYCOSPHINGOLIPID_METABOLISM	0.25289887	0.813592	0.7693878	0.7154505	1
REACTOME_SYNTHESIS_OF_PIPS_AT_THE_PLASMA_MEMBRANE	0.23347239	0.8147714	0.68703705	0.71638125	1
REACTOME_SEMA4D_INDUCED_CELL_MIGRATION_AND_GROWTH_CONE_COLLAPSE	-0.3128359	-0.8390809	0.66527194	0.72098494	1
REACTOME_DOWNREGULATION_OF_ERBB2_ERBB3_SIGNALING	0.28553233	0.8081616	0.7075099	0.7222041	1
REACTOME_CS_DS_DEGRADATION	0.36962262	0.8062146	0.73493975	0.7238406	1
REACTOME_DSCAM_INTERACTIONS	0.29150897	0.8043041	0.7358871	0.7239247	1
KEGG_CYTOSOLIC_DNA_SENSING_PATHWAY	0.22719385	0.8051782	0.72064775	0.72397786	1
REACTOME_OTHER_SEMAPHORIN_INTERACTIONS	-0.2794923	-0.83506984	0.6633858	0.72582704	1
BIOCARTA_VEGF_PATHWAY	0.2666103	0.8014309	0.734252	0.72682595	1
BIOCARTA_BLYMPHOCYTE_PATHWAY	0.35859564	0.7991626	0.6817289	0.7273148	1
BIOCARTA_IGF1MTOR_PATHWAY	0.30145708	0.80006766	0.73663366	0.7273855	1
BIOCARTA_ACH_PATHWAY	0.26740593	0.7905138	0.76208895	0.73700696	1
REACTOME_HOMOLOGOUS_RECOMBINATION_REPAIR_OF_REPLICATION_INDEPENDENT_DOUBLE_STRAND_BREAKS	0.2571718	0.79130054	0.7237569	0.7372604	1
KEGG_AMYOTROPHIC_LATERAL_SCLEROSIS_ALS	-0.2512895	-0.82337403	0.7234469	0.74232924	1
REACTOME_N_GLYCAN_ANTENNAE_ELONGATION	0.27768803	0.78118384	0.765873	0.7490575	1
REACTOME_REGULATION_OF_IFNG_SIGNALING	-0.33650944	-0.8169527	0.67820776	0.74911314	1
REACTOME_PLATELET_ADHESION_TO_EXPOSED_COLLAGEN	-0.38267967	-0.81763625	0.7084189	0.7496749	1
KEGG_INTESTINAL_IMMUNE_NETWORK_FOR_IGA_PRODUCTION	-0.27019387	-0.8138482	0.72200775	0.7523462	1
KEGG_INOSITOL_PHOSPHATE_METABOLISM	0.20542723	0.7765324	0.8093458	0.7541413	1
REACTOME_INSULIN_RECEPTOR_SIGNALLING_CASCADE	0.19987977	0.7748417	0.8231827	0.7551793	1
REACTOME_TGF_BETA_RECEPTOR_SIGNALING_ACTIVATES_SMADS	0.31020015	0.77173144	0.7721022	0.75806934	1
REACTOME_TRAF6_MEDIATED_IRF7_ACTIVATION	-0.26449865	-0.8070181	0.6909789	0.7610183	1
REACTOME_TGF_BETA_RECEPTOR_SIGNALING_IN_EMT_EPITHELIAL_TO_MESENCHYMAL_TRANSITION	-0.35301915	-0.80453736	0.7072165	0.76321065	1
KEGG_CYSTEINE_AND_METHIONINE_METABOLISM	-0.30128267	-0.8010524	0.76	0.7636151	1
REACTOME_NEPHRIN_INTERACTIONS	-0.29274252	-0.80190414	0.72141373	0.76386917	1
BIOCARTA_TCRA_PATHWAY	0.35718012	0.76655996	0.73195875	0.7640701	1
REACTOME_ORGANIC_CATION_ANION_ZWITTERION_TRANSPORT	-0.3051897	-0.7972296	0.7426326	0.76433307	1
REACTOME_SMOOTH_MUSCLE_CONTRACTION	-0.33699596	-0.79833186	0.68514854	0.7643383	1
REACTOME_SIGNALING_BY_FGFR_MUTANTS	-0.2204904	-0.7962103	0.7625	0.76442885	1
BIOCARTA_RARRXR_PATHWAY	-0.27159917	-0.8022619	0.7310757	0.7649711	1
KEGG_GLYCOSAMINOGLYCAN_DEGRADATION	-0.25138533	-0.79849666	0.7980952	0.76576966	1
REACTOME_ACYL_CHAIN_REMODELLING_OF_PG	-0.31078446	-0.7933465	0.7822581	0.7669103	1
BIOCARTA_MAL_PATHWAY	-0.27164477	-0.7882268	0.7736944	0.77151996	1
REACTOME_SEROTONIN_RECEPTORS	-0.28142297	-0.7884978	0.6989899	0.7727333	1
REACTOME_TANDEM_PORE_DOMAIN_POTASSIUM_CHANNELS	0.36982873	0.7578184	0.8004158	0.7749326	1
REACTOME_P130CAS_LINKAGE_TO_MAPK_SIGNALING_FOR_INTEGRINS	0.37565675	0.75676936	0.79651165	0.7750238	1
REACTOME_TRANSPORT_OF_ORGANIC_ANIONS	-0.29772204	-0.78185374	0.72289157	0.77793396	1
REACTOME_BILE_ACID_AND_BILE_SALT_METABOLISM	-0.2687618	-0.7825828	0.8064516	0.77853775	1
REACTOME_GRB2_SOS_PROVIDES_LINKAGE_TO_MAPK_SIGNALING_FOR_INTERGRINS_	0.36160925	0.7523889	0.81589144	0.77961576	1
REACTOME_INHIBITION_OF_VOLTAGE_GATED_CA2_CHANNELS_VIA_GBETA_GAMMA_SUBUNITS	-0.2326204	-0.77513427	0.7798354	0.78637195	1
KEGG_SULFUR_METABOLISM	-0.29972577	-0.773747	0.7771203	0.78660935	1
REACTOME_RESPIRATORY_ELECTRON_TRANSPORT	0.38199753	0.74598026	0.73293173	0.78716433	1
REACTOME_PI3K_EVENTS_IN_ERBB4_SIGNALING	-0.22847816	-0.76973855	0.75313807	0.79080313	1
REACTOME_DOWNREGULATION_OF_TGF_BETA_RECEPTOR_SIGNALING	0.31826288	0.7421226	0.80430526	0.79112846	1
BIOCARTA_TH1TH2_PATHWAY	-0.2949113	-0.7681406	0.77470356	0.791469	1
REACTOME_SIGNALING_BY_ILS	-0.19059011	-0.7649329	0.8447205	0.79450583	1
REACTOME_CLASS_C_3_METABOTROPIC_GLUTAMATE_PHEROMONE_RECEPTORS	0.29175863	0.73817056	0.7556391	0.7949467	1
REACTOME_PLATELET_AGGREGATION_PLUG_FORMATION	-0.26162496	-0.7593871	0.83157897	0.800886	1
REACTOME_ELEVATION_OF_CYTOSOLIC_CA2_LEVELS	-0.3544029	-0.75591284	0.7804878	0.80405873	1
KEGG_PRIMARY_BILE_ACID_BIOSYNTHESIS	-0.3165939	-0.75140935	0.83953035	0.80869335	1
BIOCARTA_THELPER_PATHWAY	0.30601996	0.7254563	0.74583334	0.8100507	1
REACTOME_OLFACTORY_SIGNALING_PATHWAY	-0.21425043	-0.74834824	0.7560484	0.8111888	1
BIOCARTA_TCYTOTOXIC_PATHWAY	0.30615816	0.72036844	0.75782883	0.81524026	1
REACTOME_SYNTHESIS_OF_PIPS_AT_THE_GOLGI_MEMBRANE	0.25199598	0.7138649	0.80614203	0.8190053	1
REACTOME_SYNTHESIS_OF_BILE_ACIDS_AND_BILE_SALTS	-0.2931573	-0.74045587	0.8596838	0.8191328	1
REACTOME_TRAF6_MEDIATED_NFKB_ACTIVATION	0.2311964	0.71460384	0.8380567	0.8196364	1
BIOCARTA_TCAPOPTOSIS_PATHWAY	-0.29687124	-0.7405348	0.7781753	0.8207294	1
REACTOME_PRE_NOTCH_PROCESSING_IN_GOLGI	0.22692315	0.71479195	0.8145161	0.82092226	1
BIOCARTA_RAC1_PATHWAY	0.23161484	0.70895594	0.88554215	0.82235926	1
REACTOME_GAB1_SIGNALOSOME	0.21771799	0.7097197	0.872093	0.82286125	1
KEGG_PANTOTHENATE_AND_COA_BIOSYNTHESIS	0.26832375	0.7062303	0.85330576	0.82432526	1
REACTOME_IONOTROPIC_ACTIVITY_OF_KAINATE_RECEPTORS	0.25752428	0.7021309	0.82239383	0.8278201	1
REACTOME_ENDOGENOUS_STEROLS	-0.30072412	-0.7317256	0.81	0.8297193	1
REACTOME_TRAFFICKING_AND_PROCESSING_OF_ENDOSOMAL_TLR	-0.34774303	-0.73021114	0.80040735	0.8302787	1
REACTOME_REGULATION_OF_SIGNALING_BY_CBL	-0.23698302	-0.72194636	0.8586066	0.83970916	1
KEGG_CIRCADIAN_RHYTHM_MAMMAL	0.27601057	0.68599886	0.852	0.8455515	1
REACTOME_GAP_JUNCTION_ASSEMBLY	0.3136038	0.6783848	0.8661568	0.85320395	1
KEGG_PENTOSE_AND_GLUCURONATE_INTERCONVERSIONS	-0.3167792	-0.70743823	0.8557114	0.8573822	1
BIOCARTA_GSK3_PATHWAY	-0.28322002	-0.70449555	0.86105263	0.8575655	1
REACTOME_CYTOSOLIC_SULFONATION_OF_SMALL_MOLECULES	-0.25898048	-0.7057498	0.84950495	0.8576835	1
BIOCARTA_CTLA4_PATHWAY	-0.26842123	-0.6991271	0.84412956	0.86251265	1
REACTOME_POTASSIUM_CHANNELS	-0.19617026	-0.68801504	0.80859375	0.86927867	1
REACTOME_VOLTAGE_GATED_POTASSIUM_CHANNELS	-0.23601364	-0.6893674	0.8102467	0.86949503	1
REACTOME_PI3K_EVENTS_IN_ERBB2_SIGNALING	-0.19085392	-0.69216186	0.8830898	0.86954135	1
BIOCARTA_EDG1_PATHWAY	-0.27037528	-0.6894456	0.82377046	0.87118334	1
REACTOME_ACTIVATION_OF_RAC	-0.24807298	-0.6820497	0.8858351	0.8747923	1
REACTOME_DOWNSTREAM_TCR_SIGNALING	-0.20468119	-0.66820776	0.88372093	0.8842638	1
BIOCARTA_SARS_PATHWAY	-0.34275118	-0.6683423	0.9023904	0.88590795	1
REACTOME_ACTIVATED_TAK1_MEDIATES_P38_MAPK_ACTIVATION	-0.20325072	-0.6687463	0.8978389	0.88724005	1
BIOCARTA_PGC1A_PATHWAY	-0.2017122	-0.66977715	0.88631576	0.8878572	1
REACTOME_SYNTHESIS_OF_BILE_ACIDS_AND_BILE_SALTS_VIA_7ALPHA_HYDROXYCHOLESTEROL	-0.27719358	-0.66059786	0.9313725	0.8910375	1
REACTOME_SYNTHESIS_OF_BILE_ACIDS_AND_BILE_SALTS_VIA_24_HYDROXYCHOLESTEROL	-0.30070558	-0.658971	0.8649706	0.89110017	1
KEGG_RIG_I_LIKE_RECEPTOR_SIGNALING_PATHWAY	-0.17333223	-0.63006735	0.92231077	0.9171512	1
BIOCARTA_NO2IL12_PATHWAY	-0.22100604	-0.6316939	0.8888889	0.9174255	1
REACTOME_AMINE_DERIVED_HORMONES	-0.25676903	-0.62633115	0.8977956	0.91902685	1
BIOCARTA_TID_PATHWAY	-0.204066	-0.62367034	0.9230769	0.9197828	1
REACTOME_NA_CL_DEPENDENT_NEUROTRANSMITTER_TRANSPORTERS	-0.22434969	-0.60869616	0.9235537	0.93116546	1
BIOCARTA_RAS_PATHWAY	0.21059136	0.5866004	0.9453125	0.9367253	1
REACTOME_JNK_C_JUN_KINASES_PHOSPHORYLATION_AND_ACTIVATION_MEDIATED_BY_ACTIVATED_HUMAN_TAK1	-0.20597808	-0.59950036	0.9410609	0.9369918	1
BIOCARTA_EIF_PATHWAY	0.29431373	0.5867359	0.89215684	0.93831646	1
BIOCARTA_BARRESTIN_SRC_PATHWAY	-0.21657942	-0.5920568	0.91764706	0.94083065	1
REACTOME_TCA_CYCLE_AND_RESPIRATORY_ELECTRON_TRANSPORT	0.27523196	0.5780485	0.85294116	0.9412209	1
BIOCARTA_BARR_MAPK_PATHWAY	-0.22900233	-0.58534443	0.9192913	0.9442064	1
REACTOME_MYOGENESIS	-0.17407589	-0.5815849	0.97363085	0.94498163	1
REACTOME_RECYCLING_OF_BILE_ACIDS_AND_SALTS	-0.2224827	-0.5698371	0.9317739	0.9511953	1
REACTOME_AMINE_COMPOUND_SLC_TRANSPORTERS	-0.18767688	-0.56184745	0.96516395	0.95428365	1
REACTOME_TERMINATION_OF_O_GLYCAN_BIOSYNTHESIS	-0.23556228	-0.5552398	0.9525617	0.95625734	1
KEGG_GLYCOSPHINGOLIPID_BIOSYNTHESIS_LACTO_AND_NEOLACTO_SERIES	-0.19664133	-0.5514661	0.93737376	0.9567303	1
KEGG_NICOTINATE_AND_NICOTINAMIDE_METABOLISM	-0.22687462	-0.54580885	0.9531568	0.957927	1
BIOCARTA_RNA_PATHWAY	0.19642843	0.52876025	0.97265625	0.96757996	1
REACTOME_DEFENSINS	0.19124676	0.5056717	0.97813123	0.9754721	1
