# Supplementary material for: A Systematic Framework for Drug Repositioning from Integrated Omics and Drug Phenotype Profiles Using Pathway-Drug Network
Source: Biomed Res Int. 2016 Dec 26;2016:7147039. doi: 10.1155/2016/7147039 (PMC5233404; doi:10.1155/2016/7147039)
Supplement: Supplementary file 3 [file 7147039.f3.txt]

# ES : Enrichment Score
# NES : Normalized Enrichment Score
# NOM pvalue : Nominal p-value
# FDR : False Discovery Rate
# FWER : Familywise-error Rate
# For detail explanation of each scores refer to http://software.broadinstitute.org/gsea/doc/GSEAUserGuideFrame.html
NAME	ES	NES	NOM p-val	FDR q-val	FWER p-val
BIOCARTA_GPCR_PATHWAY	-0.57864267	-1.7303036	0.0	0.46196654	0.7020000000000001
BIOCARTA_INSULIN_PATHWAY	-0.63961434	-1.7416512	0.004048583	0.47815794	0.6709999999999999
BIOCARTA_EGF_PATHWAY	-0.61052895	-1.7545633000000003	0.004056795	0.50048935	0.64
BIOCARTA_TPO_PATHWAY	-0.58337736	-1.6937002	0.016064256000000002	0.53554595	0.7879999999999999
BIOCARTA_TCR_PATHWAY	-0.53230834	-1.7023110000000001	0.016359918	0.55405134	0.773
BIOCARTA_IGF1_PATHWAY	-0.6303764000000001	-1.6631967	0.012578616	0.59158266	0.833
BIOCARTA_FCER1_PATHWAY	-0.6098876999999999	-1.7594154	0.001988072	0.59522754	0.63
BIOCARTA_BCR_PATHWAY	-0.56930304	-1.7839256999999997	0.004140787	0.59905934	0.552
REACTOME_ACTIVATION_OF_THE_AP1_FAMILY_OF_TRANSCRIPTION_FACTORS	-0.749218	-1.6525988999999999	0.014141414	0.59994453	0.851
BIOCARTA_PYK2_PATHWAY	-0.4446337	-1.6440861	0.012875536000000002	0.6017118	0.873
KEGG_COLORECTAL_CANCER	-0.45507404	-1.6248622	0.021008403999999998	0.6246921999999999	0.9
BIOCARTA_MET_PATHWAY	-0.51052606	-1.6316493	0.026639344	0.628913	0.8859999999999999
BIOCARTA_PDGF_PATHWAY	-0.5623031999999999	-1.6669018	0.016528925	0.63108957	0.823
BIOCARTA_AGR_PATHWAY	-0.41843796	-1.601942	0.04025424	0.67539907	0.937
REACTOME_NETRIN1_SIGNALING	-0.51313597	-1.6022241000000002	0.015717093	0.7160285	0.937
BIOCARTA_IL2_PATHWAY	-0.6159751	-1.803727	0.004048583	0.7175195	0.501
BIOCARTA_AT1R_PATHWAY	-0.4560107	-1.5829406000000001	0.021367522000000003	0.74770015	0.9570000000000001
BIOCARTA_HER2_PATHWAY	-0.56002414	-1.556594	0.03671706	0.8790251	0.976
BIOCARTA_NGF_PATHWAY	-0.7141566	-1.8384906000000003	0.0	0.9279183000000001	0.39299999999999996
REACTOME_DOUBLE_STRAND_BREAK_REPAIR	-0.12700771	-0.41621113	0.9979879	0.9966252	1.0
BIOCARTA_LYM_PATHWAY	-0.23005822	-0.43366212	0.98221344	0.99681085	1.0
REACTOME_PRESYNAPTIC_NICOTINIC_ACETYLCHOLINE_RECEPTORS	0.16846341	0.42720285	0.992	0.99737513	1.0
REACTOME_ENDOGENOUS_STEROLS	-0.1857199	-0.45561814	0.99013805	0.99754316	1.0
BIOCARTA_TH1TH2_PATHWAY	-0.18396378	-0.4667897	0.98568505	0.99762905	1.0
BIOCARTA_EPHA4_PATHWAY	0.18034098	0.44247288	0.99603176	0.9977771999999999	1.0
KEGG_CELL_ADHESION_MOLECULES_CAMS	-0.13711418	-0.43737432	1.0	0.9981348	1.0
REACTOME_CYTOCHROME_P450_ARRANGED_BY_SUBSTRATE_TYPE	0.19887733	0.56670743	0.99206346	0.9983094000000001	1.0
BIOCARTA_RNA_PATHWAY	-0.19152188	-0.46817586	0.9892472999999999	0.9990976999999999	1.0
KEGG_VIRAL_MYOCARDITIS	0.14514660000000001	0.44551405	0.9960860999999999	0.9993886000000001	1.0
REACTOME_ROLE_OF_DCC_IN_REGULATING_APOPTOSIS	-0.18533614	-0.47603026	0.9980545	0.99939436	1.0
BIOCARTA_NO2IL12_PATHWAY	0.13180073	0.32455552	1.0	0.9997280999999999	1.0
REACTOME_TRANSPORT_OF_INORGANIC_CATIONS_ANIONS_AND_AMINO_ACIDS_OLIGOPEPTIDES	-0.31797495	-1.054749	0.39566928	1.0	1.0
KEGG_THYROID_CANCER	-0.31758454	-1.0495741000000003	0.39024390000000003	1.0	1.0
REACTOME_TOLL_RECEPTOR_CASCADES	-0.28153872	-1.0551465	0.35062242	1.0	1.0
KEGG_PRION_DISEASES	-0.38068593	-1.0566274	0.386	1.0	1.0
REACTOME_SIGNALING_BY_FGFR3_MUTANTS	-0.43661228	-1.051135	0.41769546	1.0	1.0
KEGG_ENDOMETRIAL_CANCER	-0.27472943	-1.0570389999999998	0.3802817	1.0	1.0
REACTOME_SIGNALING_BY_ERBB2	-0.27279523	-1.0506733999999998	0.3486974	1.0	1.0
REACTOME_DOPAMINE_NEUROTRANSMITTER_RELEASE_CYCLE	-0.46508370000000004	-1.049786	0.45783132	1.0	1.0
BIOCARTA_HCMV_PATHWAY	-0.35316643	-1.0791456	0.36252546	1.0	1.0
BIOCARTA_FMLP_PATHWAY	-0.28726426	-1.0490155	0.38379532	1.0	1.0
REACTOME_DEPOSITION_OF_NEW_CENPA_CONTAINING_NUCLEOSOMES_AT_THE_CENTROMERE	-0.35517502	-1.048835	0.40763053	1.0	1.0
REACTOME_KERATAN_SULFATE_BIOSYNTHESIS	-0.37195066	-1.0300158000000001	0.42661450000000006	1.0	1.0
REACTOME_REGULATION_OF_INSULIN_SECRETION	-0.27389458	-1.0301084999999999	0.42284570000000005	1.0	1.0
REACTOME_SIGNALLING_TO_P38_VIA_RIT_AND_RIN	-0.35298458	-1.0313739	0.38912135	1.0	1.0
REACTOME_MEIOTIC_RECOMBINATION	-0.31460065	-1.0340536	0.42690059999999996	1.0	1.0
KEGG_UBIQUITIN_MEDIATED_PROTEOLYSIS	-0.26467854	-1.0354134	0.37574553	1.0	1.0
KEGG_AXON_GUIDANCE	-0.24699970000000002	-1.0378933000000001	0.3707415	1.0	1.0
REACTOME_VEGF_LIGAND_RECEPTOR_INTERACTIONS	-0.4728986	-1.0386405	0.42043220000000003	1.0	1.0
KEGG_NEUROTROPHIN_SIGNALING_PATHWAY	-0.24658320000000003	-1.058424	0.34949496	1.0	1.0
REACTOME_ADENYLATE_CYCLASE_INHIBITORY_PATHWAY	-0.45386073	-1.0401931	0.40824740000000004	1.0	1.0
BIOCARTA_NFAT_PATHWAY	-0.28919283	-1.0436348	0.41894737	1.0	1.0
REACTOME_SHC_MEDIATED_SIGNALLING	-0.3434781	-1.0437014999999998	0.37204299999999996	1.0	1.0
KEGG_REGULATION_OF_AUTOPHAGY	-0.3795967	-1.0438583000000001	0.44924814	1.0	1.0
BIOCARTA_FREE_PATHWAY	-0.3647876	-1.0452336	0.37903225	1.0	1.0
KEGG_GLYCOSYLPHOSPHATIDYLINOSITOL_GPI_ANCHOR_BIOSYNTHESIS	-0.37517434	-1.047131	0.40438247	1.0	1.0
REACTOME_AMINE_COMPOUND_SLC_TRANSPORTERS	-0.45653245	-1.0476568000000002	0.43452382	1.0	1.0
REACTOME_SIGNALING_BY_INSULIN_RECEPTOR	-0.2401085	-1.0486823	0.36157024	1.0	1.0
REACTOME_SPRY_REGULATION_OF_FGF_SIGNALING	-0.38849097	-1.0426655	0.4214876	1.0	1.0
REACTOME_BINDING_AND_ENTRY_OF_HIV_VIRION	-0.6439704	-1.0585622	0.4368932	1.0	1.0
BIOCARTA_TNFR2_PATHWAY	-0.39666540000000006	-1.0651048	0.39834026	1.0	1.0
BIOCARTA_CTLA4_PATHWAY	-0.45063254	-1.0621120000000002	0.43554688	1.0	1.0
REACTOME_OXYGEN_DEPENDENT_PROLINE_HYDROXYLATION_OF_HYPOXIA_INDUCIBLE_FACTOR_ALPHA	-0.37292758	-1.0791396	0.35353535	1.0	1.0
KEGG_APOPTOSIS	-0.26125988	-1.0786343	0.3305785	1.0	1.0
KEGG_DORSO_VENTRAL_AXIS_FORMATION	-0.33258206	-1.0778290000000001	0.35051546	1.0	1.0
KEGG_FC_EPSILON_RI_SIGNALING_PATHWAY	-0.27470657	-1.0769066	0.35341364	1.0	1.0
REACTOME_PI3K_EVENTS_IN_ERBB2_SIGNALING	-0.36353886	-1.0764971	0.33861387	1.0	1.0
KEGG_GRAFT_VERSUS_HOST_DISEASE	-0.4528133	-1.0761577	0.39105058	1.0	1.0
REACTOME_SIGNALING_BY_ERBB4	-0.29731208	-1.075465	0.30470347	1.0	1.0
REACTOME_PRE_NOTCH_TRANSCRIPTION_AND_TRANSLATION	-0.34265396	-1.070643	0.35151514	1.0	1.0
REACTOME_PRE_NOTCH_EXPRESSION_AND_PROCESSING	-0.3002562	-1.0696106	0.35596707	1.0	1.0
BIOCARTA_CDK5_PATHWAY	-0.43411005	-1.0679978	0.364	1.0	1.0
REACTOME_DOWNSTREAM_TCR_SIGNALING	-0.40456602	-1.0805668	0.36023623	1.0	1.0
REACTOME_KERATAN_SULFATE_DEGRADATION	-0.54629123	-1.0819366000000001	0.40944883	1.0	1.0
KEGG_PATHWAYS_IN_CANCER	-0.245905	-1.0846006000000001	0.28451884	1.0	1.0
BIOCARTA_SKP2E2F_PATHWAY	-0.37838304	-1.0860168	0.32443532	1.0	1.0
REACTOME_BETA_DEFENSINS	-0.60632527	-1.0878739	0.37325349999999996	1.0	1.0
KEGG_PANCREATIC_CANCER	-0.24748962	-1.0889381	0.33056134	1.0	1.0
BIOCARTA_MAL_PATHWAY	-0.36740246	-1.0901638	0.3075314	1.0	1.0
REACTOME_IL_6_SIGNALING	-0.48194784	-1.0904201	0.35600000000000004	1.0	1.0
REACTOME_ASSOCIATION_OF_TRIC_CCT_WITH_TARGET_PROTEINS_DURING_BIOSYNTHESIS	-0.38814965	-1.0904737	0.37944663	1.0	1.0
BIOCARTA_GSK3_PATHWAY	-0.37836490000000006	-1.09426	0.29126215	1.0	1.0
REACTOME_CIRCADIAN_CLOCK	-0.3132983	-1.0970801000000001	0.32921812	1.0	1.0
REACTOME_AMINE_LIGAND_BINDING_RECEPTORS	-0.42035756	-1.0973408000000002	0.40674603	1.0	1.0
REACTOME_MEIOSIS	-0.2693461	-1.0290195	0.41649899999999995	1.0	1.0
REACTOME_CHONDROITIN_SULFATE_BIOSYNTHESIS	-0.43101369999999994	-1.0665133999999998	0.38369780000000003	1.0	1.0
REACTOME_SMAD2_SMAD3_SMAD4_HETEROTRIMER_REGULATES_TRANSCRIPTION	-0.3933596	-1.0802403999999999	0.35365853	1.0	1.0
REACTOME_SYNTHESIS_OF_VERY_LONG_CHAIN_FATTY_ACYL_COAS	-0.5113635	-1.0644076	0.38367346	1.0	1.0
REACTOME_LYSOSOME_VESICLE_BIOGENESIS	-0.33420905	-1.0630852	0.37743190000000004	1.0	1.0
BIOCARTA_CELLCYCLE_PATHWAY	-0.35513338	-1.0617988999999999	0.38617885	1.0	1.0
BIOCARTA_PTC1_PATHWAY	-0.4494661	-1.0259091	0.46843177	1.0	1.0
REACTOME_DSCAM_INTERACTIONS	-0.32241595	-0.9954021000000001	0.45219123	1.0	1.0
REACTOME_ETHANOL_OXIDATION	-0.5654800999999999	-1.0239307	0.47920793	1.0	1.0
KEGG_CHRONIC_MYELOID_LEUKEMIA	-0.23774618	-0.9624309000000001	0.48804780000000003	1.0	1.0
BIOCARTA_NKCELLS_PATHWAY	-0.31359899999999996	-0.9622959000000001	0.4826175999999999	1.0	1.0
REACTOME_NOD1_2_SIGNALING_PATHWAY	-0.29158434	-0.9603031999999999	0.4969325	1.0	1.0
REACTOME_NRAGE_SIGNALS_DEATH_THROUGH_JNK	-0.24065039	-0.9593510000000001	0.53169733	1.0	1.0
REACTOME_ANDROGEN_BIOSYNTHESIS	-0.44671825	-0.95643526	0.55278313	1.0	1.0
KEGG_DRUG_METABOLISM_CYTOCHROME_P450	-0.34915840000000004	-0.9561028	0.5191571	1.0	1.0
REACTOME_NEF_MEDIATED_DOWNREGULATION_OF_MHC_CLASS_I_COMPLEX_CELL_SURFACE_EXPRESSION	-0.33426258	-0.95450026	0.52996254	1.0	1.0
KEGG_CHEMOKINE_SIGNALING_PATHWAY	-0.26655429999999997	-0.95319057	0.52642274	1.0	1.0
BIOCARTA_TNFR1_PATHWAY	-0.277329	-0.95302176	0.52409637	1.0	1.0
REACTOME_GPVI_MEDIATED_ACTIVATION_CASCADE	-0.31674240000000004	-0.95289874	0.5138889	1.0	1.0
REACTOME_AMINO_ACID_TRANSPORT_ACROSS_THE_PLASMA_MEMBRANE	-0.32212555	-0.95162463	0.55	1.0	1.0
REACTOME_GRB2_SOS_PROVIDES_LINKAGE_TO_MAPK_SIGNALING_FOR_INTERGRINS_	-0.34222373	-0.9514347	0.527668	1.0	1.0
BIOCARTA_GH_PATHWAY	-0.26534283	-0.9493718000000001	0.5081300999999999	1.0	1.0
REACTOME_CYCLIN_E_ASSOCIATED_EVENTS_DURING_G1_S_TRANSITION_	-0.29970095	-0.9482179000000001	0.5099602	1.0	1.0
BIOCARTA_RACCYCD_PATHWAY	-0.31525502	-0.94745326	0.51244813	1.0	1.0
BIOCARTA_WNT_PATHWAY	-0.32907322	-0.94572693	0.525	1.0	1.0
BIOCARTA_RAC1_PATHWAY	-0.28604603	-0.9456445	0.5303326999999999	1.0	1.0
REACTOME_PKA_MEDIATED_PHOSPHORYLATION_OF_CREB	-0.372014	-0.94359577	0.5424063	1.0	1.0
BIOCARTA_MAPK_PATHWAY	-0.24991999999999998	-0.94313395	0.53677934	1.0	1.0
REACTOME_P2Y_RECEPTORS	-0.50598705	-0.9417615	0.61782175	1.0	1.0
BIOCARTA_AKAP13_PATHWAY	-0.36098543	-0.9394021	0.5601659999999999	1.0	1.0
REACTOME_MEIOTIC_SYNAPSIS	-0.26960993	-0.9385264999999999	0.534	1.0	1.0
BIOCARTA_NDKDYNAMIN_PATHWAY	-0.37082282	-0.9359531999999999	0.54016066	1.0	1.0
REACTOME_XENOBIOTICS	-0.42784247	-0.9348904	0.5838264	1.0	1.0
KEGG_PROSTATE_CANCER	-0.23782477	-0.9343966	0.5555555999999999	1.0	1.0
KEGG_NOD_LIKE_RECEPTOR_SIGNALING_PATHWAY	-0.32383484	-0.9320915000000001	0.550813	1.0	1.0
BIOCARTA_BAD_PATHWAY	-0.2992223	-0.93136007	0.5430862	1.0	1.0
BIOCARTA_GABA_PATHWAY	-0.42228994	-0.963931	0.5410156	1.0	1.0
REACTOME_PI3K_EVENTS_IN_ERBB4_SIGNALING	-0.3725945	-1.0250092	0.43232325	1.0	1.0
KEGG_REGULATION_OF_ACTIN_CYTOSKELETON	-0.22282743	-0.9677620000000001	0.46385542	1.0	1.0
BIOCARTA_RAB_PATHWAY	-0.40200349999999996	-0.978241	0.47257385	1.0	1.0
BIOCARTA_STRESS_PATHWAY	-0.3223302	-1.0234202	0.38177875	1.0	1.0
BIOCARTA_ERYTH_PATHWAY	-0.41856363	-1.0203685	0.46893787	1.0	1.0
REACTOME_INWARDLY_RECTIFYING_K_CHANNELS	-0.3524894	-1.019287	0.42800790000000005	1.0	1.0
REACTOME_CYCLIN_A_B1_ASSOCIATED_EVENTS_DURING_G2_M_TRANSITION	-0.43008277	-1.0146055	0.46625766	1.0	1.0
REACTOME_CLASS_C_3_METABOTROPIC_GLUTAMATE_PHEROMONE_RECEPTORS	-0.41194359999999997	-1.0142392	0.46804512	1.0	1.0
REACTOME_SLC_MEDIATED_TRANSMEMBRANE_TRANSPORT	-0.26754808	-1.0126894	0.45490983	1.0	1.0
BIOCARTA_NOS1_PATHWAY	-0.34676746	-1.0122551	0.48207173	1.0	1.0
REACTOME_KERATAN_SULFATE_KERATIN_METABOLISM	-0.343932	-1.0101758	0.46796116	1.0	1.0
REACTOME_NUCLEOTIDE_LIKE_PURINERGIC_RECEPTORS	-0.50161344	-1.0059884	0.49304175	1.0	1.0
KEGG_PROTEIN_EXPORT	-0.39467916	-1.0048139	0.44752476	1.0	1.0
REACTOME_ADHERENS_JUNCTIONS_INTERACTIONS	-0.31924167	-1.0045855	0.45799999999999996	1.0	1.0
REACTOME_EGFR_DOWNREGULATION	-0.35506129999999997	-0.99848664	0.45992365	1.0	1.0
BIOCARTA_IL17_PATHWAY	-0.5461389	-1.0986646	0.3992095	1.0	1.0
BIOCARTA_SPPA_PATHWAY	-0.3168709	-0.9945132999999999	0.45436105	1.0	1.0
REACTOME_GABA_RECEPTOR_ACTIVATION	-0.34594938	-0.9942795	0.48674244	1.0	1.0
REACTOME_SIGNALING_BY_NOTCH	-0.2593219	-0.99310035	0.47244096	1.0	1.0
REACTOME_DEFENSINS	-0.43801084	-0.9930719000000001	0.45799999999999996	1.0	1.0
KEGG_AMYOTROPHIC_LATERAL_SCLEROSIS_ALS	-0.25902367	-0.99226964	0.46726862	1.0	1.0
REACTOME_MYOGENESIS	-0.27336305	-0.9920484	0.46376812	1.0	1.0
REACTOME_PROSTANOID_LIGAND_RECEPTORS	-0.49135506	-0.98945636	0.5142276	1.0	1.0
BIOCARTA_CFTR_PATHWAY	-0.40211296	-0.98677653	0.47082496	1.0	1.0
REACTOME_FATTY_ACYL_COA_BIOSYNTHESIS	-0.42177529999999996	-0.98675746	0.46028513	1.0	1.0
REACTOME_ACETYLCHOLINE_NEUROTRANSMITTER_RELEASE_CYCLE	-0.38655900000000004	-0.9855509	0.50292397	1.0	1.0
KEGG_RETINOL_METABOLISM	-0.37865072	-0.98429275	0.48368523	1.0	1.0
REACTOME_GASTRIN_CREB_SIGNALLING_PATHWAY_VIA_PKC_AND_MAPK	-0.24632995	-0.9831904	0.49801588	1.0	1.0
KEGG_JAK_STAT_SIGNALING_PATHWAY	-0.24848059	-0.9828322	0.47983869999999995	1.0	1.0
REACTOME_REGULATION_OF_AMPK_ACTIVITY_VIA_LKB1	-0.34649435	-0.98257196	0.47524753	1.0	1.0
BIOCARTA_EDG1_PATHWAY	-0.29806033	-0.97414094	0.5041840999999999	1.0	1.0
BIOCARTA_PLCE_PATHWAY	-0.44287598	-1.0997772	0.37701613	1.0	1.0
REACTOME_CS_DS_DEGRADATION	-0.49467567	-1.1223865	0.3468208	1.0	1.0
REACTOME_CREB_PHOSPHORYLATION_THROUGH_THE_ACTIVATION_OF_CAMKII	-0.4095526	-1.1023188	0.36811024	1.0	1.0
REACTOME_PYRUVATE_METABOLISM	-0.5275651	-1.2826434	0.16326529999999997	1.0	1.0
REACTOME_REGULATION_OF_PYRUVATE_DEHYDROGENASE_PDH_COMPLEX	-0.5969544	-1.2814885	0.18518518	1.0	1.0
REACTOME_TRANSCRIPTIONAL_ACTIVITY_OF_SMAD2_SMAD3_SMAD4_HETEROTRIMER	-0.418713	-1.2808676	0.18108653	1.0	1.0
BIOCARTA_BCELLSURVIVAL_PATHWAY	-0.47914895	-1.2796298000000002	0.17330678	1.0	1.0
KEGG_MELANOMA	-0.3518068	-1.2766243999999998	0.1493776	1.0	1.0
REACTOME_ARMS_MEDIATED_ACTIVATION	-0.43214154	-1.2755428999999998	0.14545454	1.0	1.0
REACTOME_FGFR1_LIGAND_BINDING_AND_ACTIVATION	-0.48299634	-1.2730948	0.21414141	1.0	1.0
REACTOME_IL_2_SIGNALING	-0.32346678	-1.2710633	0.12955466	1.0	1.0
REACTOME_PROLONGED_ERK_ACTIVATION_EVENTS	-0.40284505	-1.2687051999999999	0.13265306	1.0	1.0
REACTOME_TRIF_MEDIATED_TLR3_SIGNALING	-0.33031097	-1.268429	0.12889813	1.0	1.0
REACTOME_ROLE_OF_SECOND_MESSENGERS_IN_NETRIN1_SIGNALING	-0.50718266	-1.263067	0.22350675	1.0	1.0
REACTOME_ACTIVATED_TLR4_SIGNALLING	-0.34758317	-1.2628051000000002	0.13207547	1.0	1.0
REACTOME_IL_RECEPTOR_SHC_SIGNALING	-0.3530169	-1.2623739	0.13173653	1.0	1.0
BIOCARTA_CTCF_PATHWAY	-0.44772929999999994	-1.2587148000000001	0.2192623	1.0	1.0
REACTOME_SOS_MEDIATED_SIGNALLING	-0.45736012	-1.2563326000000001	0.19742489	1.0	1.0
REACTOME_IL_3_5_AND_GM_CSF_SIGNALING	-0.34529486	-1.2538828000000002	0.14583333	1.0	1.0
BIOCARTA_STEM_PATHWAY	-0.4990732	-1.252363	0.2296748	1.0	1.0
BIOCARTA_TOLL_PATHWAY	-0.41926157	-1.250173	0.17786561	1.0	1.0
BIOCARTA_GCR_PATHWAY	-0.45355412	-1.2493377	0.20449898	1.0	1.0
KEGG_ADHERENS_JUNCTION	-0.29180172	-1.2460006000000001	0.16205534	1.0	1.0
REACTOME_SHC1_EVENTS_IN_EGFR_SIGNALING	-0.4352653	-1.2432530000000002	0.15789473	1.0	1.0
REACTOME_SIGNALING_BY_CONSTITUTIVELY_ACTIVE_EGFR	-0.41441613	-1.2396738999999999	0.17029703	1.0	1.0
REACTOME_GENERIC_TRANSCRIPTION_PATHWAY	-0.30159393	-1.2396313	0.14876033	1.0	1.0
REACTOME_NOREPINEPHRINE_NEUROTRANSMITTER_RELEASE_CYCLE	-0.5422577	-1.2369912	0.20600000000000002	1.0	1.0
REACTOME_FGFR2C_LIGAND_BINDING_AND_ACTIVATION	-0.488781	-1.2351166999999998	0.24590164	1.0	1.0
BIOCARTA_CYTOKINE_PATHWAY	-0.49274236	-1.2345092	0.27920792	1.0	1.0
REACTOME_RAP1_SIGNALLING	-0.45990820000000004	-1.2315943	0.19222903	1.0	1.0
BIOCARTA_LEPTIN_PATHWAY	-0.5540014	-1.2849905000000001	0.21289062	1.0	1.0
REACTOME_SIGNALING_BY_ACTIVATED_POINT_MUTANTS_OF_FGFR1	-0.49342963	-1.2298741000000002	0.24949698	1.0	1.0
REACTOME_SIGNAL_ATTENUATION	-0.43632418	-1.2855979	0.19427402	1.0	1.0
BIOCARTA_CD40_PATHWAY	-0.48163953	-1.2895769	0.1936842	1.0	1.0
BIOCARTA_NTHI_PATHWAY	-0.46980006	-1.373364	0.14078675	1.0	1.0
REACTOME_DEADENYLATION_OF_MRNA	-0.48867646	-1.3730829	0.18235295	1.0	1.0
REACTOME_INCRETIN_SYNTHESIS_SECRETION_AND_INACTIVATION	-0.5786641	-1.3689593	0.102	1.0	1.0
BIOCARTA_KERATINOCYTE_PATHWAY	-0.4450937	-1.3659778	0.0882353	1.0	1.0
REACTOME_G1_PHASE	-0.40829012	-1.3631098	0.12175649	1.0	1.0
BIOCARTA_CARDIACEGF_PATHWAY	-0.6579802	-1.3570825	0.138	1.0	1.0
REACTOME_NEPHRIN_INTERACTIONS	-0.48890185	-1.349907	0.1390593	1.0	1.0
REACTOME_DOWNREGULATION_OF_ERBB2_ERBB3_SIGNALING	-0.4600617	-1.3437204	0.08219178	1.0	1.0
REACTOME_SYNTHESIS_SECRETION_AND_INACTIVATION_OF_GIP	-0.62304294	-1.3355974	0.12720157	1.0	1.0
KEGG_ERBB_SIGNALING_PATHWAY	-0.35291827	-1.3332601999999998	0.080912866	1.0	1.0
KEGG_WNT_SIGNALING_PATHWAY	-0.33585545	-1.3307277	0.06779661	1.0	1.0
BIOCARTA_CCR5_PATHWAY	-0.6696229	-1.3301180000000001	0.1783567	1.0	1.0
BIOCARTA_IL2RB_PATHWAY	-0.39286020000000005	-1.3276801999999999	0.116935484	1.0	1.0
REACTOME_GLUTAMATE_NEUROTRANSMITTER_RELEASE_CYCLE	-0.47868900000000003	-1.32454	0.13752456	1.0	1.0
REACTOME_NUCLEAR_RECEPTOR_TRANSCRIPTION_PATHWAY	-0.41220814	-1.3238398999999998	0.122621566	1.0	1.0
REACTOME_SHC1_EVENTS_IN_ERBB4_SIGNALING	-0.54952556	-1.3224926000000001	0.11715481400000001	1.0	1.0
REACTOME_APOPTOTIC_CLEAVAGE_OF_CELL_ADHESION_PROTEINS	-0.61231	-1.318645	0.18687873	1.0	1.0
BIOCARTA_HIF_PATHWAY	-0.5172395000000001	-1.309006	0.16666667	1.0	1.0
REACTOME_NFKB_AND_MAP_KINASES_ACTIVATION_MEDIATED_BY_TLR4_SIGNALING_REPERTOIRE	-0.35619012	-1.3066554	0.11561866	1.0	1.0
BIOCARTA_D4GDI_PATHWAY	-0.5140432	-1.3030217	0.14760914	1.0	1.0
REACTOME_SIGNALING_BY_ILS	-0.35556224	-1.3007128000000001	0.15904573	1.0	1.0
KEGG_TGF_BETA_SIGNALING_PATHWAY	-0.36848190000000003	-1.3005526	0.14495799	1.0	1.0
BIOCARTA_ALK_PATHWAY	-0.36964923	-1.299934	0.12978724	1.0	1.0
REACTOME_SYNTHESIS_OF_GLYCOSYLPHOSPHATIDYLINOSITOL_GPI	-0.50557905	-1.294149	0.16346154	1.0	1.0
BIOCARTA_P27_PATHWAY	-0.46555302	-1.2935667	0.16698657	1.0	1.0
REACTOME_SIGNALING_BY_FGFR_MUTANTS	-0.35626942	-1.2915118	0.12266112	1.0	1.0
KEGG_RENAL_CELL_CARCINOMA	-0.32174757	-1.2898505	0.14989734	1.0	1.0
REACTOME_SIGNALING_BY_NODAL	-0.40435758	-1.2864947	0.14257029	1.0	1.0
REACTOME_BMAL1_CLOCK_NPAS2_ACTIVATES_CIRCADIAN_EXPRESSION	-0.35588083	-1.1009265	0.35845214	1.0	1.0
REACTOME_REGULATION_OF_KIT_SIGNALING	-0.4404719	-1.2261641	0.24266145	1.0	1.0
BIOCARTA_ATM_PATHWAY	-0.4093483	-1.221971	0.21052632	1.0	1.0
REACTOME_TRANSPORT_OF_VITAMINS_NUCLEOSIDES_AND_RELATED_MOLECULES	-0.37448066	-1.1448548	0.24740125	1.0	1.0
REACTOME_G_ALPHA1213_SIGNALLING_EVENTS	-0.27093354	-1.1421536	0.24896266	1.0	1.0
REACTOME_NEUROTRANSMITTER_RELEASE_CYCLE	-0.41706714	-1.1409782	0.32874015	1.0	1.0
KEGG_EPITHELIAL_CELL_SIGNALING_IN_HELICOBACTER_PYLORI_INFECTION	-0.30487359999999997	-1.1393583999999999	0.27402863	1.0	1.0
REACTOME_FRS2_MEDIATED_CASCADE	-0.33905393	-1.1389347	0.27991885	1.0	1.0
REACTOME_NUCLEAR_SIGNALING_BY_ERBB4	-0.38276154	-1.1376365	0.27672955	1.0	1.0
KEGG_VASOPRESSIN_REGULATED_WATER_REABSORPTION	-0.30959309999999995	-1.1364112	0.3146718	1.0	1.0
REACTOME_NA_CL_DEPENDENT_NEUROTRANSMITTER_TRANSPORTERS	-0.5049702	-1.1361098	0.3553398	1.0	1.0
REACTOME_RECYCLING_OF_BILE_ACIDS_AND_SALTS	-0.44081825	-1.1340033999999999	0.27991885	1.0	1.0
REACTOME_FGFR4_LIGAND_BINDING_AND_ACTIVATION	-0.45422587	-1.1318408000000002	0.31041667	1.0	1.0
BIOCARTA_BARR_MAPK_PATHWAY	-0.36507794	-1.1283537000000001	0.30223125	1.0	1.0
KEGG_PROXIMAL_TUBULE_BICARBONATE_RECLAMATION	-0.38331807	-1.126601	0.27165353	1.0	1.0
REACTOME_PRE_NOTCH_PROCESSING_IN_GOLGI	-0.37208316	-1.1258575000000002	0.30321285	1.0	1.0
REACTOME_REGULATION_OF_SIGNALING_BY_CBL	-0.39671287	-1.1225268	0.3205645	1.0	1.0
REACTOME_P130CAS_LINKAGE_TO_MAPK_SIGNALING_FOR_INTEGRINS	-0.3577875	-0.9310728000000001	0.5617284	1.0	1.0
BIOCARTA_PARKIN_PATHWAY	-0.461244	-1.1198558	0.31578946	1.0	1.0
BIOCARTA_CERAMIDE_PATHWAY	-0.34255078	-1.1179725	0.30927834	1.0	1.0
KEGG_NITROGEN_METABOLISM	-0.44044027	-1.1177773000000002	0.32093933	1.0	1.0
REACTOME_SIGNALING_BY_RHO_GTPASES	-0.2620522	-1.1127646	0.25510204	1.0	1.0
BIOCARTA_CHREBP2_PATHWAY	-0.33217078	-1.1119691	0.33663365	1.0	1.0
REACTOME_INSULIN_RECEPTOR_SIGNALLING_CASCADE	-0.26035097	-1.1115391000000001	0.2526096	1.0	1.0
REACTOME_INHIBITION_OF_VOLTAGE_GATED_CA2_CHANNELS_VIA_GBETA_GAMMA_SUBUNITS	-0.39877367	-1.1099441	0.33333334	1.0	1.0
BIOCARTA_GATA3_PATHWAY	-0.41326899999999994	-1.1094540000000002	0.33136094	1.0	1.0
KEGG_MAPK_SIGNALING_PATHWAY	-0.25369169999999996	-1.1091151000000001	0.27551020000000004	1.0	1.0
REACTOME_RAF_MAP_KINASE_CASCADE	-0.41501963	-1.1055177	0.31055900000000003	1.0	1.0
REACTOME_SIGNALLING_TO_ERKS	-0.28210762	-1.1045466999999998	0.29094827	1.0	1.0
REACTOME_FGFR_LIGAND_BINDING_AND_ACTIVATION	-0.39311	-1.1026595	0.33950618	1.0	1.0
REACTOME_TRANSPORT_OF_ORGANIC_ANIONS	-0.51670855	-1.147558	0.32786885	1.0	1.0
KEGG_T_CELL_RECEPTOR_SIGNALING_PATHWAY	-0.32482034	-1.222423	0.19587629	1.0	1.0
BIOCARTA_CCR3_PATHWAY	-0.32096627	-1.1488192	0.28	1.0	1.0
REACTOME_TRANS_GOLGI_NETWORK_VESICLE_BUDDING	-0.33352777	-1.1549530000000001	0.2868687	1.0	1.0
REACTOME_REGULATION_OF_RHEB_GTPASE_ACTIVITY_BY_AMPK	-0.46959728	-1.2203834999999998	0.26171875	1.0	1.0
BIOCARTA_INFLAM_PATHWAY	-0.45182556	-1.219241	0.27845529999999996	1.0	1.0
KEGG_ALDOSTERONE_REGULATED_SODIUM_REABSORPTION	-0.37539598	-1.2164187	0.19206679999999998	1.0	1.0
REACTOME_NEGATIVE_REGULATION_OF_FGFR_SIGNALING	-0.35970435	-1.2157633999999997	0.18346775	1.0	1.0
REACTOME_IRAK1_RECRUITS_IKK_COMPLEX	-0.5691621	-1.2142481999999999	0.27066115	1.0	1.0
BIOCARTA_PAR1_PATHWAY	-0.33761436	-1.2135379	0.22672065	1.0	1.0
KEGG_CIRCADIAN_RHYTHM_MAMMAL	-0.5286651	-1.2087444999999999	0.29387754	1.0	1.0
BIOCARTA_PPARA_PATHWAY	-0.38076603	-1.2065614	0.22427984	1.0	1.0
REACTOME_GLUCURONIDATION	-0.696483	-1.1995083999999998	0.25	1.0	1.0
REACTOME_SHC_RELATED_EVENTS	-0.37148783	-1.1964391	0.20124482	1.0	1.0
KEGG_BASAL_TRANSCRIPTION_FACTORS	-0.31870508	-1.1935409	0.2109375	1.0	1.0
KEGG_PENTOSE_AND_GLUCURONATE_INTERCONVERSIONS	-0.54149985	-1.1890792	0.25585938	1.0	1.0
REACTOME_METABOLISM_OF_POLYAMINES	-0.5171137	-1.1874126	0.29098362	1.0	1.0
BIOCARTA_ASBCELL_PATHWAY	-0.54379797	-1.1847531999999998	0.3156863	1.0	1.0
REACTOME_GOLGI_ASSOCIATED_VESICLE_BIOGENESIS	-0.36807525	-1.1826317	0.26938775	1.0	1.0
REACTOME_ACTIVATION_OF_RAC	-0.42845052	-1.1818585	0.27125505	1.0	1.0
REACTOME_SHC_MEDIATED_CASCADE	-0.39770237	-1.1774768999999998	0.24845996	1.0	1.0
KEGG_VEGF_SIGNALING_PATHWAY	-0.29513973	-1.1763061000000001	0.22845691	1.0	1.0
REACTOME_SIGNALING_BY_FGFR1_MUTANTS	-0.3348163	-1.1749655	0.2768595	1.0	1.0
KEGG_TOLL_LIKE_RECEPTOR_SIGNALING_PATHWAY	-0.34288737	-1.1724876	0.22222222	1.0	1.0
KEGG_NON_SMALL_CELL_LUNG_CANCER	-0.27161008	-1.1670171999999999	0.20618556	1.0	1.0
REACTOME_PLATELET_AGGREGATION_PLUG_FORMATION	-0.33799008	-1.1644205	0.22896282	1.0	1.0
KEGG_LEISHMANIA_INFECTION	-0.40255183	-1.1601555000000001	0.29841897	1.0	1.0
REACTOME_SIGNALING_BY_HIPPO	-0.4809785	-1.159059	0.34927234	1.0	1.0
REACTOME_GABA_B_RECEPTOR_ACTIVATION	-0.3916353	-1.158125	0.25595239999999997	1.0	1.0
REACTOME_GABA_SYNTHESIS_RELEASE_REUPTAKE_AND_DEGRADATION	-0.46457879999999996	-1.157242	0.29841897	1.0	1.0
KEGG_ASCORBATE_AND_ALDARATE_METABOLISM	-0.5768276	-1.1566353	0.30120483	1.0	1.0
BIOCARTA_VIP_PATHWAY	-0.44320613	-1.1516201000000001	0.30927834	1.0	1.0
REACTOME_G_ALPHA_S_SIGNALLING_EVENTS	-0.25345778	-0.92972404	0.54274356	1.0	1.0
KEGG_CYSTEINE_AND_METHIONINE_METABOLISM	-0.3188795	-0.9269594000000001	0.5555555999999999	1.0	1.0
KEGG_MELANOGENESIS	-0.26773718	-0.9277304	0.6	1.0	1.0
REACTOME_ION_CHANNEL_TRANSPORT	-0.24079412	-0.7166895000000001	0.82912624	1.0	1.0
REACTOME_TRAF6_MEDIATED_NFKB_ACTIVATION	-0.22724639	-0.7164578	0.8684211	1.0	1.0
REACTOME_REGULATION_OF_THE_FANCONI_ANEMIA_PATHWAY	-0.31643355	-0.71405494	0.8059999999999999	1.0	1.0
REACTOME_REGULATION_OF_GLUCOKINASE_BY_GLUCOKINASE_REGULATORY_PROTEIN	-0.22724313	-0.71332496	0.7751004	1.0	1.0
KEGG_SYSTEMIC_LUPUS_ERYTHEMATOSUS	-0.21965429	-0.71313936	0.8463035	1.0	1.0
BIOCARTA_AGPCR_PATHWAY	-0.26764134	-0.7094751	0.80287474	1.0	1.0
REACTOME_ACTIVATION_OF_BH3_ONLY_PROTEINS	-0.26885614	-0.7091331999999999	0.84631145	1.0	1.0
REACTOME_CYTOKINE_SIGNALING_IN_IMMUNE_SYSTEM	-0.17986466	-0.70685524	0.9006211	1.0	1.0
REACTOME_DOWNSTREAM_SIGNALING_EVENTS_OF_B_CELL_RECEPTOR_BCR	-0.21403992	-0.7066024999999999	0.85132384	1.0	1.0
REACTOME_REGULATION_OF_INSULIN_SECRETION_BY_GLUCAGON_LIKE_PEPTIDE1	-0.21943615	-0.70400655	0.904	1.0	1.0
KEGG_GLYCOSPHINGOLIPID_BIOSYNTHESIS_GANGLIO_SERIES	-0.28275138	-0.7029167	0.84294236	1.0	1.0
KEGG_NEUROACTIVE_LIGAND_RECEPTOR_INTERACTION	-0.20616548	-0.7009092	0.76937985	1.0	1.0
KEGG_CYTOSOLIC_DNA_SENSING_PATHWAY	-0.22305606	-0.70079356	0.9466403	1.0	1.0
REACTOME_S_PHASE	-0.20798968	-0.7000366	0.8370221	1.0	1.0
REACTOME_E2F_ENABLED_INHIBITION_OF_PRE_REPLICATION_COMPLEX_FORMATION	-0.34615546	-0.7176178000000001	0.789899	1.0	1.0
REACTOME_CLASS_B_2_SECRETIN_FAMILY_RECEPTORS	-0.18906368	-0.69991386	0.9287169	1.0	1.0
KEGG_DRUG_METABOLISM_OTHER_ENZYMES	-0.23667562	-0.6992331999999999	0.9564394	1.0	1.0
KEGG_STEROID_HORMONE_BIOSYNTHESIS	-0.26865008	-0.6982268	0.8684211	1.0	1.0
BIOCARTA_ARF_PATHWAY	-0.25992894	-0.6968880999999999	0.7922912	1.0	1.0
KEGG_TYPE_II_DIABETES_MELLITUS	-0.18023634	-0.6921373000000001	0.90781564	1.0	1.0
REACTOME_MRNA_DECAY_BY_5_TO_3_EXORIBONUCLEASE	-0.25857863	-0.6915932	0.85404336	1.0	1.0
KEGG_ALLOGRAFT_REJECTION	-0.28504765	-0.6901984	0.77335984	1.0	1.0
KEGG_HEMATOPOIETIC_CELL_LINEAGE	-0.21588072	-0.68795896	0.8695652	1.0	1.0
BIOCARTA_CSK_PATHWAY	-0.25594068	-0.68794876	0.8241107	1.0	1.0
REACTOME_PLC_BETA_MEDIATED_EVENTS	-0.19855706	-0.6878769	0.92110455	1.0	1.0
REACTOME_IONOTROPIC_ACTIVITY_OF_KAINATE_RECEPTORS	-0.2785048	-0.68461436	0.86015326	1.0	1.0
REACTOME_AMINE_DERIVED_HORMONES	-0.31904516	-0.68370974	0.88142294	1.0	1.0
REACTOME_CD28_DEPENDENT_VAV1_PATHWAY	-0.2665364	-0.6822055	0.8	1.0	1.0
REACTOME_INSULIN_SYNTHESIS_AND_PROCESSING	-0.21719551	-0.68114233	0.91729325	1.0	1.0
BIOCARTA_VDR_PATHWAY	-0.23980376	-0.67970514	0.8648648999999999	1.0	1.0
REACTOME_PLATELET_HOMEOSTASIS	-0.17838117	-0.699883	0.9297913000000001	1.0	1.0
BIOCARTA_RB_PATHWAY	-0.24353127	-0.67959946	0.82194614	1.0	1.0
REACTOME_SIGNALING_BY_NOTCH1	-0.20681794	-0.7194596	0.93957114	1.0	1.0
REACTOME_TAK1_ACTIVATES_NFKB_BY_PHOSPHORYLATION_AND_ACTIVATION_OF_IKKS_COMPLEX	-0.22133937	-0.7222729	0.82377046	1.0	1.0
REACTOME_PHASE1_FUNCTIONALIZATION_OF_COMPOUNDS	-0.28029662	-0.76035786	0.82834333	1.0	1.0
REACTOME_CHROMOSOME_MAINTENANCE	-0.19849311	-0.7601306	0.7810651	1.0	1.0
REACTOME_SIGNALING_BY_WNT	-0.26095419999999997	-0.7599193000000001	0.7227925999999999	1.0	1.0
BIOCARTA_ERK_PATHWAY	-0.21992685	-0.75863487	0.846	1.0	1.0
KEGG_GLYCOSPHINGOLIPID_BIOSYNTHESIS_LACTO_AND_NEOLACTO_SERIES	-0.2434337	-0.75788736	0.7134503000000001	1.0	1.0
BIOCARTA_LAIR_PATHWAY	-0.3613317	-0.75628954	0.76180696	1.0	1.0
BIOCARTA_CK1_PATHWAY	-0.27159247	-0.75566417	0.75	1.0	1.0
REACTOME_APOPTOTIC_CLEAVAGE_OF_CELLULAR_PROTEINS	-0.24555	-0.7550064999999999	0.89668614	1.0	1.0
REACTOME_FACILITATIVE_NA_INDEPENDENT_GLUCOSE_TRANSPORTERS	-0.29439598	-0.7541411	0.81873727	1.0	1.0
KEGG_SMALL_CELL_LUNG_CANCER	-0.21192665	-0.7530663000000001	0.80864197	1.0	1.0
KEGG_ADIPOCYTOKINE_SIGNALING_PATHWAY	-0.2124544	-0.7530505	0.85626286	1.0	1.0
BIOCARTA_IL12_PATHWAY	-0.30739775	-0.75297195	0.75102884	1.0	1.0
REACTOME_SIGNALING_BY_THE_B_CELL_RECEPTOR_BCR	-0.20133631	-0.74886894	0.8595040999999999	1.0	1.0
REACTOME_TRANSPORT_OF_RIBONUCLEOPROTEINS_INTO_THE_HOST_NUCLEUS	-0.25072774	-0.7479534000000001	0.71057886	1.0	1.0
REACTOME_ACTIVATION_OF_CHAPERONE_GENES_BY_ATF6_ALPHA	-0.32340506	-0.7196638000000001	0.836	1.0	1.0
KEGG_TYPE_I_DIABETES_MELLITUS	-0.28830793	-0.7479180999999999	0.72244096	1.0	1.0
REACTOME_CELL_CELL_COMMUNICATION	-0.19877842	-0.7461859000000001	0.8559838	1.0	1.0
BIOCARTA_TFF_PATHWAY	-0.23977171	-0.7455955	0.8235294	1.0	1.0
REACTOME_BIOLOGICAL_OXIDATIONS	-0.22926956	-0.74267215	0.93116635	1.0	1.0
KEGG_DILATED_CARDIOMYOPATHY	-0.18132320000000002	-0.7426126999999999	0.8722555000000001	1.0	1.0
REACTOME_FACTORS_INVOLVED_IN_MEGAKARYOCYTE_DEVELOPMENT_AND_PLATELET_PRODUCTION	-0.18850150000000002	-0.742323	0.90138066	1.0	1.0
REACTOME_NEP_NS2_INTERACTS_WITH_THE_CELLULAR_EXPORT_MACHINERY	-0.26349664	-0.7409256999999999	0.7211155	1.0	1.0
REACTOME_TRYPTOPHAN_CATABOLISM	-0.33306956	-0.73924005	0.79337233	1.0	1.0
BIOCARTA_ACE2_PATHWAY	-0.33530205	-0.73901016	0.77	1.0	1.0
REACTOME_NUCLEOTIDE_BINDING_DOMAIN_LEUCINE_RICH_REPEAT_CONTAINING_RECEPTOR_NLR_SIGNALING_PATHWAYS	-0.19566841	-0.7347395999999999	0.8145161	1.0	1.0
BIOCARTA_PS1_PATHWAY	-0.23745258	-0.7325223000000001	0.8181818000000001	1.0	1.0
REACTOME_EICOSANOID_LIGAND_BINDING_RECEPTORS	-0.30107340000000005	-0.73129696	0.7625	1.0	1.0
REACTOME_RECEPTOR_LIGAND_BINDING_INITIATES_THE_SECOND_PROTEOLYTIC_CLEAVAGE_OF_NOTCH_RECEPTOR	-0.24845171	-0.7293586	0.8169557	1.0	1.0
REACTOME_ACTIVATION_OF_GENES_BY_ATF4	-0.29230464	-0.7274258000000001	0.88554215	1.0	1.0
REACTOME_PHOSPHOLIPASE_C_MEDIATED_CASCADE	-0.20449567	-0.7243094	0.9010309000000001	1.0	1.0
KEGG_METABOLISM_OF_XENOBIOTICS_BY_CYTOCHROME_P450	-0.2802495	-0.7467498	0.88718927	1.0	1.0
REACTOME_CLASS_I_MHC_MEDIATED_ANTIGEN_PROCESSING_PRESENTATION	-0.21031414	-0.7630241	0.81836736	1.0	1.0
REACTOME_INSULIN_RECEPTOR_RECYCLING	-0.23766647	-0.67729884	0.9046728999999999	1.0	1.0
REACTOME_CYTOSOLIC_TRNA_AMINOACYLATION	-0.23799947	-0.6759708000000001	0.7955911999999999	1.0	1.0
REACTOME_PLATELET_ADHESION_TO_EXPOSED_COLLAGEN	-0.27618337	-0.57295	0.92261904	1.0	1.0
REACTOME_PLATELET_CALCIUM_HOMEOSTASIS	-0.21049243	-0.56703913	0.9245283000000001	1.0	1.0
KEGG_BUTANOATE_METABOLISM	-0.18537311	-0.56339484	0.9525691999999999	1.0	1.0
REACTOME_TCA_CYCLE_AND_RESPIRATORY_ELECTRON_TRANSPORT	-0.20129499	-0.56131995	0.9346154000000001	1.0	1.0
REACTOME_BILE_SALT_AND_ORGANIC_ANION_SLC_TRANSPORTERS	-0.28365409999999996	-0.5599128999999999	0.9455645	1.0	1.0
REACTOME_SEMA4D_INDUCED_CELL_MIGRATION_AND_GROWTH_CONE_COLLAPSE	-0.21748504	-0.55704886	0.924	1.0	1.0
BIOCARTA_EIF_PATHWAY	-0.22527958	-0.55259556	0.9263804	1.0	1.0
BIOCARTA_ATRBRCA_PATHWAY	-0.17844157	-0.5503273	0.95210725	1.0	1.0
BIOCARTA_GRANULOCYTES_PATHWAY	-0.23738018	-0.5502614	0.937751	1.0	1.0
BIOCARTA_SET_PATHWAY	-0.2212478	-0.54826254	0.95610684	1.0	1.0
KEGG_PHENYLALANINE_METABOLISM	-0.20600085	-0.54806775	0.98155737	1.0	1.0
REACTOME_SEMA4D_IN_SEMAPHORIN_SIGNALING	-0.2050225	-0.5475871999999999	0.9489796	1.0	1.0
REACTOME_PHOSPHORYLATION_OF_CD3_AND_TCR_ZETA_CHAINS	-0.30309188	-0.53892136	0.9179999999999999	1.0	1.0
KEGG_HISTIDINE_METABOLISM	-0.17002906	-0.5386725	0.98985803	1.0	1.0
REACTOME_PEPTIDE_HORMONE_BIOSYNTHESIS	-0.2352752	-0.57865995	0.9469548000000001	1.0	1.0
REACTOME_STEROID_HORMONES	-0.1914346	-0.5380776999999999	0.9576108	1.0	1.0
REACTOME_TRANSLOCATION_OF_ZAP_70_TO_IMMUNOLOGICAL_SYNAPSE	-0.29437926	-0.53193545	0.94188374	1.0	1.0
REACTOME_METABOLISM_OF_STEROID_HORMONES_AND_VITAMINS_A_AND_D	-0.17770486	-0.52952737	0.9574468	1.0	1.0
REACTOME_G2_M_DNA_DAMAGE_CHECKPOINT	-0.25046635	-0.5261756999999999	0.9403292	1.0	1.0
KEGG_MATURITY_ONSET_DIABETES_OF_THE_YOUNG	-0.16811594	-0.52606577	0.93822396	1.0	1.0
BIOCARTA_EXTRINSIC_PATHWAY	-0.21993841	-0.52483106	0.9759519	1.0	1.0
REACTOME_DIGESTION_OF_DIETARY_CARBOHYDRATE	-0.33771890000000004	-0.52223253	0.96428573	1.0	1.0
KEGG_LINOLEIC_ACID_METABOLISM	-0.19319579999999997	-0.5198972	0.96332043	1.0	1.0
REACTOME_CLEAVAGE_OF_GROWING_TRANSCRIPT_IN_THE_TERMINATION_REGION_	-0.15419638	-0.51726377	0.9294355	1.0	1.0
REACTOME_P75NTR_RECRUITS_SIGNALLING_COMPLEXES	-0.19942079999999998	-0.5127932	0.9672447	1.0	1.0
REACTOME_ACETYLCHOLINE_BINDING_AND_DOWNSTREAM_EVENTS	-0.1991696	-0.5065761	0.94921875	1.0	1.0
KEGG_TASTE_TRANSDUCTION	-0.1743245	-0.5022763	0.9511719000000001	1.0	1.0
REACTOME_P75NTR_SIGNALS_VIA_NFKB	-0.19945289	-0.48467228	0.9541985000000001	1.0	1.0
BIOCARTA_TCRA_PATHWAY	-0.26310559999999994	-0.48312375	0.9520000000000001	1.0	1.0
REACTOME_SYNTHESIS_OF_PIPS_AT_THE_LATE_ENDOSOME_MEMBRANE	-0.21406102	-0.4795917	0.9610655999999999	1.0	1.0
BIOCARTA_NEUROTRANSMITTERS_PATHWAY	-0.26350757	-0.53606725	0.96484375	1.0	1.0
REACTOME_CA_DEPENDENT_EVENTS	-0.21114324	-0.67642474	0.93227094	1.0	1.0
REACTOME_REGULATION_OF_APOPTOSIS	-0.19661036	-0.58027077	0.94057375	1.0	1.0
REACTOME_EFFECTS_OF_PIP2_HYDROLYSIS	-0.17688598	-0.5838486999999999	0.97244096	1.0	1.0
KEGG_CELL_CYCLE	-0.19185978	-0.6755954000000001	0.8926315999999999	1.0	1.0
REACTOME_APOPTOTIC_EXECUTION_PHASE	-0.20134036	-0.66525584	0.9644969999999999	1.0	1.0
KEGG_AUTOIMMUNE_THYROID_DISEASE	-0.26023942	-0.6645565999999999	0.8185484000000001	1.0	1.0
REACTOME_HORMONE_LIGAND_BINDING_RECEPTORS	-0.30590647	-0.6643171999999999	0.83458644	1.0	1.0
REACTOME_KINESINS	-0.28197318	-0.6609524	0.8614458	1.0	1.0
REACTOME_JNK_C_JUN_KINASES_PHOSPHORYLATION_AND_ACTIVATION_MEDIATED_BY_ACTIVATED_HUMAN_TAK1	-0.197737	-0.66039187	0.93333334	1.0	1.0
REACTOME_ACTIVATION_OF_CHAPERONES_BY_ATF6_ALPHA	-0.26849562	-0.65263975	0.91	1.0	1.0
BIOCARTA_PROTEASOME_PATHWAY	-0.28338438	-0.651984	0.8247011999999999	1.0	1.0
REACTOME_FORMATION_OF_FIBRIN_CLOT_CLOTTING_CASCADE	-0.22957379	-0.6519505999999999	0.9247525	1.0	1.0
REACTOME_ANTIGEN_ACTIVATES_B_CELL_RECEPTOR_LEADING_TO_GENERATION_OF_SECOND_MESSENGERS	-0.20856941	-0.64974385	0.87903225	1.0	1.0
BIOCARTA_RHO_PATHWAY	-0.21517470000000002	-0.6495399000000001	0.9159999999999999	1.0	1.0
BIOCARTA_CBL_PATHWAY	-0.24884266	-0.64908487	0.90335304	1.0	1.0
REACTOME_REGULATION_OF_INSULIN_SECRETION_BY_ACETYLCHOLINE	-0.25538948	-0.64872277	0.9345238000000001	1.0	1.0
REACTOME_G1_S_TRANSITION	-0.20077185	-0.644568	0.88295686	1.0	1.0
REACTOME_SYNTHESIS_OF_PIPS_AT_THE_EARLY_ENDOSOME_MEMBRANE	-0.27334836	-0.5825030999999999	0.9198396999999999	1.0	1.0
REACTOME_CDT1_ASSOCIATION_WITH_THE_CDC6_ORC_ORIGIN_COMPLEX	-0.22657546	-0.64328915	0.8562753000000001	1.0	1.0
REACTOME_TRANSPORT_OF_MATURE_MRNA_DERIVED_FROM_AN_INTRONLESS_TRANSCRIPT	-0.21588583	-0.6362264	0.8214286	1.0	1.0
REACTOME_AUTODEGRADATION_OF_CDH1_BY_CDH1_APC_C	-0.22032781	-0.6302812	0.9079999999999999	1.0	1.0
REACTOME_NEURONAL_SYSTEM	-0.15590656	-0.62511647	0.95525295	1.0	1.0
REACTOME_P53_DEPENDENT_G1_DNA_DAMAGE_RESPONSE	-0.20572601	-0.6188598000000001	0.9166667	1.0	1.0
REACTOME_TRANSPORT_OF_MATURE_TRANSCRIPT_TO_CYTOPLASM	-0.19361943	-0.61678416	0.80237156	1.0	1.0
REACTOME_GLUCOSE_TRANSPORT	-0.16793793	-0.61601025	0.9101796	1.0	1.0
BIOCARTA_IL7_PATHWAY	-0.22963668	-0.6082685999999999	0.8984064	1.0	1.0
REACTOME_PI_METABOLISM	-0.1638355	-0.60537547	0.9506173000000001	1.0	1.0
REACTOME_TCR_SIGNALING	-0.19925252	-0.60499346	0.93436295	1.0	1.0
REACTOME_REGULATION_OF_ORNITHINE_DECARBOXYLASE_ODC	-0.22693379	-0.5974013000000001	0.9100205	1.0	1.0
BIOCARTA_BLYMPHOCYTE_PATHWAY	-0.29753125	-0.59248024	0.8801572	1.0	1.0
REACTOME_APOPTOSIS_INDUCED_DNA_FRAGMENTATION	-0.23147477	-0.5891834	0.91715974	1.0	1.0
KEGG_INTESTINAL_IMMUNE_NETWORK_FOR_IGA_PRODUCTION	-0.24874854	-0.5845647	0.9116466000000001	1.0	1.0
REACTOME_INTERACTIONS_OF_VPR_WITH_HOST_CELLULAR_PROTEINS	-0.19187088	-0.58387786	0.9554655999999999	1.0	1.0
KEGG_GLYCOLYSIS_GLUCONEOGENESIS	-0.16702598	-0.63815105	0.9847328000000002	1.0	1.0
REACTOME_INHIBITION_OF_REPLICATION_INITIATION_OF_DAMAGED_DNA_BY_RB1_E2F1	-0.28550097	-0.7642803000000001	0.7788845	1.0	1.0
KEGG_PHOSPHATIDYLINOSITOL_SIGNALING_SYSTEM	-0.19247071	-0.76710266	0.8767966999999999	1.0	1.0
BIOCARTA_VEGF_PATHWAY	-0.21640074	-0.76812124	0.82738096	1.0	1.0
KEGG_ASTHMA	-0.41534909999999997	-0.88427824	0.6040404	1.0	1.0
KEGG_ARGININE_AND_PROLINE_METABOLISM	-0.26895916	-0.883733	0.6531008	1.0	1.0
BIOCARTA_CREB_PATHWAY	-0.24640737	-0.8834190000000001	0.63083166	1.0	1.0
REACTOME_SYNTHESIS_OF_PIPS_AT_THE_PLASMA_MEMBRANE	-0.26692846	-0.8832844999999999	0.6292585	1.0	1.0
REACTOME_SIGNALING_BY_FGFR	-0.21558861	-0.8803023000000001	0.7247899	1.0	1.0
BIOCARTA_HDAC_PATHWAY	-0.26954168	-0.878611	0.65088755	1.0	1.0
BIOCARTA_VITCB_PATHWAY	-0.40920156	-0.87858844	0.6314741	1.0	1.0
REACTOME_ADENYLATE_CYCLASE_ACTIVATING_PATHWAY	-0.43655708	-0.8780904	0.6321138000000001	1.0	1.0
BIOCARTA_FAS_PATHWAY	-0.26062918	-0.8758872999999999	0.6023166	1.0	1.0
KEGG_ALANINE_ASPARTATE_AND_GLUTAMATE_METABOLISM	-0.31043687	-0.87523806	0.6466019000000001	1.0	1.0
KEGG_PRIMARY_BILE_ACID_BIOSYNTHESIS	-0.34818208	-0.8749021	0.65995973	1.0	1.0
REACTOME_REGULATION_OF_HYPOXIA_INDUCIBLE_FACTOR_HIF_BY_OXYGEN	-0.2541575	-0.8730525	0.6198347	1.0	1.0
KEGG_LONG_TERM_POTENTIATION	-0.24070740000000002	-0.87168205	0.68190855	1.0	1.0
KEGG_MISMATCH_REPAIR	-0.30050707	-0.87141603	0.60546875	1.0	1.0
REACTOME_CHONDROITIN_SULFATE_DERMATAN_SULFATE_METABOLISM	-0.29782706	-0.88499653	0.6389451999999999	1.0	1.0
REACTOME_ENERGY_DEPENDENT_REGULATION_OF_MTOR_BY_LKB1_AMPK	-0.2789798	-0.8712228000000001	0.5838264	1.0	1.0
REACTOME_MRNA_3_END_PROCESSING	-0.27557597	-0.8699846	0.5826772	1.0	1.0
KEGG_OOCYTE_MEIOSIS	-0.24210586	-0.86930543	0.65531063	1.0	1.0
REACTOME_SIGNALING_BY_TGF_BETA_RECEPTOR_COMPLEX	-0.24976076	-0.8679849000000001	0.61178863	1.0	1.0
REACTOME_PI3K_CASCADE	-0.201177	-0.8674023999999999	0.719917	1.0	1.0
REACTOME_INHIBITION_OF_INSULIN_SECRETION_BY_ADRENALINE_NORADRENALINE	-0.28319088	-0.8672196	0.65192306	1.0	1.0
REACTOME_CDC6_ASSOCIATION_WITH_THE_ORC_ORIGIN_COMPLEX	-0.36049634	-0.8665048000000001	0.6302521	1.0	1.0
REACTOME_REGULATION_OF_GENE_EXPRESSION_IN_BETA_CELLS	-0.2560527	-0.86421055	0.6442308000000001	1.0	1.0
REACTOME_SPHINGOLIPID_DE_NOVO_BIOSYNTHESIS	-0.31874728	-0.86272657	0.642562	1.0	1.0
REACTOME_RIP_MEDIATED_NFKB_ACTIVATION_VIA_DAI	-0.30604646	-0.8619336	0.6419491999999999	1.0	1.0
REACTOME_ERK_MAPK_TARGETS	-0.27309245	-0.8618696	0.65833336	1.0	1.0
REACTOME_PYRUVATE_METABOLISM_AND_CITRIC_ACID_TCA_CYCLE	-0.3015348	-0.8618338	0.65208745	1.0	1.0
BIOCARTA_CALCINEURIN_PATHWAY	-0.2961989	-0.8615671999999999	0.63265306	1.0	1.0
REACTOME_DARPP_32_EVENTS	-0.29566997	-0.8604414	0.63672656	1.0	1.0
BIOCARTA_TCAPOPTOSIS_PATHWAY	-0.43957394	-0.8568555	0.6472945999999999	1.0	1.0
REACTOME_REGULATION_OF_WATER_BALANCE_BY_RENAL_AQUAPORINS	-0.24899709	-0.8706866	0.672	1.0	1.0
REACTOME_OLFACTORY_SIGNALING_PATHWAY	-0.33773315	-0.8546205	0.6213018	1.0	1.0
KEGG_HYPERTROPHIC_CARDIOMYOPATHY_HCM	-0.21805567	-0.8856004999999999	0.6450939	1.0	1.0
REACTOME_NITRIC_OXIDE_STIMULATES_GUANYLATE_CYCLASE	-0.34643558	-0.88630795	0.5963489000000001	1.0	1.0
KEGG_B_CELL_RECEPTOR_SIGNALING_PATHWAY	-0.3857908	-1.3738945	0.09836066	1.0	1.0
KEGG_STARCH_AND_SUCROSE_METABOLISM	-0.33536392	-0.9249644	0.5782178000000001	1.0	1.0
REACTOME_ADVANCED_GLYCOSYLATION_ENDPRODUCT_RECEPTOR_SIGNALING	-0.32301047	-0.91977596	0.54244304	1.0	1.0
BIOCARTA_ECM_PATHWAY	-0.3229532	-0.9193353999999999	0.5641026	1.0	1.0
BIOCARTA_MYOSIN_PATHWAY	-0.24034318	-0.9185088	0.58433735	1.0	1.0
REACTOME_REVERSIBLE_HYDRATION_OF_CARBON_DIOXIDE	-0.43862492	-0.9182002	0.5890411	1.0	1.0
BIOCARTA_PGC1A_PATHWAY	-0.31898287	-0.9174610999999999	0.5862069000000001	1.0	1.0
REACTOME_CTNNB1_PHOSPHORYLATION_CASCADE	-0.3360754	-0.91663545	0.5373737	1.0	1.0
REACTOME_SIGNALING_BY_GPCR	-0.24138653	-0.91618145	0.5882353	1.0	1.0
REACTOME_G_ALPHA_Q_SIGNALLING_EVENTS	-0.23653422	-0.913603	0.5810276999999999	1.0	1.0
REACTOME_CELL_CELL_JUNCTION_ORGANIZATION	-0.25202912	-0.91176194	0.625	1.0	1.0
KEGG_PROGESTERONE_MEDIATED_OOCYTE_MATURATION	-0.23918124	-0.9072428	0.59732825	1.0	1.0
REACTOME_GPCR_DOWNSTREAM_SIGNALING	-0.25026536	-0.9054374	0.5839844	1.0	1.0
REACTOME_TRANSPORT_OF_GLUCOSE_AND_OTHER_SUGARS_BILE_SALTS_AND_ORGANIC_ACIDS_METAL_IONS_AND_AMINE_COMPOUNDS	-0.29206318	-0.904264	0.57539684	1.0	1.0
REACTOME_SIGNALING_BY_FGFR_IN_DISEASE	-0.21065588	-0.88572115	0.70292884	1.0	1.0
REACTOME_SIGNALING_BY_EGFR_IN_CANCER	-0.22980234	-0.90358967	0.67460316	1.0	1.0
BIOCARTA_IL10_PATHWAY	-0.3418353	-0.9022599	0.63727456	1.0	1.0
REACTOME_PACKAGING_OF_TELOMERE_ENDS	-0.31347072	-0.9018943000000001	0.5700196999999999	1.0	1.0
REACTOME_GABA_A_RECEPTOR_ACTIVATION	-0.44805598	-0.90014577	0.6319846	1.0	1.0
REACTOME_GAP_JUNCTION_ASSEMBLY	-0.32513484	-0.8999693999999999	0.5782881	1.0	1.0
REACTOME_HIGHLY_CALCIUM_PERMEABLE_POSTSYNAPTIC_NICOTINIC_ACETYLCHOLINE_RECEPTORS	-0.41107684	-0.8980054	0.6225295999999999	1.0	1.0
REACTOME_REGULATION_OF_BETA_CELL_DEVELOPMENT	-0.24685198	-0.8970007999999999	0.5944881999999999	1.0	1.0
REACTOME_ANTIGEN_PROCESSING_UBIQUITINATION_PROTEASOME_DEGRADATION	-0.2566344	-0.8966895	0.58178055	1.0	1.0
REACTOME_CIRCADIAN_REPRESSION_OF_EXPRESSION_BY_REV_ERBA	-0.310611	-0.8966695	0.60818714	1.0	1.0
REACTOME_DESTABILIZATION_OF_MRNA_BY_TRISTETRAPROLIN_TTP	-0.34565854	-0.8962549000000001	0.5967741999999999	1.0	1.0
KEGG_OLFACTORY_TRANSDUCTION	-0.31131533	-0.8944978000000001	0.578	1.0	1.0
REACTOME_ASSOCIATION_OF_LICENSING_FACTORS_WITH_THE_PRE_REPLICATIVE_COMPLEX	-0.3465565	-0.89277965	0.5610765999999999	1.0	1.0
REACTOME_G_ALPHA_I_SIGNALLING_EVENTS	-0.28099886	-0.8924846	0.6056338000000001	1.0	1.0
BIOCARTA_TOB1_PATHWAY	-0.32626164	-0.8903606	0.6402439	1.0	1.0
REACTOME_SEROTONIN_RECEPTORS	-0.38746053	-0.88924396	0.6117646999999999	1.0	1.0
REACTOME_RNA_POL_I_PROMOTER_OPENING	-0.3042977	-0.9035866	0.5796813	1.0	1.0
REACTOME_NEGATIVE_REGULATORS_OF_RIG_I_MDA5_SIGNALING	-0.2810023	-0.8538386999999998	0.6919918	1.0	1.0
BIOCARTA_ARAP_PATHWAY	-0.30183497	-0.8509014000000001	0.6754564000000001	1.0	1.0
BIOCARTA_AKT_PATHWAY	-0.3038822	-0.8437428	0.6583851	1.0	1.0
REACTOME_SCFSKP2_MEDIATED_DEGRADATION_OF_P27_P21	-0.26185778	-0.8067845	0.67583495	1.0	1.0
KEGG_INOSITOL_PHOSPHATE_METABOLISM	-0.22537431	-0.80565214	0.82590234	1.0	1.0
REACTOME_GPCR_LIGAND_BINDING	-0.23687655	-0.80409557	0.7348178000000001	1.0	1.0
KEGG_GNRH_SIGNALING_PATHWAY	-0.19128881	-0.8002832	0.85940593	1.0	1.0
REACTOME_CGMP_EFFECTS	-0.32429233	-0.7957936999999999	0.6799205	1.0	1.0
REACTOME_YAP1_AND_WWTR1_TAZ_STIMULATED_GENE_EXPRESSION	-0.26276320000000003	-0.79523903	0.7352342	1.0	1.0
REACTOME_GLYCOSAMINOGLYCAN_METABOLISM	-0.21588163	-0.79476255	0.86336637	1.0	1.0
REACTOME_INTEGRIN_ALPHAIIB_BETA3_SIGNALING	-0.24658673	-0.794592	0.7845850000000001	1.0	1.0
REACTOME_GLYCOPROTEIN_HORMONES	-0.3451261	-0.7944656	0.72265625	1.0	1.0
KEGG_FATTY_ACID_METABOLISM	-0.23407733	-0.79389226	0.8310413000000001	1.0	1.0
REACTOME_COMMON_PATHWAY	-0.31395096	-0.790615	0.7253385	1.0	1.0
REACTOME_PROCESSING_OF_INTRONLESS_PRE_MRNAS	-0.3045857	-0.7886121	0.6566265	1.0	1.0
REACTOME_AMINO_ACID_AND_OLIGOPEPTIDE_SLC_TRANSPORTERS	-0.25569594	-0.7881564999999999	0.7405941	1.0	1.0
REACTOME_LIGAND_GATED_ION_CHANNEL_TRANSPORT	-0.36051285	-0.7865492	0.72762644	1.0	1.0
KEGG_ACUTE_MYELOID_LEUKEMIA	-0.23923352	-0.8084528	0.7822581000000001	1.0	1.0
REACTOME_ACTIVATION_OF_NMDA_RECEPTOR_UPON_GLUTAMATE_BINDING_AND_POSTSYNAPTIC_EVENTS	-0.23888706	-0.7825674	0.79843444	1.0	1.0
REACTOME_AQUAPORIN_MEDIATED_TRANSPORT	-0.22472622	-0.7801077	0.84282905	1.0	1.0
BIOCARTA_CARM1_PATHWAY	-0.30746496	-0.78006244	0.7245763000000001	1.0	1.0
REACTOME_TIGHT_JUNCTION_INTERACTIONS	-0.2788443	-0.77801144	0.80981594	1.0	1.0
BIOCARTA_MONOCYTE_PATHWAY	-0.37241799999999997	-0.7777592	0.71709234	1.0	1.0
BIOCARTA_EGFR_SMRTE_PATHWAY	-0.3341208	-0.7776061	0.771134	1.0	1.0
BIOCARTA_INTEGRIN_PATHWAY	-0.2528569	-0.7761391	0.75555557	1.0	1.0
BIOCARTA_RAS_PATHWAY	-0.263208	-0.77574277	0.7746479000000001	1.0	1.0
BIOCARTA_IGF1R_PATHWAY	-0.268243	-0.77486265	0.7672065	1.0	1.0
BIOCARTA_SHH_PATHWAY	-0.23919047	-0.77480716	0.7429719	1.0	1.0
KEGG_VASCULAR_SMOOTH_MUSCLE_CONTRACTION	-0.19685283	-0.7741623000000001	0.8755101999999999	1.0	1.0
KEGG_CYTOKINE_CYTOKINE_RECEPTOR_INTERACTION	-0.23590398	-0.77360773	0.7621053000000001	1.0	1.0
REACTOME_NEUROTRANSMITTER_RECEPTOR_BINDING_AND_DOWNSTREAM_TRANSMISSION_IN_THE_POSTSYNAPTIC_CELL	-0.20216487	-0.77348393	0.81070745	1.0	1.0
KEGG_TYROSINE_METABOLISM	-0.24034007	-0.76953304	0.8625497999999999	1.0	1.0
REACTOME_HEMOSTASIS	-0.17785965	-0.76862705	0.92727274	1.0	1.0
REACTOME_PEPTIDE_LIGAND_BINDING_RECEPTORS	-0.25718820000000003	-0.78148204	0.7782258000000001	1.0	1.0
KEGG_PROPANOATE_METABOLISM	-0.28639865	-0.8110892	0.68623483	1.0	1.0
KEGG_GLIOMA	-0.22237591	-0.81394714	0.7654584	1.0	1.0
REACTOME_G_ALPHA_Z_SIGNALLING_EVENTS	-0.23540439	-0.81486	0.8119002	1.0	1.0
REACTOME_CHEMOKINE_RECEPTORS_BIND_CHEMOKINES	-0.36951464	-0.84305304	0.65873015	1.0	1.0
REACTOME_A_TETRASACCHARIDE_LINKER_SEQUENCE_IS_REQUIRED_FOR_GAG_SYNTHESIS	-0.34643567	-0.8424316999999999	0.7009901	1.0	1.0
REACTOME_CELL_SURFACE_INTERACTIONS_AT_THE_VASCULAR_WALL	-0.25319836	-0.8414273000000001	0.66340506	1.0	1.0
BIOCARTA_G1_PATHWAY	-0.24037313	-0.84124637	0.6666667	1.0	1.0
KEGG_ENDOCYTOSIS	-0.20156069	-0.83996326	0.81362724	1.0	1.0
BIOCARTA_CDC42RAC_PATHWAY	-0.3403276	-0.83981466	0.6125	1.0	1.0
REACTOME_CLASS_A1_RHODOPSIN_LIKE_RECEPTORS	-0.26489654	-0.8396629999999999	0.67193675	1.0	1.0
REACTOME_POST_TRANSLATIONAL_MODIFICATION_SYNTHESIS_OF_GPI_ANCHORED_PROTEINS	-0.30914718	-0.8367833	0.68307084	1.0	1.0
REACTOME_CELL_DEATH_SIGNALLING_VIA_NRAGE_NRIF_AND_NADE	-0.18975823	-0.83549374	0.75247526	1.0	1.0
KEGG_LONG_TERM_DEPRESSION	-0.21829677	-0.8353189	0.7368420999999999	1.0	1.0
REACTOME_RAS_ACTIVATION_UOPN_CA2_INFUX_THROUGH_NMDA_RECEPTOR	-0.29378074	-0.83519375	0.66340506	1.0	1.0
REACTOME_TRANSMISSION_ACROSS_CHEMICAL_SYNAPSES	-0.21552110000000002	-0.83382744	0.6923077	1.0	1.0
REACTOME_SIGNALING_BY_FGFR1_FUSION_MUTANTS	-0.26966614	-0.83316267	0.6492248	1.0	1.0
KEGG_CALCIUM_SIGNALING_PATHWAY	-0.2041039	-0.8320029	0.70756644	1.0	1.0
REACTOME_PROLACTIN_RECEPTOR_SIGNALING	-0.26842245	-0.83131856	0.718	1.0	1.0
REACTOME_ACTIVATION_OF_NF_KAPPAB_IN_B_CELLS	-0.26789159999999995	-0.83122635	0.6421471	1.0	1.0
REACTOME_PERK_REGULATED_GENE_EXPRESSION	-0.32417673	-0.8307200000000001	0.70445347	1.0	1.0
REACTOME_CD28_CO_STIMULATION	-0.24214629999999998	-0.81528026	0.72839504	1.0	1.0
REACTOME_CTLA4_INHIBITORY_SIGNALING	-0.27472726	-0.8195306999999998	0.70485437	1.0	1.0
KEGG_ARRHYTHMOGENIC_RIGHT_VENTRICULAR_CARDIOMYOPATHY_ARVC	-0.19775823	-0.81978446	0.77045906	1.0	1.0
REACTOME_BILE_ACID_AND_BILE_SALT_METABOLISM	-0.28178033	-0.8221171	0.7995951	1.0	1.0
KEGG_GAP_JUNCTION	-0.22674670000000002	-0.8232088	0.75578946	1.0	1.0
REACTOME_RNA_POL_I_TRANSCRIPTION	-0.23556189	-0.8243254000000001	0.6736641	1.0	1.0
REACTOME_INTEGRATION_OF_ENERGY_METABOLISM	-0.22523925	-0.9288139000000001	0.6114398	1.0	1.0
REACTOME_NUCLEAR_EVENTS_KINASE_AND_TRANSCRIPTION_FACTOR_ACTIVATION	-0.25338697	-0.82620287	0.7010309	1.0	1.0
KEGG_FC_GAMMA_R_MEDIATED_PHAGOCYTOSIS	-0.22277948	-0.8277329999999999	0.728	1.0	1.0
KEGG_P53_SIGNALING_PATHWAY	-0.26319757	-0.82880485	0.7163560999999999	1.0	1.0
BIOCARTA_NO1_PATHWAY	-0.26258376	-0.8289761	0.7064579000000001	1.0	1.0
REACTOME_NOTCH1_INTRACELLULAR_DOMAIN_REGULATES_TRANSCRIPTION	-0.25827449999999996	-0.8301138000000001	0.7575149999999999	1.0	1.0
REACTOME_PASSIVE_TRANSPORT_BY_AQUAPORINS	-0.3827865	-0.83030975	0.66603416	1.0	1.0
REACTOME_TRANSMEMBRANE_TRANSPORT_OF_SMALL_MOLECULES	-0.20434836	-0.83032215	0.8074656	1.0	1.0
BIOCARTA_PTEN_PATHWAY	-0.26739487	-0.82686275	0.68190855	1.0	1.0
BIOCARTA_ETS_PATHWAY	-0.58947766	-1.3775518999999998	0.10208333	1.0	1.0
BIOCARTA_CACAM_PATHWAY	0.6200963	1.6810964	0.02016129	1.0	0.816
REACTOME_DCC_MEDIATED_ATTRACTIVE_SIGNALING	-0.5546125	-1.389742	0.11445783	1.0	1.0
REACTOME_GLOBAL_GENOMIC_NER_GG_NER	0.37352875	1.0269314	0.45360824	1.0	1.0
REACTOME_METABOLISM_OF_LIPIDS_AND_LIPOPROTEINS	0.22954305	1.0240098	0.38722554	1.0	1.0
KEGG_ONE_CARBON_POOL_BY_FOLATE	0.36579987	1.0234543	0.4271255	1.0	1.0
KEGG_RENIN_ANGIOTENSIN_SYSTEM	0.41215497	1.0226523	0.39591837	1.0	1.0
REACTOME_INTERFERON_SIGNALING	0.2845227	1.0223708	0.39043826	1.0	1.0
REACTOME_INTEGRATION_OF_PROVIRUS	0.46757309999999996	1.0200930000000001	0.48178136	1.0	1.0
REACTOME_GAMMA_CARBOXYLATION_TRANSPORT_AND_AMINO_TERMINAL_CLEAVAGE_OF_PROTEINS	0.39341435	1.0191753000000001	0.4428858	1.0	1.0
REACTOME_FORMATION_OF_ATP_BY_CHEMIOSMOTIC_COUPLING	0.48562878	1.0186572	0.48380566	1.0	1.0
REACTOME_RNA_POL_III_CHAIN_ELONGATION	0.38834336	1.0183716999999999	0.45691383	1.0	1.0
REACTOME_SIGNALING_BY_PDGF	0.29447729999999994	1.01481	0.43614929999999996	1.0	1.0
BIOCARTA_G2_PATHWAY	0.32648563	1.0128179	0.44444445	1.0	1.0
REACTOME_G0_AND_EARLY_G1	0.33844674	1.0102711	0.43664718	1.0	1.0
REACTOME_G_BETA_GAMMA_SIGNALLING_THROUGH_PLC_BETA	0.35565737	1.0091861	0.43789473	1.0	1.0
REACTOME_DOWNREGULATION_OF_TGF_BETA_RECEPTOR_SIGNALING	0.3407706	1.027893	0.41010100000000005	1.0	1.0
BIOCARTA_PML_PATHWAY	0.34961477	1.0084004	0.44291338	1.0	1.0
KEGG_ALPHA_LINOLENIC_ACID_METABOLISM	0.33759758	1.0078566999999998	0.43089432	1.0	1.0
REACTOME_SIGNALING_BY_ROBO_RECEPTOR	0.36032155	1.0071139	0.45021644	1.0	1.0
KEGG_RIG_I_LIKE_RECEPTOR_SIGNALING_PATHWAY	0.26327515	1.0031085	0.46530613	1.0	1.0
REACTOME_CD28_DEPENDENT_PI3K_AKT_SIGNALING	0.33470365	1.0030168	0.41700405	1.0	1.0
REACTOME_RNA_POL_III_TRANSCRIPTION	0.29880336	1.0011106	0.47600000000000003	1.0	1.0
REACTOME_SIGNALLING_BY_NGF	0.20991443	0.9937504999999999	0.47490346	1.0	1.0
KEGG_PRIMARY_IMMUNODEFICIENCY	0.36941224	0.99259293	0.46391752	1.0	1.0
REACTOME_INTRINSIC_PATHWAY	0.3735945	0.99088794	0.48109242	1.0	1.0
REACTOME_APC_C_CDC20_MEDIATED_DEGRADATION_OF_CYCLIN_B	0.43618244	0.98688436	0.49899799999999994	1.0	1.0
KEGG_GLUTATHIONE_METABOLISM	0.40965109999999993	0.9845204	0.49795082	1.0	1.0
REACTOME_MHC_CLASS_II_ANTIGEN_PRESENTATION	0.30530983	0.98203653	0.46185568	1.0	1.0
REACTOME_EXTRACELLULAR_MATRIX_ORGANIZATION	0.35662913	0.9817078000000001	0.47975707	1.0	1.0
REACTOME_ALPHA_LINOLENIC_ACID_ALA_METABOLISM	0.46913123	0.98097044	0.5229885	1.0	1.0
REACTOME_ACYL_CHAIN_REMODELLING_OF_PC	0.333771	1.0081445	0.46666667	1.0	1.0
REACTOME_NEF_MEDIATES_DOWN_MODULATION_OF_CELL_SURFACE_RECEPTORS_BY_RECRUITING_THEM_TO_CLATHRIN_ADAPTERS	0.353881	1.0295539	0.44181459999999995	1.0	1.0
BIOCARTA_CLASSIC_PATHWAY	0.5729314	1.0304296	0.4793713	1.0	1.0
REACTOME_O_LINKED_GLYCOSYLATION_OF_MUCINS	0.34972724	1.0316476	0.4121212	1.0	1.0
REACTOME_THE_ROLE_OF_NEF_IN_HIV1_REPLICATION_AND_DISEASE_PATHOGENESIS	0.36200732	1.0794774	0.34631148	1.0	1.0
BIOCARTA_CARM_ER_PATHWAY	0.36012109999999997	1.0789825000000002	0.38054967	1.0	1.0
REACTOME_POL_SWITCHING	0.42144832	1.0779749	0.37278107	1.0	1.0
KEGG_GLYCOSAMINOGLYCAN_BIOSYNTHESIS_HEPARAN_SULFATE	0.34677659999999993	1.0767018999999998	0.32995949999999996	1.0	1.0
BIOCARTA_EIF2_PATHWAY	0.48093927	1.0737461000000001	0.37721023	1.0	1.0
REACTOME_TRAF6_MEDIATED_IRF7_ACTIVATION_IN_TLR7_8_OR_9_SIGNALING	0.45397425	1.0735893	0.36382535	1.0	1.0
REACTOME_TRANSLATION	0.33451706	1.0732632	0.41883767	1.0	1.0
REACTOME_AMINO_ACID_SYNTHESIS_AND_INTERCONVERSION_TRANSAMINATION	0.43099719999999997	1.0729946000000001	0.36575052	1.0	1.0
KEGG_GLYCEROLIPID_METABOLISM	0.34437588	1.0717431	0.35394457	1.0	1.0
REACTOME_NONSENSE_MEDIATED_DECAY_ENHANCED_BY_THE_EXON_JUNCTION_COMPLEX	0.32575154	1.0698475	0.44088176	1.0	1.0
REACTOME_RNA_POL_III_TRANSCRIPTION_INITIATION_FROM_TYPE_2_PROMOTER	0.36569440000000003	1.0695903	0.37843138	1.0	1.0
REACTOME_PEROXISOMAL_LIPID_METABOLISM	0.43696547	1.0677834	0.43032786	1.0	1.0
REACTOME_GAP_JUNCTION_TRAFFICKING	0.34330273	1.0664591	0.37322515	1.0	1.0
REACTOME_G_BETA_GAMMA_SIGNALLING_THROUGH_PI3KGAMMA	0.35443282	1.0663096	0.375	1.0	1.0
BIOCARTA_DC_PATHWAY	0.38127944	1.0596277	0.39300412	1.0	1.0
BIOCARTA_PITX2_PATHWAY	0.35051057	1.0556513	0.3882353	1.0	1.0
KEGG_SNARE_INTERACTIONS_IN_VESICULAR_TRANSPORT	0.28586209999999995	1.0550346000000002	0.38683128	1.0	1.0
REACTOME_VITAMIN_B5_PANTOTHENATE_METABOLISM	0.45853710000000003	1.0544323999999998	0.43452382	1.0	1.0
REACTOME_MRNA_CAPPING	0.41489044	1.0522885	0.46341464	1.0	1.0
REACTOME_MRNA_DECAY_BY_3_TO_5_EXORIBONUCLEASE	0.5227483	1.0460017	0.5030303	1.0	1.0
REACTOME_RECRUITMENT_OF_NUMA_TO_MITOTIC_CENTROSOMES	0.5618675999999999	1.0438617000000001	0.47758284	1.0	1.0
BIOCARTA_FEEDER_PATHWAY	0.36917877	1.0406853999999999	0.40944883	1.0	1.0
REACTOME_PKB_MEDIATED_EVENTS	0.30287329999999996	1.0393561	0.38922155	1.0	1.0
REACTOME_COPI_MEDIATED_TRANSPORT	0.48255086	1.0361004	0.44624746	1.0	1.0
REACTOME_BOTULINUM_NEUROTOXICITY	0.2947281	1.0330808	0.38495576	1.0	1.0
REACTOME_RNA_POL_II_PRE_TRANSCRIPTION_EVENTS	0.36020252	1.033056	0.47389558	1.0	1.0
REACTOME_G_PROTEIN_BETA_GAMMA_SIGNALLING	0.32487172	1.0327728	0.42355370000000003	1.0	1.0
KEGG_HOMOLOGOUS_RECOMBINATION	0.33593747	1.0326985999999998	0.40688258	1.0	1.0
REACTOME_MITOTIC_G2_G2_M_PHASES	0.29540804	1.0322379000000002	0.43	1.0	1.0
REACTOME_HYALURONAN_METABOLISM	0.36345859999999997	0.9807118	0.44842106	1.0	1.0
REACTOME_HYALURONAN_UPTAKE_AND_DEGRADATION	0.39823702	0.97982264	0.4663951	1.0	1.0
BIOCARTA_BARRESTIN_SRC_PATHWAY	0.34725416	0.9793912	0.48622048	1.0	1.0
REACTOME_IMMUNOREGULATORY_INTERACTIONS_BETWEEN_A_LYMPHOID_AND_A_NON_LYMPHOID_CELL	0.35188824	0.9784484	0.48594376	1.0	1.0
KEGG_DNA_REPLICATION	0.33235437	0.9372444	0.5521472	1.0	1.0
REACTOME_CONVERSION_FROM_APC_C_CDC20_TO_APC_C_CDH1_IN_LATE_ANAPHASE	0.39724879999999996	0.9358550999999999	0.54901963	1.0	1.0
REACTOME_BASIGIN_INTERACTIONS	0.27311903	0.9356687	0.5483871	1.0	1.0
REACTOME_LATE_PHASE_OF_HIV_LIFE_CYCLE	0.28734540000000003	0.9354645	0.570297	1.0	1.0
REACTOME_SIGNALING_BY_NOTCH4	0.3528726	0.93487835	0.55666006	1.0	1.0
KEGG_PURINE_METABOLISM	0.23282756	0.9333878000000001	0.6039604000000001	1.0	1.0
REACTOME_METABOLISM_OF_CARBOHYDRATES	0.21653281	0.933372	0.58299595	1.0	1.0
BIOCARTA_MPR_PATHWAY	0.3200963	0.93009263	0.544	1.0	1.0
REACTOME_GLUCONEOGENESIS	0.3195201	0.9288141	0.5329341	1.0	1.0
KEGG_COMPLEMENT_AND_COAGULATION_CASCADES	0.34648314	0.9280835999999999	0.5379999999999999	1.0	1.0
REACTOME_RNA_POL_III_TRANSCRIPTION_TERMINATION	0.34666622	0.92746365	0.5328031999999999	1.0	1.0
REACTOME_INTRINSIC_PATHWAY_FOR_APOPTOSIS	0.27583453	0.92628694	0.5351044	1.0	1.0
BIOCARTA_IGF1MTOR_PATHWAY	0.36454302	0.92537934	0.5872689999999999	1.0	1.0
BIOCARTA_MITOCHONDRIA_PATHWAY	0.31260857	0.92351073	0.5536398	1.0	1.0
REACTOME_CHOLESTEROL_BIOSYNTHESIS	0.41653842	0.92104524	0.5668016	1.0	1.0
REACTOME_MITOCHONDRIAL_FATTY_ACID_BETA_OXIDATION	0.40677226	0.9175658000000001	0.5659229	1.0	1.0
BIOCARTA_ERK5_PATHWAY	0.32615447	0.9156540000000001	0.59921414	1.0	1.0
REACTOME_SPHINGOLIPID_METABOLISM	0.26353857	0.9150251	0.5995935	1.0	1.0
REACTOME_EARLY_PHASE_OF_HIV_LIFE_CYCLE	0.31842309999999996	0.9129823	0.5601578	1.0	1.0
REACTOME_TRANSFERRIN_ENDOCYTOSIS_AND_RECYCLING	0.32379413	0.91291296	0.56302524	1.0	1.0
REACTOME_TRAFFICKING_OF_AMPA_RECEPTORS	0.2848662	0.9096874	0.5964567	1.0	1.0
REACTOME_RORA_ACTIVATES_CIRCADIAN_EXPRESSION	0.2944741	0.90780175	0.5492958	1.0	1.0
REACTOME_ADP_SIGNALLING_THROUGH_P2RY12	0.32288130000000004	0.9055450999999999	0.572314	1.0	1.0
BIOCARTA_SARS_PATHWAY	0.3896619	0.90490705	0.6387755	1.0	1.0
REACTOME_FORMATION_OF_INCISION_COMPLEX_IN_GG_NER	0.36113003	0.9038252	0.61569417	1.0	1.0
KEGG_PORPHYRIN_AND_CHLOROPHYLL_METABOLISM	0.3371136	0.9032911	0.60816324	1.0	1.0
REACTOME_INTEGRIN_CELL_SURFACE_INTERACTIONS	0.29958832	0.90323305	0.57057655	1.0	1.0
BIOCARTA_RARRXR_PATHWAY	0.3256055	0.9018955	0.6012145999999999	1.0	1.0
REACTOME_PI_3K_CASCADE	0.25763297	0.9013039	0.61730766	1.0	1.0
KEGG_SPHINGOLIPID_METABOLISM	0.30847399999999997	0.9372485999999999	0.5443786999999999	1.0	1.0
REACTOME_POST_CHAPERONIN_TUBULIN_FOLDING_PATHWAY	0.5791396	1.0802686000000001	0.47034764	1.0	1.0
REACTOME_LIPID_DIGESTION_MOBILIZATION_AND_TRANSPORT	0.31168807	0.93784994	0.5313131	1.0	1.0
REACTOME_RESPONSE_TO_ELEVATED_PLATELET_CYTOSOLIC_CA2_	0.30835363	0.94005185	0.5461847	1.0	1.0
REACTOME_HDL_MEDIATED_LIPID_TRANSPORT	0.39658135	0.97833765	0.52208835	1.0	1.0
REACTOME_LIPOPROTEIN_METABOLISM	0.33293954	0.97817034	0.4653846	1.0	1.0
REACTOME_NGF_SIGNALLING_VIA_TRKA_FROM_THE_PLASMA_MEMBRANE	0.22990131	0.9778915000000001	0.49616858	1.0	1.0
BIOCARTA_P35ALZHEIMERS_PATHWAY	0.43680444	0.9777738000000001	0.5174538	1.0	1.0
BIOCARTA_MCM_PATHWAY	0.37129045	0.9757353000000001	0.46356276	1.0	1.0
KEGG_INSULIN_SIGNALING_PATHWAY	0.22849117	0.97498465	0.51717174	1.0	1.0
REACTOME_HIV_LIFE_CYCLE	0.28660944	0.9706844000000001	0.5179282999999999	1.0	1.0
REACTOME_RNA_POL_II_TRANSCRIPTION_PRE_INITIATION_AND_PROMOTER_OPENING	0.33024406	0.96603656	0.542	1.0	1.0
BIOCARTA_MEF2D_PATHWAY	0.33198779999999994	0.96502477	0.48225468	1.0	1.0
KEGG_NOTCH_SIGNALING_PATHWAY	0.30533066	0.9631337999999999	0.5392354	1.0	1.0
REACTOME_TGF_BETA_RECEPTOR_SIGNALING_ACTIVATES_SMADS	0.3031413	0.9618837	0.49591836	1.0	1.0
REACTOME_CHYLOMICRON_MEDIATED_LIPID_TRANSPORT	0.37746740000000006	0.960483	0.48975793	1.0	1.0
KEGG_RIBOSOME	0.33395424	0.96022624	0.51836735	1.0	1.0
REACTOME_SLBP_DEPENDENT_PROCESSING_OF_REPLICATION_DEPENDENT_HISTONE_PRE_MRNAS	0.41548002	0.9601076999999999	0.49707603	1.0	1.0
REACTOME_LAGGING_STRAND_SYNTHESIS	0.3414761	0.9544981	0.51345754	1.0	1.0
REACTOME_ACTIVATION_OF_KAINATE_RECEPTORS_UPON_GLUTAMATE_BINDING	0.2801445	0.9541738000000001	0.5400411	1.0	1.0
REACTOME_NCAM1_INTERACTIONS	0.33068657	0.95272577	0.49695740000000005	1.0	1.0
KEGG_TAURINE_AND_HYPOTAURINE_METABOLISM	0.4224375	0.9512359	0.49290059999999997	1.0	1.0
REACTOME_NOTCH_HLH_TRANSCRIPTION_PATHWAY	0.3437429	0.9494577	0.5292887	1.0	1.0
REACTOME_ABACAVIR_TRANSPORT_AND_METABOLISM	0.42953270000000005	0.94854546	0.5579999999999999	1.0	1.0
REACTOME_SIGNALING_BY_SCF_KIT	0.23991975	0.9457937	0.56751466	1.0	1.0
BIOCARTA_GLYCOLYSIS_PATHWAY	0.39759654	0.9453706000000001	0.5434343	1.0	1.0
REACTOME_TGF_BETA_RECEPTOR_SIGNALING_IN_EMT_EPITHELIAL_TO_MESENCHYMAL_TRANSITION	0.28739917	0.94481593	0.5474308000000001	1.0	1.0
REACTOME_TRAFFICKING_OF_GLUR2_CONTAINING_AMPA_RECEPTORS	0.38262206	0.9436075999999999	0.55060726	1.0	1.0
REACTOME_THROMBOXANE_SIGNALLING_THROUGH_TP_RECEPTOR	0.31463706	0.9429815999999999	0.526971	1.0	1.0
REACTOME_DOWNSTREAM_SIGNAL_TRANSDUCTION	0.23366173	0.9421523	0.57421875	1.0	1.0
REACTOME_THE_ACTIVATION_OF_ARYLSULFATASES	0.4613776	0.9406514000000001	0.56082475	1.0	1.0
REACTOME_RNA_POL_II_TRANSCRIPTION	0.28266567	0.94034934	0.5364373	1.0	1.0
REACTOME_GLYCOLYSIS	0.30792722	0.9401771999999999	0.550813	1.0	1.0
BIOCARTA_CELL2CELL_PATHWAY	0.33638614	0.9383684000000001	0.5623722	1.0	1.0
REACTOME_SYNTHESIS_AND_INTERCONVERSION_OF_NUCLEOTIDE_DI_AND_TRIPHOSPHATES	0.46973544	1.0814768	0.34545454	1.0	1.0
REACTOME_SRP_DEPENDENT_COTRANSLATIONAL_PROTEIN_TARGETING_TO_MEMBRANE	0.33579105	1.0822525	0.41104296	1.0	1.0
REACTOME_PROSTACYCLIN_SIGNALLING_THROUGH_PROSTACYCLIN_RECEPTOR	0.38624406	1.0824573	0.34303534	1.0	1.0
REACTOME_CALNEXIN_CALRETICULIN_CYCLE	0.6163628000000001	1.2918534	0.18600000000000003	1.0	1.0
REACTOME_REGULATION_OF_INSULIN_LIKE_GROWTH_FACTOR_IGF_ACTIVITY_BY_INSULIN_LIKE_GROWTH_FACTOR_BINDING_PROTEINS_IGFBPS	0.66976297	1.2852455	0.17330678	1.0	1.0
REACTOME_ELONGATION_ARREST_AND_RECOVERY	0.5430986999999999	1.2832357	0.20119523	1.0	1.0
BIOCARTA_BARRESTIN_PATHWAY	0.552357	1.2830445	0.1809145	1.0	1.0
KEGG_SULFUR_METABOLISM	0.5369786999999999	1.2777101	0.19402985	1.0	1.0
REACTOME_SYNTHESIS_OF_SUBSTRATES_IN_N_GLYCAN_BIOSYTHESIS	0.64286244	1.2750226	0.16498993	1.0	1.0
KEGG_GLYCOSPHINGOLIPID_BIOSYNTHESIS_GLOBO_SERIES	0.48808149	1.2725811000000002	0.19635628	1.0	1.0
KEGG_ABC_TRANSPORTERS	0.39643642	1.2714298000000002	0.1211499	1.0	1.0
KEGG_LYSOSOME	0.32376084	1.2700453999999999	0.13061224	1.0	1.0
BIOCARTA_CASPASE_PATHWAY	0.40085256	1.2695371000000002	0.16317992	1.0	1.0
REACTOME_PROCESSIVE_SYNTHESIS_ON_THE_LAGGING_STRAND	0.49992466	1.2681215000000001	0.23838384	1.0	1.0
BIOCARTA_HIVNEF_PATHWAY	0.3668622	1.2669376	0.15337424	1.0	1.0
KEGG_GALACTOSE_METABOLISM	0.49609107	1.2599694	0.154	1.0	1.0
REACTOME_N_GLYCAN_ANTENNAE_ELONGATION_IN_THE_MEDIAL_TRANS_GOLGI	0.36865738	1.248105	0.1796875	1.0	1.0
REACTOME_DEGRADATION_OF_THE_EXTRACELLULAR_MATRIX	0.45107633	1.2466763	0.19214876	1.0	1.0
KEGG_PYRIMIDINE_METABOLISM	0.39212918	1.2417016	0.15682282	1.0	1.0
KEGG_PANTOTHENATE_AND_COA_BIOSYNTHESIS	0.46404865	1.2392361	0.18554688	1.0	1.0
BIOCARTA_RANMS_PATHWAY	0.5263306999999999	1.2308383	0.25153375	1.0	1.0
REACTOME_INTERFERON_ALPHA_BETA_SIGNALING	0.43967026	1.2233722	0.23780487	1.0	1.0
REACTOME_PROTEOLYTIC_CLEAVAGE_OF_SNARE_COMPLEX_PROTEINS	0.3791437	1.2220659999999999	0.16702820000000002	1.0	1.0
REACTOME_DNA_STRAND_ELONGATION	0.46996477	1.2160739999999999	0.27991885	1.0	1.0
REACTOME_EXTENSION_OF_TELOMERES	0.44399276	1.214456	0.2597137	1.0	1.0
REACTOME_METABOLISM_OF_VITAMINS_AND_COFACTORS	0.3796025	1.2111882999999999	0.22244094	1.0	1.0
REACTOME_CELL_EXTRACELLULAR_MATRIX_INTERACTIONS	0.55103403	1.2090513999999999	0.29504952	1.0	1.0
KEGG_FRUCTOSE_AND_MANNOSE_METABOLISM	0.41962048	1.2053976	0.24760076	1.0	1.0
KEGG_NICOTINATE_AND_NICOTINAMIDE_METABOLISM	0.48028016	1.204611	0.22598870000000001	1.0	1.0
BIOCARTA_PTDINS_PATHWAY	0.4231313	1.2045226	0.23517786	1.0	1.0
BIOCARTA_SODD_PATHWAY	0.525033	1.2019103	0.26626018	1.0	1.0
BIOCARTA_COMP_PATHWAY	0.6286514	1.1994987	0.26035503	1.0	1.0
REACTOME_VIRAL_MESSENGER_RNA_SYNTHESIS	0.5758614000000001	1.2949704	0.17425743	1.0	1.0
REACTOME_FORMATION_OF_THE_TERNARY_COMPLEX_AND_SUBSEQUENTLY_THE_43S_COMPLEX	0.4473442	1.195806	0.32270917	1.0	1.0
REACTOME_CASPASE_MEDIATED_CLEAVAGE_OF_CYTOSKELETAL_PROTEINS	0.5468698000000001	1.2967539	0.13267326	1.0	1.0
REACTOME_MTORC1_MEDIATED_SIGNALLING	0.5733965	1.3017566	0.18036072	1.0	1.0
BIOCARTA_NUCLEARRS_PATHWAY	0.56012493	1.6620598000000002	0.038383837999999997	1.0	0.85
REACTOME_RETROGRADE_NEUROTROPHIN_SIGNALLING	0.68505204	1.6090658000000002	0.012096774	1.0	0.9209999999999999
BIOCARTA_CHEMICAL_PATHWAY	0.5071047000000001	1.5571003	0.045009784000000004	1.0	0.966
REACTOME_GLYCEROPHOSPHOLIPID_BIOSYNTHESIS	0.42187890000000006	1.4921223	0.023952097000000002	1.0	0.995
REACTOME_RESOLUTION_OF_AP_SITES_VIA_THE_MULTIPLE_NUCLEOTIDE_PATCH_REPLACEMENT_PATHWAY	0.67790645	1.4642058999999998	0.05222437	1.0	0.997
REACTOME_APOBEC3G_MEDIATED_RESISTANCE_TO_HIV1_INFECTION	0.8257365	1.4579383999999997	0.022044089	1.0	0.998
KEGG_GLYCEROPHOSPHOLIPID_METABOLISM	0.41454098	1.4471717	0.02020202	1.0	0.9990000000000001
REACTOME_REMOVAL_OF_THE_FLAP_INTERMEDIATE_FROM_THE_C_STRAND	0.6552475	1.4460540000000002	0.06122449	1.0	0.9990000000000001
REACTOME_TRAFFICKING_AND_PROCESSING_OF_ENDOSOMAL_TLR	0.61008877	1.4147235	0.07786885	1.0	1.0
REACTOME_GLYCOSPHINGOLIPID_METABOLISM	0.42582914	1.4024012	0.08488612599999999	1.0	1.0
REACTOME_BASE_EXCISION_REPAIR	0.6436068	1.3924653999999999	0.07858546	1.0	1.0
REACTOME_SYNTHESIS_OF_PE	0.6121283000000001	1.3896445	0.086872585	1.0	1.0
REACTOME_METABOLISM_OF_PORPHYRINS	0.67963934	1.3893429	0.078947365	1.0	1.0
REACTOME_SYNTHESIS_OF_BILE_ACIDS_AND_BILE_SALTS_VIA_7ALPHA_HYDROXYCHOLESTEROL	0.59857285	1.3882084	0.11224489999999998	1.0	1.0
REACTOME_BASE_FREE_SUGAR_PHOSPHATE_REMOVAL_VIA_THE_SINGLE_NUCLEOTIDE_REPLACEMENT_PATHWAY	0.68008083	1.3800297	0.103174604	1.0	1.0
REACTOME_PYRIMIDINE_METABOLISM	0.53311306	1.3797263000000002	0.1015625	1.0	1.0
REACTOME_N_GLYCAN_TRIMMING_IN_THE_ER_AND_CALNEXIN_CALRETICULIN_CYCLE	0.64986706	1.3684003	0.11623246	1.0	1.0
REACTOME_SYNTHESIS_OF_PA	0.40399557	1.365983	0.07505071	1.0	1.0
REACTOME_UNWINDING_OF_DNA	0.7127764	1.365567	0.15725806	1.0	1.0
REACTOME_RECYCLING_PATHWAY_OF_L1	0.42543146	1.3549746999999999	0.114718616	1.0	1.0
BIOCARTA_P53_PATHWAY	0.48323303	1.3527871	0.14913958	1.0	1.0
REACTOME_ABORTIVE_ELONGATION_OF_HIV1_TRANSCRIPT_IN_THE_ABSENCE_OF_TAT	0.54879963	1.352725	0.12228797	1.0	1.0
KEGG_BASE_EXCISION_REPAIR	0.5093622	1.3439596	0.14800000000000002	1.0	1.0
KEGG_RIBOFLAVIN_METABOLISM	0.45120168	1.328811	0.15503876	1.0	1.0
REACTOME_INITIAL_TRIGGERING_OF_COMPLEMENT	0.7662071999999999	1.3241998	0.136	1.0	1.0
REACTOME_ABCA_TRANSPORTERS_IN_LIPID_HOMEOSTASIS	0.4818402	1.3189325	0.11642411	1.0	1.0
REACTOME_PIP3_ACTIVATES_AKT_SIGNALING	0.4866224	1.3179839	0.14038461	1.0	1.0
BIOCARTA_AHSP_PATHWAY	0.5768268	1.3106964	0.15336135	1.0	1.0
BIOCARTA_IL4_PATHWAY	0.47676533	1.3093587	0.1183432	1.0	1.0
REACTOME_RESOLUTION_OF_AP_SITES_VIA_THE_SINGLE_NUCLEOTIDE_REPLACEMENT_PATHWAY	0.6243041	1.2968203	0.17159763	1.0	1.0
REACTOME_COMPLEMENT_CASCADE	0.42651862	0.9012234	0.5801217	1.0	1.0
REACTOME_SIGNAL_REGULATORY_PROTEIN_SIRP_FAMILY_INTERACTIONS	0.4751567	1.1951152	0.2729124	1.0	1.0
KEGG_GLYCOSAMINOGLYCAN_BIOSYNTHESIS_CHONDROITIN_SULFATE	0.44437718	1.1941028	0.21497121	1.0	1.0
REACTOME_BIOSYNTHESIS_OF_THE_N_GLYCAN_PRECURSOR_DOLICHOL_LIPID_LINKED_OLIGOSACCHARIDE_LLO_AND_TRANSFER_TO_A_NASCENT_PROTEIN	0.49086344	1.1381898000000001	0.30658436	1.0	1.0
KEGG_MTOR_SIGNALING_PATHWAY	0.30478218	1.1379788	0.25447315	1.0	1.0
REACTOME_INFLUENZA_VIRAL_RNA_TRANSCRIPTION_AND_REPLICATION	0.38296962	1.1361511	0.38276553	1.0	1.0
REACTOME_METABOLISM_OF_PROTEINS	0.31555140000000004	1.1357238	0.33061224	1.0	1.0
KEGG_RNA_POLYMERASE	0.40926009999999996	1.1353527	0.34349594	1.0	1.0
REACTOME_ACYL_CHAIN_REMODELLING_OF_PG	0.40687692	1.1340431	0.29183674	1.0	1.0
REACTOME_NEGATIVE_REGULATION_OF_THE_PI3K_AKT_NETWORK	0.5205316	1.1311488	0.29614604	1.0	1.0
REACTOME_NUCLEOTIDE_EXCISION_REPAIR	0.3959581	1.1304518999999997	0.35860655	1.0	1.0
KEGG_AMINO_SUGAR_AND_NUCLEOTIDE_SUGAR_METABOLISM	0.44970655	1.1299691	0.30861723	1.0	1.0
KEGG_OTHER_GLYCAN_DEGRADATION	0.53524446	1.124632	0.35042736	1.0	1.0
KEGG_GLYCINE_SERINE_AND_THREONINE_METABOLISM	0.3658813	1.1170917999999999	0.2877551	1.0	1.0
REACTOME_FORMATION_OF_THE_HIV1_EARLY_ELONGATION_COMPLEX	0.45916635	1.1118186	0.42020202	1.0	1.0
REACTOME_FORMATION_OF_TRANSCRIPTION_COUPLED_NER_TC_NER_REPAIR_COMPLEX	0.45140470000000005	1.1117562	0.4052953	1.0	1.0
KEGG_N_GLYCAN_BIOSYNTHESIS	0.3631703	1.1072565	0.33537832	1.0	1.0
REACTOME_EXTRINSIC_PATHWAY_FOR_APOPTOSIS	0.36506745	1.104084	0.31622177	1.0	1.0
REACTOME_REPAIR_SYNTHESIS_FOR_GAP_FILLING_BY_DNA_POL_IN_TC_NER	0.4277215999999999	1.1034075	0.33537832	1.0	1.0
REACTOME_3_UTR_MEDIATED_TRANSLATIONAL_REGULATION	0.37601823	1.1000468	0.4	1.0	1.0
REACTOME_METABOLISM_OF_NUCLEOTIDES	0.37158757	1.0974822	0.32661290000000004	1.0	1.0
REACTOME_SIGNAL_TRANSDUCTION_BY_L1	0.278007	1.097266	0.33739838	1.0	1.0
REACTOME_MITOCHONDRIAL_PROTEIN_IMPORT	0.41520637	1.0969659	0.41358024	1.0	1.0
BIOCARTA_TALL1_PATHWAY	0.45606017	1.0954281000000001	0.37398374	1.0	1.0
REACTOME_PI3K_AKT_ACTIVATION	0.3714567	1.094998	0.34416825	1.0	1.0
REACTOME_GLUCAGON_TYPE_LIGAND_RECEPTORS	0.31914437	1.0944787	0.32776618	1.0	1.0
REACTOME_ACTIVATION_OF_THE_PRE_REPLICATIVE_COMPLEX	0.38715014	1.0938047	0.37171718	1.0	1.0
REACTOME_INFLUENZA_LIFE_CYCLE	0.2987594	1.0935353	0.37821782	1.0	1.0
REACTOME_GAB1_SIGNALOSOME	0.37466136	1.0934204	0.36706350000000004	1.0	1.0
REACTOME_PEPTIDE_CHAIN_ELONGATION	0.38514715	1.0899863	0.41733869999999995	1.0	1.0
KEGG_GLYOXYLATE_AND_DICARBOXYLATE_METABOLISM	0.40520743	1.0897201	0.33727809999999997	1.0	1.0
REACTOME_ACYL_CHAIN_REMODELLING_OF_PE	0.36795859999999997	1.0841593999999999	0.37037036	1.0	1.0
REACTOME_PYRIMIDINE_CATABOLISM	0.59158933	1.1401098	0.32539684	1.0	1.0
REACTOME_MICRORNA_MIRNA_BIOGENESIS	0.49641064	1.1950733999999998	0.30039525	1.0	1.0
REACTOME_LOSS_OF_NLP_FROM_MITOTIC_CENTROSOMES	0.3573137	1.1409018	0.30985916	1.0	1.0
REACTOME_SYNTHESIS_OF_BILE_ACIDS_AND_BILE_SALTS_VIA_24_HYDROXYCHOLESTEROL	0.5395699	1.1423383999999999	0.29065040000000003	1.0	1.0
REACTOME_POST_TRANSLATIONAL_PROTEIN_MODIFICATION	0.3192859	1.1894715	0.18540435	1.0	1.0
BIOCARTA_MTA3_PATHWAY	0.59817827	1.1887156	0.2851485	1.0	1.0
REACTOME_PURINE_CATABOLISM	0.61378765	1.1880525	0.28514057	1.0	1.0
REACTOME_ENDOSOMAL_SORTING_COMPLEX_REQUIRED_FOR_TRANSPORT_ESCRT	0.5542239000000001	1.187223	0.29862475	1.0	1.0
REACTOME_DNA_REPAIR	0.36845598	1.1843436999999999	0.29795918	1.0	1.0
REACTOME_ABC_FAMILY_PROTEINS_MEDIATED_TRANSPORT	0.3814647	1.1841916000000001	0.19057377	1.0	1.0
BIOCARTA_SRCRPTP_PATHWAY	0.46290267	1.1820931000000001	0.27217743	1.0	1.0
BIOCARTA_DEATH_PATHWAY	0.3637464	1.1773182	0.23246492	1.0	1.0
REACTOME_ASPARAGINE_N_LINKED_GLYCOSYLATION	0.3735668	1.1763991000000003	0.25	1.0	1.0
REACTOME_ACTIVATION_OF_IRF3_IRF7_MEDIATED_BY_TBK1_IKK_EPSILON	0.54723495	1.1757911	0.23809524	1.0	1.0
REACTOME_RNA_POL_III_TRANSCRIPTION_INITIATION_FROM_TYPE_3_PROMOTER	0.3769774	1.1749564	0.28404668	1.0	1.0
REACTOME_ACTIVATION_OF_THE_MRNA_UPON_BINDING_OF_THE_CAP_BINDING_COMPLEX_AND_EIFS_AND_SUBSEQUENT_BINDING_TO_43S	0.43488526	1.1746172	0.31451613	1.0	1.0
KEGG_PENTOSE_PHOSPHATE_PATHWAY	0.43198400000000003	1.1743257	0.24809161	1.0	1.0
REACTOME_CREATION_OF_C4_AND_C2_ACTIVATORS	0.6933866	1.1735136999999998	0.31901840000000004	1.0	1.0
REACTOME_PTM_GAMMA_CARBOXYLATION_HYPUSINE_FORMATION_AND_ARYLSULFATASE_ACTIVATION	0.40173369999999997	1.1691632	0.27021277	1.0	1.0
BIOCARTA_DNAFRAGMENT_PATHWAY	0.5618496000000001	1.1676301000000002	0.27309236	1.0	1.0
REACTOME_RECRUITMENT_OF_MITOTIC_CENTROSOME_PROTEINS_AND_COMPLEXES	0.37328354	1.1661388000000001	0.29841897	1.0	1.0
REACTOME_ACYL_CHAIN_REMODELLING_OF_PS	0.41377148	1.1656563	0.252	1.0	1.0
KEGG_BLADDER_CANCER	0.40187186	1.1653870000000002	0.23353294	1.0	1.0
REACTOME_ENOS_ACTIVATION_AND_REGULATION	0.42278279999999996	1.160102	0.22941177	1.0	1.0
REACTOME_MEMBRANE_BINDING_AND_TARGETTING_OF_GAG_PROTEINS	0.61659664	1.1550562	0.32581967	1.0	1.0
REACTOME_FORMATION_OF_RNA_POL_II_ELONGATION_COMPLEX_	0.4701686	1.1484917	0.38339922	1.0	1.0
REACTOME_TRANSCRIPTION_COUPLED_NER_TC_NER	0.41923645	1.1484061	0.33470225	1.0	1.0
KEGG_O_GLYCAN_BIOSYNTHESIS	0.43293267	1.1469877	0.29591838	1.0	1.0
REACTOME_MRNA_SPLICING_MINOR_PATHWAY	0.420688	1.1462727	0.36111109999999996	1.0	1.0
REACTOME_REGULATORY_RNA_PATHWAYS	0.47743800000000003	1.1454966	0.35458168	1.0	1.0
KEGG_VALINE_LEUCINE_AND_ISOLEUCINE_BIOSYNTHESIS	0.43701890000000004	1.145109	0.2674897	1.0	1.0
REACTOME_TRAF3_DEPENDENT_IRF_ACTIVATION_PATHWAY	0.44426823	1.1439011000000001	0.31589538	1.0	1.0
REACTOME_PHOSPHOLIPID_METABOLISM	0.27155867	1.1438583	0.21900827	1.0	1.0
REACTOME_ACTIVATION_OF_CHAPERONE_GENES_BY_XBP1S	0.41786605	1.1421682	0.32995949999999996	1.0	1.0
BIOCARTA_P53HYPOXIA_PATHWAY	0.34478977	0.90006363	0.6046064999999999	1.0	1.0
REACTOME_VOLTAGE_GATED_POTASSIUM_CHANNELS	0.29059559999999995	0.89854985	0.5539419	1.0	1.0
KEGG_ECM_RECEPTOR_INTERACTION	0.33110252	0.89692324	0.58381504	1.0	1.0
REACTOME_MITOTIC_G1_G1_S_PHASES	0.19914079999999998	0.6755778	0.8674464	1.0	1.0
BIOCARTA_LONGEVITY_PATHWAY	0.29028255	0.6750878	0.87007874	1.0	1.0
BIOCARTA_TID_PATHWAY	0.23235615	0.6741145000000001	0.8981289000000001	1.0	1.0
REACTOME_PLATELET_ACTIVATION_SIGNALING_AND_AGGREGATION	0.17258434	0.67202556	0.9791232	1.0	1.0
REACTOME_SCF_BETA_TRCP_MEDIATED_DEGRADATION_OF_EMI1	0.24701288	0.6712585999999999	0.8580121999999999	1.0	1.0
BIOCARTA_UCALPAIN_PATHWAY	0.23023568	0.6686308000000001	0.81	1.0	1.0
REACTOME_APC_C_CDC20_MEDIATED_DEGRADATION_OF_MITOTIC_PROTEINS	0.24094631	0.6675268	0.8546169	1.0	1.0
REACTOME_CREB_PHOSPHORYLATION_THROUGH_THE_ACTIVATION_OF_RAS	0.19281042	0.66732407	0.9070248	1.0	1.0
REACTOME_INTERACTION_BETWEEN_L1_AND_ANKYRINS	0.22938426	0.6648921	0.8147409999999999	1.0	1.0
REACTOME_HOMOLOGOUS_RECOMBINATION_REPAIR_OF_REPLICATION_INDEPENDENT_DOUBLE_STRAND_BREAKS	0.20531449	0.6620661	0.8917835999999999	1.0	1.0
KEGG_LEUKOCYTE_TRANSENDOTHELIAL_MIGRATION	0.17891918	0.66066647	0.9458414	1.0	1.0
REACTOME_PHASE_II_CONJUGATION	0.21704890000000002	0.6575263000000001	0.9754601	1.0	1.0
REACTOME_METABOLISM_OF_NON_CODING_RNA	0.20659789999999997	0.65566206	0.85215604	1.0	1.0
REACTOME_P38MAPK_EVENTS	0.23621778	0.65325904	0.9382716	1.0	1.0
REACTOME_REGULATION_OF_COMPLEMENT_CASCADE	0.35964906	0.65219414	0.86503065	1.0	1.0
KEGG_NATURAL_KILLER_CELL_MEDIATED_CYTOTOXICITY	0.16455185	0.65095	0.9241517	1.0	1.0
REACTOME_ACTIVATED_NOTCH1_TRANSMITS_SIGNAL_TO_THE_NUCLEUS	0.22525674	0.64996755	0.91649693	1.0	1.0
REACTOME_ORC1_REMOVAL_FROM_CHROMATIN	0.21538223	0.6497387	0.8969697	1.0	1.0
REACTOME_ASSEMBLY_OF_THE_PRE_REPLICATIVE_COMPLEX	0.22751778	0.6462726	0.8433735000000001	1.0	1.0
BIOCARTA_ETC_PATHWAY	0.28411752	0.6436923000000001	0.8424242000000001	1.0	1.0
REACTOME_NFKB_IS_ACTIVATED_AND_SIGNALS_SURVIVAL	0.3156441	0.6435475	0.8616351999999999	1.0	1.0
REACTOME_SEMAPHORIN_INTERACTIONS	0.20872502	0.6434861	0.904	1.0	1.0
REACTOME_NFKB_ACTIVATION_THROUGH_FADD_RIP1_PATHWAY_MEDIATED_BY_CASPASE_8_AND10	0.22497596	0.6430813	0.89344263	1.0	1.0
REACTOME_REGULATION_OF_IFNA_SIGNALING	0.2183495	0.6410031	0.8586724	1.0	1.0
BIOCARTA_AMI_PATHWAY	0.25314626	0.6407813	0.92231077	1.0	1.0
BIOCARTA_MCALPAIN_PATHWAY	0.20251086	0.6376741	0.93846154	1.0	1.0
REACTOME_CROSS_PRESENTATION_OF_SOLUBLE_EXOGENOUS_ANTIGENS_ENDOSOMES	0.22246183	0.6327229999999999	0.9148514999999999	1.0	1.0
REACTOME_TRIGLYCERIDE_BIOSYNTHESIS	0.22177963	0.62838876	0.978	1.0	1.0
BIOCARTA_THELPER_PATHWAY	0.31082085	0.62437236	0.8539095	1.0	1.0
REACTOME_STRIATED_MUSCLE_CONTRACTION	0.24751088	0.67643446	0.9133858	1.0	1.0
REACTOME_E2F_MEDIATED_REGULATION_OF_DNA_REPLICATION	0.23841389	0.61834437	0.8454198	1.0	1.0
REACTOME_ERKS_ARE_INACTIVATED	0.27535909999999997	0.67664117	0.8593449000000001	1.0	1.0
REACTOME_HS_GAG_BIOSYNTHESIS	0.22277126	0.679157	0.96062994	1.0	1.0
REACTOME_ACTIVATION_OF_ATR_IN_RESPONSE_TO_REPLICATION_STRESS	0.25212285	0.72746694	0.73333335	1.0	1.0
REACTOME_PURINE_METABOLISM	0.27825567	0.7271169	0.83366734	1.0	1.0
REACTOME_VIF_MEDIATED_DEGRADATION_OF_APOBEC3G	0.27066278	0.72472376	0.7775550999999999	1.0	1.0
BIOCARTA_ACTINY_PATHWAY	0.26447108	0.723391	0.8099808000000001	1.0	1.0
REACTOME_GLUCAGON_SIGNALING_IN_METABOLIC_REGULATION	0.22070745	0.72329396	0.9414226000000001	1.0	1.0
KEGG_PYRUVATE_METABOLISM	0.22654834	0.7205252	0.8922764000000001	1.0	1.0
REACTOME_CELL_CYCLE_CHECKPOINTS	0.22643600000000003	0.7164835	0.80078125	1.0	1.0
KEGG_FOCAL_ADHESION	0.21155424	0.7138178000000001	0.8639053	1.0	1.0
BIOCARTA_NKT_PATHWAY	0.26310459999999997	0.71367073	0.79324055	1.0	1.0
REACTOME_GLUTATHIONE_CONJUGATION	0.26255253	0.71054614	0.9103870000000001	1.0	1.0
REACTOME_APC_C_CDH1_MEDIATED_DEGRADATION_OF_CDC20_AND_OTHER_APC_C_CDH1_TARGETED_PROTEINS_IN_LATE_MITOSIS_EARLY_G1	0.24482203	0.7083332	0.83299387	1.0	1.0
REACTOME_RNA_POL_I_RNA_POL_III_AND_MITOCHONDRIAL_TRANSCRIPTION	0.19683	0.70744324	0.86836517	1.0	1.0
BIOCARTA_STATHMIN_PATHWAY	0.27018026	0.7073116	0.84031934	1.0	1.0
REACTOME_TRANSCRIPTION	0.18230191	0.70264655	0.86105263	1.0	1.0
REACTOME_NRIF_SIGNALS_CELL_DEATH_FROM_THE_NUCLEUS	0.24712722	0.7020427	0.84928715	1.0	1.0
REACTOME_CELL_JUNCTION_ORGANIZATION	0.21947458	0.701792	0.88030887	1.0	1.0
KEGG_ALZHEIMERS_DISEASE	0.20189907	0.70096993	0.8518519	1.0	1.0
BIOCARTA_NFKB_PATHWAY	0.23988470000000003	0.7005821999999999	0.8458498	1.0	1.0
REACTOME_IL_7_SIGNALING	0.28199857	0.6996886999999999	0.8530021000000001	1.0	1.0
BIOCARTA_ACH_PATHWAY	0.23196046	0.6971809	0.84812623	1.0	1.0
REACTOME_PROCESSING_OF_CAPPED_INTRONLESS_PRE_MRNA	0.235609	0.69402444	0.81359226	1.0	1.0
REACTOME_P75_NTR_RECEPTOR_MEDIATED_SIGNALLING	0.15402718	0.69397	0.95334685	1.0	1.0
REACTOME_SEMA3A_PLEXIN_REPULSION_SIGNALING_BY_INHIBITING_INTEGRIN_ADHESION	0.3048728	0.69141096	0.8703704	1.0	1.0
REACTOME_TRNA_AMINOACYLATION	0.2312236	0.6896084	0.7886179	1.0	1.0
REACTOME_LATENT_INFECTION_OF_HOMO_SAPIENS_WITH_MYCOBACTERIUM_TUBERCULOSIS	0.20733890000000002	0.6856165	0.94081634	1.0	1.0
REACTOME_SIGNALING_BY_NOTCH2	0.2586992	0.684684	0.88955826	1.0	1.0
REACTOME_APOPTOSIS	0.1895405	0.6841786999999999	0.93346775	1.0	1.0
KEGG_CARDIAC_MUSCLE_CONTRACTION	0.19262777	0.68352497	0.87525564	1.0	1.0
BIOCARTA_PLATELETAPP_PATHWAY	0.29240137	0.67957217	0.875	1.0	1.0
REACTOME_MITOTIC_PROMETAPHASE	0.20951642	0.67883015	0.8560158000000001	1.0	1.0
REACTOME_FORMATION_OF_TUBULIN_FOLDING_INTERMEDIATES_BY_CCT_TRIC	0.34975702	0.7293438	0.79083663	1.0	1.0
REACTOME_ACTIVATED_TAK1_MEDIATES_P38_MAPK_ACTIVATION	0.1944803	0.61604017	0.94008267	1.0	1.0
REACTOME_DESTABILIZATION_OF_MRNA_BY_AUF1_HNRNP_D0	0.24038205	0.6131245	0.8917835999999999	1.0	1.0
REACTOME_FANCONI_ANEMIA_PATHWAY	0.1503987	0.46199024	0.9896906999999999	1.0	1.0
REACTOME_POTASSIUM_CHANNELS	0.13129258	0.45929158	1.0	1.0	1.0
BIOCARTA_IL22BP_PATHWAY	0.15365548	0.45731700000000003	0.9938144	1.0	1.0
REACTOME_GROWTH_HORMONE_RECEPTOR_SIGNALING	0.13821016	0.44984624	0.9980732	1.0	1.0
REACTOME_TRAF6_MEDIATED_INDUCTION_OF_NFKB_AND_MAP_KINASES_UPON_TLR7_8_OR_9_ACTIVATION	-0.3953972	-1.5097521999999999	0.040084388	1.0	0.995
BIOCARTA_EPO_PATHWAY	-0.56205815	-1.5068233999999998	0.05421687	1.0	0.995
BIOCARTA_RANKL_PATHWAY	-0.6283734999999999	-1.5050054	0.053149607	1.0	0.995
REACTOME_MYD88_MAL_CASCADE_INITIATED_ON_PLASMA_MEMBRANE	-0.40825808	-1.503768	0.0373444	1.0	0.995
BIOCARTA_ARENRF2_PATHWAY	-0.67622066	-1.5005008	0.046025105	1.0	0.995
BIOCARTA_IL3_PATHWAY	-0.59848446	-1.4932631	0.034	1.0	0.995
REACTOME_MAPK_TARGETS_NUCLEAR_EVENTS_MEDIATED_BY_MAP_KINASES	-0.47993383	-1.4857243999999998	0.060728744	1.0	0.996
BIOCARTA_41BB_PATHWAY	-0.48886874	-1.4847575000000002	0.053304903	1.0	0.996
BIOCARTA_GLEEVEC_PATHWAY	-0.56048757	-1.4741118999999998	0.06066536	1.0	0.998
REACTOME_MAP_KINASE_ACTIVATION_IN_TLR_CASCADE	-0.40338323	-1.469907	0.048780486	1.0	0.9990000000000001
REACTOME_ACTIVATED_POINT_MUTANTS_OF_FGFR2	-0.5652943	-1.4677527	0.05645161	1.0	0.9990000000000001
BIOCARTA_IL5_PATHWAY	-0.74697983	-1.4670296	0.04133858	1.0	0.9990000000000001
BIOCARTA_CDMAC_PATHWAY	-0.6743545999999999	-1.4633338	0.064718165	1.0	1.0
BIOCARTA_IL6_PATHWAY	-0.59025794	-1.4612005	0.069815196	1.0	1.0
REACTOME_UNBLOCKING_OF_NMDA_RECEPTOR_GLUTAMATE_BINDING_AND_ACTIVATION	-0.59551173	-1.4602754999999998	0.04809619	1.0	1.0
BIOCARTA_CXCR4_PATHWAY	-0.52978754	-1.4435003	0.10344828	1.0	1.0
REACTOME_TIE2_SIGNALING	-0.57975656	-1.4423069	0.035928145	1.0	1.0
BIOCARTA_DREAM_PATHWAY	-0.6496938	-1.4318478000000001	0.057613168	1.0	1.0
BIOCARTA_SPRY_PATHWAY	-0.5975559	-1.4191943	0.09979633	1.0	1.0
REACTOME_GRB2_EVENTS_IN_ERBB2_SIGNALING	-0.551933	-1.4107473	0.044715445	1.0	1.0
REACTOME_SIGNALING_BY_BMP	-0.59987336	-1.4064778999999998	0.09960160000000001	1.0	1.0
REACTOME_SYNTHESIS_SECRETION_AND_INACTIVATION_OF_GLP1	-0.613585	-1.4061397	0.070866145	1.0	1.0
BIOCARTA_IL1R_PATHWAY	-0.4387026	-1.3995351999999999	0.10447761400000001	1.0	1.0
REACTOME_IL1_SIGNALING	-0.45217574	-1.3976752000000001	0.12676056	1.0	1.0
BIOCARTA_TGFB_PATHWAY	-0.46772364	-1.3940542999999999	0.09710744	1.0	1.0
BIOCARTA_FIBRINOLYSIS_PATHWAY	0.19868384	0.46543717	0.9959184000000001	1.0	1.0
REACTOME_AMYLOIDS	0.18036655	0.6133721	0.9504132	1.0	1.0
BIOCARTA_EPONFKB_PATHWAY	0.19651593	0.46880928	0.9766082	1.0	1.0
KEGG_TRYPTOPHAN_METABOLISM	0.13441306	0.49098083	1.0	1.0	1.0
BIOCARTA_BIOPEPTIDES_PATHWAY	0.14628519	0.6041002	0.9629629999999999	1.0	1.0
KEGG_VALINE_LEUCINE_AND_ISOLEUCINE_DEGRADATION	0.21161397	0.60162085	0.90618765	1.0	1.0
REACTOME_G2_M_CHECKPOINTS	0.21517801	0.60028756	0.862	1.0	1.0
KEGG_ANTIGEN_PROCESSING_AND_PRESENTATION	0.18781047	0.5989993	0.92105263	1.0	1.0
REACTOME_CDK_MEDIATED_PHOSPHORYLATION_AND_REMOVAL_OF_CDC6	0.21724992	0.59868264	0.91434264	1.0	1.0
REACTOME_REGULATION_OF_MITOTIC_CELL_CYCLE	0.19712707	0.5957496	0.9481038	1.0	1.0
KEGG_HEDGEHOG_SIGNALING_PATHWAY	0.16747107	0.59565544	0.9707030999999999	1.0	1.0
KEGG_BETA_ALANINE_METABOLISM	0.20576910000000004	0.5923289	0.9758065	1.0	1.0
REACTOME_PURINE_SALVAGE	0.26222432	0.5900504	0.9593023	1.0	1.0
KEGG_PROTEASOME	0.22541223	0.58958346	0.89285713	1.0	1.0
REACTOME_METAL_ION_SLC_TRANSPORTERS	0.2329005	0.58758056	0.9502982	1.0	1.0
REACTOME_OPSINS	0.2636489	0.58180285	0.9444444	1.0	1.0
REACTOME_RESPIRATORY_ELECTRON_TRANSPORT_ATP_SYNTHESIS_BY_CHEMIOSMOTIC_COUPLING_AND_HEAT_PRODUCTION_BY_UNCOUPLING_PROTEINS_	0.23404315	0.58155054	0.87090164	1.0	1.0
REACTOME_DEADENYLATION_DEPENDENT_MRNA_DECAY	0.16748498	0.58095986	0.95247525	1.0	1.0
REACTOME_P53_INDEPENDENT_G1_S_DNA_DAMAGE_CHECKPOINT	0.20665637	0.5789350000000001	0.9229248999999999	1.0	1.0
REACTOME_REGULATION_OF_MRNA_STABILITY_BY_PROTEINS_THAT_BIND_AU_RICH_ELEMENTS	0.1986619	0.574059	0.94129556	1.0	1.0
REACTOME_AUTODEGRADATION_OF_THE_E3_UBIQUITIN_LIGASE_COP1	0.21424124	0.5715352	0.9436620000000001	1.0	1.0
KEGG_OXIDATIVE_PHOSPHORYLATION	0.19926767	0.571503	0.88565487	1.0	1.0
BIOCARTA_TCYTOTOXIC_PATHWAY	0.29572043	0.57006705	0.8954918	1.0	1.0
REACTOME_GLYCOGEN_BREAKDOWN_GLYCOGENOLYSIS	0.21582474	0.5699865	0.9792530999999999	1.0	1.0
KEGG_BASAL_CELL_CARCINOMA	0.16420344	0.56680804	0.97333336	1.0	1.0
BIOCARTA_CTL_PATHWAY	0.24424736	0.5578930000000001	0.8915187	1.0	1.0
REACTOME_SEMA3A_PAK_DEPENDENT_AXON_REPULSION	0.2015308	0.53958493	0.9461078000000002	1.0	1.0
REACTOME_IRAK2_MEDIATED_ACTIVATION_OF_TAK1_COMPLEX_UPON_TLR7_8_OR_9_STIMULATION	0.20585389999999998	0.53431356	0.9857434000000002	1.0	1.0
KEGG_TERPENOID_BACKBONE_BIOSYNTHESIS	0.24278226	0.52700573	0.9249011999999999	1.0	1.0
REACTOME_PD1_SIGNALING	0.25530434	0.5226162	0.9470468000000001	1.0	1.0
REACTOME_REGULATION_OF_IFNG_SIGNALING	0.18036552	0.51640713	0.9861933	1.0	1.0
KEGG_PARKINSONS_DISEASE	0.17066689999999998	0.5146087	0.9686191999999999	1.0	1.0
REACTOME_PECAM1_INTERACTIONS	0.20767960000000002	0.4960843	0.97979796	1.0	1.0
REACTOME_RESPIRATORY_ELECTRON_TRANSPORT	0.20007671	0.47625697	0.95218295	1.0	1.0
REACTOME_DOWNREGULATION_OF_SMAD2_3_SMAD4_TRANSCRIPTIONAL_ACTIVITY	-0.47611794	-1.3865926000000002	0.10612245	1.0	1.0
REACTOME_AKT_PHOSPHORYLATES_TARGETS_IN_THE_CYTOSOL	0.29506758	0.72989196	0.82011604	1.0	1.0
REACTOME_PURINE_RIBONUCLEOSIDE_MONOPHOSPHATE_BIOSYNTHESIS	0.35531893	0.73342276	0.7282378	1.0	1.0
REACTOME_PLATELET_SENSITIZATION_BY_LDL	0.31246009999999996	0.8588687	0.6252545999999999	1.0	1.0
BIOCARTA_P38MAPK_PATHWAY	0.24835497	0.8551298	0.6615385	1.0	1.0
REACTOME_RIG_I_MDA5_MEDIATED_INDUCTION_OF_IFN_ALPHA_BETA_PATHWAYS	0.21935463	0.85484076	0.7305389	1.0	1.0
KEGG_FOLATE_BIOSYNTHESIS	0.33151909999999996	0.85343736	0.6484375	1.0	1.0
REACTOME_DOWNSTREAM_SIGNALING_OF_ACTIVATED_FGFR	0.2096245	0.8531681000000001	0.75791436	1.0	1.0
REACTOME_SULFUR_AMINO_ACID_METABOLISM	0.32868996	0.8498857	0.6659919	1.0	1.0
KEGG_GLYCOSAMINOGLYCAN_BIOSYNTHESIS_KERATAN_SULFATE	0.30756038	0.8491834999999999	0.66935486	1.0	1.0
REACTOME_ADP_SIGNALLING_THROUGH_P2RY1	0.2720598	0.8486186	0.7016460999999999	1.0	1.0
REACTOME_SYNTHESIS_OF_PC	0.3042567	0.8474179000000001	0.7094862	1.0	1.0
KEGG_RNA_DEGRADATION	0.26217055	0.8460218	0.6738703	1.0	1.0
REACTOME_CELL_CYCLE_MITOTIC	0.23177285	0.84563637	0.6437008000000001	1.0	1.0
REACTOME_INNATE_IMMUNE_SYSTEM	0.22364356	0.84424317	0.69411767	1.0	1.0
REACTOME_INTERFERON_GAMMA_SIGNALING	0.29467797	0.8404514999999999	0.636	1.0	1.0
REACTOME_SYNTHESIS_OF_BILE_ACIDS_AND_BILE_SALTS	0.31787583	0.8391316999999999	0.72210956	1.0	1.0
REACTOME_ION_TRANSPORT_BY_P_TYPE_ATPASES	0.2606341	0.83572626	0.73253495	1.0	1.0
REACTOME_MUSCLE_CONTRACTION	0.32293177	0.835061	0.65407556	1.0	1.0
REACTOME_HOST_INTERACTIONS_OF_HIV_FACTORS	0.24699279999999998	0.83503264	0.69649804	1.0	1.0
REACTOME_GAP_JUNCTION_DEGRADATION	0.35888347	0.8346838	0.72672063	1.0	1.0
REACTOME_PHOSPHORYLATION_OF_THE_APC_C	0.35230523	0.8341083	0.64541835	1.0	1.0
REACTOME_FATTY_ACID_TRIACYLGLYCEROL_AND_KETONE_BODY_METABOLISM	0.21392897	0.8314097	0.75403225	1.0	1.0
BIOCARTA_AKAP95_PATHWAY	0.38296276	0.83095294	0.68662673	1.0	1.0
REACTOME_ADAPTIVE_IMMUNE_SYSTEM	0.19976725	0.8289429	0.7919191999999999	1.0	1.0
REACTOME_INHIBITION_OF_THE_PROTEOLYTIC_ACTIVITY_OF_APC_C_REQUIRED_FOR_THE_ONSET_OF_ANAPHASE_BY_MITOTIC_SPINDLE_CHECKPOINT_COMPONENTS	0.38304588	0.8286950999999999	0.67722774	1.0	1.0
REACTOME_GENERATION_OF_SECOND_MESSENGER_MOLECULES	0.33640423	0.8262443000000002	0.6807611	1.0	1.0
REACTOME_PROTEIN_FOLDING	0.31821805	0.8257969000000001	0.6739563000000001	1.0	1.0
REACTOME_POST_NMDA_RECEPTOR_ACTIVATION_EVENTS	0.23505965	0.8249303	0.6995885000000001	1.0	1.0
KEGG_SPLICEOSOME	0.28716794	0.82492006	0.67813766	1.0	1.0
REACTOME_APC_CDC20_MEDIATED_DEGRADATION_OF_NEK2A	0.35066640000000004	0.82413775	0.6531008	1.0	1.0
BIOCARTA_TRKA_PATHWAY	0.33077216	0.82115483	0.71850395	1.0	1.0
REACTOME_HEPARAN_SULFATE_HEPARIN_HS_GAG_METABOLISM	0.2586696	0.8592699	0.75247526	1.0	1.0
KEGG_LYSINE_DEGRADATION	0.21665572	0.8188764000000001	0.8342966999999999	1.0	1.0
REACTOME_DIABETES_PATHWAYS	0.24107565	0.8597530000000001	0.6952191	1.0	1.0
KEGG_NUCLEOTIDE_EXCISION_REPAIR	0.28406012	0.86060756	0.6504065	1.0	1.0
REACTOME_HIV_INFECTION	0.25601968	0.8922040999999999	0.6067194	1.0	1.0
KEGG_HUNTINGTONS_DISEASE	0.27219309999999997	0.8912167999999999	0.591195	1.0	1.0
KEGG_AMINOACYL_TRNA_BIOSYNTHESIS	0.30116627	0.89005226	0.5926680000000001	1.0	1.0
REACTOME_UNFOLDED_PROTEIN_RESPONSE	0.28470498	0.8893306999999999	0.6031746	1.0	1.0
REACTOME_ANTIVIRAL_MECHANISM_BY_IFN_STIMULATED_GENES	0.2658198	0.88710976	0.57504874	1.0	1.0
KEGG_SELENOAMINO_ACID_METABOLISM	0.28900266	0.8857735999999999	0.6265305999999999	1.0	1.0
REACTOME_DAG_AND_IP3_SIGNALING	0.26572594	0.88539547	0.6321138000000001	1.0	1.0
REACTOME_ACYL_CHAIN_REMODELLING_OF_PI	0.3264683	0.8843981	0.61122245	1.0	1.0
REACTOME_MRNA_SPLICING	0.28214586	0.8840763	0.58019805	1.0	1.0
REACTOME_TERMINATION_OF_O_GLYCAN_BIOSYNTHESIS	0.4027785	0.8812515999999999	0.637827	1.0	1.0
REACTOME_THROMBIN_SIGNALLING_THROUGH_PROTEINASE_ACTIVATED_RECEPTORS_PARS	0.24179079	0.8810034999999999	0.65656567	1.0	1.0
KEGG_ARACHIDONIC_ACID_METABOLISM	0.27328109999999994	0.8808623999999999	0.6606786	1.0	1.0
REACTOME_IRON_UPTAKE_AND_TRANSPORT	0.29612413	0.8790638000000001	0.66462165	1.0	1.0
BIOCARTA_SALMONELLA_PATHWAY	0.34456447	0.87902856	0.612	1.0	1.0
BIOCARTA_EIF4_PATHWAY	0.29529333	0.87856907	0.6422925	1.0	1.0
REACTOME_OTHER_SEMAPHORIN_INTERACTIONS	0.32795104	0.87775946	0.6599189999999999	1.0	1.0
BIOCARTA_AKAPCENTROSOME_PATHWAY	0.33122298	0.87660563	0.6358149000000001	1.0	1.0
BIOCARTA_RELA_PATHWAY	0.33031934	0.8758120999999999	0.6372549	1.0	1.0
REACTOME_TANDEM_PORE_DOMAIN_POTASSIUM_CHANNELS	0.40968552	0.8756021	0.62222224	1.0	1.0
KEGG_PPAR_SIGNALING_PATHWAY	0.3060643	0.87455237	0.66935486	1.0	1.0
KEGG_PATHOGENIC_ESCHERICHIA_COLI_INFECTION	0.32591745	0.8719224	0.6130952	1.0	1.0
REACTOME_NCAM_SIGNALING_FOR_NEURITE_OUT_GROWTH	0.2509047	0.871411	0.62603307	1.0	1.0
REACTOME_ANTIGEN_PROCESSING_CROSS_PRESENTATION	0.2866712	0.8713778	0.6188604999999999	1.0	1.0
KEGG_NON_HOMOLOGOUS_END_JOINING	0.33121055	0.86740804	0.6019802	1.0	1.0
BIOCARTA_INTRINSIC_PATHWAY	0.31481177	0.8671728000000001	0.6686747	1.0	1.0
REACTOME_MEMBRANE_TRAFFICKING	0.23700094	0.86631244	0.7004049	1.0	1.0
KEGG_TIGHT_JUNCTION	0.22796749	0.86542726	0.66930693	1.0	1.0
REACTOME_SIGNALING_BY_NOTCH3	0.34005317	0.8636273000000001	0.6471774	1.0	1.0
KEGG_GLYCOSAMINOGLYCAN_DEGRADATION	0.2967557	0.8609311	0.6344969	1.0	1.0
BIOCARTA_HSP27_PATHWAY	0.31861675	0.8597568999999999	0.6407767	1.0	1.0
REACTOME_TRAF6_MEDIATED_INDUCTION_OF_TAK1_COMPLEX	0.33138216	0.7313706	0.83137256	1.0	1.0
REACTOME_METABOLISM_OF_MRNA	0.23247021	0.81730103	0.67729086	1.0	1.0
REACTOME_METABOLISM_OF_RNA	0.22712	0.81446624	0.67741936	1.0	1.0
BIOCARTA_MTOR_PATHWAY	0.2908392	0.7688206999999999	0.7296748000000001	1.0	1.0
REACTOME_PREFOLDIN_MEDIATED_TRANSFER_OF_SUBSTRATE_TO_CCT_TRIC	0.33512336	0.7683079	0.75049114	1.0	1.0
KEGG_ETHER_LIPID_METABOLISM	0.25157315	0.76798743	0.7904564000000001	1.0	1.0
REACTOME_MITOTIC_M_M_G1_PHASES	0.22332688	0.7655930999999999	0.7402344	1.0	1.0
REACTOME_IKK_COMPLEX_RECRUITMENT_MEDIATED_BY_RIP1	0.37956855	0.76466215	0.8083004	1.0	1.0
REACTOME_RNA_POL_I_TRANSCRIPTION_INITIATION	0.2976379	0.7644048000000001	0.7790927	1.0	1.0
KEGG_BIOSYNTHESIS_OF_UNSATURATED_FATTY_ACIDS	0.28998318	0.76134515	0.7852883	1.0	1.0
REACTOME_SYNTHESIS_OF_PIPS_AT_THE_GOLGI_MEMBRANE	0.27410743	0.76100403	0.7352342	1.0	1.0
REACTOME_MITOCHONDRIAL_TRNA_AMINOACYLATION	0.29319870000000003	0.757998	0.75101215	1.0	1.0
REACTOME_SIGNALLING_TO_RAS	0.22549926	0.7578439	0.80265653	1.0	1.0
REACTOME_G1_S_SPECIFIC_TRANSCRIPTION	0.34249684	0.7545655	0.7306968	1.0	1.0
REACTOME_BRANCHED_CHAIN_AMINO_ACID_CATABOLISM	0.30841395	0.7526581999999999	0.7617108	1.0	1.0
REACTOME_THE_NLRP3_INFLAMMASOME	0.29987657	0.7525331000000001	0.8258317	1.0	1.0
REACTOME_AXON_GUIDANCE	0.18025665	0.75189745	0.8798370999999999	1.0	1.0
BIOCARTA_LECTIN_PATHWAY	0.33842847	0.7511548000000001	0.7808219	1.0	1.0
REACTOME_GLUCOSE_METABOLISM	0.222775	0.7486326	0.8212851000000001	1.0	1.0
REACTOME_MRNA_PROCESSING	0.22249067	0.74846566	0.7191234999999999	1.0	1.0
REACTOME_INFLAMMASOMES	0.2541511	0.74795985	0.8683206	1.0	1.0
REACTOME_ORGANIC_CATION_ANION_ZWITTERION_TRANSPORT	0.31409872	0.7466109999999999	0.77932405	1.0	1.0
REACTOME_TELOMERE_MAINTENANCE	0.22806695	0.7460713000000001	0.7626050999999999	1.0	1.0
REACTOME_L1CAM_INTERACTIONS	0.17729282	0.74495345	0.88039213	1.0	1.0
REACTOME_N_GLYCAN_ANTENNAE_ELONGATION	0.25553936	0.7434178000000001	0.7675350999999999	1.0	1.0
KEGG_PEROXISOME	0.22084647	0.74326867	0.8171206	1.0	1.0
REACTOME_RNA_POL_I_TRANSCRIPTION_TERMINATION	0.31729808	0.74208593	0.8220000000000001	1.0	1.0
KEGG_STEROID_BIOSYNTHESIS	0.33089897	0.7413144	0.8110883000000001	1.0	1.0
REACTOME_DESTABILIZATION_OF_MRNA_BY_KSRP	0.2763073	0.7411249	0.7906504	1.0	1.0
REACTOME_SMOOTH_MUSCLE_CONTRACTION	0.35790109999999997	0.73971003	0.722449	1.0	1.0
REACTOME_OPIOID_SIGNALLING	0.19089365	0.7378186	0.9014675	1.0	1.0
REACTOME_DEVELOPMENTAL_BIOLOGY	0.16310576	0.7344807	0.9450101999999999	1.0	1.0
KEGG_LIMONENE_AND_PINENE_DEGRADATION	0.28554702	0.77060264	0.74549097	1.0	1.0
REACTOME_COSTIMULATION_BY_THE_CD28_FAMILY	0.24571876	0.81454366	0.70600414	1.0	1.0
REACTOME_TRANSCRIPTIONAL_REGULATION_OF_WHITE_ADIPOCYTE_DIFFERENTIATION	0.25344905	0.77221704	0.8149688	1.0	1.0
REACTOME_HORMONE_SENSITIVE_LIPASE_HSL_MEDIATED_TRIACYLGLYCEROL_HYDROLYSIS	0.3684335	0.77280235	0.7614108	1.0	1.0
REACTOME_DESTABILIZATION_OF_MRNA_BY_BRF1	0.33051005	0.8142782	0.72783506	1.0	1.0
REACTOME_G_PROTEIN_ACTIVATION	0.24688669	0.8131863	0.7368420999999999	1.0	1.0
REACTOME_ANTIGEN_PRESENTATION_FOLDING_ASSEMBLY_AND_PEPTIDE_LOADING_OF_CLASS_I_MHC	0.33622462	0.81253475	0.67261904	1.0	1.0
REACTOME_PPARA_ACTIVATES_GENE_EXPRESSION	0.21239826	0.80750585	0.8082191999999999	1.0	1.0
BIOCARTA_TEL_PATHWAY	0.2859271	0.8047105	0.7061144	1.0	1.0
REACTOME_ENDOSOMAL_VACUOLAR_PATHWAY	0.42143887	0.80290055	0.6983805999999999	1.0	1.0
REACTOME_SIGNAL_AMPLIFICATION	0.23741995	0.8025135999999999	0.79793817	1.0	1.0
REACTOME_CELL_CYCLE	0.20851053	0.80082196	0.7370518	1.0	1.0
BIOCARTA_KREB_PATHWAY	0.4064804	0.8003471999999999	0.7044024999999999	1.0	1.0
REACTOME_TRAF6_MEDIATED_IRF7_ACTIVATION	0.26813567	0.79827815	0.7685774999999999	1.0	1.0
REACTOME_IMMUNE_SYSTEM	0.18796319	0.79569167	0.85341364	1.0	1.0
REACTOME_ACTIVATED_AMPK_STIMULATES_FATTY_ACID_OXIDATION_IN_MUSCLE	0.2536158	0.7925201999999999	0.7164461	1.0	1.0
REACTOME_CITRIC_ACID_CYCLE_TCA_CYCLE	0.35479915	0.7917335	0.6776181	1.0	1.0
REACTOME_METABOLISM_OF_AMINO_ACIDS_AND_DERIVATIVES	0.21430700000000003	0.7911100999999999	0.84156376	1.0	1.0
REACTOME_SYNTHESIS_OF_DNA	0.24447666	0.7898723000000001	0.7131630999999999	1.0	1.0
REACTOME_DNA_REPLICATION	0.22772154	0.7883425000000001	0.7128906	1.0	1.0
REACTOME_REGULATED_PROTEOLYSIS_OF_P75NTR	0.30278033	0.788212	0.72895277	1.0	1.0
REACTOME_CRMPS_IN_SEMA3A_SIGNALING	0.30231193	0.7837887	0.6904276999999999	1.0	1.0
KEGG_VIBRIO_CHOLERAE_INFECTION	0.22244094	0.7832292	0.82965934	1.0	1.0
REACTOME_ZINC_TRANSPORTERS	0.33426556	0.7830501999999999	0.7601547	1.0	1.0
KEGG_CITRATE_CYCLE_TCA_CYCLE	0.30030423	0.78181833	0.70541084	1.0	1.0
REACTOME_ER_PHAGOSOME_PATHWAY	0.29260790000000003	0.7815408	0.7009901	1.0	1.0
REACTOME_COLLAGEN_FORMATION	0.31725988	0.7810824000000001	0.754	1.0	1.0
REACTOME_ELEVATION_OF_CYTOSOLIC_CA2_LEVELS	0.33737645	0.78081584	0.6910229999999999	1.0	1.0
REACTOME_TETRAHYDROBIOPTERIN_BH4_SYNTHESIS_RECYCLING_SALVAGE_AND_REGULATION	0.30641013	0.78059596	0.8241107	1.0	1.0
REACTOME_PROCESSING_OF_CAPPED_INTRON_CONTAINING_PRE_MRNA	0.23626618	0.77916795	0.6760563	1.0	1.0
REACTOME_CYTOSOLIC_SULFONATION_OF_SMALL_MOLECULES	0.31367606	0.7781988000000001	0.7442827	1.0	1.0
REACTOME_TRANSPORT_TO_THE_GOLGI_AND_SUBSEQUENT_MODIFICATION	0.22138423	0.7736206999999999	0.78244275	1.0	1.0
REACTOME_M_G1_TRANSITION	0.25047895	0.7728132	0.7195121999999999	1.0	1.0
REACTOME_HS_GAG_DEGRADATION	0.30251187	0.7727399	0.82	1.0	1.0
REACTOME_SYNTHESIS_SECRETION_AND_DEACYLATION_OF_GHRELIN	-0.6654241	-1.4474995000000002	0.062626265	1.0	1.0
