# Supplementary material for: A Systematic Framework for Drug Repositioning from Integrated Omics and Drug Phenotype Profiles Using Pathway-Drug Network
Source: Biomed Res Int. 2016 Dec 26;2016:7147039. doi: 10.1155/2016/7147039 (PMC5233404; doi:10.1155/2016/7147039)
Supplement: Supplementary file 4 [file 7147039.f4.txt]

# ES : Enrichment Score
# NES : Normalized Enrichment Score
# NOM pvalue : Nominal p-value
# FDR : False Discovery Rate
# FWER : Familywise-error Rate
# For detail explanation of each scores refer to http://software.broadinstitute.org/gsea/doc/GSEAUserGuideFrame.html
NAME	ES	NES	NOM p-val	FDR q-val	FWER p-val
REACTOME_METABOLISM_OF_NON_CODING_RNA	-0.5196834	-1.423049	0.15527950000000001	0.40409932	1.0
KEGG_LEISHMANIA_INFECTION	-0.5655784	-1.4239614999999999	0.14643545	0.40512059999999994	1.0
REACTOME_G1_S_TRANSITION	-0.5665124	-1.4243264	0.12083333	0.40696420000000005	1.0
REACTOME_METABOLISM_OF_NUCLEOTIDES	-0.49830067	-1.4266736999999998	0.06903353	0.4071079	1.0
REACTOME_INTERFERON_GAMMA_SIGNALING	-0.6062789000000001	-1.4277628999999998	0.138	0.40745149999999997	1.0
REACTOME_DNA_STRAND_ELONGATION	-0.69109666	-1.4285605	0.12793177	0.40869918	1.0
REACTOME_IMMUNE_SYSTEM	-0.40090412	-1.424784	0.100196466	0.4088134	1.0
BIOCARTA_NO2IL12_PATHWAY	-0.700339	-1.4153347	0.14455445	0.41093270000000004	1.0
BIOCARTA_INFLAM_PATHWAY	-0.49061546	-1.4287508	0.10420842	0.41134208	1.0
REACTOME_CONVERSION_FROM_APC_C_CDC20_TO_APC_C_CDH1_IN_LATE_ANAPHASE	-0.6547969	-1.4297847	0.071283095	0.41198438	1.0
REACTOME_CDT1_ASSOCIATION_WITH_THE_CDC6_ORC_ORIGIN_COMPLEX	-0.550887	-1.4154919	0.13267326	0.41345766	1.0
REACTOME_MITOTIC_G1_G1_S_PHASES	-0.53364474	-1.4165354	0.12552302	0.41374690000000003	1.0
REACTOME_DOWNREGULATION_OF_TGF_BETA_RECEPTOR_SIGNALING	-0.49327479999999996	-1.417567	0.10337972	0.4142915	1.0
KEGG_ONE_CARBON_POOL_BY_FOLATE	-0.54539186	-1.4298837	0.10460251	0.41481304	1.0
BIOCARTA_CYTOKINE_PATHWAY	-0.58079153	-1.5128176000000002	0.055999999999999994	0.4151483	1.0
REACTOME_APOBEC3G_MEDIATED_RESISTANCE_TO_HIV1_INFECTION	-0.73440826	-1.4111483	0.08216433	0.41518542	1.0
REACTOME_ORC1_REMOVAL_FROM_CHROMATIN	-0.55149025	-1.429983	0.110887095	0.41772383	1.0
REACTOME_PREFOLDIN_MEDIATED_TRANSFER_OF_SUBSTRATE_TO_CCT_TRIC	-0.57529706	-1.4111931	0.11943319999999999	0.41797349999999994	1.0
BIOCARTA_RHO_PATHWAY	-0.44286686	-1.4305780000000001	0.11923077	0.41952989	1.0
KEGG_PRIMARY_IMMUNODEFICIENCY	-0.66165036	-1.4317837	0.134	0.41974515	1.0
REACTOME_COSTIMULATION_BY_THE_CD28_FAMILY	-0.5047341	-1.4057072	0.14373717	0.41996503	1.0
REACTOME_POST_CHAPERONIN_TUBULIN_FOLDING_PATHWAY	-0.61141974	-1.3757503	0.122047246	0.42017928	1.0
BIOCARTA_CTL_PATHWAY	-0.81758803	-1.4067258	0.07200000000000001	0.4202566	1.0
KEGG_GRAFT_VERSUS_HOST_DISEASE	-0.7330274	-1.5128938	0.05436893	0.42053926	1.0
KEGG_BASAL_TRANSCRIPTION_FACTORS	-0.44872559999999995	-1.3765395	0.11660079	0.42072535	1.0
REACTOME_KINESINS	-0.71594805	-1.3773543	0.13778706	0.42115438	1.0
KEGG_AUTOIMMUNE_THYROID_DISEASE	-0.5925838999999999	-1.4335912	0.14423077	0.42158306	1.0
REACTOME_IONOTROPIC_ACTIVITY_OF_KAINATE_RECEPTORS	-0.58634394	-1.4024448	0.10826772	0.4218814	1.0
KEGG_P53_SIGNALING_PATHWAY	-0.49606222	-1.3812561	0.056565657000000005	0.42218890000000003	1.0
REACTOME_NEPHRIN_INTERACTIONS	-0.5701674	-1.4011805	0.07692308	0.42223728	1.0
REACTOME_CELL_CELL_COMMUNICATION	-0.40846375	-1.4320022	0.03359684	0.4223918	1.0
KEGG_NOD_LIKE_RECEPTOR_SIGNALING_PATHWAY	-0.54889756	-1.4463624	0.06903353	0.42257226	1.0
REACTOME_CYTOKINE_SIGNALING_IN_IMMUNE_SYSTEM	-0.44923377	-1.3999455	0.13387424	0.42267096	1.0
REACTOME_CELL_CYCLE	-0.48109314	-1.406814	0.13519314	0.42291224	1.0
REACTOME_INHIBITION_OF_THE_PROTEOLYTIC_ACTIVITY_OF_APC_C_REQUIRED_FOR_THE_ONSET_OF_ANAPHASE_BY_MITOTIC_SPINDLE_CHECKPOINT_COMPONENTS	-0.7217253	-1.3894641	0.09445585	0.4231519	1.0
REACTOME_METABOLISM_OF_POLYAMINES	-0.65271413	-1.4447376	0.08932039	0.42318457	1.0
REACTOME_ANTIVIRAL_MECHANISM_BY_IFN_STIMULATED_GENES	-0.5386331999999999	-1.3774261	0.13235295	0.42339802	1.0
REACTOME_PEPTIDE_LIGAND_BINDING_RECEPTORS	-0.45845747	-1.3983705	0.056092842999999996	0.4234274	1.0
BIOCARTA_LYM_PATHWAY	-0.78062373	-1.3784829	0.09722222400000001	0.42349705	1.0
KEGG_FC_EPSILON_RI_SIGNALING_PATHWAY	-0.41735992	-1.3796117	0.10707071	0.42351073	1.0
REACTOME_PLATELET_ADHESION_TO_EXPOSED_COLLAGEN	-0.6689803000000001	-1.3816756000000001	0.12871288	0.42357040000000007	1.0
REACTOME_TRYPTOPHAN_CATABOLISM	-0.84986466	-1.3848222	0.056530215	0.42371756	1.0
KEGG_MTOR_SIGNALING_PATHWAY	-0.4012599	-1.3825302	0.064579256	0.42401847	1.0
KEGG_GLYCOSPHINGOLIPID_BIOSYNTHESIS_GANGLIO_SERIES	-0.6583748	-1.4025623999999999	0.09343936	0.42441090000000004	1.0
BIOCARTA_IL7_PATHWAY	-0.6714694	-1.4337538	0.111328125	0.42453359999999996	1.0
REACTOME_SIGNAL_TRANSDUCTION_BY_L1	-0.4365371	-1.5251148	0.051896207	0.42463878	1.0
REACTOME_REGULATION_OF_MITOTIC_CELL_CYCLE	-0.5814590000000001	-1.4400823	0.12723657	0.42493980000000003	1.0
BIOCARTA_ASBCELL_PATHWAY	-0.63810146	-1.365367	0.12883435	0.42498535	1.0
REACTOME_SIGNALLING_TO_ERKS	-0.42200443	-1.3863788000000001	0.097165994	0.42512837	1.0
BIOCARTA_IL17_PATHWAY	-0.74092126	-1.4467248	0.08041237	0.42521499999999995	1.0
REACTOME_CD28_DEPENDENT_PI3K_AKT_SIGNALING	-0.5361077	-1.3963318	0.08730159	0.42554548	1.0
BIOCARTA_TCYTOTOXIC_PATHWAY	-0.8309127000000001	-1.3672183	0.08811475	0.4256071	1.0
REACTOME_ER_PHAGOSOME_PATHWAY	-0.5550341999999999	-1.4411038	0.123791106	0.42573792	1.0
REACTOME_CROSS_PRESENTATION_OF_SOLUBLE_EXOGENOUS_ANTIGENS_ENDOSOMES	-0.52848685	-1.3894781	0.13396226	0.4257496	1.0
REACTOME_P53_INDEPENDENT_G1_S_DNA_DAMAGE_CHECKPOINT	-0.53219086	-1.3828539	0.15127702	0.42575622	1.0
REACTOME_HOST_INTERACTIONS_OF_HIV_FACTORS	-0.47813950000000005	-1.5130609	0.076620825	0.42585522	1.0
REACTOME_AMINO_ACID_TRANSPORT_ACROSS_THE_PLASMA_MEMBRANE	-0.49915025	-1.3849598	0.08080808	0.42593598	1.0
KEGG_NICOTINATE_AND_NICOTINAMIDE_METABOLISM	-0.5822142	-1.3659339	0.11500975	0.42599353	1.0
REACTOME_CREATION_OF_C4_AND_C2_ACTIVATORS	-0.81518084	-1.4423287	0.06451613	0.4260053	1.0
REACTOME_TGF_BETA_RECEPTOR_SIGNALING_ACTIVATES_SMADS	-0.47599912	-1.3949063999999998	0.115079366	0.4261038	1.0
REACTOME_EARLY_PHASE_OF_HIV_LIFE_CYCLE	-0.5908553000000001	-1.3866861000000001	0.13347022	0.42705673	1.0
REACTOME_G2_M_DNA_DAMAGE_CHECKPOINT	-0.8084021	-1.4473664	0.027777778	0.42710772	1.0
KEGG_CYSTEINE_AND_METHIONINE_METABOLISM	-0.47818673	-1.3675716	0.11089866	0.42712736	1.0
REACTOME_PYRIMIDINE_CATABOLISM	-0.8046420999999999	-1.495973	0.026819924	0.42761123	1.0
REACTOME_NUCLEOTIDE_BINDING_DOMAIN_LEUCINE_RICH_REPEAT_CONTAINING_RECEPTOR_NLR_SIGNALING_PATHWAYS	-0.49014685	-1.4338603	0.10556622	0.42777178	1.0
KEGG_PROGESTERONE_MEDIATED_OOCYTE_MATURATION	-0.40665948	-1.3931636	0.08249497	0.42798856	1.0
REACTOME_SIGNALING_BY_THE_B_CELL_RECEPTOR_BCR	-0.4237576	-1.3895453000000002	0.13203883	0.4281864	1.0
KEGG_CYTOKINE_CYTOKINE_RECEPTOR_INTERACTION	-0.49899584	-1.5067469	0.052529182	0.42819676	1.0
REACTOME_REGULATION_OF_SIGNALING_BY_CBL	-0.6176024999999999	-1.437609	0.07113821	0.42824528	1.0
BIOCARTA_RB_PATHWAY	-0.5863898	-1.370088	0.13911289999999998	0.42843690000000006	1.0
REACTOME_G1_S_SPECIFIC_TRANSCRIPTION	-0.8055866999999999	-1.513951	0.026748972000000003	0.42853644	1.0
KEGG_PRION_DISEASES	-0.5962118000000001	-1.5196913	0.044573642000000004	0.42872697	1.0
KEGG_BLADDER_CANCER	-0.49098894	-1.3678997	0.062992126	0.42881125	1.0
REACTOME_NEP_NS2_INTERACTS_WITH_THE_CELLULAR_EXPORT_MACHINERY	-0.572349	-1.4564555000000001	0.1197479	0.42893422	1.0
REACTOME_IL_2_SIGNALING	-0.5289885	-1.5257034	0.069815196	0.42915010000000003	1.0
REACTOME_SEMA3A_PAK_DEPENDENT_AXON_REPULSION	-0.5819608000000001	-1.4479226	0.06378601	0.42926174	1.0
BIOCARTA_SPPA_PATHWAY	-0.51702434	-1.3901201	0.0952381	0.42954746	1.0
REACTOME_E2F_ENABLED_INHIBITION_OF_PRE_REPLICATION_COMPLEX_FORMATION	-0.7863071	-1.4857595	0.04637097	0.42964079999999993	1.0
REACTOME_ADAPTIVE_IMMUNE_SYSTEM	-0.39469072	-1.3705034999999999	0.12040816	0.42986444	1.0
KEGG_MELANOGENESIS	-0.44480625	-1.434337	0.038306452000000005	0.42989707	1.0
REACTOME_BASIGIN_INTERACTIONS	-0.5981506999999999	-1.5170683	0.038535647	0.43007705	1.0
KEGG_CELL_ADHESION_MOLECULES_CAMS	-0.52512634	-1.487169	0.04233871	0.43023729999999993	1.0
REACTOME_APC_C_CDC20_MEDIATED_DEGRADATION_OF_CYCLIN_B	-0.73525286	-1.5151211000000002	0.04	0.43029129999999993	1.0
REACTOME_INTERFERON_SIGNALING	-0.5441269	-1.4501523	0.10615711	0.43049824	1.0
KEGG_AXON_GUIDANCE	-0.34909463	-1.3680955	0.06476191	0.43070212	1.0
REACTOME_APC_C_CDH1_MEDIATED_DEGRADATION_OF_CDC20_AND_OTHER_APC_C_CDH1_TARGETED_PROTEINS_IN_LATE_MITOSIS_EARLY_G1	-0.5675319000000001	-1.4571933000000001	0.11220472	0.43099752	1.0
REACTOME_APC_C_CDC20_MEDIATED_DEGRADATION_OF_MITOTIC_PROTEINS	-0.55563307	-1.3617401000000002	0.16966067	0.43108803	1.0
BIOCARTA_NKT_PATHWAY	-0.61901164	-1.5209841999999998	0.08055010000000001	0.4310889	1.0
REACTOME_SIGNALING_BY_ILS	-0.45680820000000005	-1.4351476	0.08571429	0.43114147	1.0
REACTOME_CELL_CYCLE_MITOTIC	-0.53912324	-1.5020666999999999	0.0968421	0.43131149999999996	1.0
REACTOME_TRANSPORT_OF_MATURE_MRNA_DERIVED_FROM_AN_INTRONLESS_TRANSCRIPT	-0.5578510999999999	-1.4835218000000001	0.09979210000000001	0.43158168	1.0
REACTOME_MITOTIC_PROMETAPHASE	-0.6007132	-1.4964768	0.076271184	0.43162474	1.0
KEGG_T_CELL_RECEPTOR_SIGNALING_PATHWAY	-0.43303266	-1.3903983999999998	0.12195122	0.4316604	1.0
BIOCARTA_IL5_PATHWAY	-0.6904965000000001	-1.4483675	0.07058824	0.4318866	1.0
BIOCARTA_SRCRPTP_PATHWAY	-0.7499789000000001	-1.5268857	0.026748972000000003	0.43213975	1.0
BIOCARTA_CTLA4_PATHWAY	-0.7335613000000001	-1.4880136999999998	0.07984032	0.43265945	1.0
REACTOME_PURINE_CATABOLISM	-0.7880151999999999	-1.497922	0.027504912000000003	0.4328325	1.0
REACTOME_UNWINDING_OF_DNA	-0.90925485	-1.4912078000000002	0.016985139	0.43291822	1.0
BIOCARTA_VEGF_PATHWAY	-0.46649244	-1.4504926999999999	0.06407767	0.43341720000000006	1.0
REACTOME_TAK1_ACTIVATES_NFKB_BY_PHOSPHORYLATION_AND_ACTIVATION_OF_IKKS_COMPLEX	-0.5195909000000001	-1.4518182	0.06382979	0.43359017	1.0
REACTOME_PYRUVATE_METABOLISM	-0.57838047	-1.4780982	0.03359684	0.43376535	1.0
REACTOME_IL_3_5_AND_GM_CSF_SIGNALING	-0.5194141999999999	-1.4575524	0.1	0.4340608	1.0
REACTOME_CHEMOKINE_RECEPTORS_BIND_CHEMOKINES	-0.75186044	-1.5343957000000001	0.01953125	0.43434688	1.0
REACTOME_PHOSPHORYLATION_OF_THE_APC_C	-0.7079536	-1.4528632	0.07707911	0.43460387	1.0
REACTOME_HEMOSTASIS	-0.352288	-1.3590995000000001	0.06418219	0.43465087	1.0
KEGG_ADHERENS_JUNCTION	-0.41439757	-1.4922653000000001	0.045908183	0.43493859999999995	1.0
KEGG_ALLOGRAFT_REJECTION	-0.7284831	-1.488747	0.07114624	0.43521333	1.0
REACTOME_IL_7_SIGNALING	-0.6910469	-1.4582996000000001	0.06451613	0.43599979999999994	1.0
KEGG_OLFACTORY_TRANSDUCTION	-0.47204250000000003	-1.4985785	0.1026694	0.43636727	1.0
REACTOME_DEGRADATION_OF_THE_EXTRACELLULAR_MATRIX	-0.60963565	-1.3571578000000002	0.11220472	0.43665308	1.0
REACTOME_NOD1_2_SIGNALING_PATHWAY	-0.5493434	-1.5275745	0.054263566	0.43674782	1.0
KEGG_INTESTINAL_IMMUNE_NETWORK_FOR_IGA_PRODUCTION	-0.6669142	-1.5314837	0.06822612	0.43685353	1.0
REACTOME_CYTOSOLIC_TRNA_AMINOACYLATION	-0.5875020000000001	-1.5020671	0.11111111	0.43691295	1.0
REACTOME_REGULATION_OF_HYPOXIA_INDUCIBLE_FACTOR_HIF_BY_OXYGEN	-0.5363405	-1.5357120000000002	0.050607285999999994	0.43704218	1.0
REACTOME_BETA_DEFENSINS	-0.8882759	-1.4801633	0.016096579	0.43713290000000005	1.0
REACTOME_N_GLYCAN_ANTENNAE_ELONGATION	-0.5406625	-1.4690568000000002	0.0831643	0.43785384	1.0
KEGG_PROTEASOME	-0.5424335	-1.3544978	0.17773438	0.43799624	1.0
REACTOME_HIV_INFECTION	-0.40050122	-1.3555258999999997	0.14629258	0.43801475	1.0
REACTOME_ANTIGEN_ACTIVATES_B_CELL_RECEPTOR_LEADING_TO_GENERATION_OF_SECOND_MESSENGERS	-0.63126665	-1.4704959	0.09619238	0.43807018	1.0
KEGG_ALPHA_LINOLENIC_ACID_METABOLISM	-0.6309783	-1.4589548	0.037924152	0.43822765	1.0
KEGG_CHEMOKINE_SIGNALING_PATHWAY	-0.5069481	-1.4781307	0.061099797000000004	0.43841752	1.0
REACTOME_SIGNAL_REGULATORY_PROTEIN_SIRP_FAMILY_INTERACTIONS	-0.63786083	-1.4613379	0.11067961	0.43907312	1.0
REACTOME_SYNTHESIS_OF_DNA	-0.56980425	-1.4671156	0.10905350000000001	0.43919238	1.0
BIOCARTA_HIF_PATHWAY	-0.59163547	-1.4625957	0.087548636	0.43961093	1.0
REACTOME_IL_RECEPTOR_SHC_SIGNALING	-0.52488184	-1.4652313	0.10642570000000001	0.44041899999999995	1.0
BIOCARTA_INTEGRIN_PATHWAY	-0.48657167	-1.4593958	0.08761905	0.44097632	1.0
REACTOME_APC_CDC20_MEDIATED_DEGRADATION_OF_NEK2A	-0.67381674	-1.3520607	0.16155419	0.44119433	1.0
BIOCARTA_BLYMPHOCYTE_PATHWAY	-0.82499295	-1.347802	0.10838446	0.44133310000000003	1.0
REACTOME_SIGNALING_BY_TGF_BETA_RECEPTOR_COMPLEX	-0.4466121	-1.470876	0.055776894	0.4416768	1.0
REACTOME_ADVANCED_GLYCOSYLATION_ENDPRODUCT_RECEPTOR_SIGNALING	-0.60134506	-1.3504847	0.14258555	0.4422267	1.0
REACTOME_DNA_REPLICATION	-0.59904784	-1.5363809	0.07867495	0.44227895	1.0
REACTOME_THE_ROLE_OF_NEF_IN_HIV1_REPLICATION_AND_DISEASE_PATHOGENESIS	-0.54083884	-1.3493603	0.20355731	0.44242328	1.0
REACTOME_TRANSCRIPTIONAL_ACTIVITY_OF_SMAD2_SMAD3_SMAD4_HETEROTRIMER	-0.45479444	-1.3483441	0.116564415	0.44245294	1.0
KEGG_DNA_REPLICATION	-0.63926	-1.4629885	0.12184874	0.44270578	1.0
REACTOME_ANTIGEN_PROCESSING_CROSS_PRESENTATION	-0.5473059	-1.4718751	0.101886794	0.44273636	1.0
REACTOME_FORMATION_OF_TUBULIN_FOLDING_INTERMEDIATES_BY_CCT_TRIC	-0.67128944	-1.5276625	0.050301813	0.4432335	1.0
REACTOME_EXTENSION_OF_TELOMERES	-0.5442788000000001	-1.3345025	0.23125	0.44464475	1.0
REACTOME_ENDOSOMAL_VACUOLAR_PATHWAY	-0.7796234999999999	-1.3452327	0.12572534	0.44493657	1.0
REACTOME_S_PHASE	-0.5123637	-1.3352331	0.17805383	0.44527894	1.0
REACTOME_INTERFERON_ALPHA_BETA_SIGNALING	-0.6032691	-1.3359883999999997	0.21230158	0.44565263	1.0
KEGG_VIRAL_MYOCARDITIS	-0.49854899999999996	-1.3377940000000001	0.1882353	0.44585859999999994	1.0
REACTOME_TIE2_SIGNALING	-0.5530536	-1.3365775	0.10141988	0.44639874	1.0
KEGG_LEUKOCYTE_TRANSENDOTHELIAL_MIGRATION	-0.43567413	-1.3433846999999999	0.12348178	0.44659775	1.0
REACTOME_REGULATION_OF_IFNA_SIGNALING	-0.46890137	-1.3382484	0.15261044	0.44708544	1.0
KEGG_GLIOMA	-0.37544563	-1.3421065	0.067729086	0.44712362	1.0
REACTOME_G_ALPHA_I_SIGNALLING_EVENTS	-0.4670054	-1.4718931	0.04117647	0.44746548	1.0
REACTOME_CDC6_ASSOCIATION_WITH_THE_ORC_ORIGIN_COMPLEX	-0.7433456999999999	-1.5368882	0.04732510400000001	0.44820738	1.0
BIOCARTA_TRKA_PATHWAY	-0.55812985	-1.340587	0.13173653	0.44846374	1.0
BIOCARTA_NKCELLS_PATHWAY	-0.54573435	-1.3394388000000002	0.17227723	0.44888538	1.0
BIOCARTA_MEF2D_PATHWAY	-0.49467748	-1.3302425	0.14800000000000002	0.44912016	1.0
BIOCARTA_THELPER_PATHWAY	-0.7930902	-1.338276	0.12955466	0.44927856	1.0
REACTOME_REGULATION_OF_THE_FANCONI_ANEMIA_PATHWAY	-0.6387066	-1.3310815	0.14256619	0.44961238	1.0
KEGG_OOCYTE_MEIOSIS	-0.40692705	-1.3240291000000002	0.10165975	0.45216432	1.0
BIOCARTA_RANMS_PATHWAY	-0.7174075	-1.324791	0.17436975	0.452705	1.0
REACTOME_POL_SWITCHING	-0.6161419	-1.3255095	0.23270439999999998	0.45332482	1.0
REACTOME_GRB2_SOS_PROVIDES_LINKAGE_TO_MAPK_SIGNALING_FOR_INTERGRINS_	-0.5960686	-1.3258531999999998	0.1754386	0.45448253	1.0
REACTOME_NA_CL_DEPENDENT_NEUROTRANSMITTER_TRANSPORTERS	-0.6557736999999999	-1.5417249	0.02970297	0.45493966	1.0
BIOCARTA_CASPASE_PATHWAY	-0.68857175	-1.5369273	0.048484847000000005	0.45584354	1.0
REACTOME_SIGNALLING_TO_RAS	-0.42700088	-1.3258555	0.15212981	0.45664674	1.0
KEGG_ANTIGEN_PROCESSING_AND_PRESENTATION	-0.49181494	-1.3194171000000001	0.20199999999999999	0.45769194	1.0
REACTOME_SMAD2_SMAD3_SMAD4_HETEROTRIMER_REGULATES_TRANSCRIPTION	-0.49525678	-1.317888	0.12749004	0.45890927	1.0
REACTOME_MRNA_DECAY_BY_3_TO_5_EXORIBONUCLEASE	-0.58349866	-1.3195894	0.18019801	0.45943555	1.0
REACTOME_TRANSPORT_OF_RIBONUCLEOPROTEINS_INTO_THE_HOST_NUCLEUS	-0.59271955	-1.5378557	0.07676349	0.46054095	1.0
REACTOME_PLATELET_SENSITIZATION_BY_LDL	-0.57656586	-1.5421869	0.044573642000000004	0.46186432	1.0
REACTOME_TRAF6_MEDIATED_IRF7_ACTIVATION	-0.46065200000000006	-1.3145576	0.17864078	0.46374688	1.0
KEGG_LONG_TERM_DEPRESSION	-0.38398635	-1.3135648000000002	0.0877193	0.46377793	1.0
KEGG_HEMATOPOIETIC_CELL_LINEAGE	-0.5787044	-1.5472883	0.054435484000000006	0.46916476	1.0
REACTOME_E2F_MEDIATED_REGULATION_OF_DNA_REPLICATION	-0.6897269	-1.5423707	0.04489796	0.46967837	1.0
BIOCARTA_ERK5_PATHWAY	-0.45565839999999996	-1.2961105	0.18181819	0.47103903	1.0
KEGG_VEGF_SIGNALING_PATHWAY	-0.41720375	-1.5438611999999998	0.028409092	0.47286990000000007	1.0
BIOCARTA_D4GDI_PATHWAY	-0.60890377	-1.2961141	0.20570265	0.47306067	1.0
KEGG_AMINOACYL_TRNA_BIOSYNTHESIS	-0.4558813	-1.304034	0.22868218	0.47416598	1.0
BIOCARTA_CCR3_PATHWAY	-0.38976765	-1.3049723999999998	0.15338646	0.4742191	1.0
REACTOME_NITRIC_OXIDE_STIMULATES_GUANYLATE_CYCLASE	-0.44313374	-1.2963726999999998	0.17068273	0.47440434	1.0
BIOCARTA_MONOCYTE_PATHWAY	-0.7311294	-1.3025322	0.18786693	0.47551137	1.0
KEGG_NON_SMALL_CELL_LUNG_CANCER	-0.36105135	-1.3005253	0.089613035	0.47577715	1.0
BIOCARTA_SODD_PATHWAY	-0.64274895	-1.2965593	0.18476191	0.47597504	1.0
REACTOME_CLASS_A1_RHODOPSIN_LIKE_RECEPTORS	-0.38768795	-1.3051131999999999	0.13653846	0.47608748	1.0
REACTOME_PD1_SIGNALING	-0.7321269	-1.2971978000000002	0.23	0.47682109999999994	1.0
REACTOME_CDK_MEDIATED_PHOSPHORYLATION_AND_REMOVAL_OF_CDC6	-0.51493317	-1.3009578000000002	0.21218075	0.47690675	1.0
REACTOME_NOTCH1_INTRACELLULAR_DOMAIN_REGULATES_TRANSCRIPTION	-0.41221595	-1.2981280000000002	0.13293651	0.47693548	1.0
REACTOME_TRANSPORT_OF_MATURE_TRANSCRIPT_TO_CYTOPLASM	-0.44591102	-1.306127	0.20042194	0.47815597	1.0
REACTOME_REGULATION_OF_IFNG_SIGNALING	-0.5563748000000001	-1.305146	0.21399178	0.47815892	1.0
REACTOME_INTERACTIONS_OF_VPR_WITH_HOST_CELLULAR_PROTEINS	-0.58157057	-1.5474156000000001	0.056399133	0.47821298	1.0
REACTOME_GLYCOLYSIS	-0.49388817	-1.2984083999999998	0.19411765	0.4784344	1.0
REACTOME_ADHERENS_JUNCTIONS_INTERACTIONS	-0.45387268	-1.2871786	0.14143427	0.47844369999999997	1.0
BIOCARTA_SKP2E2F_PATHWAY	-0.5695264	-1.2725941	0.19144602	0.47858223	1.0
REACTOME_PURINE_METABOLISM	-0.5012991	-1.2916718999999999	0.18309858	0.4787621	1.0
REACTOME_SIGNALING_BY_CONSTITUTIVELY_ACTIVE_EGFR	-0.47625068	-1.2886196	0.16149068	0.47923258	1.0
BIOCARTA_TCRA_PATHWAY	-0.8073093000000001	-1.2875578	0.2244489	0.47959816	1.0
BIOCARTA_DNAFRAGMENT_PATHWAY	-0.68612415	-1.2893217	0.17755102	0.479725	1.0
REACTOME_AMINO_ACID_SYNTHESIS_AND_INTERCONVERSION_TRANSAMINATION	-0.5415587	-1.2728515	0.17115384	0.47995237	1.0
KEGG_TYPE_I_DIABETES_MELLITUS	-0.5780441	-1.2896874	0.23471399999999998	0.48093534	1.0
REACTOME_LAGGING_STRAND_SYNTHESIS	-0.56582165	-1.2850366000000002	0.2634855	0.48114103	1.0
REACTOME_INNATE_IMMUNE_SYSTEM	-0.3844287	-1.2738903	0.16078432	0.4815718	1.0
REACTOME_REGULATION_OF_APOPTOSIS	-0.44932494	-1.2729256000000002	0.23506744	0.48168537	1.0
BIOCARTA_SET_PATHWAY	-0.6682328000000001	-1.26939	0.19587629	0.48319995	1.0
REACTOME_VIF_MEDIATED_DEGRADATION_OF_APOBEC3G	-0.48287222	-1.2739544	0.24423076	0.48333287	1.0
REACTOME_SHC1_EVENTS_IN_EGFR_SIGNALING	-0.50388426	-1.2682194	0.17623763	0.48376918	1.0
REACTOME_SLBP_DEPENDENT_PROCESSING_OF_REPLICATION_DEPENDENT_HISTONE_PRE_MRNAS	-0.6026901	-1.2742639999999998	0.24329896	0.48449093	1.0
REACTOME_AUTODEGRADATION_OF_THE_E3_UBIQUITIN_LIGASE_COP1	-0.48672786	-1.26695	0.2254902	0.48457476	1.0
REACTOME_RIG_I_MDA5_MEDIATED_INDUCTION_OF_IFN_ALPHA_BETA_PATHWAYS	-0.38534272	-1.2748638	0.21600000000000003	0.48517558	1.0
KEGG_SELENOAMINO_ACID_METABOLISM	-0.4511495	-1.2656995	0.17681728	0.48523900000000003	1.0
KEGG_FC_GAMMA_R_MEDIATED_PHAGOCYTOSIS	-0.49287390000000003	-1.5477594	0.034274194	0.48659095	1.0
REACTOME_SCFSKP2_MEDIATED_DEGRADATION_OF_P27_P21	-0.49168238	-1.2749012	0.23	0.48703223	1.0
KEGG_PATHWAYS_IN_CANCER	-0.31755748	-1.2805486000000001	0.07312253	0.48857817	1.0
REACTOME_CLASS_C_3_METABOTROPIC_GLUTAMATE_PHEROMONE_RECEPTORS	-0.5343949	-1.2749466	0.2219917	0.48887068	1.0
REACTOME_SCF_BETA_TRCP_MEDIATED_DEGRADATION_OF_EMI1	-0.49978134	-1.2753371999999998	0.22440945	0.4899593	1.0
KEGG_LYSINE_DEGRADATION	-0.39267929999999995	-1.2778132	0.13601533	0.49046227	1.0
BIOCARTA_TCAPOPTOSIS_PATHWAY	-0.7233081	-1.2785983	0.24212599	0.4906887	1.0
BIOCARTA_CXCR4_PATHWAY	-0.4882065	-1.2755401000000002	0.21975806	0.4915052	1.0
REACTOME_GPCR_LIGAND_BINDING	-0.35282615	-1.2761784999999999	0.13926499	0.4919995	1.0
REACTOME_JNK_C_JUN_KINASES_PHOSPHORYLATION_AND_ACTIVATION_MEDIATED_BY_ACTIVATED_HUMAN_TAK1	-0.41033149999999996	-1.2614652	0.19096509	0.49232584	1.0
REACTOME_P53_DEPENDENT_G1_DNA_DAMAGE_RESPONSE	-0.4697112	-1.2582566000000002	0.23446894	0.49536450000000004	1.0
REACTOME_CELL_CYCLE_CHECKPOINTS	-0.62971544	-1.5480812	0.049484535999999996	0.49559899999999996	1.0
KEGG_EPITHELIAL_CELL_SIGNALING_IN_HELICOBACTER_PYLORI_INFECTION	-0.3618953	-1.2582816000000001	0.13883299999999998	0.49718606	1.0
REACTOME_IL1_SIGNALING	-0.3726178	-1.2557633	0.16415094	0.49894127	1.0
REACTOME_CD28_DEPENDENT_VAV1_PATHWAY	-0.59954035	-1.2532681	0.23076923	0.500717	1.0
REACTOME_PLATELET_HOMEOSTASIS	-0.31674808	-1.2537421	0.19001919	0.501402	1.0
REACTOME_SIGNALING_BY_NOTCH1	-0.39476642	-1.2511216	0.15463917	0.5015978	1.0
BIOCARTA_RAC1_PATHWAY	-0.45697948	-1.2514621000000001	0.16563147	0.5027891	1.0
REACTOME_TRAF6_MEDIATED_NFKB_ACTIVATION	-0.48200423	-1.2472103	0.21988527	0.50413376	1.0
BIOCARTA_CELL2CELL_PATHWAY	-0.42021194	-1.2397655	0.24118738	0.5046788	1.0
REACTOME_INTEGRIN_ALPHAIIB_BETA3_SIGNALING	-0.47052196	-1.2485411	0.20773931	0.5049488	1.0
KEGG_LONG_TERM_POTENTIATION	-0.35242793	-1.2449602	0.15853658	0.5050097	1.0
REACTOME_AMINO_ACID_AND_OLIGOPEPTIDE_SLC_TRANSPORTERS	-0.40065703	-1.2412829	0.15725806	0.50503945	1.0
BIOCARTA_PTDINS_PATHWAY	-0.5598403000000001	-1.5482599	0.04109589	0.50540006	1.0
KEGG_RENAL_CELL_CARCINOMA	-0.3130103	-1.2474829	0.12426036	0.5054113	1.0
REACTOME_DOWNSTREAM_TCR_SIGNALING	-0.52585864	-1.2453226	0.23819302	0.50613284	1.0
REACTOME_PHOSPHORYLATION_OF_CD3_AND_TCR_ZETA_CHAINS	-0.7653446999999999	-1.2414786	0.26771653	0.50647205	1.0
BIOCARTA_P38MAPK_PATHWAY	-0.35283062	-1.2397711	0.15587045	0.50649416	1.0
REACTOME_OXYGEN_DEPENDENT_PROLINE_HYDROXYLATION_OF_HYPOXIA_INDUCIBLE_FACTOR_ALPHA	-0.4770085	-1.2433450000000001	0.23326571	0.5065292	1.0
KEGG_PENTOSE_PHOSPHATE_PATHWAY	-0.47990602	-1.2417626	0.19685039	0.5077965999999999	1.0
REACTOME_BINDING_AND_ENTRY_OF_HIV_VIRION	-0.75050765	-1.2354578999999999	0.26	0.5079653000000001	1.0
KEGG_CYTOSOLIC_DNA_SENSING_PATHWAY	-0.4499003	-1.2371413999999998	0.22772278	0.50809306	1.0
REACTOME_SIGNALING_BY_GPCR	-0.30794305	-1.2356637	0.15944882	0.5093502999999999	1.0
REACTOME_METABOLISM_OF_CARBOHYDRATES	-0.32112738	-1.2331216	0.1194605	0.5110423	1.0
REACTOME_APOPTOSIS	-0.3501538	-1.2131836	0.19642857	0.51252687	1.0
REACTOME_ACYL_CHAIN_REMODELLING_OF_PG	-0.5416419	-1.2313591	0.21984436	0.5130699000000001	1.0
REACTOME_MHC_CLASS_II_ANTIGEN_PRESENTATION	-0.40519044	-1.2095091	0.22072937	0.5131448000000001	1.0
KEGG_TRYPTOPHAN_METABOLISM	-0.46904895	-1.2102443	0.18609023	0.5132647	1.0
REACTOME_PROTEIN_FOLDING	-0.40561947	-1.2291715	0.21696253	0.51402533	1.0
REACTOME_FANCONI_ANEMIA_PATHWAY	-0.49185634	-1.217571	0.2701031	0.51409745	1.0
REACTOME_CYCLIN_A_B1_ASSOCIATED_EVENTS_DURING_G2_M_TRANSITION	-0.60588855	-1.2131839	0.29958677	0.51421285	1.0
BIOCARTA_ETS_PATHWAY	-0.46593833	-1.2105613000000002	0.26377952	0.51426786	1.0
REACTOME_MITOTIC_G2_G2_M_PHASES	-0.38688385	-1.2298901000000002	0.25265393	0.5144339	1.0
KEGG_B_CELL_RECEPTOR_SIGNALING_PATHWAY	-0.41844374	-1.2280742	0.262	0.5145885	1.0
KEGG_NATURAL_KILLER_CELL_MEDIATED_CYTOTOXICITY	-0.5046055	-1.5486959999999999	0.08219178	0.514641	1.0
KEGG_ASTHMA	-0.57250005	-1.2135657	0.28654972	0.51517445	1.0
REACTOME_TOLL_RECEPTOR_CASCADES	-0.36124933	-1.2108947	0.19274808	0.5152437	1.0
REACTOME_HYALURONAN_UPTAKE_AND_DEGRADATION	-0.48701075	-1.223938	0.22284645	0.5154629	1.0
REACTOME_REGULATION_OF_ORNITHINE_DECARBOXYLASE_ODC	-0.47753292	-1.217706	0.28290766	0.51560533	1.0
KEGG_REGULATION_OF_ACTIN_CYTOSKELETON	-0.29226395	-1.2141431999999999	0.17764471	0.5157668	1.0
REACTOME_SIGNAL_AMPLIFICATION	-0.39777629999999997	-1.2004061000000001	0.22093023	0.51585186	1.0
BIOCARTA_IL22BP_PATHWAY	-0.5180675	-1.2191821000000003	0.28688523	0.5159720999999999	1.0
KEGG_VASCULAR_SMOOTH_MUSCLE_CONTRACTION	-0.34273663	-1.2012143	0.19178082	0.51599	1.0
BIOCARTA_PARKIN_PATHWAY	-0.47517666	-1.2245309	0.21359223	0.5161502	1.0
REACTOME_P38MAPK_EVENTS	-0.46987274	-1.2146436999999999	0.25050100000000003	0.5164964	1.0
REACTOME_AUTODEGRADATION_OF_CDH1_BY_CDH1_APC_C	-0.4517517	-1.2018001	0.29044834	0.51655096	1.0
REACTOME_TRANSLOCATION_OF_ZAP_70_TO_IMMUNOLOGICAL_SYNAPSE	-0.76528317	-1.2251396	0.27309236	0.5167254	1.0
REACTOME_COMMON_PATHWAY	-0.60083836	-1.2180289	0.2519084	0.5167517	1.0
BIOCARTA_EPHA4_PATHWAY	-0.7582415	-1.551142	0.019723866	0.51681906	1.0
BIOCARTA_CDC42RAC_PATHWAY	-0.5151720999999999	-1.2032114	0.27309236	0.51708925	1.0
REACTOME_REGULATION_OF_GENE_EXPRESSION_IN_BETA_CELLS	-0.44322026	-1.2193031	0.23647295	0.51743734	1.0
REACTOME_P75NTR_RECRUITS_SIGNALLING_COMPLEXES	-0.42691904	-1.206395	0.24031007	0.5174447	1.0
REACTOME_NETRIN1_SIGNALING	-0.34460405	-1.1987254999999999	0.1875	0.51747864	1.0
BIOCARTA_HIVNEF_PATHWAY	-0.3687571	-1.1978718000000002	0.21541502	0.51750743	1.0
BIOCARTA_IL10_PATHWAY	-0.50931734	-1.2149755	0.26546907	0.5175445	1.0
REACTOME_RECEPTOR_LIGAND_BINDING_INITIATES_THE_SECOND_PROTEOLYTIC_CLEAVAGE_OF_NOTCH_RECEPTOR	-0.52776337	-1.2255441	0.28131416	0.5177411	1.0
REACTOME_PYRUVATE_METABOLISM_AND_CITRIC_ACID_TCA_CYCLE	-0.4069636	-1.20191	0.25240847	0.5179733	1.0
REACTOME_EXTRINSIC_PATHWAY_FOR_APOPTOSIS	-0.5189255	-1.1924256000000002	0.28599605	0.51856863	1.0
KEGG_GNRH_SIGNALING_PATHWAY	-0.31710577	-1.1956829	0.13829787	0.5186662999999999	1.0
REACTOME_ANTIGEN_PRESENTATION_FOLDING_ASSEMBLY_AND_PEPTIDE_LOADING_OF_CLASS_I_MHC	-0.54206395	-1.2032669	0.29882812	0.51866907	1.0
REACTOME_SIGNALLING_TO_P38_VIA_RIT_AND_RIN	-0.5046991	-1.2194357	0.24144869	0.51895285	1.0
REACTOME_DESTABILIZATION_OF_MRNA_BY_AUF1_HNRNP_D0	-0.45146844	-1.1962798000000001	0.2802303	0.51905084	1.0
REACTOME_TIGHT_JUNCTION_INTERACTIONS	-0.466996	-1.2039205	0.25396827	0.5191498	1.0
BIOCARTA_NFKB_PATHWAY	-0.39647892	-1.1936308999999998	0.23518164	0.519349	1.0
REACTOME_CGMP_EFFECTS	-0.41848126	-1.1925933000000002	0.28076923	0.5198748	1.0
BIOCARTA_ARF_PATHWAY	-0.4778295	-1.1941073	0.23943663	0.5198885	1.0
KEGG_GAP_JUNCTION	-0.3476348	-1.2198652	0.17800000000000002	0.5199256	1.0
REACTOME_SIGNALING_BY_NOTCH	-0.3508545	-1.2040336	0.19114688	0.5205952	1.0
BIOCARTA_LAIR_PATHWAY	-0.6106948	-1.2203901000000001	0.2729045	0.5206738000000001	1.0
REACTOME_HIV_LIFE_CYCLE	-0.3519094	-1.1905516	0.27329192	0.52068454	1.0
KEGG_NEUROTROPHIN_SIGNALING_PATHWAY	-0.29008734	-1.1886172	0.17821783	0.52114505	1.0
BIOCARTA_DC_PATHWAY	-0.58763206	-1.5525702	0.058490567	0.521846	1.0
KEGG_APOPTOSIS	-0.33925720000000004	-1.188628	0.22264151	0.52271134	1.0
REACTOME_FACTORS_INVOLVED_IN_MEGAKARYOCYTE_DEVELOPMENT_AND_PLATELET_PRODUCTION	-0.3198149	-1.1837981000000002	0.19057377	0.5236375	1.0
REACTOME_P75NTR_SIGNALS_VIA_NFKB	-0.39270770000000005	-1.1841198999999998	0.25992063	0.5246195	1.0
KEGG_WNT_SIGNALING_PATHWAY	-0.33909792	-1.1845336000000002	0.1949807	0.5254715999999999	1.0
KEGG_GLYCOSPHINGOLIPID_BIOSYNTHESIS_GLOBO_SERIES	-0.46714014	-1.1849192	0.23260437	0.52622414	1.0
BIOCARTA_STATHMIN_PATHWAY	-0.51390004	-1.1785499	0.272	0.52747506	1.0
REACTOME_P130CAS_LINKAGE_TO_MAPK_SIGNALING_FOR_INTEGRINS	-0.5462020000000001	-1.1774426000000002	0.3088803	0.5278654	1.0
KEGG_HOMOLOGOUS_RECOMBINATION	-0.42233327	-1.1806333999999998	0.2765531	0.5281561	1.0
REACTOME_ACTIVATION_OF_GENES_BY_ATF4	-0.43803242	-1.1796443	0.26195028	0.5285543	1.0
REACTOME_PROLONGED_ERK_ACTIVATION_EVENTS	-0.39988396	-1.178677	0.26060605	0.52875906	1.0
REACTOME_SIGNALING_BY_SCF_KIT	-0.46359226	-1.5560946000000002	0.02811245	0.5314749	0.9990000000000001
KEGG_TOLL_LIKE_RECEPTOR_SIGNALING_PATHWAY	-0.50620127	-1.5531118	0.025390625	0.5315986999999999	1.0
REACTOME_SIGNALING_BY_HIPPO	-0.46772529999999995	-1.1726771999999999	0.28039217	0.53396577	1.0
REACTOME_TRANSPORT_OF_INORGANIC_CATIONS_ANIONS_AND_AMINO_ACIDS_OLIGOPEPTIDES	-0.33637083	-1.1729907	0.20588236	0.5349248000000001	1.0
REACTOME_SHC_MEDIATED_SIGNALLING	-0.44013795	-1.1679507	0.27128714	0.53514785	1.0
REACTOME_TRAF6_MEDIATED_INDUCTION_OF_TAK1_COMPLEX	-0.522347	-1.1670408	0.31835938	0.53532535	1.0
BIOCARTA_ECM_PATHWAY	-0.42094743	-1.1658777	0.30214426	0.5358151	1.0
REACTOME_REGULATION_OF_INSULIN_SECRETION_BY_ACETYLCHOLINE	-0.47466305	-1.1681161	0.28625953	0.5363994000000001	1.0
REACTOME_SEMA3A_PLEXIN_REPULSION_SIGNALING_BY_INHIBITING_INTEGRIN_ADHESION	-0.47403237	-1.1692773	0.2821497	0.53731126	1.0
BIOCARTA_SARS_PATHWAY	-0.5468109	-1.1684188999999998	0.29896906	0.5374143	1.0
REACTOME_AXON_GUIDANCE	-0.30412686	-1.1640428	0.23991935	0.5376615	1.0
REACTOME_PROCESSIVE_SYNTHESIS_ON_THE_LAGGING_STRAND	-0.49668149999999994	-1.1565436000000002	0.33744857	0.5378776999999999	1.0
KEGG_GLYCOLYSIS_GLUCONEOGENESIS	-0.36929038	-1.1697433000000002	0.21442495	0.5380041	1.0
BIOCARTA_GRANULOCYTES_PATHWAY	-0.5782684	-1.1612467	0.33399999999999996	0.53823924	1.0
REACTOME_ACTIVATION_OF_NF_KAPPAB_IN_B_CELLS	-0.41058162	-1.1619204	0.3106796	0.5385573	1.0
REACTOME_NEGATIVE_REGULATORS_OF_RIG_I_MDA5_SIGNALING	-0.48828006	-1.1569009	0.34810126	0.5387295	1.0
KEGG_TIGHT_JUNCTION	-0.29554823	-1.1626315	0.20038536	0.5387561	1.0
REACTOME_CELL_JUNCTION_ORGANIZATION	-0.37888676	-1.1593127	0.23625255	0.5387755999999999	1.0
REACTOME_REPAIR_SYNTHESIS_FOR_GAP_FILLING_BY_DNA_POL_IN_TC_NER	-0.53144103	-1.1597517	0.33611690000000005	0.53947574	1.0
REACTOME_SLC_MEDIATED_TRANSMEMBRANE_TRANSPORT	-0.28294647	-1.1571394	0.20079523	0.5398419	1.0
REACTOME_ARMS_MEDIATED_ACTIVATION	-0.42008778	-1.1578093999999999	0.27732792	0.54019874	1.0
REACTOME_ACTIVATION_OF_RAC	-0.63442206	-1.5599748	0.023904382999999998	0.54107857	0.997
REACTOME_TCR_SIGNALING	-0.48376945	-1.1487716000000001	0.34016395	0.5415266	1.0
REACTOME_RIP_MEDIATED_NFKB_ACTIVATION_VIA_DAI	-0.43228784	-1.1493778000000001	0.27663553	0.54205203	1.0
KEGG_JAK_STAT_SIGNALING_PATHWAY	-0.30719247	-1.1508143999999998	0.2834008	0.5425174	1.0
REACTOME_GPCR_DOWNSTREAM_SIGNALING	-0.29472109999999996	-1.1498798000000001	0.27362204	0.54272413	1.0
REACTOME_SYNTHESIS_OF_PA	-0.41448019999999997	-1.1531284	0.292	0.5427289000000001	1.0
REACTOME_ASSEMBLY_OF_THE_PRE_REPLICATIVE_COMPLEX	-0.6096832	-1.5563151000000002	0.062248997	0.5433269000000001	0.998
REACTOME_CELL_CELL_JUNCTION_ORGANIZATION	-0.37613267	-1.1519669	0.25148514	0.5434035	1.0
REACTOME_TGF_BETA_RECEPTOR_SIGNALING_IN_EMT_EPITHELIAL_TO_MESENCHYMAL_TRANSITION	-0.41593003	-1.15098	0.29938899999999996	0.54369766	1.0
BIOCARTA_MAL_PATHWAY	-0.38615704	-1.1452448	0.31650487	0.54663235	1.0
REACTOME_PURINE_SALVAGE	-0.5214404	-1.1441636	0.29458920000000005	0.5470944999999999	1.0
REACTOME_CHYLOMICRON_MEDIATED_LIPID_TRANSPORT	-0.48013744	-1.1430243999999998	0.29044834	0.5477994	1.0
BIOCARTA_P27_PATHWAY	-0.49941593	-1.1412604	0.32421052	0.54816717	1.0
REACTOME_SHC_RELATED_EVENTS	-0.40518737	-1.1417452	0.3117409	0.5487714	1.0
REACTOME_RESPONSE_TO_ELEVATED_PLATELET_CYTOSOLIC_CA2_	-0.40769222	-1.13964	0.31262136	0.54950106	1.0
BIOCARTA_IL2_PATHWAY	-0.42804068	-1.1364123	0.33333334	0.5541269	1.0
BIOCARTA_G1_PATHWAY	-0.4050011	-1.1339282	0.29399586	0.5543939	1.0
BIOCARTA_PS1_PATHWAY	-0.55627495	-1.5600923	0.034548946000000004	0.5544455	0.997
KEGG_SMALL_CELL_LUNG_CANCER	-0.32366017	-1.1354223	0.21951220000000002	0.5544465000000001	1.0
REACTOME_CHONDROITIN_SULFATE_BIOSYNTHESIS	-0.5381946	-1.1346045	0.33522728	0.55452293	1.0
KEGG_ENDOMETRIAL_CANCER	-0.33424026	-1.1330541	0.25203252	0.5546135	1.0
REACTOME_CYCLIN_E_ASSOCIATED_EVENTS_DURING_G1_S_TRANSITION_	-0.42309220000000003	-1.1311209999999998	0.31983805	0.5566281	1.0
KEGG_PURINE_METABOLISM	-0.28145334	-1.1293129	0.27366254	0.5584723	1.0
REACTOME_PERK_REGULATED_GENE_EXPRESSION	-0.40598878	-1.1257728	0.31332082	0.5590635	1.0
REACTOME_TRNA_AMINOACYLATION	-0.38462943	-1.1178856000000001	0.35559922	0.5591071999999999	1.0
BIOCARTA_TNFR1_PATHWAY	-0.37004054	-1.1249149	0.26232740000000004	0.55920136	1.0
REACTOME_REGULATION_OF_MRNA_STABILITY_BY_PROTEINS_THAT_BIND_AU_RICH_ELEMENTS	-0.35673374	-1.1183966	0.32625479999999996	0.5594424	1.0
REACTOME_PLATELET_ACTIVATION_SIGNALING_AND_AGGREGATION	-0.3286962	-1.1190635	0.30181086	0.55959135	1.0
KEGG_MISMATCH_REPAIR	-0.46881023	-1.1197587	0.37029287	0.55989146	1.0
REACTOME_CELL_EXTRACELLULAR_MATRIX_INTERACTIONS	-0.49692228	-1.1220282	0.35812134	0.5600446	1.0
KEGG_BASAL_CELL_CARCINOMA	-0.37768343	-1.1257836	0.30136988	0.56051797	1.0
REACTOME_YAP1_AND_WWTR1_TAZ_STIMULATED_GENE_EXPRESSION	-0.40921268	-1.1273395	0.2835249	0.5606696	1.0
BIOCARTA_PYK2_PATHWAY	-0.35390190000000005	-1.1199808999999998	0.32172132	0.56096095	1.0
BIOCARTA_DEATH_PATHWAY	-0.39578968	-1.122321	0.32553607	0.5610061	1.0
BIOCARTA_PTC1_PATHWAY	-0.5259086	-1.120593	0.39534885	0.56125736	1.0
KEGG_GLYCOSAMINOGLYCAN_BIOSYNTHESIS_CHONDROITIN_SULFATE	-0.47438064	-1.1260713	0.33271027	0.5614639	1.0
KEGG_ETHER_LIPID_METABOLISM	-0.43939587	-1.1226763000000002	0.30891088	0.5618939000000001	1.0
KEGG_ACUTE_MYELOID_LEUKEMIA	-0.34546936	-1.1145254	0.27647059999999996	0.5624041	1.0
REACTOME_REGULATION_OF_PYRUVATE_DEHYDROGENASE_PDH_COMPLEX	-0.44664916	-1.1149693	0.31416836	0.56303155	1.0
REACTOME_SYNTHESIS_AND_INTERCONVERSION_OF_NUCLEOTIDE_DI_AND_TRIPHOSPHATES	-0.48454297	-1.1120255	0.34189722	0.5655941	1.0
BIOCARTA_BIOPEPTIDES_PATHWAY	-0.34727138	-1.1103489	0.3180873	0.56720066	1.0
KEGG_LINOLEIC_ACID_METABOLISM	-0.59679955	-1.5602298000000001	0.028169014	0.56856745	0.997
KEGG_PHOSPHATIDYLINOSITOL_SIGNALING_SYSTEM	-0.29700765	-1.1060885	0.27021697	0.5737057	1.0
REACTOME_REMOVAL_OF_THE_FLAP_INTERMEDIATE_FROM_THE_C_STRAND	-0.51351875	-1.1029711000000002	0.37627813	0.577915	1.0
KEGG_CELL_CYCLE	-0.5961394	-1.5606596000000001	0.03131524	0.5818643	0.997
KEGG_RIG_I_LIKE_RECEPTOR_SIGNALING_PATHWAY	-0.31521013	-1.0985453	0.36363637	0.5847438	1.0
BIOCARTA_TCR_PATHWAY	-0.4108016	-1.0960741000000003	0.38945234	0.5875974	1.0
BIOCARTA_CLASSIC_PATHWAY	-0.613263	-1.0946592	0.40384614	0.58866525	1.0
REACTOME_O_LINKED_GLYCOSYLATION_OF_MUCINS	-0.39020136	-1.0925319	0.2977099	0.591047	1.0
REACTOME_ACTIVATED_TLR4_SIGNALLING	-0.31820983	-1.0887277	0.32777777	0.59645903	1.0
BIOCARTA_ARENRF2_PATHWAY	-0.47791037	-1.0871203	0.35700196	0.59648806	1.0
KEGG_STEROID_BIOSYNTHESIS	-0.5153061999999999	-1.0861919	0.3503937	0.59670836	1.0
BIOCARTA_FCER1_PATHWAY	-0.4132813	-1.0837905	0.34567901	0.59676784	1.0
REACTOME_LATE_PHASE_OF_HIV_LIFE_CYCLE	-0.32460898	-1.0877001	0.37755102	0.5968675999999999	1.0
REACTOME_NEF_MEDIATED_DOWNREGULATION_OF_MHC_CLASS_I_COMPLEX_CELL_SURFACE_EXPRESSION	-0.43873218	-1.0853146	0.36570248	0.5968690999999999	1.0
REACTOME_CD28_CO_STIMULATION	-0.5633293	-1.5606844	0.03807615	0.59786063	0.997
BIOCARTA_MYOSIN_PATHWAY	-0.33949196	-1.0839683	0.36417323	0.5979237	1.0
REACTOME_LOSS_OF_NLP_FROM_MITOTIC_CENTROSOMES	-0.3289571	-1.080091	0.35654008	0.60024655	1.0
REACTOME_DOWNSTREAM_SIGNALING_EVENTS_OF_B_CELL_RECEPTOR_BCR	-0.33079198	-1.0801296	0.36594912	0.6016562	1.0
REACTOME_TERMINATION_OF_O_GLYCAN_BIOSYNTHESIS	-0.49299198	-1.0783865	0.35700196	0.601891	1.0
REACTOME_LATENT_INFECTION_OF_HOMO_SAPIENS_WITH_MYCOBACTERIUM_TUBERCULOSIS	-0.41289702	-1.0762871999999999	0.35795453	0.60286117	1.0
REACTOME_THE_NLRP3_INFLAMMASOME	-0.51042056	-1.0767775	0.36272544	0.6033853	1.0
KEGG_FRUCTOSE_AND_MANNOSE_METABOLISM	-0.37069145	-1.0750711000000002	0.3501006	0.6037328000000001	1.0
REACTOME_TRAF3_DEPENDENT_IRF_ACTIVATION_PATHWAY	-0.48252818	-1.0729996000000002	0.40236688	0.60609794	1.0
REACTOME_PLC_BETA_MEDIATED_EVENTS	-0.34347009999999994	-1.0721701000000001	0.3514563	0.60623544	1.0
BIOCARTA_GLYCOLYSIS_PATHWAY	-0.7410866	-1.5621568000000001	0.04263566	0.60744506	0.997
BIOCARTA_BCR_PATHWAY	-0.383693	-1.0661786	0.41260162	0.6144658000000001	1.0
BIOCARTA_RNA_PATHWAY	-0.42945686	-1.0661854	0.38943249999999996	0.61592793	1.0
KEGG_SULFUR_METABOLISM	-0.46488506	-1.0633261999999999	0.38505748	0.61815864	1.0
REACTOME_DEVELOPMENTAL_BIOLOGY	-0.2571822	-1.0621468	0.30566037	0.6188023	1.0
REACTOME_INFLAMMASOMES	-0.45524960000000003	-1.0588268	0.37869823	0.6190966999999999	1.0
REACTOME_RECRUITMENT_OF_MITOTIC_CENTROSOME_PROTEINS_AND_COMPLEXES	-0.32568952	-1.0594982	0.3873684	0.6193465	1.0
REACTOME_RESOLUTION_OF_AP_SITES_VIA_THE_SINGLE_NUCLEOTIDE_REPLACEMENT_PATHWAY	0.58396	1.3838967	0.097609565	0.6198958000000001	1.0
REACTOME_METABOLISM_OF_RNA	-0.27174002	-1.0575056999999999	0.40162270000000005	0.6201045999999999	1.0
KEGG_ASCORBATE_AND_ALDARATE_METABOLISM	0.76432425	1.38113	0.10789981	0.6202857	1.0
REACTOME_EXTRACELLULAR_MATRIX_ORGANIZATION	-0.45635694	-1.0595659	0.37790698	0.620695	1.0
REACTOME_TRAF6_MEDIATED_IRF7_ACTIVATION_IN_TLR7_8_OR_9_SIGNALING	-0.48935680000000004	-1.0603462	0.41210938	0.6206994	1.0
KEGG_PATHOGENIC_ESCHERICHIA_COLI_INFECTION	-0.5331473000000001	-1.563036	0.025291828	0.6214	0.997
REACTOME_MITOCHONDRIAL_FATTY_ACID_BETA_OXIDATION	0.61567736	1.3942792	0.125	0.6234997	1.0
KEGG_GLUTATHIONE_METABOLISM	-0.39738727	-1.0485431	0.37984496	0.6262585	1.0
REACTOME_RAF_MAP_KINASE_CASCADE	-0.46484104	-1.0460048000000002	0.4308617	0.6264887	1.0
REACTOME_UNFOLDED_PROTEIN_RESPONSE	-0.30964595	-1.0374837	0.40996170000000004	0.6265656999999999	1.0
REACTOME_TETRAHYDROBIOPTERIN_BH4_SYNTHESIS_RECYCLING_SALVAGE_AND_REGULATION	-0.44988114	-1.0491558	0.40518963	0.62658453	1.0
REACTOME_NEF_MEDIATES_DOWN_MODULATION_OF_CELL_SURFACE_RECEPTORS_BY_RECRUITING_THEM_TO_CLATHRIN_ADAPTERS	-0.38651645	-1.047519	0.4121212	0.62668025	1.0
KEGG_PANCREATIC_CANCER	-0.2836989	-1.0529233999999998	0.36713997	0.62694883	1.0
REACTOME_NEURONAL_SYSTEM	0.3412914	1.3845392	0.08712871400000001	0.62716985	1.0
REACTOME_PPARA_ACTIVATES_GENE_EXPRESSION	-0.32067156	-1.0503591	0.39257812	0.6272595000000001	1.0
REACTOME_APOPTOTIC_CLEAVAGE_OF_CELL_ADHESION_PROTEINS	-0.50970876	-1.0519714	0.3987976	0.62735575	1.0
REACTOME_CLASS_I_MHC_MEDIATED_ANTIGEN_PROCESSING_PRESENTATION	-0.30657333	-1.0463107	0.38653848	0.6274228000000001	1.0
REACTOME_GENERATION_OF_SECOND_MESSENGER_MOLECULES	-0.52339023	-1.051108	0.43346775	0.62742347	1.0
REACTOME_ADP_SIGNALLING_THROUGH_P2RY1	-0.35183337	-1.049449	0.39726028	0.6275145999999999	1.0
REACTOME_MYD88_MAL_CASCADE_INITIATED_ON_PLASMA_MEMBRANE	-0.30481377	-1.0376769000000001	0.38533834	0.6276611999999999	1.0
REACTOME_MEMBRANE_TRAFFICKING	0.38132134	1.3959216	0.1003937	0.6277881	1.0
BIOCARTA_RAB_PATHWAY	-0.4591919	-1.0382828000000002	0.42460316	0.6279044	1.0
BIOCARTA_DREAM_PATHWAY	0.6432959	1.3899785	0.108829565	0.62828285	1.0
REACTOME_SEMAPHORIN_INTERACTIONS	-0.32549295	-1.0339452	0.42166343	0.6284959	1.0
KEGG_PYRIMIDINE_METABOLISM	-0.3288738	-1.0386481	0.39102563	0.6286255999999999	1.0
BIOCARTA_CDMAC_PATHWAY	-0.44326955	-1.0433024	0.392	0.6286318000000001	1.0
REACTOME_DCC_MEDIATED_ATTRACTIVE_SIGNALING	-0.37188423	-1.0344744000000001	0.4206501	0.6289485	1.0
BIOCARTA_EPONFKB_PATHWAY	-0.3973705	-1.0438441999999999	0.40433925	0.62904173	1.0
REACTOME_GABA_RECEPTOR_ACTIVATION	-0.3050084	-1.039858	0.39019608	0.62934	1.0
REACTOME_NUCLEOTIDE_LIKE_PURINERGIC_RECEPTORS	-0.44981238	-1.0390447	0.41600000000000004	0.6293586999999999	1.0
KEGG_ERBB_SIGNALING_PATHWAY	-0.27698284	-1.0347332	0.39413000000000004	0.6299584	1.0
BIOCARTA_AKAP95_PATHWAY	-0.50855035	-1.0401928	0.4249012	0.630092	1.0
BIOCARTA_CHEMICAL_PATHWAY	-0.3707922	-1.0404624	0.41414142	0.63102543	1.0
REACTOME_IRAK1_RECRUITS_IKK_COMPLEX	-0.47737148	-1.0411458	0.42774567	0.631138	1.0
REACTOME_ACYL_CHAIN_REMODELLING_OF_PS	-0.469079	-1.0308791	0.4333996	0.6313376	1.0
REACTOME_ACTIVATION_OF_IRF3_IRF7_MEDIATED_BY_TBK1_IKK_EPSILON	-0.47617796	-1.0316046	0.45792565	0.6314258	1.0
BIOCARTA_UCALPAIN_PATHWAY	-0.42120585	-1.0298733	0.47347740000000005	0.6317735	1.0
REACTOME_ACTIVATED_NOTCH1_TRANSMITS_SIGNAL_TO_THE_NUCLEUS	-0.4086837	-1.0287137	0.41600000000000004	0.6324692	1.0
REACTOME_PHOSPHOLIPID_METABOLISM	0.35153344	1.3973848999999998	0.042510122000000004	0.63327104	1.0
REACTOME_AKT_PHOSPHORYLATES_TARGETS_IN_THE_CYTOSOL	0.5314156999999999	1.3852838	0.11462451	0.63479877	1.0
BIOCARTA_FAS_PATHWAY	-0.35761609999999994	-1.0261284	0.41269842	0.6357467	1.0
REACTOME_BRANCHED_CHAIN_AMINO_ACID_CATABOLISM	0.6437111999999999	1.3737586000000002	0.13827655	0.63601035	1.0
BIOCARTA_CELLCYCLE_PATHWAY	-0.4023395	-1.0237858	0.43495935	0.6384963	1.0
BIOCARTA_IL12_PATHWAY	-0.67781264	-1.5632026	0.060784314000000006	0.63975185	0.997
REACTOME_PROCESSING_OF_CAPPED_INTRON_CONTAINING_PRE_MRNA	-0.3036472	-1.0215733	0.42915812	0.64136493	1.0
KEGG_SYSTEMIC_LUPUS_ERYTHEMATOSUS	-0.3648832	-1.017396	0.44848484	0.6419376	1.0
BIOCARTA_PROTEASOME_PATHWAY	-0.41286448	-1.0178236999999999	0.46198829999999996	0.64253134	1.0
KEGG_GLYCINE_SERINE_AND_THREONINE_METABOLISM	-0.38749040000000007	-1.0192857	0.4302554	0.64273995	1.0
REACTOME_INTEGRATION_OF_PROVIRUS	-0.43773779999999995	-1.0198985	0.45362905	0.6430531999999999	1.0
BIOCARTA_CCR5_PATHWAY	-0.5107917000000001	-1.0179019	0.47953215	0.64376837	1.0
KEGG_ENDOCYTOSIS	0.34431964	1.3974993	0.024691357999999997	0.6440283	1.0
KEGG_GLYCOSAMINOGLYCAN_DEGRADATION	-0.34121007	-1.0144701999999999	0.41300192	0.64555794	1.0
BIOCARTA_MITOCHONDRIA_PATHWAY	-0.37870390000000004	-1.0135839	0.42168674	0.64582753	1.0
REACTOME_NUCLEAR_SIGNALING_BY_ERBB4	0.50740165	1.3991332	0.055670105	0.6493038000000001	1.0
REACTOME_REGULATION_OF_KIT_SIGNALING	-0.69546264	-1.5647845	0.029821074	0.65042573	0.997
REACTOME_MEMBRANE_BINDING_AND_TARGETTING_OF_GAG_PROTEINS	-0.4447445	-1.0094513	0.45647970000000004	0.65186363	1.0
REACTOME_REGULATION_OF_WATER_BALANCE_BY_RENAL_AQUAPORINS	0.42817467	1.3661065000000001	0.09205021	0.65270424	1.0
KEGG_GLYCEROLIPID_METABOLISM	-0.31959897	-1.0080311	0.41743969999999997	0.6530661999999999	1.0
REACTOME_GABA_A_RECEPTOR_ACTIVATION	-0.41998613	-1.0031537	0.48987854	0.6549602	1.0
REACTOME_TRANSPORT_OF_VITAMINS_NUCLEOSIDES_AND_RELATED_MOLECULES	-0.31151754	-1.0054292999999999	0.46037737	0.65512043	1.0
REACTOME_RECRUITMENT_OF_NUMA_TO_MITOTIC_CENTROSOMES	-0.52797455	-1.0060280000000001	0.49180329999999994	0.65542084	1.0
REACTOME_CRMPS_IN_SEMA3A_SIGNALING	-0.65012103	-1.5841045	0.034623217000000005	0.6555969	0.993
KEGG_VASOPRESSIN_REGULATED_WATER_REABSORPTION	0.43270147	1.4004376	0.08506224	0.65565854	1.0
BIOCARTA_IL2RB_PATHWAY	-0.3386546	-1.0033064	0.43788190000000005	0.65603954	1.0
BIOCARTA_TNFR2_PATHWAY	-0.38203338	-1.0017241	0.46833014	0.6560779	1.0
REACTOME_FACILITATIVE_NA_INDEPENDENT_GLUCOSE_TRANSPORTERS	-0.41707498	-0.99590224	0.4742268	0.6568331000000001	1.0
BIOCARTA_IL3_PATHWAY	-0.41159743	-0.9974788	0.49108909999999995	0.65683424	1.0
REACTOME_TRIF_MEDIATED_TLR3_SIGNALING	-0.28242666	-0.99660856	0.44726562	0.6569453000000001	1.0
REACTOME_SEMA4D_IN_SEMAPHORIN_SIGNALING	-0.36637574	-0.99797785	0.47969052	0.65730757	1.0
BIOCARTA_EDG1_PATHWAY	-0.3477045	-1.0033834000000001	0.4422311	0.6573089	1.0
KEGG_TASTE_TRANSDUCTION	-0.3269764	-0.9990639000000001	0.47346938	0.6581231	1.0
REACTOME_NCAM_SIGNALING_FOR_NEURITE_OUT_GROWTH	-0.32365079999999996	-0.9983006999999999	0.40918162	0.658125	1.0
KEGG_STEROID_HORMONE_BIOSYNTHESIS	-0.39319745	-0.9993059000000001	0.44646466	0.6590939	1.0
KEGG_FOLATE_BIOSYNTHESIS	-0.43454012	-0.98926604	0.48360655	0.6606310999999999	1.0
REACTOME_NFKB_AND_MAP_KINASES_ACTIVATION_MEDIATED_BY_TLR4_SIGNALING_REPERTOIRE	-0.2990899	-0.99291694	0.45785442	0.6608672	1.0
BIOCARTA_GSK3_PATHWAY	-0.37547302	-0.9883653	0.47408828	0.6609573000000001	1.0
REACTOME_INTRINSIC_PATHWAY_FOR_APOPTOSIS	-0.33942562	-0.990334	0.4729459	0.66153985	1.0
REACTOME_METABOLISM_OF_AMINO_ACIDS_AND_DERIVATIVES	-0.29747596	-0.9894931999999999	0.45046729999999996	0.6616358	1.0
KEGG_MAPK_SIGNALING_PATHWAY	-0.23507702	-0.99037623	0.48565966	0.6628516	1.0
BIOCARTA_FEEDER_PATHWAY	-0.41314307	-0.9904115	0.47609943	0.6641649000000001	1.0
KEGG_NOTCH_SIGNALING_PATHWAY	-0.28390923	-0.980447	0.47254902	0.6654489	1.0
REACTOME_GPVI_MEDIATED_ACTIVATION_CASCADE	-0.38537428	-0.9805424	0.462	0.66661894	1.0
KEGG_GALACTOSE_METABOLISM	-0.5837376	-1.5655406	0.024761903999999998	0.66681594	0.997
REACTOME_GENERIC_TRANSCRIPTION_PATHWAY	0.3441686	1.4006493999999998	0.07129095	0.66693354	1.0
KEGG_AMINO_SUGAR_AND_NUCLEOTIDE_SUGAR_METABOLISM	-0.35378632	-0.9838517	0.46969697	0.6675991	1.0
REACTOME_PURINE_RIBONUCLEOSIDE_MONOPHOSPHATE_BIOSYNTHESIS	-0.44427150000000004	-0.98061335	0.48702595	0.66783434	1.0
REACTOME_GABA_B_RECEPTOR_ACTIVATION	-0.30260909999999996	-0.97807115	0.48732942	0.6682119000000001	1.0
BIOCARTA_CSK_PATHWAY	-0.4465095	-0.9809566999999999	0.5059055	0.6686603	1.0
REACTOME_SIGNALING_BY_RHO_GTPASES	-0.24664575	-0.9815526	0.456	0.6689951	1.0
KEGG_BETA_ALANINE_METABOLISM	0.5689505	1.3587226000000001	0.12448980000000001	0.6691408000000001	1.0
REACTOME_MTORC1_MEDIATED_SIGNALLING	-0.44349083	-0.98223376	0.46185568	0.6691774	1.0
REACTOME_SIGNALING_BY_FGFR1_MUTANTS	-0.294752	-0.9758462	0.48987854	0.6707309	1.0
REACTOME_LIPOPROTEIN_METABOLISM	-0.35047117	-0.9738071	0.4675835	0.6714536	1.0
REACTOME_TRAF6_MEDIATED_INDUCTION_OF_NFKB_AND_MAP_KINASES_UPON_TLR7_8_OR_9_ACTIVATION	-0.27918154	-0.97393245	0.5	0.6726121	1.0
REACTOME_PI3K_CASCADE	0.36176246	1.4023073	0.051923078	0.67262864	1.0
REACTOME_ABACAVIR_TRANSPORT_AND_METABOLISM	-0.43599677	-0.97148263	0.5124283	0.6726788	1.0
BIOCARTA_IL1R_PATHWAY	-0.29520959999999996	-0.9705676999999999	0.49900200000000006	0.6729235	1.0
REACTOME_NFKB_ACTIVATION_THROUGH_FADD_RIP1_PATHWAY_MEDIATED_BY_CASPASE_8_AND10	-0.44388428	-0.96884364	0.53174603	0.6731906	1.0
KEGG_RNA_DEGRADATION	-0.31483248	-0.9695659	0.49790794	0.67327565	1.0
REACTOME_DESTABILIZATION_OF_MRNA_BY_KSRP	-0.32827297	-0.9718323	0.48080808	0.6734019	1.0
REACTOME_ACETYLCHOLINE_NEUROTRANSMITTER_RELEASE_CYCLE	0.6767261999999999	1.3426093000000001	0.12015504	0.6762524000000001	1.0
BIOCARTA_RANKL_PATHWAY	-0.381668	-0.9627966999999998	0.528	0.6766554	1.0
BIOCARTA_RARRXR_PATHWAY	0.46273595	1.4046571	0.10059172	0.67675054	1.0
REACTOME_SIGNALING_BY_ERBB4	0.3884083	1.3397948999999998	0.070866145	0.67713004	1.0
REACTOME_ACYL_CHAIN_REMODELLING_OF_PI	-0.43481553	-0.9648474	0.4891945	0.67724806	1.0
BIOCARTA_PAR1_PATHWAY	-0.29389143	-0.9631364	0.49427479999999996	0.6774314	1.0
REACTOME_MRNA_PROCESSING	-0.27778614	-0.9638926	0.48659793	0.67748183	1.0
REACTOME_ACYL_CHAIN_REMODELLING_OF_PE	-0.38694826	-0.96491325	0.5059760999999999	0.67845947	1.0
REACTOME_OPSINS	-0.8095114000000001	-1.5843999	0.017716536	0.67899597	0.993
REACTOME_L1CAM_INTERACTIONS	-0.41217718	-1.5985357	0.018108651	0.6795536	0.9890000000000001
KEGG_PPAR_SIGNALING_PATHWAY	-0.38926172	-0.9591668	0.4990476	0.6800693	1.0
REACTOME_TRANSPORT_OF_ORGANIC_ANIONS	-0.394043	-0.9559780999999999	0.5256166999999999	0.6802596	1.0
BIOCARTA_ATRBRCA_PATHWAY	-0.35410815	-0.9596415	0.50701404	0.68067884	1.0
REACTOME_CHOLESTEROL_BIOSYNTHESIS	-0.42872506	-0.9572358	0.53722334	0.68083334	1.0
BIOCARTA_ARAP_PATHWAY	-0.37525272	-0.9548114	0.5175781	0.6808521	1.0
REACTOME_ACYL_CHAIN_REMODELLING_OF_PC	-0.37721209999999994	-0.9579544	0.5303326999999999	0.6809486	1.0
REACTOME_FRS2_MEDIATED_CASCADE	-0.2778755	-0.95366657	0.54451346	0.6814435999999999	1.0
REACTOME_PRESYNAPTIC_NICOTINIC_ACETYLCHOLINE_RECEPTORS	-0.38465965	-0.95606494	0.52	0.68145144	1.0
KEGG_DRUG_METABOLISM_CYTOCHROME_P450	0.5174593	1.3356136	0.0945674	0.6818420000000001	1.0
REACTOME_PHASE_II_CONJUGATION	0.45727667	1.34333	0.08203125	0.6834213	1.0
REACTOME_SMOOTH_MUSCLE_CONTRACTION	-0.4709456	-0.95170337	0.5511811	0.68346554	1.0
KEGG_OXIDATIVE_PHOSPHORYLATION	0.40145236	1.2798995000000002	0.26337448	0.68587786	1.0
BIOCARTA_MTA3_PATHWAY	0.54337454	1.2753981	0.15576923	0.68599194	1.0
REACTOME_BILE_ACID_AND_BILE_SALT_METABOLISM	0.45559183	1.2317799999999999	0.18125	0.68656725	1.0
REACTOME_ABCA_TRANSPORTERS_IN_LIPID_HOMEOSTASIS	0.6115459	1.4411435	0.07874016	0.68668425	1.0
KEGG_LIMONENE_AND_PINENE_DEGRADATION	0.4962117999999999	1.2335312	0.21729958	0.68735754	1.0
REACTOME_REGULATION_OF_INSULIN_SECRETION	0.3495986	1.2771168	0.125	0.68744326	1.0
REACTOME_MITOTIC_M_M_G1_PHASES	-0.60669315	-1.5658222	0.061728396	0.68751156	0.996
REACTOME_M_G1_TRANSITION	-0.6179697	-1.5921978	0.053784862	0.6886936	0.99
REACTOME_AMINE_LIGAND_BINDING_RECEPTORS	0.45142204	1.2858351000000001	0.24110672	0.6887064	1.0
REACTOME_SPHINGOLIPID_METABOLISM	0.45312962	1.4049714	0.09494949	0.68877405	1.0
BIOCARTA_AKAP13_PATHWAY	0.5668371	1.344406	0.13967611	0.6892704000000001	1.0
BIOCARTA_IGF1_PATHWAY	0.51848817	1.280989	0.15936255	0.68959814	1.0
BIOCARTA_GABA_PATHWAY	0.52206284	1.2696093000000002	0.23984526	0.6900343000000001	1.0
REACTOME_XENOBIOTICS	0.6182920999999999	1.4180428	0.09090909	0.6902031	1.0
REACTOME_GROWTH_HORMONE_RECEPTOR_SIGNALING	0.46488288	1.2342634	0.17092338	0.69128436	1.0
KEGG_PROPANOATE_METABOLISM	0.5674628	1.4108988	0.09394572	0.6922691999999999	1.0
REACTOME_GAP_JUNCTION_DEGRADATION	0.6014411	1.3464508999999998	0.11111111	0.6924414000000001	1.0
BIOCARTA_FMLP_PATHWAY	-0.2738815	-0.9450559000000001	0.52129817	0.6924498	1.0
REACTOME_ANDROGEN_BIOSYNTHESIS	-0.46332806	-0.9457359000000001	0.5483871	0.6926853000000001	1.0
KEGG_PROSTATE_CANCER	-0.25847712	-0.94408715	0.59695816	0.6927145	1.0
BIOCARTA_LONGEVITY_PATHWAY	0.5560404999999999	1.2359076999999998	0.21600000000000003	0.6929258	1.0
BIOCARTA_P35ALZHEIMERS_PATHWAY	0.60303366	1.2818806999999999	0.18934911	0.69394964	1.0
REACTOME_PI3K_EVENTS_IN_ERBB2_SIGNALING	0.40737715	1.2864375	0.12927757	0.6940438	1.0
REACTOME_ACTIVATION_OF_NMDA_RECEPTOR_UPON_GLUTAMATE_BINDING_AND_POSTSYNAPTIC_EVENTS	0.42094380000000003	1.2910991000000003	0.14629258	0.6943828000000001	1.0
KEGG_SNARE_INTERACTIONS_IN_VESICULAR_TRANSPORT	0.3795305	1.2437612	0.19206679999999998	0.6945951	1.0
KEGG_STARCH_AND_SUCROSE_METABOLISM	0.48396838	1.2703778000000001	0.13346228	0.694685	1.0
REACTOME_GOLGI_ASSOCIATED_VESICLE_BIOGENESIS	0.38912806	1.1967364999999999	0.25656566	0.6949622	1.0
BIOCARTA_IGF1R_PATHWAY	0.48637527	1.2500271	0.16498993	0.6950036	1.0
REACTOME_GAMMA_CARBOXYLATION_TRANSPORT_AND_AMINO_TERMINAL_CLEAVAGE_OF_PROTEINS	0.5066016	1.2044731000000002	0.22700587	0.69504625	1.0
REACTOME_SEROTONIN_RECEPTORS	0.5206462000000001	1.2457994	0.24708171	0.69507325	1.0
REACTOME_PKA_MEDIATED_PHOSPHORYLATION_OF_CREB	0.48901445	1.2392131000000002	0.17436975	0.69536704	1.0
REACTOME_CASPASE_MEDIATED_CLEAVAGE_OF_CYTOSKELETAL_PROTEINS	0.54665244	1.2955922	0.16116504	0.6953869	1.0
KEGG_OTHER_GLYCAN_DEGRADATION	0.59951514	1.4430313999999997	0.09915612	0.6957003	1.0
REACTOME_AQUAPORIN_MEDIATED_TRANSPORT	0.3533828	1.194497	0.2238806	0.69594073	1.0
REACTOME_REGULATION_OF_AMPK_ACTIVITY_VIA_LKB1	0.46654078	1.3182515	0.15927419	0.6959518	1.0
REACTOME_SYNTHESIS_OF_PIPS_AT_THE_EARLY_ENDOSOME_MEMBRANE	0.5694465	1.2061511999999999	0.26680243	0.69605786	1.0
BIOCARTA_PLATELETAPP_PATHWAY	0.57903665	1.1907012	0.25254583	0.6961647	1.0
KEGG_HISTIDINE_METABOLISM	0.47159009999999996	1.2881201999999998	0.12291667	0.69638866	1.0
REACTOME_GAP_JUNCTION_TRAFFICKING	0.4484138	1.3481404	0.1484375	0.69643325	1.0
KEGG_TYROSINE_METABOLISM	0.47537643	1.2584879999999998	0.15927419	0.6964855999999999	1.0
KEGG_RETINOL_METABOLISM	0.56445855	1.4469333	0.062626265	0.6966145	1.0
REACTOME_PI_METABOLISM	0.35424355	1.2018261000000001	0.22177419	0.6968169	1.0
REACTOME_PIP3_ACTIVATES_AKT_SIGNALING	0.38037795	1.2513758	0.16153847	0.69764745	1.0
REACTOME_DAG_AND_IP3_SIGNALING	0.46898982	1.4271711999999999	0.052313883	0.6977001	1.0
REACTOME_RAS_ACTIVATION_UOPN_CA2_INFUX_THROUGH_NMDA_RECEPTOR	0.49452612	1.2363084999999998	0.2524655	0.69772977	1.0
REACTOME_SYNTHESIS_OF_PC	0.4548235	1.1994066	0.23298968	0.69792175	1.0
REACTOME_HORMONE_LIGAND_BINDING_RECEPTORS	0.60093033	1.2469845	0.21455939	0.69805866	1.0
REACTOME_SIGNAL_ATTENUATION	0.48755097	1.1974837999999999	0.23952095	0.6980851	1.0
KEGG_ARACHIDONIC_ACID_METABOLISM	-0.32736093	-0.9398568000000002	0.5232558	0.69872963	1.0
KEGG_GLYCOSPHINGOLIPID_BIOSYNTHESIS_LACTO_AND_NEOLACTO_SERIES	-0.5584923	-1.5856626	0.027504912000000003	0.69944865	0.993
REACTOME_PI3K_AKT_ACTIVATION	0.42056787	1.3198186	0.09430256	0.6996766	1.0
REACTOME_METABOLISM_OF_PORPHYRINS	0.54968846	1.4192809	0.11904762	0.69971764	1.0
KEGG_DRUG_METABOLISM_OTHER_ENZYMES	0.4777055	1.2528573	0.1539961	0.6997675	1.0
REACTOME_RESPIRATORY_ELECTRON_TRANSPORT	0.47152814	1.2619058	0.28092244	0.6999973	1.0
REACTOME_BIOLOGICAL_OXIDATIONS	0.38007334	1.2066967	0.1659836	0.70000327	1.0
REACTOME_THROMBIN_SIGNALLING_THROUGH_PROTEINASE_ACTIVATED_RECEPTORS_PARS	0.39212227	1.2917386	0.17073171	0.70008445	1.0
REACTOME_NRIF_SIGNALS_CELL_DEATH_FROM_THE_NUCLEUS	0.52741605	1.4123389	0.10453649	0.7000892	1.0
REACTOME_TRANSMEMBRANE_TRANSPORT_OF_SMALL_MOLECULES	0.26646248	1.190956	0.11983471	0.7006015999999999	1.0
REACTOME_SYNTHESIS_OF_PIPS_AT_THE_GOLGI_MEMBRANE	0.44303897	1.2185689	0.25204918	0.70067644	1.0
REACTOME_PHOSPHOLIPASE_C_MEDIATED_CASCADE	0.38070756	1.3063216	0.092843324	0.7007265	1.0
REACTOME_ACTIVATION_OF_CHAPERONE_GENES_BY_ATF6_ALPHA	0.53900236	1.2395035	0.23173277	0.7007274	1.0
KEGG_BUTANOATE_METABOLISM	0.53948313	1.4053836000000002	0.08403361599999999	0.70104444	1.0
REACTOME_INSULIN_SYNTHESIS_AND_PROCESSING	0.57204926	1.2959857	0.14038461	0.70196474	1.0
REACTOME_PI3K_EVENTS_IN_ERBB4_SIGNALING	0.42056546	1.3272735	0.101960786	0.7019698	1.0
REACTOME_RNA_POL_I_TRANSCRIPTION_INITIATION	0.47101694	1.2540788999999999	0.20384616	0.7025642	1.0
REACTOME_RECYCLING_PATHWAY_OF_L1	-0.5504576999999999	-1.5672226	0.0234375	0.70263594	0.995
KEGG_HEDGEHOG_SIGNALING_PATHWAY	0.3795088	1.258608	0.14519428	0.70283496	1.0
REACTOME_TRAFFICKING_AND_PROCESSING_OF_ENDOSOMAL_TLR	-0.48003238	-0.9367129999999999	0.5613682	0.7029251	1.0
BIOCARTA_CTCF_PATHWAY	-0.37631664	-0.93593127	0.55220884	0.7029532	1.0
BIOCARTA_KERATINOCYTE_PATHWAY	-0.29744333	-0.9342771999999999	0.53696495	0.7029684	1.0
BIOCARTA_INSULIN_PATHWAY	0.44506377	1.2116966999999998	0.23517786	0.70300204	1.0
REACTOME_SYNTHESIS_OF_PIPS_AT_THE_PLASMA_MEMBRANE	0.47820429999999997	1.4295824	0.07385229	0.7036934	1.0
REACTOME_INTEGRIN_CELL_SURFACE_INTERACTIONS	-0.3256295	-0.9345213	0.5328031999999999	0.70398253	1.0
REACTOME_GLUCAGON_TYPE_LIGAND_RECEPTORS	0.3994583	1.3210863000000002	0.16438356	0.70415395	1.0
REACTOME_INFLUENZA_VIRAL_RNA_TRANSCRIPTION_AND_REPLICATION	0.31542329999999996	1.207176	0.30549899999999997	0.704205	1.0
REACTOME_INTEGRATION_OF_ENERGY_METABOLISM	0.33705187	1.3077285	0.09803922	0.7044146	1.0
REACTOME_GAP_JUNCTION_ASSEMBLY	0.5079726999999999	1.2090931	0.27634194	0.70476574	1.0
KEGG_FATTY_ACID_METABOLISM	0.4948883	1.3235086	0.14784394	0.705458	1.0
REACTOME_DARPP_32_EVENTS	0.48142374	1.2622423	0.18333334	0.7055339	1.0
REACTOME_PRE_NOTCH_EXPRESSION_AND_PROCESSING	-0.2872095	-0.9319719999999999	0.546875	0.7056266	1.0
REACTOME_ACTIVATION_OF_CHAPERONES_BY_ATF6_ALPHA	0.50389576	1.2187784	0.24793388	0.7058147	1.0
REACTOME_REGULATION_OF_INSULIN_SECRETION_BY_GLUCAGON_LIKE_PEPTIDE1	0.44595566	1.4527068	0.041257367	0.7072425999999999	1.0
REACTOME_BASE_FREE_SUGAR_PHOSPHATE_REMOVAL_VIA_THE_SINGLE_NUCLEOTIDE_REPLACEMENT_PATHWAY	0.58828765	1.2968616000000002	0.17008197	0.7072819	1.0
REACTOME_THROMBOXANE_SIGNALLING_THROUGH_TP_RECEPTOR	0.40183747	1.2121108999999999	0.20876826	0.7074723	1.0
KEGG_RIBOFLAVIN_METABOLISM	0.44017744	1.1807121	0.25154638	0.70780295	1.0
BIOCARTA_PLCE_PATHWAY	0.5267179	1.2220958	0.23553719	0.70793915	1.0
REACTOME_DEFENSINS	-0.7672094	-1.5988548	0.008230452	0.7080958	0.9890000000000001
BIOCARTA_SHH_PATHWAY	0.46785426	1.2197334999999998	0.24089068	0.7086003000000001	1.0
REACTOME_TRAFFICKING_OF_GLUR2_CONTAINING_AMPA_RECEPTORS	0.47393554	1.1783834	0.25948104	0.7088413	1.0
REACTOME_SYNTHESIS_OF_BILE_ACIDS_AND_BILE_SALTS	0.52429295	1.3087533000000002	0.12288135	0.70967025	1.0
REACTOME_INHIBITION_OF_INSULIN_SECRETION_BY_ADRENALINE_NORADRENALINE	0.41729823	1.1761051000000002	0.25813007	0.7099647	1.0
BIOCARTA_LEPTIN_PATHWAY	0.54052484	1.2131326	0.24173553	0.7100941	1.0
REACTOME_FGFR4_LIGAND_BINDING_AND_ACTIVATION	-0.3687499	-0.92757946	0.56487024	0.71031946	1.0
REACTOME_RESPIRATORY_ELECTRON_TRANSPORT_ATP_SYNTHESIS_BY_CHEMIOSMOTIC_COUPLING_AND_HEAT_PRODUCTION_BY_UNCOUPLING_PROTEINS_	0.4525995	1.2984768	0.24844721	0.7104626	1.0
KEGG_PENTOSE_AND_GLUCURONATE_INTERCONVERSIONS	0.620672	1.1834679	0.28710938	0.71068984	1.0
REACTOME_MUSCLE_CONTRACTION	-0.35572356	-0.92805314	0.562249	0.7108635999999999	1.0
KEGG_AMYOTROPHIC_LATERAL_SCLEROSIS_ALS	-0.25339870000000003	-0.9246674000000001	0.5812133	0.7113345999999999	1.0
REACTOME_BILE_SALT_AND_ORGANIC_ANION_SLC_TRANSPORTERS	-0.4488113	-0.926163	0.563327	0.711386	1.0
REACTOME_REGULATION_OF_GLUCOKINASE_BY_GLUCOKINASE_REGULATORY_PROTEIN	-0.58780855	-1.5700481000000002	0.0524109	0.7114264	0.995
REACTOME_REVERSIBLE_HYDRATION_OF_CARBON_DIOXIDE	0.55890703	1.1811147	0.28239846	0.71185666	1.0
REACTOME_GLYCOPROTEIN_HORMONES	0.5775772	1.1314336	0.3266533	0.7123771	1.0
REACTOME_DOWNREGULATION_OF_ERBB2_ERBB3_SIGNALING	0.56492335	1.4199678999999998	0.103174604	0.71238875	1.0
KEGG_ALDOSTERONE_REGULATED_SODIUM_REABSORPTION	-0.29011422	-0.9247109	0.58301157	0.712611	1.0
REACTOME_KERATAN_SULFATE_DEGRADATION	0.73934853	1.2999368	0.18273093	0.713881	1.0
REACTOME_NRAGE_SIGNALS_DEATH_THROUGH_JNK	-0.24792968	-0.9224001000000001	0.5765956999999999	0.71398634	1.0
REACTOME_DIABETES_PATHWAYS	-0.26633212	-0.9214866	0.60305345	0.71410155	1.0
REACTOME_ZINC_TRANSPORTERS	0.67291576	1.4470803	0.06521739	0.7141991	1.0
BIOCARTA_VIP_PATHWAY	0.4309933	1.1374246000000001	0.29838709999999996	0.71485186	1.0
BIOCARTA_MPR_PATHWAY	-0.31582436	-0.91998863	0.57915056	0.7153201	1.0
REACTOME_REGULATION_OF_RHEB_GTPASE_ACTIVITY_BY_AMPK	0.44637203	1.1316646000000001	0.3204868	0.71616024	1.0
REACTOME_HS_GAG_BIOSYNTHESIS	0.42708704	1.1280614	0.28874734	0.71664524	1.0
REACTOME_GLUCAGON_SIGNALING_IN_METABOLIC_REGULATION	0.43362609999999996	1.3092675	0.108333334	0.7168802	1.0
BIOCARTA_ACE2_PATHWAY	0.5507226	1.1384252000000001	0.27272728	0.71695167	1.0
REACTOME_ENERGY_DEPENDENT_REGULATION_OF_MTOR_BY_LKB1_AMPK	0.47569399999999995	1.430279	0.115913555	0.7173676	1.0
BIOCARTA_AHSP_PATHWAY	0.45195755	1.132587	0.33950618	0.7183178000000001	1.0
BIOCARTA_ACH_PATHWAY	-0.33093435	-0.9101855	0.54296875	0.7185074	1.0
KEGG_VIBRIO_CHOLERAE_INFECTION	-0.29311872	-0.91399777	0.57925636	0.7186544	1.0
BIOCARTA_TEL_PATHWAY	0.39801762	1.1411108	0.28543308	0.71911335	1.0
REACTOME_GLUCURONIDATION	0.73014647	1.1392223	0.33459356	0.71935135	1.0
REACTOME_PLATELET_AGGREGATION_PLUG_FORMATION	-0.30923477	-0.9127389000000001	0.57731956	0.7195015	1.0
REACTOME_GASTRIN_CREB_SIGNALLING_PATHWAY_VIA_PKC_AND_MAPK	-0.22445196	-0.91033673	0.6237816999999999	0.71957034	1.0
REACTOME_INHIBITION_OF_VOLTAGE_GATED_CA2_CHANNELS_VIA_GBETA_GAMMA_SUBUNITS	-0.3119783	-0.91424054	0.60248446	0.7195811	1.0
KEGG_NITROGEN_METABOLISM	0.4454826	1.1336998999999999	0.29	0.71990114	1.0
REACTOME_FORMATION_OF_FIBRIN_CLOT_CLOTTING_CASCADE	-0.36823097	-0.9082882	0.6091954	0.72031105	1.0
REACTOME_TRANSFERRIN_ENDOCYTOSIS_AND_RECYCLING	-0.34853306	-0.9104696	0.5816733000000001	0.7206911	1.0
REACTOME_AMINE_COMPOUND_SLC_TRANSPORTERS	-0.35533884	-0.9143481	0.56740445	0.72072047	1.0
BIOCARTA_MAPK_PATHWAY	-0.23710895	-0.91125447	0.59045726	0.7207541999999999	1.0
REACTOME_APOPTOTIC_EXECUTION_PHASE	-0.29158574	-0.91462916	0.57708335	0.7216004	1.0
REACTOME_INTERACTION_BETWEEN_L1_AND_ANKYRINS	-0.31906409999999996	-0.90677774	0.5590550999999999	0.721617	1.0
BIOCARTA_AKT_PATHWAY	0.4266225	1.1418738000000002	0.2972973	0.7218288	1.0
REACTOME_SIGNALING_BY_ROBO_RECEPTOR	-0.31760427	-0.91486365	0.606	0.7225696999999999	1.0
REACTOME_ETHANOL_OXIDATION	0.7187845	1.1689886999999999	0.30722892	0.7236453	1.0
KEGG_ALANINE_ASPARTATE_AND_GLUTAMATE_METABOLISM	0.41584447	1.1483437	0.25	0.7239536	1.0
REACTOME_VOLTAGE_GATED_POTASSIUM_CHANNELS	0.38687938	1.1211532	0.375	0.7244979	1.0
BIOCARTA_IL4_PATHWAY	0.48006025	1.1229198999999999	0.31619048	0.72461915	1.0
REACTOME_DOPAMINE_NEUROTRANSMITTER_RELEASE_CYCLE	0.72037864	1.4531558999999998	0.046904314	0.7248988000000001	1.0
KEGG_HUNTINGTONS_DISEASE	0.30843127	1.1645964	0.28830644	0.72513604	1.0
REACTOME_ALPHA_LINOLENIC_ACID_ALA_METABOLISM	0.54185176	1.1421052	0.31097559999999996	0.7258140000000001	1.0
REACTOME_METABOLISM_OF_VITAMINS_AND_COFACTORS	0.3819269	1.1438413	0.2518797	0.7258218000000001	1.0
KEGG_ABC_TRANSPORTERS	0.3846881	1.1600224	0.2376033	0.7267840999999999	1.0
REACTOME_IRAK2_MEDIATED_ACTIVATION_OF_TAK1_COMPLEX_UPON_TLR7_8_OR_9_STIMULATION	-0.3828554	-0.9020607	0.5445344	0.72704613	1.0
REACTOME_AMINE_DERIVED_HORMONES	0.58515924	1.1450764	0.27360308	0.7273642	1.0
REACTOME_CHONDROITIN_SULFATE_DERMATAN_SULFATE_METABOLISM	-0.35351753	-0.9002190999999999	0.5834933000000001	0.72739494	1.0
KEGG_UBIQUITIN_MEDIATED_PROTEOLYSIS	-0.25065172	-0.9026139000000001	0.60649085	0.7274119000000001	1.0
REACTOME_ACTIVATION_OF_ATR_IN_RESPONSE_TO_REPLICATION_STRESS	-0.7490781999999999	-1.6009891	0.02892562	0.7274531	0.988
BIOCARTA_CBL_PATHWAY	-0.3905721	-0.89926994	0.59836066	0.7275986	1.0
REACTOME_IRON_UPTAKE_AND_TRANSPORT	-0.34203112	-0.9008601	0.6065259	0.72773194	1.0
REACTOME_TRANS_GOLGI_NETWORK_VESICLE_BUDDING	0.38069385	1.1577117000000001	0.28979590000000005	0.7279941999999999	1.0
KEGG_BIOSYNTHESIS_OF_UNSATURATED_FATTY_ACIDS	0.49078646	1.1484696	0.28235295	0.7283238000000001	1.0
BIOCARTA_P53_PATHWAY	0.44213268	1.1651468	0.25482625	0.7285995	1.0
BIOCARTA_CHREBP2_PATHWAY	0.37415192	1.1498075	0.31034482	0.72954184	1.0
REACTOME_RNA_POL_I_TRANSCRIPTION_TERMINATION	0.46136296	1.1551688	0.2781186	0.7298424	1.0
REACTOME_TRANSPORT_OF_GLUCOSE_AND_OTHER_SUGARS_BILE_SALTS_AND_ORGANIC_ACIDS_METAL_IONS_AND_AMINE_COMPOUNDS	0.34478942	1.1512598	0.21814255	0.7304566	1.0
BIOCARTA_GH_PATHWAY	0.39293933	1.1604842	0.26653308	0.73056656	1.0
REACTOME_OPIOID_SIGNALLING	-0.24633741	-0.8957050999999999	0.64030135	0.73223203	1.0
REACTOME_MRNA_SPLICING_MINOR_PATHWAY	-0.3187375	-0.89462817	0.5735294	0.73269916	1.0
REACTOME_P75_NTR_RECEPTOR_MEDIATED_SIGNALLING	-0.21961248	-0.8930877	0.59100205	0.73402154	1.0
KEGG_RENIN_ANGIOTENSIN_SYSTEM	0.5219170999999999	1.151398	0.2752475	0.73495865	1.0
REACTOME_ADENYLATE_CYCLASE_INHIBITORY_PATHWAY	-0.3634108	-0.89110327	0.6137255	0.73590904	1.0
REACTOME_NOREPINEPHRINE_NEUROTRANSMITTER_RELEASE_CYCLE	0.7662274	1.4543053999999997	0.034816246	0.74048036	1.0
REACTOME_EGFR_DOWNREGULATION	-0.28655890000000006	-0.88743746	0.6	0.7405832	1.0
REACTOME_PEPTIDE_HORMONE_BIOSYNTHESIS	0.5484104999999999	1.059496	0.41520467	0.74096173	1.0
KEGG_INSULIN_SIGNALING_PATHWAY	0.26236555	1.0635291	0.3574297	0.742875	1.0
KEGG_INOSITOL_PHOSPHATE_METABOLISM	0.31100523	1.0682341	0.344	0.74364805	1.0
REACTOME_MAPK_TARGETS_NUCLEAR_EVENTS_MEDIATED_BY_MAP_KINASES	0.3926113	1.0564938	0.38934427	0.74403656	1.0
REACTOME_SYNTHESIS_OF_BILE_ACIDS_AND_BILE_SALTS_VIA_24_HYDROXYCHOLESTEROL	0.52450466	1.059703	0.40416667	0.7442044	1.0
REACTOME_PI_3K_CASCADE	0.29532167	1.1041341	0.29094413	0.74467444	1.0
KEGG_PORPHYRIN_AND_CHLOROPHYLL_METABOLISM	0.43337578	1.0639489	0.3992016	0.74562204	1.0
REACTOME_DOWNREGULATION_OF_SMAD2_3_SMAD4_TRANSCRIPTIONAL_ACTIVITY	-0.30029956	-0.8804128000000001	0.5983773	0.7457464	1.0
KEGG_DILATED_CARDIOMYOPATHY	0.3041967	1.0655311	0.35477179999999997	0.7458218000000001	1.0
REACTOME_APOPTOTIC_CLEAVAGE_OF_CELLULAR_PROTEINS	-0.30338806	-0.88190657	0.6363635999999999	0.7458306	1.0
REACTOME_DOWNSTREAM_SIGNAL_TRANSDUCTION	-0.22880511	-0.88084793	0.67196816	0.74630696	1.0
REACTOME_SRP_DEPENDENT_COTRANSLATIONAL_PROTEIN_TARGETING_TO_MEMBRANE	0.28078336	1.1051593000000002	0.35881105	0.74638903	1.0
REACTOME_G1_PHASE	0.34413790000000005	1.0602448	0.37381405	0.74672645	1.0
REACTOME_VITAMIN_B5_PANTOTHENATE_METABOLISM	0.48823246	1.0962243	0.33459356	0.7468818	1.0
REACTOME_VEGF_LIGAND_RECEPTOR_INTERACTIONS	-0.41772762	-0.8820531999999999	0.59063137	0.74694395	1.0
REACTOME_SIGNALING_BY_ERBB2	0.27572290000000005	1.0684339	0.29940120000000003	0.7469949	1.0
REACTOME_TRAFFICKING_OF_AMPA_RECEPTORS	0.5070734	1.4573136999999998	0.05788423	0.74727696	1.0
KEGG_METABOLISM_OF_XENOBIOTICS_BY_CYTOCHROME_P450	0.41869049999999997	1.0700698	0.35593220000000003	0.74727964	1.0
REACTOME_POST_TRANSLATIONAL_PROTEIN_MODIFICATION	0.30369118	1.1011957	0.29375	0.7476543000000001	1.0
REACTOME_SYNTHESIS_SECRETION_AND_INACTIVATION_OF_GLP1	0.43371278	1.0715066	0.366	0.74809396	1.0
BIOCARTA_PML_PATHWAY	-0.3246436	-0.88210386	0.60491496	0.74819475	1.0
BIOCARTA_BARRESTIN_PATHWAY	0.46278265	1.1078013	0.33399209999999996	0.7484721999999999	1.0
REACTOME_PROSTACYCLIN_SIGNALLING_THROUGH_PROSTACYCLIN_RECEPTOR	0.37237057	1.1054906999999998	0.30923694	0.749777	1.0
REACTOME_MRNA_DECAY_BY_5_TO_3_EXORIBONUCLEASE	-0.3626041	-0.87710977	0.5737051999999999	0.74995846	1.0
REACTOME_SYNTHESIS_OF_SUBSTRATES_IN_N_GLYCAN_BIOSYTHESIS	0.43188940000000003	1.0720427	0.37791932	0.75067157	1.0
REACTOME_GLYCOGEN_BREAKDOWN_GLYCOGENOLYSIS	0.4516464	1.0963040000000002	0.33817428	0.75088125	1.0
REACTOME_METABOLISM_OF_LIPIDS_AND_LIPOPROTEINS	0.27527598	1.1085273000000002	0.21848739999999997	0.7510433000000001	1.0
REACTOME_ACTIVATED_AMPK_STIMULATES_FATTY_ACID_OXIDATION_IN_MUSCLE	0.40951902	1.0978854999999998	0.35668790000000006	0.75111336	1.0
REACTOME_SIGNALING_BY_WNT	-0.30099016	-0.87455	0.6102361999999999	0.7516397	1.0
BIOCARTA_PPARA_PATHWAY	-0.29806218	-0.8751628	0.64915574	0.7519013000000001	1.0
REACTOME_DEADENYLATION_OF_MRNA	0.4360991	1.0783964	0.37714285	0.7520892	1.0
BIOCARTA_TGFB_PATHWAY	0.37248459999999994	1.0800493	0.359375	0.7522283000000001	1.0
KEGG_NEUROACTIVE_LIGAND_RECEPTOR_INTERACTION	0.29008603	1.0730473	0.38123754	0.7523890000000001	1.0
REACTOME_HIGHLY_CALCIUM_PERMEABLE_POSTSYNAPTIC_NICOTINIC_ACETYLCHOLINE_RECEPTORS	-0.38382775	-0.8726814	0.63188976	0.75339884	1.0
BIOCARTA_AMI_PATHWAY	0.5098569000000001	1.075907	0.35365853	0.7539292	1.0
REACTOME_MRNA_SPLICING	-0.25586	-0.87097603	0.5562372	0.7549142	1.0
BIOCARTA_PDGF_PATHWAY	-0.30457994	-0.86833626	0.610101	0.7552481	1.0
REACTOME_TRANSCRIPTION_COUPLED_NER_TC_NER	-0.29124716	-0.86985546	0.58906883	0.7554656	1.0
REACTOME_INCRETIN_SYNTHESIS_SECRETION_AND_INACTIVATION	0.41098082	1.0803148	0.33811477	0.75565827	1.0
KEGG_LYSOSOME	-0.25955513	-0.8687814	0.6159696	0.755867	1.0
REACTOME_INSULIN_RECEPTOR_SIGNALLING_CASCADE	0.2680761	1.0906312	0.3	0.7559968	1.0
REACTOME_FORMATION_OF_TRANSCRIPTION_COUPLED_NER_TC_NER_REPAIR_COMPLEX	0.36776474	1.073081	0.38722554	0.75628513	1.0
REACTOME_GLYCEROPHOSPHOLIPID_BIOSYNTHESIS	0.29905912	1.0833861999999999	0.30661324	0.7566681	1.0
KEGG_ADIPOCYTOKINE_SIGNALING_PATHWAY	0.32272112	1.0815964	0.35306123	0.75671035	1.0
REACTOME_RNA_POL_III_CHAIN_ELONGATION	0.43996709999999994	1.0844383999999998	0.36726546	0.75829035	1.0
REACTOME_ORGANIC_CATION_ANION_ZWITTERION_TRANSPORT	0.77149016	1.6682099	0.004016064000000001	0.75832486	0.888
REACTOME_ION_CHANNEL_TRANSPORT	0.30393994	1.0436708000000001	0.3910387	0.7583706	1.0
REACTOME_SIGNALING_BY_INSULIN_RECEPTOR	0.26529068	1.046799	0.37843138	0.7585221	1.0
REACTOME_ERKS_ARE_INACTIVATED	0.47902817	1.0449095	0.44140625	0.75917584	1.0
BIOCARTA_IL6_PATHWAY	-0.3266571	-0.86405456	0.64040405	0.75944847	1.0
REACTOME_GLUTATHIONE_CONJUGATION	-0.32979494	-0.8646921000000001	0.65510947	0.75978684	1.0
REACTOME_COPI_MEDIATED_TRANSPORT	0.47853670000000004	1.0469677	0.45416668	0.76183766	1.0
KEGG_HYPERTROPHIC_CARDIOMYOPATHY_HCM	0.31175390000000003	1.0862569	0.31097559999999996	0.7620413	1.0
REACTOME_G0_AND_EARLY_G1	-0.7706606	-1.6012594	0.008213553	0.76206225	0.987
REACTOME_GLUTAMATE_NEUROTRANSMITTER_RELEASE_CYCLE	0.65972584	1.4633498999999999	0.04606526	0.76208806	1.0
REACTOME_NGF_SIGNALLING_VIA_TRKA_FROM_THE_PLASMA_MEMBRANE	0.26956365	1.0844477	0.3211382	0.7624223000000001	1.0
BIOCARTA_ALK_PATHWAY	0.31015240000000005	1.0393371999999999	0.40079364	0.7640628	1.0
BIOCARTA_PGC1A_PATHWAY	-0.27385846	-0.8588473	0.6347656	0.76534927	1.0
KEGG_NON_HOMOLOGOUS_END_JOINING	-0.3239704	-0.85899687	0.62899786	0.7664843000000001	1.0
KEGG_CARDIAC_MUSCLE_CONTRACTION	0.38652983	1.4578551000000002	0.06418219	0.76692516	1.0
REACTOME_ASSOCIATION_OF_TRIC_CCT_WITH_TARGET_PROTEINS_DURING_BIOSYNTHESIS	-0.28037313	-0.8565568000000001	0.6500994000000001	0.76790327	1.0
KEGG_COLORECTAL_CANCER	-0.25372753	-0.8545405999999999	0.7014028	0.77000195	1.0
BIOCARTA_HER2_PATHWAY	0.542303	1.4666866000000003	0.04828974	0.77009374	1.0
REACTOME_PTM_GAMMA_CARBOXYLATION_HYPUSINE_FORMATION_AND_ARYLSULFATASE_ACTIVATION	0.33559734	1.0009749	0.45238096	0.77042574	1.0
REACTOME_3_UTR_MEDIATED_TRANSLATIONAL_REGULATION	0.28833067	1.034606	0.43723848	0.77111095	1.0
REACTOME_SIGNALING_BY_NOTCH4	0.4674008	0.99708724	0.44489795	0.7721319000000001	1.0
BIOCARTA_BAD_PATHWAY	0.38846537	1.0030576999999998	0.48400852	0.7728543999999999	1.0
REACTOME_SIGNALING_BY_FGFR3_MUTANTS	0.40650406	1.0012562	0.43495935	0.7732673000000001	1.0
REACTOME_NONSENSE_MEDIATED_DECAY_ENHANCED_BY_THE_EXON_JUNCTION_COMPLEX	0.24441165	0.9932270000000001	0.44861660000000003	0.7736941999999999	1.0
BIOCARTA_WNT_PATHWAY	0.35807765	0.9976696	0.43967280000000003	0.77422756	1.0
REACTOME_RNA_POL_I_TRANSCRIPTION	0.36791036	0.99439377	0.4625984	0.7744909000000001	1.0
REACTOME_INFLUENZA_LIFE_CYCLE	-0.19822383	-0.8506488000000001	0.58232933	0.7748811999999999	1.0
KEGG_GLYCOSAMINOGLYCAN_BIOSYNTHESIS_HEPARAN_SULFATE	0.33163851	1.0035892	0.43902440000000004	0.7751998000000001	1.0
KEGG_CHRONIC_MYELOID_LEUKEMIA	-0.23108748	-0.8453176	0.7424546999999999	0.7756774000000001	1.0
REACTOME_NUCLEAR_EVENTS_KINASE_AND_TRANSCRIPTION_FACTOR_ACTIVATION	0.38071993	1.0308738000000002	0.43960395	0.7758959	1.0
BIOCARTA_NOS1_PATHWAY	0.38707805	1.0048501	0.47619048	0.77602136	1.0
REACTOME_POTASSIUM_CHANNELS	-0.24990629	-0.847944	0.6627219	0.77663636	1.0
REACTOME_THE_ACTIVATION_OF_ARYLSULFATASES	-0.40197814	-0.84637207	0.626	0.77663994	1.0
BIOCARTA_CDK5_PATHWAY	-0.32027748	-0.8487315000000001	0.65537846	0.77666146	1.0
REACTOME_SIGNALING_BY_FGFR1_FUSION_MUTANTS	-0.32000056	-0.84546846	0.6753507	0.7767672	1.0
BIOCARTA_CALCINEURIN_PATHWAY	-0.30710235	-0.84288085	0.6506024	0.77697766	1.0
REACTOME_CHROMOSOME_MAINTENANCE	-0.29106045	-0.8468504000000001	0.6506276	0.77718574	1.0
REACTOME_ANTIGEN_PROCESSING_UBIQUITINATION_PROTEASOME_DEGRADATION	-0.24743684	-0.84344506	0.66129035	0.7773705	1.0
REACTOME_MEIOSIS	0.32931513	1.0054291	0.44990176	0.7781853	1.0
KEGG_PANTOTHENATE_AND_COA_BIOSYNTHESIS	0.40735945	0.98799235	0.47907948	0.7783273	1.0
BIOCARTA_AGR_PATHWAY	-0.24686082	-0.84053963	0.6989899	0.779442	1.0
REACTOME_ENDOSOMAL_SORTING_COMPLEX_REQUIRED_FOR_TRANSPORT_ESCRT	0.3964094	1.0274478	0.43786982	0.78011465	1.0
REACTOME_PKB_MEDIATED_EVENTS	0.31274498	1.025669	0.42471042	0.78023505	1.0
KEGG_PHENYLALANINE_METABOLISM	0.4271798	0.9885924	0.4779874	0.78039765	1.0
BIOCARTA_TPO_PATHWAY	-0.31668416	-0.83911246	0.6666667	0.7805064	1.0
REACTOME_MITOCHONDRIAL_PROTEIN_IMPORT	-0.28351218	-0.8380127	0.63821137	0.78083706	1.0
REACTOME_METABOLISM_OF_MRNA	-0.20882885	-0.8369321	0.6313645999999999	0.78134084	1.0
REACTOME_SIGNALING_BY_NOTCH2	0.4797286	1.0055227	0.45528457	0.7814181	1.0
REACTOME_SIGNALING_BY_FGFR	0.24118462	1.023064	0.41188118	0.782269	1.0
KEGG_PRIMARY_BILE_ACID_BIOSYNTHESIS	0.40403607	1.006292	0.43870968	0.7831621999999999	1.0
REACTOME_PROTEOLYTIC_CLEAVAGE_OF_SNARE_COMPLEX_PROTEINS	0.33501545	0.98219144	0.48879838	0.7838601	1.0
REACTOME_DOWNSTREAM_SIGNALING_OF_ACTIVATED_FGFR	0.24164715	1.00739	0.4405458	0.7842596	1.0
KEGG_PARKINSONS_DISEASE	0.29898173	0.9824610999999999	0.47021276	0.78647226	1.0
REACTOME_NFKB_IS_ACTIVATED_AND_SIGNALS_SURVIVAL	0.33881626	0.9774976999999999	0.48046875	0.7873625	1.0
REACTOME_G_ALPHA_S_SIGNALLING_EVENTS	0.27539554	1.0074419	0.42975205	0.78772706	1.0
REACTOME_GLUCOSE_METABOLISM	-0.26767454	-0.83167225	0.7062257	0.7882954000000001	1.0
REACTOME_ABC_FAMILY_PROTEINS_MEDIATED_TRANSPORT	0.53609544	1.4679815	0.030303031	0.7888901	1.0
BIOCARTA_EIF4_PATHWAY	0.38118964	0.97785884	0.47868216	0.7898499	1.0
BIOCARTA_MET_PATHWAY	-0.2625604	-0.82886696	0.6725146	0.7900349	1.0
REACTOME_G_BETA_GAMMA_SIGNALLING_THROUGH_PLC_BETA	0.33787543	1.0078076999999999	0.428	0.7905733	1.0
BIOCARTA_MCM_PATHWAY	-0.78877664	-1.6029248	0.014830508000000001	0.7907944	0.985
REACTOME_COLLAGEN_FORMATION	-0.38562379999999996	-0.82892513	0.6595331	0.79129595	1.0
BIOCARTA_NGF_PATHWAY	-0.30760476	-0.8269064	0.6780684	0.79181397	1.0
REACTOME_TRANSPORT_TO_THE_GOLGI_AND_SUBSEQUENT_MODIFICATION	0.32718873	1.0082959	0.45019922	0.79304427	1.0
REACTOME_LIGAND_GATED_ION_CHANNEL_TRANSPORT	0.3851966	1.0086544	0.48514852	0.79593414	1.0
KEGG_RNA_POLYMERASE	-0.2907066	-0.82237023	0.68247426	0.79617053	1.0
REACTOME_SIGNALING_BY_FGFR_MUTANTS	-0.23292992	-0.8226059000000001	0.7770961	0.79715514	1.0
KEGG_CALCIUM_SIGNALING_PATHWAY	0.24934283	1.0128015	0.42200000000000004	0.7977988	1.0
BIOCARTA_VDR_PATHWAY	0.41518685	1.0144520000000001	0.43762782	0.79790366	1.0
REACTOME_GLYCOSAMINOGLYCAN_METABOLISM	-0.2688469	-0.8203125	0.7165049	0.7980574	1.0
REACTOME_ION_TRANSPORT_BY_P_TYPE_ATPASES	0.30515552	0.9657805	0.50955415	0.7983802	1.0
REACTOME_RNA_POL_III_TRANSCRIPTION_INITIATION_FROM_TYPE_2_PROMOTER	0.35227937	1.0087957	0.46078432	0.79922146	1.0
REACTOME_CA_DEPENDENT_EVENTS	0.3347605	0.96979225	0.48739496	0.80021876	1.0
REACTOME_SIGNALLING_BY_NGF	0.22764449	1.0097868	0.42406312	0.8006741999999999	1.0
REACTOME_SIGNALING_BY_NOTCH3	0.460978	0.9660380999999999	0.48879838	0.8011088000000001	1.0
REACTOME_STRIATED_MUSCLE_CONTRACTION	-0.31410279999999996	-0.8172474000000001	0.6963563	0.8015598	1.0
REACTOME_POST_NMDA_RECEPTOR_ACTIVATION_EVENTS	0.30369717	0.962516	0.5102041	0.8016837	1.0
REACTOME_G_BETA_GAMMA_SIGNALLING_THROUGH_PI3KGAMMA	0.31249198	0.9672618000000001	0.5009901	0.8019881	1.0
BIOCARTA_EGF_PATHWAY	-0.28863785	-0.81427544	0.7265469	0.80342525	1.0
REACTOME_FGFR1_LIGAND_BINDING_AND_ACTIVATION	-0.3176465	-0.81488264	0.6599189999999999	0.80372185	1.0
BIOCARTA_TID_PATHWAY	-0.31476548	-0.8119326	0.73540854	0.8057137	1.0
REACTOME_STEROID_HORMONES	-0.3058012	-0.80983436	0.7344064	0.80772185	1.0
BIOCARTA_BCELLSURVIVAL_PATHWAY	-0.31489933	-0.80865884	0.7285429	0.80826354	1.0
REACTOME_CELL_SURFACE_INTERACTIONS_AT_THE_VASCULAR_WALL	-0.60128	-1.6699368000000003	0.0	0.8090335	0.925
REACTOME_G2_M_CHECKPOINTS	-0.7677345	-1.6061922	0.020920502	0.80990237	0.983
KEGG_ALZHEIMERS_DISEASE	0.23948888	0.94723153	0.52556235	0.8106926999999999	1.0
KEGG_PROXIMAL_TUBULE_BICARBONATE_RECLAMATION	0.35347998	0.9407511000000001	0.5365854	0.8109974	1.0
KEGG_SPHINGOLIPID_METABOLISM	0.349509	0.9454513000000001	0.5327869000000001	0.81113786	1.0
KEGG_O_GLYCAN_BIOSYNTHESIS	0.39529377	0.9483748	0.5313131	0.81149495	1.0
REACTOME_SYNTHESIS_OF_BILE_ACIDS_AND_BILE_SALTS_VIA_7ALPHA_HYDROXYCHOLESTEROL	0.7558724	1.6443055	0.00617284	0.8118470999999999	0.9179999999999999
REACTOME_EICOSANOID_LIGAND_BINDING_RECEPTORS	0.34708577	0.94114935	0.51689863	0.8133855999999999	1.0
REACTOME_SIGNALING_BY_FGFR_IN_DISEASE	0.22280906	0.9553933000000001	0.5322895999999999	0.81354505	1.0
REACTOME_RNA_POL_III_TRANSCRIPTION_INITIATION_FROM_TYPE_3_PROMOTER	0.3276929	0.9486720999999999	0.501938	0.8142142	1.0
REACTOME_HORMONE_SENSITIVE_LIPASE_HSL_MEDIATED_TRIACYLGLYCEROL_HYDROLYSIS	0.50038505	0.9375386999999998	0.5618449000000001	0.8142459	1.0
REACTOME_PEPTIDE_CHAIN_ELONGATION	0.43740374	1.4681375	0.16699411	0.81518763	1.0
REACTOME_PACKAGING_OF_TELOMERE_ENDS	0.44646737	0.9411721	0.56573707	0.81653696	1.0
REACTOME_G_ALPHA1213_SIGNALLING_EVENTS	0.24149859	0.94883376	0.534	0.81713307	1.0
KEGG_PROTEIN_EXPORT	0.36232194	0.9503584999999999	0.49284253	0.8173222	1.0
REACTOME_FATTY_ACID_TRIACYLGLYCEROL_AND_KETONE_BODY_METABOLISM	-0.22601621	-0.80128014	0.82217973	0.8182959	1.0
REACTOME_MYOGENESIS	-0.24160188	-0.8000706999999999	0.7046332	0.8188083	1.0
REACTOME_GLUCOSE_TRANSPORT	-0.5381971	-1.6791488	0.032051284	0.81977624	0.9129999999999999
REACTOME_SPHINGOLIPID_DE_NOVO_BIOSYNTHESIS	0.38746533	0.9505458000000001	0.51497006	0.8203041	1.0
REACTOME_P2Y_RECEPTORS	-0.38643274	-0.79271007	0.6921529000000001	0.82204777	1.0
REACTOME_SYNTHESIS_OF_PE	-0.35671166	-0.79318243	0.7463312	0.82272744	1.0
BIOCARTA_GLEEVEC_PATHWAY	-0.30786379999999997	-0.79110074	0.7505029999999999	0.8230767	1.0
REACTOME_METABOLISM_OF_STEROID_HORMONES_AND_VITAMINS_A_AND_D	-0.28495845	-0.7932833	0.7450199000000001	0.8239531999999999	1.0
REACTOME_MEIOTIC_SYNAPSIS	0.35974473	0.9311736999999999	0.5445545	0.8240009	1.0
BIOCARTA_ATM_PATHWAY	-0.2778153	-0.7936751999999999	0.77911645	0.8246485999999998	1.0
REACTOME_CYTOSOLIC_SULFONATION_OF_SMALL_MOLECULES	-0.34128588	-0.7939401	0.71597636	0.8256101	1.0
BIOCARTA_KREB_PATHWAY	-0.36232109999999995	-0.7883609	0.725	0.8258575	1.0
REACTOME_CLEAVAGE_OF_GROWING_TRANSCRIPT_IN_THE_TERMINATION_REGION_	-0.25717342	-0.7946066999999999	0.6639839	0.8259350000000001	1.0
KEGG_BASE_EXCISION_REPAIR	-0.27474892	-0.78693616	0.6839917	0.82670534	1.0
REACTOME_ERK_MAPK_TARGETS	0.35302043	0.9157890999999999	0.5551102	0.82675236	1.0
KEGG_ARRHYTHMOGENIC_RIGHT_VENTRICULAR_CARDIOMYOPATHY_ARVC	0.25791374	0.9017360999999999	0.58181816	0.82732266	1.0
REACTOME_FORMATION_OF_ATP_BY_CHEMIOSMOTIC_COUPLING	0.3789459	0.91846365	0.55241936	0.8274536	1.0
REACTOME_NCAM1_INTERACTIONS	0.36190516	0.9259975	0.54720616	0.82810426	1.0
REACTOME_PHASE1_FUNCTIONALIZATION_OF_COMPOUNDS	0.3043508	0.8419146999999999	0.6934461	0.82848054	1.0
REACTOME_CIRCADIAN_CLOCK	0.2842381	0.9163039000000001	0.57831323	0.82873034	1.0
REACTOME_EFFECTS_OF_PIP2_HYDROLYSIS	0.3354729	0.9193948000000001	0.55060726	0.82886934	1.0
REACTOME_METAL_ION_SLC_TRANSPORTERS	0.38166493	0.84472674	0.65894735	0.82894	1.0
REACTOME_ADENYLATE_CYCLASE_ACTIVATING_PATHWAY	0.3684664	0.84303063	0.69857436	0.8291468000000001	1.0
KEGG_ARGININE_AND_PROLINE_METABOLISM	0.31074724	0.9205548000000001	0.60088694	0.82983404	1.0
REACTOME_RESOLUTION_OF_AP_SITES_VIA_THE_MULTIPLE_NUCLEOTIDE_PATCH_REPLACEMENT_PATHWAY	0.33648884	0.8304511999999998	0.686747	0.8299865	1.0
REACTOME_NEUROTRANSMITTER_RECEPTOR_BINDING_AND_DOWNSTREAM_TRANSMISSION_IN_THE_POSTSYNAPTIC_CELL	0.229987	0.92659384	0.5473251	0.83004284	1.0
BIOCARTA_ERYTH_PATHWAY	0.35289770000000004	0.9017847999999999	0.5748032	0.8302381	1.0
REACTOME_RNA_POL_II_TRANSCRIPTION_PRE_INITIATION_AND_PROMOTER_OPENING	0.26643825	0.8346631	0.667319	0.8305014000000001	1.0
BIOCARTA_NEUROTRANSMITTERS_PATHWAY	0.49464577	0.83612806	0.69762844	0.8306528000000001	1.0
REACTOME_ACTIVATION_OF_THE_AP1_FAMILY_OF_TRANSCRIPTION_FACTORS	0.38432828	0.8391912	0.66734695	0.8307187	1.0
BIOCARTA_NFAT_PATHWAY	-0.22546834	-0.7832368000000001	0.85902256	0.83089834	1.0
REACTOME_NEGATIVE_REGULATION_OF_FGFR_SIGNALING	0.24584557	0.8375148000000001	0.672447	0.83091855	1.0
REACTOME_CELL_DEATH_SIGNALLING_VIA_NRAGE_NRIF_AND_NADE	0.22267185	0.84494644	0.7029703	0.83117485	1.0
BIOCARTA_PTEN_PATHWAY	-0.28508073	-0.7819118	0.74902725	0.83150864	1.0
REACTOME_SIGNALING_BY_EGFR_IN_CANCER	0.22673737	0.92111087	0.5952849	0.8318558000000001	1.0
REACTOME_LYSOSOME_VESICLE_BIOGENESIS	0.32278258	0.9024285	0.55206287	0.83199555	1.0
BIOCARTA_AGPCR_PATHWAY	0.38980752	0.89771754	0.60612243	0.83206135	1.0
REACTOME_TCA_CYCLE_AND_RESPIRATORY_ELECTRON_TRANSPORT	0.28331932	0.9069763000000001	0.53688526	0.8321626	1.0
BIOCARTA_GPCR_PATHWAY	0.31214586	0.9039043999999999	0.57731956	0.83223206	1.0
REACTOME_FORMATION_OF_THE_HIV1_EARLY_ELONGATION_COMPLEX	0.31145132	0.83214074	0.6539235	0.8322421	1.0
REACTOME_MAP_KINASE_ACTIVATION_IN_TLR_CASCADE	0.25531697	0.8306599	0.727459	0.8322443000000002	1.0
REACTOME_RORA_ACTIVATES_CIRCADIAN_EXPRESSION	0.30339099999999997	0.82737076	0.72839504	0.8324866	1.0
REACTOME_ASSOCIATION_OF_LICENSING_FACTORS_WITH_THE_PRE_REPLICATIVE_COMPLEX	-0.74178654	-1.6093556	0.028571429	0.8328384	0.98
REACTOME_RNA_POL_I_RNA_POL_III_AND_MITOCHONDRIAL_TRANSCRIPTION	0.27071005	0.8455238000000002	0.62813103	0.8328440999999999	1.0
BIOCARTA_HSP27_PATHWAY	0.32663554	0.90485203	0.6074219	0.83343875	1.0
REACTOME_MRNA_CAPPING	0.3106565	0.85581917	0.622	0.8334855	1.0
REACTOME_SYNTHESIS_OF_VERY_LONG_CHAIN_FATTY_ACYL_COAS	0.3805732	0.8464875	0.7089844	0.8337324	1.0
REACTOME_HS_GAG_DEGRADATION	0.3508562	0.8480314	0.67436975	0.8337348	1.0
REACTOME_CYTOCHROME_P450_ARRANGED_BY_SUBSTRATE_TYPE	0.29637787	0.8722700000000001	0.65680474	0.8341915999999999	1.0
REACTOME_REGULATED_PROTEOLYSIS_OF_P75NTR	0.40984386	0.9103222	0.5694165	0.8345994000000001	1.0
KEGG_COMPLEMENT_AND_COAGULATION_CASCADES	0.3344851	0.8489184000000001	0.6701031	0.8347983	1.0
REACTOME_N_GLYCAN_ANTENNAE_ELONGATION_IN_THE_MEDIAL_TRANS_GOLGI	0.31320092	0.9071566999999999	0.5733333	0.83489245	1.0
REACTOME_PRE_NOTCH_TRANSCRIPTION_AND_TRANSLATION	0.31397974	0.92118585	0.5405405	0.8349011999999999	1.0
REACTOME_REGULATION_OF_INSULIN_LIKE_GROWTH_FACTOR_IGF_ACTIVITY_BY_INSULIN_LIKE_GROWTH_FACTOR_BINDING_PROTEINS_IGFBPS	0.40496573	0.85656625	0.64128256	0.834929	1.0
BIOCARTA_STRESS_PATHWAY	0.25948912	0.86395955	0.67436975	0.83551294	1.0
REACTOME_SIGNALING_BY_PDGF	0.26582137	0.8498667	0.722334	0.83584875	1.0
KEGG_TGF_BETA_SIGNALING_PATHWAY	0.27299646	0.8574796	0.6507276	0.83611125	1.0
KEGG_NUCLEOTIDE_EXCISION_REPAIR	0.30906337	0.9077004999999999	0.56346154	0.8369023000000001	1.0
REACTOME_GLOBAL_GENOMIC_NER_GG_NER	0.31335947	0.8723021000000001	0.6131528	0.8369931999999999	1.0
REACTOME_MEIOTIC_RECOMBINATION	0.32883474	0.8920007	0.5538462	0.837118	1.0
REACTOME_PROCESSING_OF_CAPPED_INTRONLESS_PRE_MRNA	-0.29640278	-0.7750418	0.70756644	0.8374615	1.0
BIOCARTA_VITCB_PATHWAY	0.41828007	0.87357616	0.64880955	0.8375189000000001	1.0
KEGG_THYROID_CANCER	0.28034362	0.8502674000000001	0.74	0.8378609	1.0
REACTOME_SIGNALING_BY_BMP	0.33805123	0.89314306	0.60751563	0.8379603000000001	1.0
REACTOME_DEADENYLATION_DEPENDENT_MRNA_DECAY	-0.25299156	-0.7737341999999999	0.7355371999999999	0.83798337	1.0
BIOCARTA_HCMV_PATHWAY	-0.30535185	-0.77566224	0.69582504	0.83801776	1.0
REACTOME_KERATAN_SULFATE_KERATIN_METABOLISM	0.34013703	0.8640918	0.63126254	0.8381105	1.0
REACTOME_NUCLEAR_RECEPTOR_TRANSCRIPTION_PATHWAY	0.5164582999999999	1.6143756999999999	0.016064256000000002	0.8381245	0.968
REACTOME_G_PROTEIN_BETA_GAMMA_SIGNALLING	0.25305793	0.8224315999999999	0.69979715	0.8381540000000001	1.0
REACTOME_IL_6_SIGNALING	0.38951779999999997	0.85784274	0.63125	0.83826196	1.0
BIOCARTA_GCR_PATHWAY	-0.3097588	-0.77631545	0.778	0.8383761999999999	1.0
BIOCARTA_CREB_PATHWAY	0.29087102	0.8204732	0.70987654	0.8388714	1.0
BIOCARTA_ERK_PATHWAY	0.25460103	0.8509947	0.670082	0.839356	1.0
BIOCARTA_EGFR_SMRTE_PATHWAY	0.36793790000000004	0.8648033000000002	0.62992126	0.8396318000000002	1.0
BIOCARTA_RACCYCD_PATHWAY	0.31904808	0.8739499	0.6397638000000001	0.83970267	1.0
BIOCARTA_NUCLEARRS_PATHWAY	0.33592424	0.8798081	0.6082474	0.84051746	1.0
REACTOME_ACTIVATION_OF_CHAPERONE_GENES_BY_XBP1S	0.27531883	0.8581156999999999	0.60042286	0.84056497	1.0
KEGG_PYRUVATE_METABOLISM	0.2851645	0.81620246	0.70689654	0.84095955	1.0
REACTOME_OLFACTORY_SIGNALING_PATHWAY	0.3152506	0.8593641	0.61507934	0.8411536000000001	1.0
KEGG_N_GLYCAN_BIOSYNTHESIS	0.29320365	0.8808753	0.618	0.8412210999999999	1.0
BIOCARTA_AKAPCENTROSOME_PATHWAY	0.36021364	0.86542195	0.6646091	0.8414155000000001	1.0
BIOCARTA_TOB1_PATHWAY	0.33949572	0.81722826	0.6693711999999999	0.8417899	1.0
BIOCARTA_CARM1_PATHWAY	0.631249	1.4684285	0.08695652	0.84220314	1.0
REACTOME_BASE_EXCISION_REPAIR	0.34606007	0.8818654	0.6141414000000001	0.84230554	1.0
REACTOME_G_ALPHA_Q_SIGNALLING_EVENTS	0.22379197	0.8740281999999999	0.6935484000000001	0.8425004999999999	1.0
REACTOME_SHC1_EVENTS_IN_ERBB4_SIGNALING	0.32099816	0.86628604	0.641129	0.84263104	1.0
REACTOME_METABOLISM_OF_PROTEINS	-0.17953746	-0.7670093000000001	0.8438735	0.84376687	1.0
BIOCARTA_SPRY_PATHWAY	-0.28424698	-0.76788884	0.74596775	0.84382415	1.0
REACTOME_BIOSYNTHESIS_OF_THE_N_GLYCAN_PRECURSOR_DOLICHOL_LIPID_LINKED_OLIGOSACCHARIDE_LLO_AND_TRANSFER_TO_A_NASCENT_PROTEIN	0.34082556	0.8870167	0.5925925999999999	0.84396124	1.0
KEGG_VALINE_LEUCINE_AND_ISOLEUCINE_BIOSYNTHESIS	0.3196097	0.88245696	0.5689655	0.84401166	1.0
REACTOME_INITIAL_TRIGGERING_OF_COMPLEMENT	-0.42655227	-0.76573986	0.75287354	0.84421766	1.0
REACTOME_FORMATION_OF_THE_TERNARY_COMPLEX_AND_SUBSEQUENTLY_THE_43S_COMPLEX	-0.23314518	-0.7685349	0.6764706	0.8442848	1.0
BIOCARTA_HDAC_PATHWAY	0.25720397	0.80783945	0.73511297	0.8444264000000001	1.0
REACTOME_G_ALPHA_Z_SIGNALLING_EVENTS	0.26613474	0.8745253000000001	0.6812749	0.84455705	1.0
REACTOME_KERATAN_SULFATE_BIOSYNTHESIS	0.33846128	0.8122769	0.7195121999999999	0.84484977	1.0
BIOCARTA_TFF_PATHWAY	0.2993161	0.80582184	0.7520161	0.8451173000000001	1.0
REACTOME_GLUCONEOGENESIS	0.29348347	0.80847174	0.72289157	0.8459177	1.0
BIOCARTA_BARR_MAPK_PATHWAY	0.32516405	0.8825328000000001	0.6023857	0.8468693000000002	1.0
REACTOME_FGFR_LIGAND_BINDING_AND_ACTIVATION	0.2921579	0.80932087	0.6978558000000001	0.84709746	1.0
REACTOME_ACTIVATION_OF_BH3_ONLY_PROTEINS	0.32429734	0.8028826	0.7106796	0.8472799000000001	1.0
KEGG_GLYCEROPHOSPHOLIPID_METABOLISM	0.22200692	0.8746138000000001	0.7089844	0.84737456	1.0
REACTOME_RNA_POL_III_TRANSCRIPTION_TERMINATION	-0.30390459999999997	-0.76240295	0.77431905	0.84765244	1.0
BIOCARTA_NTHI_PATHWAY	-0.2638134	-0.7603969	0.74423075	0.8477866	1.0
REACTOME_CS_DS_DEGRADATION	-0.35727835	-0.7610023	0.74358976	0.848276	1.0
BIOCARTA_CK1_PATHWAY	0.5727138	1.4729611999999999	0.06477733	0.84835094	1.0
REACTOME_PROSTANOID_LIGAND_RECEPTORS	0.39513797	0.8828453000000002	0.6192385	0.8493257	1.0
BIOCARTA_COMP_PATHWAY	-0.39242232	-0.75771326	0.7375479	0.8501556	1.0
REACTOME_SULFUR_AMINO_ACID_METABOLISM	0.3020743	0.79868674	0.7706611999999999	0.8514415000000001	1.0
BIOCARTA_41BB_PATHWAY	-0.24791728	-0.7533449999999999	0.8286290000000001	0.8522291999999999	1.0
BIOCARTA_CERAMIDE_PATHWAY	0.25425804	0.79478467	0.750996	0.8525738000000002	1.0
REACTOME_HYALURONAN_METABOLISM	-0.28223214	-0.75375617	0.79657793	0.85300654	1.0
REACTOME_MITOCHONDRIAL_TRNA_AMINOACYLATION	0.3123781	0.7960245	0.71206224	0.8531177	1.0
REACTOME_SEMA4D_INDUCED_CELL_MIGRATION_AND_GROWTH_CONE_COLLAPSE	-0.2763773	-0.7517621999999999	0.7903846	0.85316145	1.0
KEGG_TERPENOID_BACKBONE_BIOSYNTHESIS	-0.3431897	-0.7545001	0.7842741999999999	0.85340434	1.0
BIOCARTA_PITX2_PATHWAY	-0.27471167	-0.74672467	0.78277886	0.8560105	1.0
REACTOME_PROLACTIN_RECEPTOR_SIGNALING	0.6243249	1.5435748	0.050880626	0.85609007	0.998
BIOCARTA_TOLL_PATHWAY	-0.25932494	-0.74723744	0.7842004	0.85662526	1.0
REACTOME_RNA_POL_III_TRANSCRIPTION	-0.23890822	-0.7481977	0.7809331	0.85666925	1.0
BIOCARTA_RAS_PATHWAY	-0.24023968	-0.7430876000000001	0.8106509	0.85838026	1.0
KEGG_SPLICEOSOME	-0.22766103	-0.7439265	0.7068273	0.85864985	1.0
BIOCARTA_MCALPAIN_PATHWAY	-0.28424612	-0.7418545	0.8501946	0.85870415	1.0
REACTOME_INWARDLY_RECTIFYING_K_CHANNELS	0.25850457	0.7890401999999999	0.7444668000000001	0.85923856	1.0
REACTOME_ENOS_ACTIVATION_AND_REGULATION	-0.28123802	-0.73954314	0.85162604	0.8603857	1.0
BIOCARTA_TALL1_PATHWAY	-0.31168675	-0.737418	0.7971311	0.8618650999999999	1.0
REACTOME_IKK_COMPLEX_RECRUITMENT_MEDIATED_BY_RIP1	-0.36168635	-0.7344602	0.8011583000000001	0.86291087	1.0
BIOCARTA_EIF2_PATHWAY	-0.34006935	-0.73540103	0.77843136	0.8629363999999999	1.0
REACTOME_BOTULINUM_NEUROTOXICITY	0.5779785	1.5197159	0.029013538999999998	0.86357254	1.0
KEGG_MELANOMA	-0.20043069	-0.72895074	0.9306358	0.8647007999999999	1.0
REACTOME_AMYLOIDS	-0.2711678	-0.7268262	0.76938367	0.86471885	1.0
REACTOME_SYNTHESIS_SECRETION_AND_DEACYLATION_OF_GHRELIN	-0.35292903	-0.7277146	0.8674948	0.864984	1.0
BIOCARTA_EXTRINSIC_PATHWAY	-0.37495315	-0.72973615	0.8544061	0.86501354	1.0
REACTOME_DEPOSITION_OF_NEW_CENPA_CONTAINING_NUCLEOSOMES_AT_THE_CENTROMERE	-0.31104988	-0.72993475	0.75102884	0.8661324	1.0
REACTOME_SYNTHESIS_SECRETION_AND_INACTIVATION_OF_GIP	-0.3211177	-0.73059005	0.82703775	0.8665881999999999	1.0
REACTOME_TRANSMISSION_ACROSS_CHEMICAL_SYNAPSES	0.3904641	1.5056876000000001	0.02811245	0.86661696	1.0
REACTOME_PECAM1_INTERACTIONS	-0.8551716999999999	-1.684535	0.001972387	0.8681076999999999	0.9
REACTOME_ASPARAGINE_N_LINKED_GLYCOSYLATION	0.24173167	0.7791326999999999	0.7576375	0.86917096	1.0
REACTOME_GRB2_EVENTS_IN_ERBB2_SIGNALING	0.28550506	0.7731899999999999	0.7996109	0.8705588	1.0
BIOCARTA_SALMONELLA_PATHWAY	-0.69583374	-1.6111665000000002	0.02020202	0.8709565999999999	0.98
REACTOME_REGULATION_OF_BETA_CELL_DEVELOPMENT	0.26557028	0.7744894	0.75342464	0.87111676	1.0
REACTOME_DNA_REPAIR	0.23256041	0.7793249	0.7090559000000001	0.87150174	1.0
REACTOME_TRIGLYCERIDE_BIOSYNTHESIS	0.27957043	0.7745354999999999	0.84136546	0.87360644	1.0
KEGG_TAURINE_AND_HYPOTAURINE_METABOLISM	0.78233117	1.5254151000000002	0.02972399	0.8741191999999999	1.0
REACTOME_GABA_SYNTHESIS_RELEASE_REUPTAKE_AND_DEGRADATION	0.77318215	1.5580428999999998	0.003891051	0.8741684000000001	0.996
REACTOME_DESTABILIZATION_OF_MRNA_BY_TRISTETRAPROLIN_TTP	0.27331454	0.7684224000000001	0.77484787	0.8750435999999999	1.0
BIOCARTA_NDKDYNAMIN_PATHWAY	0.27557316	0.7662736	0.7967807	0.87546295	1.0
BIOCARTA_AT1R_PATHWAY	0.24565448	0.7633868	0.8320000000000001	0.8772025	1.0
REACTOME_RNA_POL_I_PROMOTER_OPENING	0.34823093	0.76092976	0.6992031999999999	0.8782545	1.0
REACTOME_CREB_PHOSPHORYLATION_THROUGH_THE_ACTIVATION_OF_CAMKII	0.6050078000000001	1.473184	0.0655106	0.87990755	1.0
REACTOME_FATTY_ACYL_COA_BIOSYNTHESIS	0.32915166	0.75762844	0.8502994	0.8806519	1.0
REACTOME_HEPARAN_SULFATE_HEPARIN_HS_GAG_METABOLISM	0.25591820000000004	0.74356776	0.8248472	0.8825549000000001	1.0
KEGG_GLYCOSYLPHOSPHATIDYLINOSITOL_GPI_ANCHOR_BIOSYNTHESIS	0.659563	1.6711563999999999	0.012170386000000002	0.88292915	0.885
KEGG_CITRATE_CYCLE_TCA_CYCLE	0.26486656	0.7440365	0.7671518	0.8843923	1.0
REACTOME_NUCLEOTIDE_EXCISION_REPAIR	0.2493576	0.75310755	0.7485265	0.88457155	1.0
REACTOME_ROLE_OF_DCC_IN_REGULATING_APOPTOSIS	0.29959354	0.740074	0.8043912	0.884848	1.0
REACTOME_NOTCH_HLH_TRANSCRIPTION_PATHWAY	-0.25648043	-0.706622	0.82077396	0.88561827	1.0
BIOCARTA_LECTIN_PATHWAY	0.3388323	0.73732924	0.7755102	0.88618875	1.0
KEGG_ECM_RECEPTOR_INTERACTION	0.2863377	0.7443093000000001	0.7627811999999999	0.8865078000000002	1.0
BIOCARTA_BARRESTIN_SRC_PATHWAY	-0.25203198	-0.70696795	0.82696176	0.8865408000000001	1.0
REACTOME_ACETYLCHOLINE_BINDING_AND_DOWNSTREAM_EVENTS	-0.29028517	-0.70762265	0.7886179	0.8871411	1.0
REACTOME_CLASS_B_2_SECRETIN_FAMILY_RECEPTORS	0.21265122	0.73418355	0.9004065	0.8877953000000002	1.0
REACTOME_CTNNB1_PHOSPHORYLATION_CASCADE	0.55887824	1.5087618	0.07554672	0.88893735	1.0
KEGG_REGULATION_OF_AUTOPHAGY	0.20948511	0.7443557	0.77559054	0.88896453	1.0
REACTOME_GAB1_SIGNALOSOME	0.22516327	0.747694	0.87673956	0.88948846	1.0
KEGG_FOCAL_ADHESION	0.23089992	0.7458084	0.7905544	0.8895011999999999	1.0
REACTOME_COMPLEMENT_CASCADE	0.32469946	0.72098213	0.78914404	0.8904656999999999	1.0
REACTOME_FORMATION_OF_RNA_POL_II_ELONGATION_COMPLEX_	0.25370595	0.7246689000000001	0.7879999999999999	0.8905019000000001	1.0
BIOCARTA_IGF1MTOR_PATHWAY	0.28236690000000003	0.7188224	0.8712274	0.89077246	1.0
REACTOME_APOPTOSIS_INDUCED_DNA_FRAGMENTATION	-0.2882827	-0.70111233	0.8557114	0.8908908999999999	1.0
REACTOME_A_TETRASACCHARIDE_LINKER_SEQUENCE_IS_REQUIRED_FOR_GAG_SYNTHESIS	0.32668412	0.7222215999999999	0.8343815999999998	0.89129275	1.0
REACTOME_TRANSLATION	0.18731101	0.7257939	0.7155172	0.8915337	1.0
BIOCARTA_MTOR_PATHWAY	0.27232724	0.7295847	0.81620556	0.8915859	1.0
REACTOME_LIPID_DIGESTION_MOBILIZATION_AND_TRANSPORT	0.25967237	0.7133662	0.8574468000000001	0.892483	1.0
REACTOME_INSULIN_RECEPTOR_RECYCLING	0.27623257	0.7149221	0.8125	0.89301157	1.0
REACTOME_CREB_PHOSPHORYLATION_THROUGH_THE_ACTIVATION_OF_RAS	-0.21659851	-0.6967918000000001	0.874502	0.89308685	1.0
REACTOME_ELEVATION_OF_CYTOSOLIC_CA2_LEVELS	0.31742442	0.7262793000000001	0.7829615	0.8933502000000001	1.0
REACTOME_SHC_MEDIATED_CASCADE	-0.21593167	-0.6972888	0.91217566	0.8938617	1.0
KEGG_CIRCADIAN_RHYTHM_MAMMAL	0.65884495	1.476605	0.07350097	0.89449936	1.0
KEGG_VALINE_LEUCINE_AND_ISOLEUCINE_DEGRADATION	0.5994116999999999	1.4826244	0.06790123	0.8947149999999999	1.0
REACTOME_ROLE_OF_SECOND_MESSENGERS_IN_NETRIN1_SIGNALING	-0.27805036	-0.6929472	0.7762646	0.89480525	1.0
KEGG_GLYOXYLATE_AND_DICARBOXYLATE_METABOLISM	-0.24484381	-0.69339067	0.86625516	0.8956450999999999	1.0
REACTOME_INTRINSIC_PATHWAY	-0.26327306	-0.6891871	0.8538011999999999	0.89750385	1.0
REACTOME_ACTIVATION_OF_KAINATE_RECEPTORS_UPON_GLUTAMATE_BINDING	-0.21057315	-0.6879909000000001	0.8964844000000001	0.89757615	1.0
REACTOME_ABORTIVE_ELONGATION_OF_HIV1_TRANSCRIPT_IN_THE_ABSENCE_OF_TAT	-0.26359195	-0.6863128000000001	0.8031496	0.89809805	1.0
REACTOME_BMAL1_CLOCK_NPAS2_ACTIVATES_CIRCADIAN_EXPRESSION	0.24345815	0.70579344	0.9215291999999999	0.8993370999999999	1.0
KEGG_TYPE_II_DIABETES_MELLITUS	0.46940833	1.5455524	0.021400778	0.9000673	0.998
REACTOME_HDL_MEDIATED_LIPID_TRANSPORT	-0.2734769	-0.6794811	0.8624030999999999	0.9040865	1.0
REACTOME_HOMOLOGOUS_RECOMBINATION_REPAIR_OF_REPLICATION_INDEPENDENT_DOUBLE_STRAND_BREAKS	0.24507189	0.6925585999999999	0.8187134	0.9122135	1.0
REACTOME_CITRIC_ACID_CYCLE_TCA_CYCLE	0.27656168	0.6706877	0.84136546	0.9139575000000001	1.0
BIOCARTA_FIBRINOLYSIS_PATHWAY	0.36526647	0.6723924	0.91820043	0.91461545	1.0
REACTOME_IMMUNOREGULATORY_INTERACTIONS_BETWEEN_A_LYMPHOID_AND_A_NON_LYMPHOID_CELL	-0.6924796	-1.6287661	0.037328094	0.91482776	0.973
BIOCARTA_CARM_ER_PATHWAY	0.5090532	1.6177118000000001	0.010060363000000001	0.91491663	0.963
REACTOME_SOS_MEDIATED_SIGNALLING	0.28805998	0.68771535	0.8956693000000001	0.9152839	1.0
REACTOME_ACTIVATION_OF_THE_PRE_REPLICATIVE_COMPLEX	-0.77297115	-1.6129965	0.008438818	0.9154888000000001	0.978
BIOCARTA_CD40_PATHWAY	0.24917872	0.67590964	0.8353908999999999	0.9157805	1.0
REACTOME_PLATELET_CALCIUM_HOMEOSTASIS	0.24445589	0.6733210999999999	0.81526107	0.9160492	1.0
REACTOME_REGULATION_OF_COMPLEMENT_CASCADE	0.35727265	0.68122524	0.84468085	0.9175708	1.0
BIOCARTA_INTRINSIC_PATHWAY	0.29807305	0.6833804	0.9087136999999998	0.917715	1.0
KEGG_GLYCOSAMINOGLYCAN_BIOSYNTHESIS_KERATAN_SULFATE	0.29436472	0.6759533000000001	0.9123505999999999	0.91820145	1.0
BIOCARTA_CARDIACEGF_PATHWAY	0.3033759	0.6780042	0.93861383	0.91841865	1.0
REACTOME_DIGESTION_OF_DIETARY_CARBOHYDRATE	0.39817533	0.66312754	0.8531745999999999	0.9188492	1.0
BIOCARTA_CFTR_PATHWAY	0.7159616999999999	1.5262275	0.031936128	0.9196738999999999	1.0
REACTOME_UNBLOCKING_OF_NMDA_RECEPTOR_GLUTAMATE_BINDING_AND_ACTIVATION	0.71357095	1.5908262	0.011952192	0.9227871	0.982
REACTOME_POST_TRANSLATIONAL_MODIFICATION_SYNTHESIS_OF_GPI_ANCHORED_PROTEINS	0.57291365	1.4901948999999999	0.04536082599999999	0.92346096	1.0
REACTOME_TELOMERE_MAINTENANCE	-0.25152588	-0.6570234	0.82194614	0.9253758	1.0
BIOCARTA_STEM_PATHWAY	-0.66052914	-1.6359762	0.025742574	0.9280806999999999	0.9670000000000001
REACTOME_INHIBITION_OF_REPLICATION_INITIATION_OF_DAMAGED_DNA_BY_RB1_E2F1	0.26060674	0.6436026999999999	0.88594705	0.92929596	1.0
REACTOME_NEGATIVE_REGULATION_OF_THE_PI3K_AKT_NETWORK	-0.295028	-0.6482956999999999	0.9171843000000001	0.9293383	1.0
BIOCARTA_NO1_PATHWAY	0.21571669	0.63996273	0.9364754000000001	0.9300719999999999	1.0
REACTOME_G_PROTEIN_ACTIVATION	-0.20854744	-0.6485572	0.9221556999999999	0.9305286	1.0
REACTOME_ACTIVATION_OF_THE_MRNA_UPON_BINDING_OF_THE_CAP_BINDING_COMPLEX_AND_EIFS_AND_SUBSEQUENT_BINDING_TO_43S	-0.18833640000000001	-0.6498959	0.8323699000000001	0.9306488000000002	1.0
REACTOME_RNA_POL_II_TRANSCRIPTION	-0.18602206	-0.63835293	0.90163934	0.93119216	1.0
REACTOME_TRANSCRIPTIONAL_REGULATION_OF_WHITE_ADIPOCYTE_DIFFERENTIATION	0.23353225	0.64390206	0.93459916	0.93150973	1.0
REACTOME_DOUBLE_STRAND_BREAK_REPAIR	-0.2184895	-0.6436724	0.84842104	0.9323068000000001	1.0
REACTOME_SIGNALING_BY_ACTIVATED_POINT_MUTANTS_OF_FGFR1	-0.2556658	-0.63863385	0.875	0.9323696	1.0
REACTOME_ADP_SIGNALLING_THROUGH_P2RY12	-0.23543833	-0.6352251	0.91071427	0.93254715	1.0
BIOCARTA_GATA3_PATHWAY	0.74624896	1.6877756999999998	0.002004008	0.93272716	0.848
REACTOME_FORMATION_OF_INCISION_COMPLEX_IN_GG_NER	0.5897505999999999	1.4827628000000002	0.054766733	0.93282545	1.0
REACTOME_PEROXISOMAL_LIPID_METABOLISM	0.6983808000000001	1.5591796999999998	0.02258727	0.9328526	0.996
BIOCARTA_CACAM_PATHWAY	0.26302233	0.64506704	0.8483685	0.9329385	1.0
BIOCARTA_FREE_PATHWAY	-0.264272	-0.63881916	0.8859999999999999	0.93362737	1.0
REACTOME_MRNA_3_END_PROCESSING	-0.21470536	-0.6400349	0.8371134	0.933984	1.0
REACTOME_ACTIVATED_TAK1_MEDIATES_P38_MAPK_ACTIVATION	-0.57138264	-1.6443067	0.039915967999999996	0.937557	0.956
KEGG_MATURITY_ONSET_DIABETES_OF_THE_YOUNG	-0.21857697	-0.6271793000000001	0.90818363	0.93786794	1.0
REACTOME_DESTABILIZATION_OF_MRNA_BY_BRF1	0.21807158	0.62503743	0.93503934	0.93974394	1.0
REACTOME_VIRAL_MESSENGER_RNA_SYNTHESIS	-0.24776356	-0.62053835	0.8888889000000001	0.94164467	1.0
REACTOME_OTHER_SEMAPHORIN_INTERACTIONS	-0.23798297	-0.61463493	0.8833992	0.944838	1.0
REACTOME_RECYCLING_OF_BILE_ACIDS_AND_SALTS	-0.25980458	-0.60241926	0.91698843	0.95232344	1.0
REACTOME_PRE_NOTCH_PROCESSING_IN_GOLGI	-0.22843142	-0.5964845999999999	0.8971428	0.95339257	1.0
BIOCARTA_RELA_PATHWAY	-0.21141987	-0.59816235	0.9301396999999999	0.9537088	1.0
KEGG_PEROXISOME	0.5133415	1.5754418	0.022494887999999998	0.9614722	0.9890000000000001
REACTOME_SYNTHESIS_OF_PIPS_AT_THE_LATE_ENDOSOME_MEMBRANE	0.24561357	0.5864026999999999	0.9175476	0.96399146	1.0
REACTOME_N_GLYCAN_TRIMMING_IN_THE_ER_AND_CALNEXIN_CALRETICULIN_CYCLE	-0.2587904	-0.5724265000000001	0.89514565	0.966628	1.0
REACTOME_TRANSCRIPTION	-0.15687979999999999	-0.5648631	0.9773196	0.96785545	1.0
REACTOME_TANDEM_PORE_DOMAIN_POTASSIUM_CHANNELS	-0.29945320000000003	-0.5675153000000001	0.9582504999999999	0.96786076	1.0
REACTOME_RNA_POL_II_PRE_TRANSCRIPTION_EVENTS	0.176421	0.5668486999999999	0.95049506	0.96981996	1.0
REACTOME_RAP1_SIGNALLING	0.21466325	0.55512524	0.97604793	0.9706128	1.0
BIOCARTA_EIF_PATHWAY	0.24150667	0.5700411999999999	0.8976378	0.9706875	1.0
REACTOME_RETROGRADE_NEUROTROPHIN_SIGNALLING	0.21432246	0.5564089	0.95247525	0.97250056	1.0
REACTOME_ELONGATION_ARREST_AND_RECOVERY	-0.19108136	-0.5477399000000001	0.9437751	0.9735002	1.0
REACTOME_CTLA4_INHIBITORY_SIGNALING	-0.5865016	-1.6136491000000002	0.026262626	0.9739581	0.978
REACTOME_CALNEXIN_CALRETICULIN_CYCLE	-0.25575042	-0.5492760999999999	0.9302326	0.97425646	1.0
REACTOME_MICRORNA_MIRNA_BIOGENESIS	0.20665383	0.5350486999999999	0.9522863000000001	0.97662926	1.0
REACTOME_ACTIVATED_POINT_MUTANTS_OF_FGFR2	-0.19835198	-0.51945215	0.958498	0.9793886999999999	1.0
BIOCARTA_EPO_PATHWAY	-0.18091258	-0.5208228	0.9858870999999999	0.98029363	1.0
REACTOME_DSCAM_INTERACTIONS	-0.22401866	-0.5241428	0.95614034	0.9804809000000001	1.0
REACTOME_CIRCADIAN_REPRESSION_OF_EXPRESSION_BY_REV_ERBA	-0.18570381	-0.52455044	0.975	0.9817921999999999	1.0
REACTOME_SIGNALING_BY_NODAL	0.17573224	0.50866723	0.9902344000000001	0.98321563	1.0
REACTOME_REGULATORY_RNA_PATHWAYS	0.18407461	0.49852148	0.96837944	0.9836440999999999	1.0
BIOCARTA_P53HYPOXIA_PATHWAY	0.17848152	0.48566496	0.99590164	0.9844825	1.0
REACTOME_NEUROTRANSMITTER_RELEASE_CYCLE	0.70869195	1.7465574000000001	0.0	0.9880766	0.68
REACTOME_SPRY_REGULATION_OF_FGF_SIGNALING	-0.17529398	-0.48481664	0.98651254	0.9884494	1.0
KEGG_RIBOSOME	0.47092018	1.5617381000000001	0.13426854	0.9889153	0.996
BIOCARTA_TH1TH2_PATHWAY	-0.707195	-1.6846043000000002	0.011741683000000001	0.9913075000000001	0.9
BIOCARTA_ETC_PATHWAY	-0.178264	-0.44523263	0.986	0.9934056	1.0
REACTOME_PROCESSING_OF_INTRONLESS_PRE_MRNAS	-0.18193065	-0.4492602	0.9919517	0.99424267	1.0
REACTOME_FGFR2C_LIGAND_BINDING_AND_ACTIVATION	-0.16025744	-0.41421499999999994	0.9885056999999999	0.9955917999999999	1.0
BIOCARTA_G2_PATHWAY	-0.7049354	-1.7042273999999997	0.00625	1.0	0.852
REACTOME_PASSIVE_TRANSPORT_BY_AQUAPORINS	-0.7568158	-1.7179346000000002	0.001865672	1.0	0.81
KEGG_DORSO_VENTRAL_AXIS_FORMATION	-0.5675508	-1.7201697	0.013409962	1.0	0.8029999999999999
REACTOME_PYRIMIDINE_METABOLISM	-0.7024170999999999	-1.7258735	0.001964637	1.0	0.7879999999999999
BIOCARTA_ACTINY_PATHWAY	-0.73407495	-1.7493968	0.001945525	1.0	0.7190000000000001
REACTOME_SYNTHESIS_OF_GLYCOSYLPHOSPHATIDYLINOSITOL_GPI	0.7028079	1.6988696	0.001976285	1.0	0.8240000000000001
REACTOME_ENDOGENOUS_STEROLS	-0.7615894	-1.6942371999999999	0.005703422	1.0	0.878
REACTOME_GLYCOSPHINGOLIPID_METABOLISM	0.5897312	1.7630588	0.006048387	1.0	0.632
