# Supplementary material for: A Systematic Framework for Drug Repositioning from Integrated Omics and Drug Phenotype Profiles Using Pathway-Drug Network
Source: Biomed Res Int. 2016 Dec 26;2016:7147039. doi: 10.1155/2016/7147039 (PMC5233404; doi:10.1155/2016/7147039)
Supplement: Supplementary file 5 [file 7147039.f5.txt]

# ES : Enrichment Score
# NES : Normalized Enrichment Score
# NOM pvalue : Nominal p-value
# FDR : False Discovery Rate
# FWER : Familywise-error Rate
# For detail explanation of each scores refer to http://software.broadinstitute.org/gsea/doc/GSEAUserGuideFrame.html
NAME	ES	NES	NOM p-val	FDR q-val	FWER p-val
REACTOME_M_G1_TRANSITION	-0.67078906	-1.5721736000000002	0.026915114	0.3383311	0.985
REACTOME_DNA_STRAND_ELONGATION	-0.8114125	-1.5740618	0.011904762	0.34198928	0.9840000000000001
REACTOME_METABOLISM_OF_NUCLEOTIDES	-0.56086826	-1.5758563	0.030864198	0.34581402	0.9840000000000001
REACTOME_ASSOCIATION_OF_LICENSING_FACTORS_WITH_THE_PRE_REPLICATIVE_COMPLEX	-0.7370677	-1.5241323999999998	0.027667984	0.34722945	0.996
KEGG_OOCYTE_MEIOSIS	-0.48446548	-1.5263393	0.025	0.3475233	0.996
KEGG_CELL_CYCLE	-0.59837025	-1.5538979	0.03	0.34908342	0.991
REACTOME_TETRAHYDROBIOPTERIN_BH4_SYNTHESIS_RECYCLING_SALVAGE_AND_REGULATION	-0.68210536	-1.5347796999999999	0.03206413	0.3495972	0.993
REACTOME_FORMATION_OF_TUBULIN_FOLDING_INTERMEDIATES_BY_CCT_TRIC	-0.61371267	-1.5325079	0.064257026	0.34977072	0.9940000000000001
REACTOME_REPAIR_SYNTHESIS_FOR_GAP_FILLING_BY_DNA_POL_IN_TC_NER	-0.76183957	-1.5277223999999998	0.0390625	0.35013249999999996	0.995
REACTOME_G1_S_SPECIFIC_TRANSCRIPTION	-0.86840904	-1.5559676000000002	0.0	0.3515618	0.99
KEGG_MISMATCH_REPAIR	-0.72790676	-1.5615338	0.021526418999999998	0.35178754	0.99
REACTOME_DEPOSITION_OF_NEW_CENPA_CONTAINING_NUCLEOSOMES_AT_THE_CENTROMERE	-0.69371283	-1.5365598	0.042596348	0.35198870000000004	0.993
BIOCARTA_AKAP95_PATHWAY	-0.80110705	-1.5197046	0.016981132	0.35270664	0.996
REACTOME_REMOVAL_OF_THE_FLAP_INTERMEDIATE_FROM_THE_C_STRAND	-0.74929076	-1.5387753	0.039215688	0.35286552	0.993
REACTOME_RNA_POL_I_TRANSCRIPTION	-0.5929383	-1.5766461	0.03968254	0.35287470000000004	0.983
REACTOME_ORC1_REMOVAL_FROM_CHROMATIN	-0.6490098000000001	-1.5638033000000002	0.03869654	0.35357583	0.988
REACTOME_G2_M_CHECKPOINTS	-0.77132857	-1.5492788999999998	0.02385686	0.35490197	0.992
REACTOME_ACTIVATION_OF_ATR_IN_RESPONSE_TO_REPLICATION_STRESS	-0.76524514	-1.5574367	0.02366864	0.35535890000000003	0.99
BIOCARTA_ATRBRCA_PATHWAY	-0.580676	-1.5280402	0.071570575	0.35575855	0.995
REACTOME_CELL_CYCLE_CHECKPOINTS	-0.6719043	-1.5453736999999999	0.030487806	0.35751718	0.993
REACTOME_MEIOSIS	-0.51919204	-1.5394048999999999	0.06138614	0.35861167	0.993
REACTOME_GLYCOLYSIS	-0.5611689000000001	-1.5780383	0.036511157	0.35957775	0.983
REACTOME_SIGNALLING_TO_RAS	-0.5147965999999999	-1.5417764999999999	0.048543688	0.35968173	0.993
REACTOME_MRNA_DECAY_BY_5_TO_3_EXORIBONUCLEASE	-0.65332115	-1.578373	0.04255319	0.3692672	0.983
BIOCARTA_GLYCOLYSIS_PATHWAY	-0.7072835	-1.5963666	0.03006012	0.36985672	0.977
REACTOME_TANDEM_PORE_DOMAIN_POTASSIUM_CHANNELS	-0.82520974	-1.51071	0.017013233	0.37122384	0.996
REACTOME_ASSEMBLY_OF_THE_PRE_REPLICATIVE_COMPLEX	-0.64641404	-1.5019938	0.065979384	0.37696442	0.997
REACTOME_CYCLIN_E_ASSOCIATED_EVENTS_DURING_G1_S_TRANSITION_	-0.60880136	-1.4976254999999998	0.08282828	0.37727755	0.997
BIOCARTA_G2_PATHWAY	-0.6491840999999999	-1.5790725	0.037475344	0.3777689	0.983
REACTOME_FRS2_MEDIATED_CASCADE	-0.46336776	-1.5062598	0.037549406	0.37789455	0.996
REACTOME_MEIOTIC_RECOMBINATION	-0.5953466	-1.5970076000000002	0.039138942999999995	0.38075024	0.977
REACTOME_MEIOTIC_SYNAPSIS	-0.5896769000000001	-1.4983786000000001	0.071570575	0.38135403	0.997
REACTOME_PROCESSING_OF_INTRONLESS_PRE_MRNAS	-0.57470256	-1.5025796999999999	0.06286837	0.3815663	0.996
REACTOME_LOSS_OF_NLP_FROM_MITOTIC_CENTROSOMES	-0.4607736	-1.5808401	0.029354207	0.38424957	0.983
KEGG_PYRIMIDINE_METABOLISM	-0.50913006	-1.5843271	0.027722772000000003	0.38499877	0.982
REACTOME_RNA_POL_I_RNA_POL_III_AND_MITOCHONDRIAL_TRANSCRIPTION	-0.50230557	-1.4910954	0.076620825	0.3891692	0.9990000000000001
BIOCARTA_MCM_PATHWAY	-0.8101473000000001	-1.5981798	0.01183432	0.39105809999999996	0.976
REACTOME_RAF_MAP_KINASE_CASCADE	-0.68065965	-1.4809881	0.045725647	0.39317265	0.9990000000000001
REACTOME_P38MAPK_EVENTS	-0.5641474	-1.4668204	0.07293666	0.3935087	0.9990000000000001
REACTOME_RECRUITMENT_OF_MITOTIC_CENTROSOME_PROTEINS_AND_COMPLEXES	-0.4475345	-1.4785111000000002	0.056640625	0.394714	0.9990000000000001
REACTOME_PACKAGING_OF_TELOMERE_ENDS	-0.704464	-1.4823316	0.06496063	0.39518735	0.9990000000000001
REACTOME_E2F_ENABLED_INHIBITION_OF_PRE_REPLICATION_COMPLEX_FORMATION	-0.82788986	-1.473644	0.023809524	0.39648449999999996	0.9990000000000001
BIOCARTA_RB_PATHWAY	-0.65649277	-1.4756302	0.06653619999999999	0.39663488	0.9990000000000001
REACTOME_POL_SWITCHING	-0.8259588	-1.5846281999999998	0.007751938000000001	0.39674988	0.981
REACTOME_G0_AND_EARLY_G1	-0.72834724	-1.4673428999999998	0.06324111	0.39739558	0.9990000000000001
BIOCARTA_PTC1_PATHWAY	-0.7367449	-1.470715	0.038	0.39897484	0.9990000000000001
BIOCARTA_CELLCYCLE_PATHWAY	-0.6156235999999999	-1.4854838	0.059760957999999996	0.39899492	0.9990000000000001
REACTOME_CYCLIN_A_B1_ASSOCIATED_EVENTS_DURING_G2_M_TRANSITION	-0.77324975	-1.482586	0.034	0.40046012	0.9990000000000001
REACTOME_SIGNALLING_TO_P38_VIA_RIT_AND_RIN	-0.61155254	-1.467606	0.06748466	0.40202558	0.9990000000000001
REACTOME_MITOTIC_G1_G1_S_PHASES	-0.6493526999999999	-1.5989977	0.024640657000000003	0.40334734	0.976
REACTOME_TRANSCRIPTION	-0.43082526	-1.4543218999999998	0.09881423	0.4067443	0.9990000000000001
REACTOME_SCFSKP2_MEDIATED_DEGRADATION_OF_P27_P21	-0.61961466	-1.4557797	0.10677618	0.40770277	0.9990000000000001
REACTOME_CYTOSOLIC_TRNA_AMINOACYLATION	-0.56769794	-1.4468154	0.13995942	0.41177362	0.9990000000000001
BIOCARTA_RANMS_PATHWAY	-0.7853302	-1.4560178999999998	0.03952569	0.412343	0.9990000000000001
REACTOME_CLEAVAGE_OF_GROWING_TRANSCRIPT_IN_THE_TERMINATION_REGION_	-0.48381525	-1.4578258999999998	0.0990099	0.41293859999999993	0.9990000000000001
REACTOME_ASSOCIATION_OF_TRIC_CCT_WITH_TARGET_PROTEINS_DURING_BIOSYNTHESIS	-0.46541953	-1.4478871000000002	0.07602339	0.41404759999999996	0.9990000000000001
REACTOME_AMINO_ACID_TRANSPORT_ACROSS_THE_PLASMA_MEMBRANE	-0.53028554	-1.4391853000000001	0.052208837	0.41692916	0.9990000000000001
REACTOME_MITOTIC_PROMETAPHASE	-0.6730894000000001	-1.6040331	0.02020202	0.41701192	0.971
REACTOME_CDC6_ASSOCIATION_WITH_THE_ORC_ORIGIN_COMPLEX	-0.7213702	-1.4427527	0.068897635	0.41719618	0.9990000000000001
REACTOME_INTERACTIONS_OF_VPR_WITH_HOST_CELLULAR_PROTEINS	-0.52846295	-1.4408149	0.11637081	0.41745344	0.9990000000000001
REACTOME_P53_DEPENDENT_G1_DNA_DAMAGE_RESPONSE	-0.59894526	-1.4480155000000001	0.11850311599999999	0.41883853	0.9990000000000001
REACTOME_LAGGING_STRAND_SYNTHESIS	-0.7859364000000001	-1.5991503999999999	0.0040322579999999995	0.41891116	0.976
REACTOME_RNA_POL_I_PROMOTER_OPENING	-0.64252883	-1.4363568000000002	0.106299214	0.41985485	0.9990000000000001
REACTOME_KINESINS	-0.85602224	-1.6063911	0.00390625	0.42605299999999996	0.97
REACTOME_AMINO_ACID_AND_OLIGOPEPTIDE_SLC_TRANSPORTERS	-0.48682250000000005	-1.423354	0.05042017	0.42969120000000005	1.0
REACTOME_E2F_MEDIATED_REGULATION_OF_DNA_REPLICATION	-0.7809215	-1.6201290000000002	0.004016064000000001	0.4314513	0.965
REACTOME_CDT1_ASSOCIATION_WITH_THE_CDC6_ORC_ORIGIN_COMPLEX	-0.6066996	-1.4237669	0.13939394	0.43328747	1.0
REACTOME_SLBP_DEPENDENT_PROCESSING_OF_REPLICATION_DEPENDENT_HISTONE_PRE_MRNAS	-0.812653	-1.6087432	0.014373717	0.43690159999999995	0.9690000000000001
REACTOME_MICRORNA_MIRNA_BIOGENESIS	-0.5837057	-1.4240768	0.12248996	0.4371933	1.0
REACTOME_SYNTHESIS_OF_DNA	-0.69043344	-1.6128001	0.01446281	0.44028446	0.968
REACTOME_APC_CDC20_MEDIATED_DEGRADATION_OF_NEK2A	-0.73311234	-1.4248226000000002	0.08151093	0.44038087	1.0
REACTOME_REGULATION_OF_MITOTIC_CELL_CYCLE	-0.62601024	-1.4250562	0.10927835	0.44480303	1.0
REACTOME_UNWINDING_OF_DNA	-0.8840286	-1.4155533000000002	0.03777336	0.44534284	1.0
REACTOME_GLOBAL_GENOMIC_NER_GG_NER	-0.5499378	-1.4129323	0.10700389	0.44739482	1.0
REACTOME_ACTIVATION_OF_THE_PRE_REPLICATIVE_COMPLEX	-0.78843	-1.6206672	0.009881423	0.45211333	0.965
BIOCARTA_HSP27_PATHWAY	-0.514625	-1.4010905	0.08997955	0.45983002	1.0
REACTOME_TRANSCRIPTION_COUPLED_NER_TC_NER	-0.5292738	-1.4044533000000001	0.1124498	0.46045718	1.0
REACTOME_APC_C_CDC20_MEDIATED_DEGRADATION_OF_CYCLIN_B	-0.723635	-1.4053712999999999	0.08979592	0.46296778	1.0
KEGG_NUCLEOTIDE_EXCISION_REPAIR	-0.5177946	-1.4011577	0.1183432	0.46439424	1.0
REACTOME_CDK_MEDIATED_PHOSPHORYLATION_AND_REMOVAL_OF_CDC6	-0.5942126999999999	-1.3934913	0.17575757	0.46541179999999993	1.0
REACTOME_RESOLUTION_OF_AP_SITES_VIA_THE_MULTIPLE_NUCLEOTIDE_PATCH_REPLACEMENT_PATHWAY	-0.5808751	-1.3962456	0.12820514	0.46763852	1.0
REACTOME_AMYLOIDS	-0.5047505999999999	-1.3943896999999998	0.12745099	0.46784624	1.0
REACTOME_SIGNALLING_TO_ERKS	-0.43249	-1.3900479	0.13035019	0.4705232	1.0
KEGG_GLYOXYLATE_AND_DICARBOXYLATE_METABOLISM	-0.51455045	-1.3874388	0.106796116	0.47317773	1.0
REACTOME_FACTORS_INVOLVED_IN_MEGAKARYOCYTE_DEVELOPMENT_AND_PLATELET_PRODUCTION	-0.45958420000000005	-1.6627802	0.003773585	0.47506896	0.9229999999999999
REACTOME_EXTENSION_OF_TELOMERES	-0.7252623	-1.6210337	0.023809524	0.47584304	0.965
REACTOME_SYNTHESIS_AND_INTERCONVERSION_OF_NUCLEOTIDE_DI_AND_TRIPHOSPHATES	-0.7619423000000001	-1.6705580000000002	0.00204918	0.47961859999999995	0.91
REACTOME_PREFOLDIN_MEDIATED_TRANSFER_OF_SUBSTRATE_TO_CCT_TRIC	-0.5254121	-1.3778371	0.16135459	0.48005554	1.0
BIOCARTA_SRCRPTP_PATHWAY	-0.7187353	-1.3824593	0.09163347	0.48133633	1.0
REACTOME_REGULATION_OF_APOPTOSIS	-0.5099229000000001	-1.3754368000000001	0.17849898	0.48166752	1.0
BIOCARTA_AKAPCENTROSOME_PATHWAY	-0.5951063	-1.378551	0.06967985	0.4826214	1.0
KEGG_NON_HOMOLOGOUS_END_JOINING	-0.55774564	-1.3792198	0.15204678	0.48544478	1.0
REACTOME_SHC_MEDIATED_SIGNALLING	-0.53809756	-1.3718531	0.11293635	0.48631522	1.0
REACTOME_MITOTIC_M_M_G1_PHASES	-0.67821604	-1.6448569	0.010060363000000001	0.48658290000000004	0.9470000000000001
REACTOME_METABOLISM_OF_NON_CODING_RNA	-0.5184896999999999	-1.3666937	0.16326529999999997	0.4866816	1.0
KEGG_CYSTEINE_AND_METHIONINE_METABOLISM	-0.4875401	-1.3646951999999999	0.09657948	0.48772147	1.0
REACTOME_APC_C_CDC20_MEDIATED_DEGRADATION_OF_MITOTIC_PROTEINS	-0.6131766	-1.3679976	0.17598344	0.48772287	1.0
BIOCARTA_G1_PATHWAY	-0.46985206	-1.3691986	0.09233791400000001	0.48879442	1.0
REACTOME_REGULATORY_RNA_PATHWAYS	-0.53935444	-1.3608991000000001	0.15959597	0.4890307	1.0
REACTOME_SHC_RELATED_EVENTS	-0.49572772	-1.3591328999999999	0.11340206	0.48925117	1.0
REACTOME_S_PHASE	-0.6827768	-1.6236585	0.012170386000000002	0.49023536	0.965
REACTOME_RAS_ACTIVATION_UOPN_CA2_INFUX_THROUGH_NMDA_RECEPTOR	-0.50589985	-1.3612518	0.15927419	0.49245992	1.0
KEGG_BASE_EXCISION_REPAIR	-0.5857083000000001	-1.6267141999999999	0.033268099999999995	0.5047087	0.9640000000000001
REACTOME_TELOMERE_MAINTENANCE	-0.7036061	-1.6755790000000002	0.007920792	0.50575304	0.903
BIOCARTA_UCALPAIN_PATHWAY	-0.49310037	-1.3508165	0.14949495	0.5058165	1.0
REACTOME_NUCLEOTIDE_EXCISION_REPAIR	-0.48485684	-1.3394104	0.14741036	0.5067343	1.0
REACTOME_INHIBITION_OF_REPLICATION_INITIATION_OF_DAMAGED_DNA_BY_RB1_E2F1	-0.55205935	-1.3423458000000001	0.19615385	0.50739336	1.0
REACTOME_HOMOLOGOUS_RECOMBINATION_REPAIR_OF_REPLICATION_INDEPENDENT_DOUBLE_STRAND_BREAKS	-0.50964624	-1.3406711	0.16698657	0.5076191	1.0
REACTOME_G2_M_DNA_DAMAGE_CHECKPOINT	-0.77193844	-1.3430604	0.10220441	0.50958246	1.0
REACTOME_ARMS_MEDIATED_ACTIVATION	-0.51790583	-1.3461388	0.15705766	0.510016	1.0
REACTOME_EARLY_PHASE_OF_HIV_LIFE_CYCLE	-0.5729350000000001	-1.3471551000000002	0.17791411	0.51146966	1.0
REACTOME_DOUBLE_STRAND_BREAK_REPAIR	-0.50999564	-1.3439098999999999	0.18252428	0.5116118	1.0
REACTOME_PROCESSIVE_SYNTHESIS_ON_THE_LAGGING_STRAND	-0.7655528	-1.6472754	0.011881188999999999	0.5126649	0.945
REACTOME_APC_C_CDH1_MEDIATED_DEGRADATION_OF_CDC20_AND_OTHER_APC_C_CDH1_TARGETED_PROTEINS_IN_LATE_MITOSIS_EARLY_G1	-0.5658163	-1.3110639	0.2389937	0.51612824	1.0
REACTOME_SCF_BETA_TRCP_MEDIATED_DEGRADATION_OF_EMI1	-0.57030445	-1.3113551	0.22526316	0.5190176999999999	1.0
REACTOME_GLUCONEOGENESIS	-0.48456907	-1.3119686000000002	0.16443595	0.52117753	1.0
REACTOME_ANTIVIRAL_MECHANISM_BY_IFN_STIMULATED_GENES	-0.49743682	-1.3070712	0.20711297	0.5223686	1.0
REACTOME_INHIBITION_OF_THE_PROTEOLYTIC_ACTIVITY_OF_APC_C_REQUIRED_FOR_THE_ONSET_OF_ANAPHASE_BY_MITOTIC_SPINDLE_CHECKPOINT_COMPONENTS	-0.6968941999999999	-1.3174668999999999	0.18163672	0.5228297000000001	1.0
REACTOME_DESTABILIZATION_OF_MRNA_BY_BRF1	-0.47254562	-1.3189509	0.168	0.5229589	1.0
REACTOME_REGULATION_OF_ORNITHINE_DECARBOXYLASE_ODC	-0.5610956	-1.3125603000000001	0.22821577	0.5235536	1.0
REACTOME_NEP_NS2_INTERACTS_WITH_THE_CELLULAR_EXPORT_MACHINERY	-0.5038843	-1.3249879999999998	0.20235756	0.5236649	1.0
REACTOME_TRANSPORT_OF_INORGANIC_CATIONS_ANIONS_AND_AMINO_ACIDS_OLIGOPEPTIDES	-0.39926985	-1.3155187	0.08264463	0.52369225	1.0
REACTOME_DNA_REPAIR	-0.42782012	-1.3031621	0.18540435	0.52429557	1.0
REACTOME_DESTABILIZATION_OF_MRNA_BY_AUF1_HNRNP_D0	-0.541989	-1.3041638	0.2593361	0.52542514	1.0
REACTOME_P53_INDEPENDENT_G1_S_DNA_DAMAGE_CHECKPOINT	-0.5648159	-1.3226695	0.22661123	0.52543503	1.0
REACTOME_BASIGIN_INTERACTIONS	-0.51232976	-1.3304766000000001	0.1307054	0.52587044	1.0
REACTOME_METABOLISM_OF_MRNA	-0.35167658	-1.3131591999999999	0.20564516	0.5259376	1.0
BIOCARTA_STATHMIN_PATHWAY	-0.6041448	-1.3192745000000001	0.15606937	0.52608496	1.0
REACTOME_ER_PHAGOSOME_PATHWAY	-0.55413944	-1.3255233999999998	0.20869565	0.5262375	1.0
BIOCARTA_KREB_PATHWAY	-0.61612517	-1.2942973	0.22222222	0.5276793000000001	1.0
KEGG_RNA_DEGRADATION	-0.4603455	-1.3278608	0.17681728	0.52868295	1.0
REACTOME_BASE_EXCISION_REPAIR	-0.5319904000000001	-1.3198104	0.18431373	0.52884763	1.0
REACTOME_METABOLISM_OF_RNA	-0.37290403	-1.32597	0.18852459	0.5293196	1.0
REACTOME_G1_S_TRANSITION	-0.6957366	-1.6284103	0.00811359	0.52977103	0.963
REACTOME_PROLONGED_ERK_ACTIVATION_EVENTS	-0.4863255999999999	-1.2991571000000002	0.20866142	0.5304966	1.0
KEGG_P53_SIGNALING_PATHWAY	-0.45015368	-1.2944531000000001	0.10843374	0.53100294	1.0
REACTOME_PROTEIN_FOLDING	-0.39172366	-1.2954233	0.18577075	0.5322875	1.0
REACTOME_DOWNREGULATION_OF_ERBB2_ERBB3_SIGNALING	-0.50477177	-1.2903671	0.20512821	0.53369373	1.0
REACTOME_MRNA_SPLICING_MINOR_PATHWAY	-0.47823527	-1.2954947	0.25413224	0.53580314	1.0
REACTOME_DESTABILIZATION_OF_MRNA_BY_KSRP	-0.46390334	-1.2845235000000002	0.18687873	0.5367651	1.0
REACTOME_RNA_POL_I_TRANSCRIPTION_INITIATION	-0.50144655	-1.2858624	0.18257262	0.53710073	1.0
REACTOME_DEADENYLATION_DEPENDENT_MRNA_DECAY	-0.44377276	-1.2869823	0.18951613	0.5381085999999999	1.0
REACTOME_REGULATION_OF_MRNA_STABILITY_BY_PROTEINS_THAT_BIND_AU_RICH_ELEMENTS	-0.43276629999999994	-1.270756	0.24579832	0.5411646	1.0
BIOCARTA_P27_PATHWAY	-0.57702017	-1.268268	0.23735408	0.5433489	1.0
REACTOME_PYRIMIDINE_METABOLISM	-0.49557188	-1.2710101999999999	0.18699187	0.54399705	1.0
KEGG_STEROID_BIOSYNTHESIS	-0.616609	-1.2719234	0.16893204	0.5453356	1.0
REACTOME_SHC1_EVENTS_IN_EGFR_SIGNALING	-0.50505465	-1.2728114	0.18032786	0.5467276999999999	1.0
KEGG_PROTEASOME	-0.56728977	-1.2735973999999999	0.27083334	0.54833275	1.0
BIOCARTA_CHEMICAL_PATHWAY	-0.46890578	-1.2630988	0.22289157	0.5485	1.0
BIOCARTA_MAL_PATHWAY	-0.42931294	-1.2747802	0.18390805	0.54899836	1.0
REACTOME_METABOLISM_OF_AMINO_ACIDS_AND_DERIVATIVES	-0.38277274	-1.2643708	0.128	0.549045	1.0
KEGG_PROGESTERONE_MEDIATED_OOCYTE_MATURATION	-0.37821609999999994	-1.2613662	0.13766729999999996	0.5490961	1.0
REACTOME_AUTODEGRADATION_OF_THE_E3_UBIQUITIN_LIGASE_COP1	-0.53917783	-1.2756528	0.26875	0.55055135	1.0
KEGG_VIBRIO_CHOLERAE_INFECTION	-0.3931157	-1.277032	0.16338582	0.5510144	1.0
REACTOME_DNA_REPLICATION	-0.6974477	-1.6771200000000002	0.003992016	0.5530845999999999	0.903
REACTOME_CHROMOSOME_MAINTENANCE	-0.6201455	-1.6859069	0.013833992	0.56524765	0.878
BIOCARTA_MPR_PATHWAY	-0.47746766	-1.2520705	0.18181819	0.5676845	1.0
REACTOME_SULFUR_AMINO_ACID_METABOLISM	-0.46262097	-1.2504274	0.15020576	0.56824076	1.0
REACTOME_CREB_PHOSPHORYLATION_THROUGH_THE_ACTIVATION_OF_CAMKII	-0.46815678	-1.2488155	0.20958084	0.5685581999999999	1.0
REACTOME_PHOSPHORYLATION_OF_THE_APC_C	-0.6510413	-1.2466409999999999	0.27234927	0.5701434	1.0
REACTOME_TRANSPORT_OF_RIBONUCLEOPROTEINS_INTO_THE_HOST_NUCLEUS	-0.44852933	-1.2375951	0.26937985	0.58114606	1.0
REACTOME_CROSS_PRESENTATION_OF_SOLUBLE_EXOGENOUS_ANTIGENS_ENDOSOMES	-0.5126609000000001	-1.2399924999999998	0.28008299999999997	0.58249646	1.0
REACTOME_PROCESSING_OF_CAPPED_INTRON_CONTAINING_PRE_MRNA	-0.3676233	-1.2381612	0.25548902	0.5832315	1.0
BIOCARTA_SARS_PATHWAY	-0.6118905	-1.2306128	0.2306163	0.5911837	1.0
REACTOME_HOST_INTERACTIONS_OF_HIV_FACTORS	-0.4236438	-1.2311127	0.3127572	0.5935298999999999	1.0
REACTOME_TRANSPORT_OF_MATURE_MRNA_DERIVED_FROM_AN_INTRONLESS_TRANSCRIPT	-0.44450128	-1.2278046999999999	0.26347306	0.5941524	1.0
BIOCARTA_PROTEASOME_PATHWAY	-0.55056286	-1.224286	0.33127573	0.59897757	1.0
KEGG_PURINE_METABOLISM	-0.30356008	-1.2195686000000001	0.15936255	0.60346824	1.0
REACTOME_MRNA_PROCESSING	-0.34670842	-1.22028	0.26274509999999995	0.60519224	1.0
REACTOME_GLUCOSE_METABOLISM	-0.39468002	-1.2138674999999999	0.22286822	0.61007816	1.0
BIOCARTA_RAB_PATHWAY	-0.5791682	-1.2144691	0.23636363	0.6120081999999999	1.0
REACTOME_REGULATION_OF_GLUCOKINASE_BY_GLUCOKINASE_REGULATORY_PROTEIN	-0.4233923	-1.192593	0.29882812	0.6129496999999999	1.0
REACTOME_SHC_MEDIATED_CASCADE	-0.36759442	-1.193517	0.24596775	0.613961	1.0
KEGG_BLADDER_CANCER	-0.42331323	-1.1935263999999999	0.19175258	0.6171795	1.0
REACTOME_SOS_MEDIATED_SIGNALLING	-0.48638704	-1.1827489	0.24899599	0.6191899000000001	1.0
REACTOME_RNA_POL_III_TRANSCRIPTION_TERMINATION	-0.49856108	-1.1840369	0.2965932	0.6193521	1.0
REACTOME_FANCONI_ANEMIA_PATHWAY	-0.49926946	-1.1938591	0.3009901	0.6197714	1.0
REACTOME_RECRUITMENT_OF_NUMA_TO_MITOTIC_CENTROSOMES	-0.66365737	-1.1950969	0.2935421	0.62039965	1.0
REACTOME_ANDROGEN_BIOSYNTHESIS	-0.552558	-1.1840721	0.2889813	0.62247556	1.0
REACTOME_METABOLISM_OF_POLYAMINES	-0.5258729	-1.1868765	0.27530363	0.6226565	1.0
KEGG_FOLATE_BIOSYNTHESIS	-0.5729518	-1.1954185	0.26452905	0.62296414	1.0
REACTOME_POST_CHAPERONIN_TUBULIN_FOLDING_PATHWAY	-0.46542	-1.1964683999999999	0.2566735	0.6239753	1.0
BIOCARTA_ETC_PATHWAY	-0.5360731	-1.1992105	0.31568229999999997	0.6243359	1.0
REACTOME_SIGNALING_BY_WNT	-0.443068	-1.1846362	0.32719836	0.62450945	1.0
REACTOME_AUTODEGRADATION_OF_CDH1_BY_CDH1_APC_C	-0.4964483	-1.1972388	0.32157677	0.62549365	1.0
REACTOME_ENOS_ACTIVATION_AND_REGULATION	-0.46497154	-1.1996869	0.21572581	0.62672985	1.0
REACTOME_INFLUENZA_LIFE_CYCLE	-0.31863764	-1.2031302	0.31474105	0.6289479	1.0
REACTOME_VIF_MEDIATED_DEGRADATION_OF_APOBEC3G	-0.51619464	-1.1999263999999998	0.33263159999999997	0.6295361999999999	1.0
REACTOME_GLUCOSE_TRANSPORT	-0.35450894	-1.200334	0.25540274	0.6321014	1.0
REACTOME_MHC_CLASS_II_ANTIGEN_PRESENTATION	-0.4118493	-1.2032022	0.23306774	0.6322667	1.0
REACTOME_RNA_POL_II_TRANSCRIPTION	-0.35424843	-1.1743017	0.30769232	0.6356519	1.0
KEGG_OXIDATIVE_PHOSPHORYLATION	-0.40774867	-1.1700633	0.34455445	0.64193994	1.0
REACTOME_CELL_CYCLE_MITOTIC	-0.6355496	-1.6863717	0.005940594	0.6432625	0.877
REACTOME_FORMATION_OF_ATP_BY_CHEMIOSMOTIC_COUPLING	-0.53133225	-1.1672018999999998	0.37195122	0.6450916999999999	1.0
REACTOME_MRNA_SPLICING	-0.34080353	-1.1653323	0.31474105	0.6459982	1.0
KEGG_CARDIAC_MUSCLE_CONTRACTION	-0.3372966	-1.1403264	0.27944112	0.6498534	1.0
REACTOME_MRNA_3_END_PROCESSING	-0.3714055	-1.1413281000000002	0.31827113	0.6506076999999999	1.0
BIOCARTA_RACCYCD_PATHWAY	-0.41944385	-1.1422861999999998	0.29824559999999994	0.6516073	1.0
REACTOME_ACTIVATION_OF_BH3_ONLY_PROTEINS	-0.4915823	-1.1436152	0.2877551	0.65164346	1.0
REACTOME_CITRIC_ACID_CYCLE_TCA_CYCLE	-0.5186568	-1.1461284	0.34262950000000003	0.65185314	1.0
REACTOME_RESPIRATORY_ELECTRON_TRANSPORT	-0.47473377	-1.1443241000000002	0.38492063	0.6531114	1.0
KEGG_GALACTOSE_METABOLISM	-0.41659668	-1.1565961999999999	0.23046875	0.6533671999999999	1.0
REACTOME_INTEGRATION_OF_PROVIRUS	-0.5195725999999999	-1.1580083	0.34375	0.65347326	1.0
REACTOME_TRANSPORT_OF_MATURE_TRANSCRIPT_TO_CYTOPLASM	-0.37457209999999996	-1.1464632	0.34489402	0.6541786	1.0
REACTOME_RNA_POL_I_TRANSCRIPTION_TERMINATION	-0.47036245	-1.1596876	0.30752690000000005	0.6562121	1.0
KEGG_TASTE_TRANSDUCTION	-0.39689112	-1.1580576	0.30241936	0.65659374	1.0
REACTOME_PURINE_RIBONUCLEOSIDE_MONOPHOSPHATE_BIOSYNTHESIS	-0.52592933	-1.1467366	0.33805668	0.6567018	1.0
REACTOME_CHOLESTEROL_BIOSYNTHESIS	-0.5439649999999999	-1.1342885	0.33007812	0.6572737	1.0
REACTOME_STRIATED_MUSCLE_CONTRACTION	-0.53639597	-1.1327757999999999	0.36382535	0.6579292	1.0
REACTOME_ACYL_CHAIN_REMODELLING_OF_PC	-0.44299006	-1.1531423	0.27559054	0.6580158	1.0
REACTOME_PLATELET_CALCIUM_HOMEOSTASIS	-0.4014081	-1.1351677	0.3255814	0.65848196	1.0
REACTOME_AKT_PHOSPHORYLATES_TARGETS_IN_THE_CYTOSOL	-0.42041588	-1.1472356000000001	0.2874494	0.65871954	1.0
REACTOME_ANTIGEN_PROCESSING_UBIQUITINATION_PROTEASOME_DEGRADATION	-0.3545377	-1.1509503	0.3313253	0.6598201	1.0
BIOCARTA_SKP2E2F_PATHWAY	-0.49209878	-1.1283776	0.36779323	0.6615831999999999	1.0
REACTOME_DESTABILIZATION_OF_MRNA_BY_TRISTETRAPROLIN_TTP	-0.40056524	-1.148616	0.303719	0.6617616999999999	1.0
BIOCARTA_DNAFRAGMENT_PATHWAY	-0.6027115	-1.147267	0.33463034	0.6617957	1.0
REACTOME_TCA_CYCLE_AND_RESPIRATORY_ELECTRON_TRANSPORT	-0.41665426	-1.1296282	0.36272544	0.6619885999999999	1.0
BIOCARTA_P53_PATHWAY	-0.43208238	-1.1266918	0.31477928	0.6623651999999999	1.0
REACTOME_ANTIGEN_PROCESSING_CROSS_PRESENTATION	-0.44311228	-1.1221184	0.36842105	0.66965955	1.0
REACTOME_ACYL_CHAIN_REMODELLING_OF_PG	-0.47566864	-1.1167042	0.33786407	0.6723534000000001	1.0
REACTOME_HIV_INFECTION	-0.35721759999999997	-1.1135409	0.38271606	0.6732170999999999	1.0
KEGG_RNA_POLYMERASE	-0.42500407	-1.1171441999999998	0.374502	0.6742741999999999	1.0
REACTOME_RNA_POL_III_TRANSCRIPTION	-0.3928952	-1.11429	0.36969697	0.67451334	1.0
REACTOME_INTRINSIC_PATHWAY_FOR_APOPTOSIS	-0.4079953	-1.1183907	0.35515872	0.67455614	1.0
REACTOME_FGFR_LIGAND_BINDING_AND_ACTIVATION	-0.38523722	-1.1096774	0.33203125	0.67596865	1.0
REACTOME_SIGNALING_BY_FGFR_MUTANTS	-0.33302853	-1.1106690000000001	0.30142567	0.6767603	1.0
REACTOME_CLASS_I_MHC_MEDIATED_ANTIGEN_PROCESSING_PRESENTATION	-0.33481187	-1.1078795	0.36309522	0.6770979	1.0
REACTOME_MTORC1_MEDIATED_SIGNALLING	-0.478282	-1.1061786	0.36293435	0.6779210999999999	1.0
REACTOME_HIV_LIFE_CYCLE	-0.33997154	-1.1032661	0.37951806	0.67834735	1.0
BIOCARTA_TEL_PATHWAY	-0.38561999999999996	-1.1015806000000001	0.34285715	0.6792329	1.0
REACTOME_GRB2_EVENTS_IN_ERBB2_SIGNALING	-0.41419129999999993	-1.1035955	0.31960785	0.68053013	1.0
REACTOME_DIGESTION_OF_DIETARY_CARBOHYDRATE	-0.67574525	-1.0925076	0.41104296	0.6842577	1.0
REACTOME_CONVERSION_FROM_APC_C_CDC20_TO_APC_C_CDH1_IN_LATE_ANAPHASE	-0.51272315	-1.0937937	0.40208334	0.68433297	1.0
KEGG_VALINE_LEUCINE_AND_ISOLEUCINE_BIOSYNTHESIS	-0.43136704	-1.0950303999999997	0.37724552	0.6845593000000001	1.0
REACTOME_N_GLYCAN_ANTENNAE_ELONGATION	-0.3997684	-1.0952398	0.33791748	0.6869732	1.0
KEGG_GLYCINE_SERINE_AND_THREONINE_METABOLISM	-0.4197694	-1.087826	0.31300813	0.68836915	1.0
REACTOME_AMINO_ACID_SYNTHESIS_AND_INTERCONVERSION_TRANSAMINATION	-0.46736792	-1.0864432	0.37394959999999994	0.6884159000000001	1.0
REACTOME_APOPTOSIS	-0.32300436	-1.0958288	0.34764826	0.6885189	1.0
KEGG_GLUTATHIONE_METABOLISM	-0.41566023	-1.0890893999999998	0.32480314	0.6886564000000001	1.0
REACTOME_PURINE_METABOLISM	-0.41680056	-1.0820610000000002	0.38235295	0.694964	1.0
REACTOME_CELL_CYCLE	-0.6197526999999999	-1.709993	0.001996008	0.70277476	0.818
REACTOME_PYRUVATE_METABOLISM_AND_CITRIC_ACID_TCA_CYCLE	-0.42852995	-1.0765373	0.402834	0.70378697	1.0
REACTOME_SIGNALING_BY_INSULIN_RECEPTOR	-0.2647967	-1.0663479999999999	0.33918127	0.70531493	1.0
REACTOME_NEF_MEDIATED_DOWNREGULATION_OF_MHC_CLASS_I_COMPLEX_CELL_SURFACE_EXPRESSION	-0.43388554	-1.0649776000000002	0.38923395	0.70545894	1.0
REACTOME_INSULIN_RECEPTOR_SIGNALLING_CASCADE	-0.2595569	-1.0675518999999998	0.3326923	0.70550907	1.0
REACTOME_CLASS_C_3_METABOTROPIC_GLUTAMATE_PHEROMONE_RECEPTORS	-0.48464313	-1.073724	0.44181459999999995	0.7067361	1.0
REACTOME_REGULATION_OF_HYPOXIA_INDUCIBLE_FACTOR_HIF_BY_OXYGEN	-0.34731072	-1.067572	0.3669355	0.7082506	1.0
REACTOME_PURINE_SALVAGE	-0.48645115	-1.0676303	0.39014372	0.7109496	1.0
REACTOME_TRYPTOPHAN_CATABOLISM	-0.6391422	-1.0591808999999999	0.45674044	0.7121346	1.0
BIOCARTA_CCR3_PATHWAY	-0.33381486	-1.0600424	0.38019803	0.7130387	1.0
REACTOME_SLC_MEDIATED_TRANSMEMBRANE_TRANSPORT	-0.26395008	-1.0691373	0.30645162	0.7134359	1.0
REACTOME_RAP1_SIGNALLING	-0.39888063	-1.0676941	0.384	0.7136446	1.0
KEGG_HOMOLOGOUS_RECOMBINATION	-0.6776211	-1.7876816000000002	0.0	0.7193232	0.5710000000000001
REACTOME_HYALURONAN_UPTAKE_AND_DEGRADATION	-0.40270892	-1.0495193999999999	0.38709676	0.72695905	1.0
REACTOME_SHC1_EVENTS_IN_ERBB4_SIGNALING	-0.38979400000000003	-1.0504878	0.40304184	0.7275812	1.0
REACTOME_GLUTATHIONE_CONJUGATION	-0.40454492	-1.041552	0.40556659999999994	0.7378347	1.0
REACTOME_LATE_PHASE_OF_HIV_LIFE_CYCLE	-0.32281529999999997	-1.0423108	0.44488978	0.7392943000000001	1.0
BIOCARTA_CACAM_PATHWAY	-0.40669099999999997	-1.0349065	0.4137214	0.74008995	1.0
KEGG_O_GLYCAN_BIOSYNTHESIS	-0.40115145	-1.0361224	0.4048583	0.74041414	1.0
REACTOME_O_LINKED_GLYCOSYLATION_OF_MUCINS	-0.36150903	-1.0369534	0.39173228	0.74164164	1.0
REACTOME_SIGNALING_BY_NODAL	-0.34374616	-1.0383446	0.40576923	0.74166834	1.0
REACTOME_RESPIRATORY_ELECTRON_TRANSPORT_ATP_SYNTHESIS_BY_CHEMIOSMOTIC_COUPLING_AND_HEAT_PRODUCTION_BY_UNCOUPLING_PROTEINS_	-0.4063593	-1.0324594999999999	0.46399999999999997	0.7423741999999999	1.0
REACTOME_MITOTIC_G2_G2_M_PHASES	-0.5236841	-1.6872218	0.017374517	0.7426769	0.8740000000000001
REACTOME_G1_PHASE	-0.35244542	-1.0309566	0.42913386	0.74271315	1.0
KEGG_PARKINSONS_DISEASE	-0.3540737	-1.0209723	0.47657840000000007	0.7606274000000001	1.0
BIOCARTA_GCR_PATHWAY	0.55073434	1.5080548999999999	0.054655872	0.76114404	0.9990000000000001
REACTOME_PROCESSING_OF_CAPPED_INTRONLESS_PRE_MRNA	-0.6959022	-1.838546	0.003960396	0.7635234000000001	0.377
REACTOME_INTERFERON_SIGNALING	-0.36134836	-1.017686	0.46569645	0.7648361	1.0
REACTOME_METAL_ION_SLC_TRANSPORTERS	-0.44229895	-1.0129316	0.4446764	0.769005	1.0
KEGG_THYROID_CANCER	-0.34794092	-1.014173	0.45490983	0.7693949000000001	1.0
REACTOME_REGULATED_PROTEOLYSIS_OF_P75NTR	0.58811283	1.5088052	0.0703125	0.7783659	0.9990000000000001
KEGG_SYSTEMIC_LUPUS_ERYTHEMATOSUS	-0.35080743	-1.0067861999999999	0.44806516	0.77874523	1.0
REACTOME_APOPTOSIS_INDUCED_DNA_FRAGMENTATION	-0.44739038	-1.0032545	0.49800798	0.7803978	1.0
REACTOME_G_ALPHA1213_SIGNALLING_EVENTS	0.32229728	1.3109623	0.08779443	0.7804489	1.0
REACTOME_DEGRADATION_OF_THE_EXTRACELLULAR_MATRIX	-0.43506283	-1.0042834999999999	0.4550898	0.7812145	1.0
REACTOME_REGULATION_OF_WATER_BALANCE_BY_RENAL_AQUAPORINS	0.40922493	1.3161966	0.11587982599999999	0.78143054	1.0
REACTOME_ACTIVATED_TLR4_SIGNALLING	0.3908498	1.3888272	0.070564516	0.7822834	1.0
BIOCARTA_PDGF_PATHWAY	0.44513547	1.3139606000000001	0.13127413	0.78300595	1.0
REACTOME_GLYCOSAMINOGLYCAN_METABOLISM	0.44545302	1.3814585	0.08966862	0.7842146	1.0
REACTOME_TRIF_MEDIATED_TLR3_SIGNALING	0.3554884	1.3171041	0.10099010000000001	0.7849829	1.0
REACTOME_KERATAN_SULFATE_DEGRADATION	0.7909289	1.4019413	0.05811623	0.7850090000000001	1.0
REACTOME_REGULATION_OF_INSULIN_SECRETION_BY_ACETYLCHOLINE	0.56327707	1.3996617	0.1018711	0.7852826999999999	1.0
REACTOME_SEMA4D_IN_SEMAPHORIN_SIGNALING	0.46289673	1.3114183000000001	0.13535354	0.7855831999999999	1.0
KEGG_BETA_ALANINE_METABOLISM	0.52296644	1.3205863000000002	0.1284585	0.7860491	1.0
BIOCARTA_MONOCYTE_PATHWAY	0.7250741999999999	1.31859	0.1521739	0.7866973	1.0
REACTOME_GPVI_MEDIATED_ACTIVATION_CASCADE	0.5266571	1.3830898999999999	0.13480885	0.7873294	1.0
REACTOME_TOLL_RECEPTOR_CASCADES	0.39291220000000004	1.4059701	0.07968128	0.78828377	1.0
BIOCARTA_IL5_PATHWAY	0.59842515	1.3217239	0.15009746	0.7886004	1.0
REACTOME_CELL_EXTRACELLULAR_MATRIX_INTERACTIONS	0.5731626	1.3895342	0.14663951	0.7891800999999999	1.0
KEGG_ADHERENS_JUNCTION	0.37005335	1.3846484	0.060669456	0.7903321	1.0
KEGG_ONE_CARBON_POOL_BY_FOLATE	-0.6855879	-1.7187731	0.003883495	0.7905188	0.792
BIOCARTA_VEGF_PATHWAY	-0.30830806	-0.99722743	0.45	0.7905453	1.0
REACTOME_GLUCAGON_TYPE_LIGAND_RECEPTORS	0.40739852	1.4027246000000002	0.10784314	0.79241073	1.0
REACTOME_INTERFERON_ALPHA_BETA_SIGNALING	-0.44050276	-0.993383	0.48232847	0.7929814000000001	1.0
REACTOME_APOBEC3G_MEDIATED_RESISTANCE_TO_HIV1_INFECTION	-0.533523	-0.9944495000000001	0.5229541	0.793517	1.0
BIOCARTA_ERYTH_PATHWAY	0.49453205	1.2148763	0.24609375	0.7943238	1.0
KEGG_ASCORBATE_AND_ALDARATE_METABOLISM	0.63176674	1.216005	0.21084337	0.7953557	1.0
REACTOME_GLUCAGON_SIGNALING_IN_METABOLIC_REGULATION	0.42435372	1.3217261	0.12770563	0.7958352	1.0
REACTOME_NUCLEAR_EVENTS_KINASE_AND_TRANSCRIPTION_FACTOR_ACTIVATION	0.50964254	1.3902572	0.10950413	0.796133	1.0
BIOCARTA_CBL_PATHWAY	0.5571284000000001	1.4064037	0.091649696	0.79767865	1.0
REACTOME_ADP_SIGNALLING_THROUGH_P2RY1	0.49496025	1.5092461000000001	0.06315789	0.7979566	0.9990000000000001
REACTOME_ACTIVATION_OF_NF_KAPPAB_IN_B_CELLS	-0.37645024	-0.988283	0.4979424	0.79796576	1.0
REACTOME_RIP_MEDIATED_NFKB_ACTIVATION_VIA_DAI	0.46057132	1.3716358999999998	0.09398496	0.79805446	1.0
BIOCARTA_LONGEVITY_PATHWAY	0.5309015	1.187376	0.28942117	0.7984251	1.0
BIOCARTA_NFKB_PATHWAY	0.43343338	1.3247262	0.13980582	0.79843503	1.0
KEGG_ENDOCYTOSIS	0.278487	1.1705356000000002	0.1736527	0.7984899000000001	1.0
BIOCARTA_STEM_PATHWAY	0.4822438	1.284302	0.21401516	0.7987456000000001	1.0
REACTOME_REGULATION_OF_COMPLEMENT_CASCADE	0.5757646	1.1689067	0.28962818	0.79896945	1.0
KEGG_CITRATE_CYCLE_TCA_CYCLE	-0.39032543	-0.9891613000000001	0.48039216	0.79901016	1.0
KEGG_OTHER_GLYCAN_DEGRADATION	0.54398435	1.2877302	0.20948617	0.79954416	1.0
BIOCARTA_INFLAM_PATHWAY	0.42459440000000004	1.2160351	0.26425856	0.79989904	1.0
KEGG_VASOPRESSIN_REGULATED_WATER_REABSORPTION	0.39327690000000004	1.3018955	0.15891473	0.80029774	1.0
REACTOME_BMAL1_CLOCK_NPAS2_ACTIVATES_CIRCADIAN_EXPRESSION	0.46230483	1.3916833	0.08064516	0.8004022	1.0
REACTOME_ERKS_ARE_INACTIVATED	0.573828	1.3223416000000001	0.18290259	0.80071944	1.0
REACTOME_GAB1_SIGNALOSOME	0.34826472	1.1710033000000002	0.22509961	0.8010391	1.0
REACTOME_G_ALPHA_Z_SIGNALLING_EVENTS	0.39689493	1.3258941	0.10633947	0.80111617	1.0
BIOCARTA_AT1R_PATHWAY	0.43046117	1.2185166	0.20731707	0.80158514	1.0
BIOCARTA_CTCF_PATHWAY	0.48209497	1.1877128000000001	0.22504893	0.80165404	1.0
BIOCARTA_CLASSIC_PATHWAY	0.67593503	1.2852172	0.18627451	0.8021099	1.0
BIOCARTA_FAS_PATHWAY	0.40534452	1.1818999	0.2430279	0.8024757	1.0
KEGG_FATTY_ACID_METABOLISM	0.48768052	1.3031069	0.16255145	0.802517	1.0
REACTOME_PI3K_EVENTS_IN_ERBB4_SIGNALING	0.38469570000000003	1.2033219	0.23092784	0.80258954	1.0
REACTOME_ENDOGENOUS_STEROLS	0.47704044	1.1775421	0.2837838	0.8028179	1.0
KEGG_ADIPOCYTOKINE_SIGNALING_PATHWAY	0.36978649999999996	1.2195393	0.200409	0.80285466	1.0
REACTOME_FORMATION_OF_FIBRIN_CLOT_CLOTTING_CASCADE	0.52742183	1.375091	0.08565737	0.8029061	1.0
REACTOME_SIGNALING_BY_NOTCH3	0.5117784000000001	1.2018783000000002	0.23399999999999999	0.8029439	1.0
BIOCARTA_P35ALZHEIMERS_PATHWAY	0.5351884	1.2165872	0.26680243	0.8029464	1.0
REACTOME_GASTRIN_CREB_SIGNALLING_PATHWAY_VIA_PKC_AND_MAPK	0.30420202	1.233121	0.1307847	0.80320865	1.0
REACTOME_NFKB_ACTIVATION_THROUGH_FADD_RIP1_PATHWAY_MEDIATED_BY_CASPASE_8_AND10	-0.47104374	-0.98422354	0.49688148	0.80364406	1.0
KEGG_ALANINE_ASPARTATE_AND_GLUTAMATE_METABOLISM	0.41547403	1.1800351999999998	0.21880998	0.80375856	1.0
REACTOME_SRP_DEPENDENT_COTRANSLATIONAL_PROTEIN_TARGETING_TO_MEMBRANE	-0.27302706	-0.9828203999999999	0.48155737	0.80399346	1.0
REACTOME_DEVELOPMENTAL_BIOLOGY	0.28223228	1.1956829	0.14867617	0.8040038	1.0
KEGG_PROPANOATE_METABOLISM	0.46510068	1.182684	0.25656566	0.80427116	1.0
BIOCARTA_BARRESTIN_PATHWAY	0.5910598000000001	1.4967513000000001	0.059734512000000003	0.8043051	1.0
REACTOME_SIGNAL_ATTENUATION	0.49056350000000004	1.229701	0.22199592	0.80431056	1.0
REACTOME_RESPONSE_TO_ELEVATED_PLATELET_CYTOSOLIC_CA2_	0.40807799	1.2311877	0.19057377	0.8043878000000001	1.0
REACTOME_HEPARAN_SULFATE_HEPARIN_HS_GAG_METABOLISM	0.41041562	1.1711011999999998	0.23732251	0.8047831	1.0
REACTOME_AQUAPORIN_MEDIATED_TRANSPORT	0.36999047	1.2706133	0.12684989	0.8047965	1.0
REACTOME_COMPLEMENT_CASCADE	0.59143496	1.4073815	0.09664694	0.80484736	1.0
REACTOME_NUCLEAR_RECEPTOR_TRANSCRIPTION_PATHWAY	0.38583395	1.1880316999999998	0.22307692	0.804959	1.0
KEGG_MAPK_SIGNALING_PATHWAY	0.32048026	1.3722450000000002	0.023346303	0.804979	1.0
BIOCARTA_TCR_PATHWAY	0.4720014	1.3269033000000001	0.15490197	0.80513525	1.0
KEGG_LONG_TERM_DEPRESSION	0.32127735	1.1781499	0.21621622	0.80518985	1.0
REACTOME_ADVANCED_GLYCOSYLATION_ENDPRODUCT_RECEPTOR_SIGNALING	0.49404025	1.2878911	0.204	0.8053167	1.0
REACTOME_CELL_CELL_COMMUNICATION	0.3329072	1.2038695	0.16666667	0.805388	1.0
BIOCARTA_GLEEVEC_PATHWAY	0.45536629999999995	1.1966867	0.23473282	0.8054375	1.0
KEGG_TGF_BETA_SIGNALING_PATHWAY	0.37262353	1.2200258999999998	0.19308943	0.80619437	1.0
BIOCARTA_ETS_PATHWAY	0.49174064	1.2337621	0.22307692	0.8061955	1.0
REACTOME_A_TETRASACCHARIDE_LINKER_SEQUENCE_IS_REQUIRED_FOR_GAG_SYNTHESIS	0.54594994	1.2245356	0.22560975	0.8063796999999999	1.0
REACTOME_TRAFFICKING_AND_PROCESSING_OF_ENDOSOMAL_TLR	0.6117385000000001	1.2214684	0.27944112	0.8063953	1.0
REACTOME_CHONDROITIN_SULFATE_DERMATAN_SULFATE_METABOLISM	0.46932152	1.2351778999999998	0.20916335	0.8065228	1.0
KEGG_REGULATION_OF_ACTIN_CYTOSKELETON	0.2823952	1.2078693	0.15953307	0.8066223000000001	1.0
REACTOME_PKA_MEDIATED_PHOSPHORYLATION_OF_CREB	0.45372742	1.1605755	0.24737945	0.8068801999999999	1.0
KEGG_VALINE_LEUCINE_AND_ISOLEUCINE_DEGRADATION	0.51223	1.2911767	0.18292683	0.8069636	1.0
REACTOME_G_BETA_GAMMA_SIGNALLING_THROUGH_PLC_BETA	0.39236516	1.2048295	0.24130879999999996	0.8069914	1.0
KEGG_INTESTINAL_IMMUNE_NETWORK_FOR_IGA_PRODUCTION	0.49814627	1.1831639999999999	0.30136988	0.8070693	1.0
REACTOME_COLLAGEN_FORMATION	0.54053676	1.2257388	0.23968565	0.80753046	1.0
KEGG_AXON_GUIDANCE	0.3332387	1.3282834	0.07157895	0.807562	1.0
BIOCARTA_RNA_PATHWAY	0.48483232	1.2762408	0.17560074	0.8081691	1.0
BIOCARTA_TALL1_PATHWAY	0.52173877	1.2979516000000002	0.15851273	0.8084564000000001	1.0
BIOCARTA_IL2_PATHWAY	0.46122217	1.1898758	0.254	0.8084696	1.0
KEGG_LEISHMANIA_INFECTION	0.46652920000000003	1.2223437	0.26907632	0.8084960999999999	1.0
KEGG_EPITHELIAL_CELL_SIGNALING_IN_HELICOBACTER_PYLORI_INFECTION	0.32241642	1.161353	0.23126338	0.80851126	1.0
REACTOME_SIGNALING_BY_ROBO_RECEPTOR	0.39885125	1.1711639999999999	0.26522595	0.8086333	1.0
REACTOME_GLYCOPROTEIN_HORMONES	-0.49336258	-0.97913563	0.5069859999999999	0.80888796	1.0
KEGG_NEUROTROPHIN_SIGNALING_PATHWAY	0.30579492	1.2778125	0.09343936	0.808909	1.0
KEGG_ACUTE_MYELOID_LEUKEMIA	0.33755568	1.1625402	0.21011673	0.8090174	1.0
BIOCARTA_LAIR_PATHWAY	0.65768945	1.3669658000000002	0.12133072	0.80905366	1.0
REACTOME_CIRCADIAN_CLOCK	0.38955438	1.3298823999999998	0.10642570000000001	0.8090626999999999	1.0
KEGG_ECM_RECEPTOR_INTERACTION	0.45801276	1.1880589	0.26122448	0.8091666999999999	1.0
REACTOME_TRANSCRIPTIONAL_REGULATION_OF_WHITE_ADIPOCYTE_DIFFERENTIATION	0.45099413	1.2267052999999999	0.25396827	0.8091736999999999	1.0
REACTOME_BIOSYNTHESIS_OF_THE_N_GLYCAN_PRECURSOR_DOLICHOL_LIPID_LINKED_OLIGOSACCHARIDE_LLO_AND_TRANSFER_TO_A_NASCENT_PROTEIN	0.49943869999999996	1.288668	0.22222222	0.80924106	1.0
REACTOME_IL_RECEPTOR_SHC_SIGNALING	0.42692542	1.2055377	0.26391754	0.8093151	1.0
REACTOME_CGMP_EFFECTS	0.49289492	1.1968329	0.3	0.8093924	1.0
REACTOME_CD28_DEPENDENT_PI3K_AKT_SIGNALING	0.46733457	1.2709492	0.16666667	0.80956537	1.0
BIOCARTA_TPO_PATHWAY	0.41508722	1.155484	0.27667984	0.80978894	1.0
BIOCARTA_IL2RB_PATHWAY	0.38925809999999994	1.1635591	0.23874755	0.8099010999999999	1.0
BIOCARTA_PPARA_PATHWAY	0.41170109999999993	1.1721995	0.24693878	0.8099187	1.0
BIOCARTA_BCR_PATHWAY	0.42071354	1.2083297	0.23564357	0.80995613	1.0
REACTOME_NFKB_AND_MAP_KINASES_ACTIVATION_MEDIATED_BY_TLR4_SIGNALING_REPERTOIRE	0.3595281	1.258821	0.13877551	0.8100736999999999	1.0
REACTOME_REGULATION_OF_KIT_SIGNALING	0.5275483	1.2722898999999999	0.20120725	0.8106051999999999	1.0
REACTOME_PROLACTIN_RECEPTOR_SIGNALING	0.5274722	1.3917271999999998	0.10934394	0.81111383	1.0
KEGG_FC_EPSILON_RI_SIGNALING_PATHWAY	0.35349354	1.2353843	0.20781893	0.8111642	1.0
BIOCARTA_CELL2CELL_PATHWAY	-0.33656420000000004	-0.97510386	0.49803149999999996	0.81182915	1.0
KEGG_GLYCEROPHOSPHOLIPID_METABOLISM	0.28805390000000003	1.1575223999999997	0.24489796	0.8118321	1.0
KEGG_ASTHMA	0.5623057	1.2933829	0.23588710000000002	0.81191117	1.0
REACTOME_IL_3_5_AND_GM_CSF_SIGNALING	0.40784368	1.1974281	0.26530612	0.812158	1.0
BIOCARTA_EPO_PATHWAY	0.51491785	1.4083978000000001	0.082840234	0.8122418	1.0
REACTOME_IL_6_SIGNALING	0.5426186	1.1900468000000002	0.2514507	0.8122600999999999	1.0
REACTOME_PD1_SIGNALING	0.6395451999999999	1.1559571000000002	0.37623763	0.81227666	1.0
REACTOME_HS_GAG_BIOSYNTHESIS	0.47054678	1.2614538999999998	0.16702355	0.81241083	1.0
BIOCARTA_IL6_PATHWAY	0.48011708	1.2785697	0.19132149	0.81241685	1.0
REACTOME_BILE_SALT_AND_ORGANIC_ANION_SLC_TRANSPORTERS	0.606528	1.2914298999999998	0.15510204	0.8127141999999999	1.0
REACTOME_NEUROTRANSMITTER_RECEPTOR_BINDING_AND_DOWNSTREAM_TRANSMISSION_IN_THE_POSTSYNAPTIC_CELL	0.29683697	1.1407079	0.26476577	0.8130944	1.0
REACTOME_HYALURONAN_METABOLISM	-0.35288832	-0.97280747	0.48347107	0.81355387	1.0
REACTOME_SIGNAL_AMPLIFICATION	0.38169384	1.1722919	0.25726143	0.8137546999999999	1.0
KEGG_BIOSYNTHESIS_OF_UNSATURATED_FATTY_ACIDS	-0.38829103	-0.97548413	0.4891945	0.8139074000000001	1.0
REACTOME_GAP_JUNCTION_ASSEMBLY	0.49350384	1.2592461000000001	0.21568628	0.8142823	1.0
BIOCARTA_TNFR1_PATHWAY	0.4517157	1.3386985	0.115079366	0.81451577	1.0
REACTOME_SYNTHESIS_OF_PE	0.5430201	1.2727680000000001	0.18525897	0.8148626	1.0
KEGG_JAK_STAT_SIGNALING_PATHWAY	0.32207470000000005	1.1905487	0.20477137	0.81518394	1.0
BIOCARTA_PITX2_PATHWAY	-0.36376867	-0.97071075	0.50489235	0.8152414000000001	1.0
BIOCARTA_CD40_PATHWAY	0.5852583	1.5102216	0.07007576	0.81534624	0.9990000000000001
REACTOME_SIGNALING_BY_NOTCH2	0.53487194	1.2522285	0.19477911	0.81537455	1.0
KEGG_ARRHYTHMOGENIC_RIGHT_VENTRICULAR_CARDIOMYOPATHY_ARVC	0.34634990000000004	1.1384889999999999	0.26883909999999994	0.8155265	1.0
KEGG_CYTOKINE_CYTOKINE_RECEPTOR_INTERACTION	0.35649437	1.1410142	0.2923077	0.8158941999999999	1.0
REACTOME_ADENYLATE_CYCLASE_INHIBITORY_PATHWAY	0.5568801999999999	1.3321271000000001	0.11578947	0.8160484	1.0
KEGG_MATURITY_ONSET_DIABETES_OF_THE_YOUNG	-0.3170895	-0.96892256	0.51926976	0.8161818000000001	1.0
BIOCARTA_EGF_PATHWAY	0.41999766	1.2353992	0.18546845	0.8163806	1.0
KEGG_GAP_JUNCTION	0.32444257	1.240358	0.13911289999999998	0.8164070999999999	1.0
REACTOME_HS_GAG_DEGRADATION	0.5189933	1.2370341999999999	0.20612244	0.81656045	1.0
REACTOME_HORMONE_SENSITIVE_LIPASE_HSL_MEDIATED_TRIACYLGLYCEROL_HYDROLYSIS	0.60533535	1.1352639	0.35450820000000005	0.8168331	1.0
REACTOME_PLATELET_SENSITIZATION_BY_LDL	0.505814	1.3299198	0.13894737	0.81686985	1.0
KEGG_GLYCEROLIPID_METABOLISM	0.41053677	1.2938662	0.12989691	0.8168835999999999	1.0
KEGG_ALPHA_LINOLENIC_ACID_METABOLISM	0.46195695	1.1365732	0.31120333	0.8170400999999999	1.0
REACTOME_ACTIVATION_OF_NMDA_RECEPTOR_UPON_GLUTAMATE_BINDING_AND_POSTSYNAPTIC_EVENTS	0.45730925	1.3399875	0.11943319999999999	0.81721604	1.0
KEGG_VASCULAR_SMOOTH_MUSCLE_CONTRACTION	0.34847346	1.2548860000000002	0.11715481400000001	0.81725353	1.0
REACTOME_THROMBIN_SIGNALLING_THROUGH_PROTEINASE_ACTIVATED_RECEPTORS_PARS	0.41480559999999994	1.3360002	0.13052632	0.81743073	1.0
BIOCARTA_NDKDYNAMIN_PATHWAY	0.444481	1.2616448	0.18623482	0.81767523	1.0
KEGG_LEUKOCYTE_TRANSENDOTHELIAL_MIGRATION	0.36547434	1.2529964	0.16767676	0.81824225	1.0
REACTOME_EFFECTS_OF_PIP2_HYDROLYSIS	0.3924282	1.1426556	0.29006085	0.8185214	1.0
REACTOME_INITIAL_TRIGGERING_OF_COMPLEMENT	0.6490607	1.2479573	0.24705882	0.8185308000000001	1.0
REACTOME_P75NTR_SIGNALS_VIA_NFKB	0.3609998	1.1267334999999998	0.30245748	0.8191191999999999	1.0
REACTOME_COSTIMULATION_BY_THE_CD28_FAMILY	0.39896563	1.1411378	0.30923694	0.81918824	1.0
REACTOME_ABACAVIR_TRANSPORT_AND_METABOLISM	0.54101735	1.1328582	0.33264464	0.8199174000000001	1.0
KEGG_GLYCOSAMINOGLYCAN_BIOSYNTHESIS_CHONDROITIN_SULFATE	0.5667759	1.4094440000000001	0.12355212	0.8201033000000001	1.0
BIOCARTA_IL7_PATHWAY	0.54763776	1.2374508	0.2601626	0.8205524	1.0
REACTOME_MYD88_MAL_CASCADE_INITIATED_ON_PLASMA_MEMBRANE	0.3774872	1.3432859	0.084337346	0.82056147	1.0
KEGG_B_CELL_RECEPTOR_SIGNALING_PATHWAY	0.42976552	1.3410678999999999	0.1521739	0.82085216	1.0
REACTOME_LIPID_DIGESTION_MOBILIZATION_AND_TRANSPORT	0.4109392	1.1499190000000001	0.30020705	0.8209223	1.0
BIOCARTA_HIVNEF_PATHWAY	0.3333255	1.1431233	0.2715105	0.82094973	1.0
REACTOME_MAP_KINASE_ACTIVATION_IN_TLR_CASCADE	0.37034568	1.2406101	0.17706238	0.8210572	1.0
REACTOME_INTRINSIC_PATHWAY	0.4044572	1.1273203	0.32730925	0.82107824	1.0
KEGG_FOCAL_ADHESION	0.4041458	1.3329735	0.1307847	0.82112753	1.0
REACTOME_SYNTHESIS_OF_PIPS_AT_THE_EARLY_ENDOSOME_MEMBRANE	0.48886326	1.1443919	0.31546393	0.8212219000000001	1.0
REACTOME_PHASE1_FUNCTIONALIZATION_OF_COMPOUNDS	0.44884858	1.2639755	0.16089614	0.82149875	1.0
REACTOME_POST_NMDA_RECEPTOR_ACTIVATION_EVENTS	0.3986777	1.2487338	0.18049793	0.8215998999999999	1.0
BIOCARTA_RANKL_PATHWAY	0.4761367	1.1456411	0.3104126	0.8217131	1.0
REACTOME_TGF_BETA_RECEPTOR_SIGNALING_IN_EMT_EPITHELIAL_TO_MESENCHYMAL_TRANSITION	0.4651572	1.3615863000000001	0.12008282	0.8224256999999999	1.0
BIOCARTA_BAD_PATHWAY	0.44181272	1.1281242	0.29805616	0.8225209000000001	1.0
BIOCARTA_THELPER_PATHWAY	0.64436096	1.1109143	0.43452382	0.8227358	1.0
BIOCARTA_HDAC_PATHWAY	0.40819320000000003	1.2618353	0.17107943	0.8230044	1.0
REACTOME_SEMA3A_PLEXIN_REPULSION_SIGNALING_BY_INHIBITING_INTEGRIN_ADHESION	0.59310526	1.3507818	0.16435644	0.8231461999999999	1.0
REACTOME_DEFENSINS	-0.43128479999999997	-0.9600277	0.50784314	0.8235591999999998	1.0
REACTOME_PLATELET_ACTIVATION_SIGNALING_AND_AGGREGATION	0.36626437	1.3446001	0.1018711	0.8236447	1.0
BIOCARTA_TCRA_PATHWAY	0.69268334	1.1288415	0.42074364	0.8240917	1.0
BIOCARTA_BLYMPHOCYTE_PATHWAY	0.6652324000000001	1.1461235	0.35714287	0.8241040000000001	1.0
REACTOME_PLATELET_HOMEOSTASIS	0.32085094	1.2412534	0.19715448	0.8244581	1.0
BIOCARTA_RAS_PATHWAY	-0.29892078	-0.9619469999999999	0.49710983	0.8250898000000001	1.0
REACTOME_SYNTHESIS_OF_PIPS_AT_THE_GOLGI_MEMBRANE	0.3517818	1.1166034	0.31983805	0.82517207	1.0
KEGG_APOPTOSIS	0.30359444	1.1110905	0.32854208	0.8257279000000001	1.0
BIOCARTA_CALCINEURIN_PATHWAY	-0.33256379999999996	-0.9602530999999999	0.49019608	0.8258605	1.0
REACTOME_ACTIVATED_NOTCH1_TRANSMITS_SIGNAL_TO_THE_NUCLEUS	0.41207734	1.1467258999999999	0.296875	0.8262091999999999	1.0
KEGG_HISTIDINE_METABOLISM	0.5077644	1.3480238000000002	0.10891089	0.8262427	1.0
BIOCARTA_NKCELLS_PATHWAY	0.5072799	1.2422756000000001	0.23446894	0.82663137	1.0
KEGG_FC_GAMMA_R_MEDIATED_PHAGOCYTOSIS	0.3253394	1.1147145	0.29791668	0.8266585999999999	1.0
KEGG_ALDOSTERONE_REGULATED_SODIUM_REABSORPTION	0.349681	1.1119663999999998	0.29006085	0.82670563	1.0
REACTOME_ETHANOL_OXIDATION	0.75733554	1.243847	0.20842105	0.8268711	1.0
REACTOME_PROSTACYCLIN_SIGNALLING_THROUGH_PROSTACYCLIN_RECEPTOR	0.38522214	1.1289865	0.3211382	0.8274053	1.0
REACTOME_TRNA_AMINOACYLATION	-0.35440773	-0.9620284	0.53556484	0.82778	1.0
REACTOME_FGFR4_LIGAND_BINDING_AND_ACTIVATION	-0.37829062	-0.95662624	0.5074946	0.8278568000000001	1.0
KEGG_PROSTATE_CANCER	0.3017526	1.1167111	0.23868313	0.82832485	1.0
REACTOME_ACTIVATION_OF_THE_AP1_FAMILY_OF_TRANSCRIPTION_FACTORS	0.6803055	1.5201733999999998	0.04208417	0.8286084	0.9990000000000001
REACTOME_SIGNALING_BY_RHO_GTPASES	0.31203258	1.3454046999999998	0.06818182	0.8288992000000001	1.0
KEGG_VIRAL_MYOCARDITIS	0.38880405	1.1061591999999998	0.35214007	0.82894695	1.0
REACTOME_SIGNALING_BY_ERBB4	0.3124531	1.1120726	0.28767124	0.8299238000000001	1.0
KEGG_COLORECTAL_CANCER	0.3356264	1.1214403	0.2519685	0.82997924	1.0
BIOCARTA_CDMAC_PATHWAY	0.5381673	1.3512752000000001	0.10192308	0.8302625	1.0
REACTOME_TRANSMISSION_ACROSS_CHEMICAL_SYNAPSES	0.29805374	1.1172372	0.28514057	0.8303983	1.0
REACTOME_INNATE_IMMUNE_SYSTEM	0.31197152	1.1068829	0.33066133	0.8304514000000001	1.0
REACTOME_EXTRINSIC_PATHWAY_FOR_APOPTOSIS	0.54817754	1.3574048	0.15779093	0.83140266	1.0
KEGG_RENAL_CELL_CARCINOMA	0.27817574	1.1181431	0.25494072	0.83147776	1.0
REACTOME_G_ALPHA_Q_SIGNALLING_EVENTS	0.364014	1.4096498	0.04771372	0.8318804	1.0
REACTOME_PI3K_EVENTS_IN_ERBB2_SIGNALING	0.32883492	1.0463094000000002	0.39227644	0.83222425	1.0
KEGG_BASAL_TRANSCRIPTION_FACTORS	-0.31345394	-0.9530187	0.51167315	0.83269244	1.0
REACTOME_NITRIC_OXIDE_STIMULATES_GUANYLATE_CYCLASE	0.42722150000000003	1.1189582	0.37425742	0.83295226	1.0
REACTOME_SIGNALING_BY_PDGF	0.31129596	1.0447599	0.38969073	0.83296365	1.0
REACTOME_THE_NLRP3_INFLAMMASOME	0.4580142	1.043353	0.42040816	0.83335185	1.0
BIOCARTA_HCMV_PATHWAY	0.39328	1.0421263	0.42277992	0.8333625	1.0
REACTOME_G_PROTEIN_BETA_GAMMA_SIGNALLING	0.31346548	1.0799118	0.37651822	0.8337097	1.0
BIOCARTA_PML_PATHWAY	0.36871820000000005	1.0468154	0.38461540000000005	0.8338532	1.0
BIOCARTA_GATA3_PATHWAY	0.47330716	1.0774063999999999	0.36798337	0.83390343	1.0
REACTOME_PI3K_AKT_ACTIVATION	0.3501444	1.0782112	0.34530938	0.8349633	1.0
BIOCARTA_NTHI_PATHWAY	0.5098542	1.5109975	0.06031128400000001	0.8350030999999999	0.9990000000000001
REACTOME_CA_DEPENDENT_EVENTS	0.3684947	1.0570918	0.35217392	0.8352419	1.0
REACTOME_TRAF6_MEDIATED_INDUCTION_OF_NFKB_AND_MAP_KINASES_UPON_TLR7_8_OR_9_ACTIVATION	0.37151858	1.3521401000000002	0.08032128	0.8354552	1.0
KEGG_SULFUR_METABOLISM	0.44888064	1.0387658000000002	0.45867768	0.8357180000000001	1.0
REACTOME_GABA_B_RECEPTOR_ACTIVATION	0.33383954	1.0375701	0.39085240000000004	0.8358502	1.0
REACTOME_ACETYLCHOLINE_BINDING_AND_DOWNSTREAM_EVENTS	0.41372183	1.036007	0.44090056	0.8365158000000001	1.0
BIOCARTA_LYM_PATHWAY	0.59624255	1.052924	0.47070706	0.8365403	1.0
BIOCARTA_MET_PATHWAY	0.33908832	1.0800402	0.33402059999999995	0.83657676	1.0
REACTOME_NOTCH_HLH_TRANSCRIPTION_PATHWAY	0.38414443	1.0468599	0.40828404	0.83666134	1.0
BIOCARTA_DC_PATHWAY	0.44720200000000004	1.100364	0.38076153	0.8370188000000001	1.0
KEGG_CALCIUM_SIGNALING_PATHWAY	0.25147113	1.0538747	0.36951983	0.8372335999999999	1.0
REACTOME_PHOSPHORYLATION_OF_CD3_AND_TCR_ZETA_CHAINS	0.66818315	1.080807	0.47609562	0.8378253000000001	1.0
BIOCARTA_CTL_PATHWAY	0.5816695	1.0390525	0.5106383	0.8378264999999999	1.0
BIOCARTA_ACE2_PATHWAY	0.52565116	1.0572411	0.40458015	0.8378331	1.0
REACTOME_INTEGRATION_OF_ENERGY_METABOLISM	0.26719946	1.047304	0.38223140000000005	0.8384903	1.0
REACTOME_ACTIVATED_POINT_MUTANTS_OF_FGFR2	0.39484417	1.0577809999999999	0.40118578	0.83945066	1.0
BIOCARTA_IL3_PATHWAY	0.4448852	1.1006821000000002	0.34113059999999995	0.8395787	1.0
REACTOME_OTHER_SEMAPHORIN_INTERACTIONS	0.5543680999999999	1.4106426	0.08939709	0.8396530999999999	1.0
REACTOME_METABOLISM_OF_CARBOHYDRATES	0.23195834	0.93694824	0.5810276999999999	0.8398488000000002	1.0
BIOCARTA_TOB1_PATHWAY	0.44246298	1.0539981	0.39884394	0.83992267	1.0
REACTOME_IL_7_SIGNALING	0.46658057	1.0490226	0.43089432	0.83997124	1.0
REACTOME_SEMA4D_INDUCED_CELL_MIGRATION_AND_GROWTH_CONE_COLLAPSE	0.38332447	1.0735639	0.37371662	0.840377	1.0
KEGG_PROXIMAL_TUBULE_BICARBONATE_RECLAMATION	0.4022343	1.0476565	0.37371662	0.8404771000000001	1.0
REACTOME_PROTEOLYTIC_CLEAVAGE_OF_SNARE_COMPLEX_PROTEINS	0.37234664	1.0697798	0.37401575	0.8405534	1.0
REACTOME_REGULATION_OF_INSULIN_SECRETION	0.29141384	1.0500281	0.36252546	0.84062433	1.0
REACTOME_ABC_FAMILY_PROTEINS_MEDIATED_TRANSPORT	0.3718127	1.0808458	0.3469388	0.8409578999999999	1.0
KEGG_BASAL_CELL_CARCINOMA	0.36166704	1.0330157	0.38783270000000003	0.84101695	1.0
REACTOME_REGULATION_OF_INSULIN_LIKE_GROWTH_FACTOR_IGF_ACTIVITY_BY_INSULIN_LIKE_GROWTH_FACTOR_BINDING_PROTEINS_IGFBPS	0.43513617	0.9740815999999999	0.48126233	0.84154546	1.0
BIOCARTA_EXTRINSIC_PATHWAY	0.48475695	0.9413520000000001	0.55467194	0.8416444	1.0
BIOCARTA_PLATELETAPP_PATHWAY	0.45611742	0.9371069	0.5602294	0.8416620000000001	1.0
REACTOME_SIGNALING_BY_GPCR	0.2301462	0.90953594	0.59266406	0.84166276	1.0
REACTOME_SEROTONIN_RECEPTORS	0.4433309	1.0818594	0.374	0.84182304	1.0
REACTOME_SYNTHESIS_SECRETION_AND_INACTIVATION_OF_GLP1	0.39836505	0.9401068000000001	0.52880657	0.84203535	1.0
BIOCARTA_AMI_PATHWAY	0.46673283	0.97487175	0.48126233	0.84227246	1.0
REACTOME_TRAFFICKING_OF_GLUR2_CONTAINING_AMPA_RECEPTORS	0.4330666	1.0577941000000002	0.38821137	0.8424379999999999	1.0
REACTOME_POST_TRANSLATIONAL_MODIFICATION_SYNTHESIS_OF_GPI_ANCHORED_PROTEINS	0.34012482	0.93458897	0.5392354	0.84247637	1.0
KEGG_TOLL_LIKE_RECEPTOR_SIGNALING_PATHWAY	0.29543808	0.910075	0.5479451999999999	0.84264374	1.0
REACTOME_NETRIN1_SIGNALING	0.45070407	1.5223396999999999	0.051502146	0.8426438	0.9990000000000001
REACTOME_BILE_ACID_AND_BILE_SALT_METABOLISM	0.33762103	0.9419002000000001	0.5322581000000001	0.8427041	1.0
REACTOME_SYNTHESIS_OF_SUBSTRATES_IN_N_GLYCAN_BIOSYTHESIS	0.41406366	0.97231126	0.48178136	0.8428914000000001	1.0
REACTOME_CYTOCHROME_P450_ARRANGED_BY_SUBSTRATE_TYPE	0.32624343	0.9300359	0.54247105	0.843043	1.0
KEGG_CHRONIC_MYELOID_LEUKEMIA	0.24159053	0.93209326	0.56614786	0.8431009	1.0
REACTOME_ACTIVATION_OF_CHAPERONE_GENES_BY_XBP1S	0.28265733	0.9331019	0.5235294	0.84331954	1.0
REACTOME_EXTRACELLULAR_MATRIX_ORGANIZATION	0.38016006	0.9373319	0.51450676	0.8434195	1.0
REACTOME_CELL_JUNCTION_ORGANIZATION	0.30059087	0.94263184	0.522541	0.84345037	1.0
REACTOME_PEPTIDE_LIGAND_BINDING_RECEPTORS	0.29520512	0.9158716999999998	0.5764023	0.8435465	1.0
KEGG_PHOSPHATIDYLINOSITOL_SIGNALING_SYSTEM	0.23187964	0.91695803	0.6296295999999999	0.84362715	1.0
BIOCARTA_VIP_PATHWAY	0.40811926	1.0697956	0.3863179	0.8436507	1.0
KEGG_CELL_ADHESION_MOLECULES_CAMS	0.34911922	1.0823610000000001	0.33139536	0.8437278	1.0
REACTOME_YAP1_AND_WWTR1_TAZ_STIMULATED_GENE_EXPRESSION	0.32804734	0.9763549000000001	0.49292928	0.8437779000000001	1.0
REACTOME_COMMON_PATHWAY	0.4682837	0.9750886000000001	0.5323886999999999	0.8441506	1.0
REACTOME_METABOLISM_OF_LIPIDS_AND_LIPOPROTEINS	0.23233856	0.9695233	0.48991936	0.8442457	1.0
BIOCARTA_TCAPOPTOSIS_PATHWAY	0.54806864	0.9706319999999999	0.56213015	0.8442613000000001	1.0
REACTOME_GENERATION_OF_SECOND_MESSENGER_MOLECULES	0.46044272	0.91031516	0.5951417	0.8442866	1.0
REACTOME_RORA_ACTIVATES_CIRCADIAN_EXPRESSION	0.32221928	0.96058273	0.5104167000000001	0.84433067	1.0
BIOCARTA_MAPK_PATHWAY	0.35213488	1.3522742	0.07926829	0.84443057	1.0
KEGG_DILATED_CARDIOMYOPATHY	0.28552884	0.9627333	0.475	0.84444886	1.0
REACTOME_BINDING_AND_ENTRY_OF_HIV_VIRION	0.5393281999999999	0.9175690000000001	0.61252445	0.8444538	1.0
REACTOME_REGULATION_OF_IFNG_SIGNALING	0.39017653	0.93784964	0.5378486	0.84458077	1.0
REACTOME_NGF_SIGNALLING_VIA_TRKA_FROM_THE_PLASMA_MEMBRANE	0.23653376	0.9583603999999999	0.51391864	0.84467536	1.0
REACTOME_RECYCLING_OF_BILE_ACIDS_AND_SALTS	0.39996082	0.95501536	0.5432331	0.84474975	1.0
KEGG_GLIOMA	0.25969028	0.95723027	0.51632655	0.84475255	1.0
REACTOME_CREB_PHOSPHORYLATION_THROUGH_THE_ACTIVATION_OF_RAS	0.30347398	0.93024135	0.5670103	0.8448013000000001	1.0
BIOCARTA_RAC1_PATHWAY	0.37612116	1.0580866000000002	0.34960938	0.8448468000000001	1.0
KEGG_RENIN_ANGIOTENSIN_SYSTEM	0.48371450000000005	1.0642775	0.37164749999999996	0.8449431000000001	1.0
KEGG_PRIMARY_BILE_ACID_BIOSYNTHESIS	0.40915632	1.0592433	0.38867188	0.8450278	1.0
BIOCARTA_EGFR_SMRTE_PATHWAY	0.40748173	0.94292694	0.5436893	0.8450283000000002	1.0
REACTOME_GPCR_LIGAND_BINDING	0.25724426	0.9183466999999998	0.57281554	0.8450563	1.0
REACTOME_REGULATION_OF_SIGNALING_BY_CBL	0.43226057	1.0705111	0.39799999999999996	0.8450632	1.0
BIOCARTA_CERAMIDE_PATHWAY	0.31020847	0.9108291	0.5418327	0.8451844999999999	1.0
KEGG_MTOR_SIGNALING_PATHWAY	0.29988083	1.0945618000000001	0.3197556	0.8452175999999999	1.0
KEGG_BUTANOATE_METABOLISM	0.5721225999999999	1.4555908000000002	0.058350099999999995	0.8452337	1.0
REACTOME_GLYCEROPHOSPHOLIPID_BIOSYNTHESIS	0.2853476	1.0617020000000001	0.37704918	0.8452723	1.0
REACTOME_G_BETA_GAMMA_SIGNALLING_THROUGH_PI3KGAMMA	0.3326038	1.0654157	0.36863545	0.8452735999999998	1.0
REACTOME_TCR_SIGNALING	0.39791688	0.9768191999999999	0.49402392	0.84528494	1.0
KEGG_SNARE_INTERACTIONS_IN_VESICULAR_TRANSPORT	0.3347703	0.9558379000000001	0.51262134	0.84539723	1.0
KEGG_RETINOL_METABOLISM	0.3333753	0.9191924000000001	0.5944334	0.84563595	1.0
REACTOME_AXON_GUIDANCE	0.26835144	1.0841125	0.31863728	0.8457287	1.0
REACTOME_CLASS_A1_RHODOPSIN_LIKE_RECEPTORS	0.28496236	0.9609188	0.5260116	0.84596306	1.0
BIOCARTA_TID_PATHWAY	0.4142977	1.095588	0.34325397	0.8459937	1.0
REACTOME_CELL_SURFACE_INTERACTIONS_AT_THE_VASCULAR_WALL	0.30745876	0.9199548000000001	0.5502008	0.84612596	1.0
BIOCARTA_EIF4_PATHWAY	0.35608270000000003	0.9675396999999999	0.49407116	0.84621316	1.0
REACTOME_TRAFFICKING_OF_AMPA_RECEPTORS	0.3138985	0.9220101999999999	0.59045726	0.84621507	1.0
REACTOME_MEMBRANE_TRAFFICKING	0.26370397	0.9587129999999999	0.530572	0.846233	1.0
REACTOME_INHIBITION_OF_INSULIN_SECRETION_BY_ADRENALINE_NORADRENALINE	0.38690266	1.0826597	0.34639177	0.84626925	1.0
REACTOME_BIOLOGICAL_OXIDATIONS	0.31510463	1.0296928	0.39648438	0.8462928	1.0
REACTOME_DOWNSTREAM_TCR_SIGNALING	0.41427559999999997	1.0284110999999998	0.4509804	0.8463911	1.0
REACTOME_SYNTHESIS_OF_BILE_ACIDS_AND_BILE_SALTS	0.3660733	0.9122925	0.607362	0.8464756	1.0
REACTOME_INFLAMMASOMES	0.39278668	0.96282226	0.5060241	0.84657896	1.0
REACTOME_DCC_MEDIATED_ATTRACTIVE_SIGNALING	0.5831265	1.5133208999999999	0.050847456	0.84659845	0.9990000000000001
REACTOME_SIGNALLING_BY_NGF	0.22993879	1.0623361	0.32780084	0.8467399	1.0
BIOCARTA_GRANULOCYTES_PATHWAY	0.518903	1.0659758999999998	0.43824703	0.84692246	1.0
KEGG_CHEMOKINE_SIGNALING_PATHWAY	0.28952703	0.91091955	0.5546875	0.84710366	1.0
REACTOME_INTEGRIN_CELL_SURFACE_INTERACTIONS	0.32011995	0.9430219000000001	0.49799198	0.8471174000000001	1.0
REACTOME_SIGNALING_BY_BMP	0.36414677	0.9770264000000001	0.47861508	0.8472813	1.0
REACTOME_SIGNALING_BY_EGFR_IN_CANCER	0.22551878	0.9635519	0.5080972	0.8475106	1.0
KEGG_GLYCOSAMINOGLYCAN_BIOSYNTHESIS_HEPARAN_SULFATE	0.32512257	0.9646082	0.5143443	0.8475623	1.0
BIOCARTA_RARRXR_PATHWAY	0.32843649999999996	0.96571785	0.4759036	0.8476888000000001	1.0
BIOCARTA_FIBRINOLYSIS_PATHWAY	0.56986654	1.0593633999999998	0.4027505	0.84778386	1.0
BIOCARTA_GPCR_PATHWAY	0.32471052	0.9254665000000001	0.55852157	0.84778386	1.0
BIOCARTA_CSK_PATHWAY	0.4373044	0.97788316	0.5050100000000001	0.8478966999999998	1.0
REACTOME_G_ALPHA_S_SIGNALLING_EVENTS	0.25153264	0.9052017	0.6	0.8479045000000001	1.0
REACTOME_SYNTHESIS_OF_GLYCOSYLPHOSPHATIDYLINOSITOL_GPI	0.3673478	0.92011404	0.56626505	0.8479119	1.0
KEGG_NEUROACTIVE_LIGAND_RECEPTOR_INTERACTION	0.25300846	0.92220074	0.5570866	0.8480270000000001	1.0
BIOCARTA_HER2_PATHWAY	0.397735	1.0909284	0.34355828	0.84809905	1.0
REACTOME_REGULATION_OF_THE_FANCONI_ANEMIA_PATHWAY	0.54322743	1.0856725	0.4084507	0.8481504999999999	1.0
BIOCARTA_EDG1_PATHWAY	0.29799834	0.92422867	0.55284554	0.848226	1.0
REACTOME_CD28_CO_STIMULATION	0.36240625	1.0264608	0.44855967	0.8483221	1.0
BIOCARTA_IL4_PATHWAY	0.40382156	0.9820648999999999	0.47628459999999995	0.8485404000000001	1.0
REACTOME_MITOCHONDRIAL_FATTY_ACID_BETA_OXIDATION	0.41473112	0.91229457	0.5705645	0.8485688	1.0
REACTOME_ADHERENS_JUNCTIONS_INTERACTIONS	0.34406734	0.92287046	0.5564682	0.8487872	1.0
BIOCARTA_TGFB_PATHWAY	0.33988312	0.9829665999999999	0.46268657	0.84889597	1.0
REACTOME_SEMA3A_PAK_DEPENDENT_AXON_REPULSION	0.38318035	0.97854537	0.5083333	0.8489614	1.0
REACTOME_G_PROTEIN_ACTIVATION	0.29256088	0.94321656	0.54831934	0.8489665999999999	1.0
REACTOME_VEGF_LIGAND_RECEPTOR_INTERACTIONS	0.51856244	1.0841417	0.39130434	0.84897393	1.0
REACTOME_HIGHLY_CALCIUM_PERMEABLE_POSTSYNAPTIC_NICOTINIC_ACETYLCHOLINE_RECEPTORS	0.45567322	1.0248908	0.46271512	0.84922516	1.0
REACTOME_TRAF6_MEDIATED_INDUCTION_OF_TAK1_COMPLEX	0.42977658	0.9495769000000001	0.55009824	0.84930927	1.0
REACTOME_ACTIVATION_OF_IRF3_IRF7_MEDIATED_BY_TBK1_IKK_EPSILON	0.42588827	0.92566836	0.5717091999999999	0.8495273999999999	1.0
REACTOME_LIGAND_GATED_ION_CHANNEL_TRANSPORT	0.41512954	0.9793291	0.49898580000000003	0.8496414000000001	1.0
REACTOME_HEMOSTASIS	0.21696737	0.898992	0.64132553	0.8498208	1.0
KEGG_TYPE_I_DIABETES_MELLITUS	0.38266233	0.90313774	0.5820000000000001	0.85000235	1.0
BIOCARTA_BCELLSURVIVAL_PATHWAY	0.34694168	0.9438200000000001	0.56496066	0.8500218	1.0
KEGG_LONG_TERM_POTENTIATION	0.2600177	0.9513370999999999	0.53503186	0.8502539000000001	1.0
REACTOME_RNA_POL_III_CHAIN_ELONGATION	-0.42660704	-0.94180846	0.54016066	0.8502663	1.0
REACTOME_PI_METABOLISM	0.26194975	0.98340935	0.4884696	0.85036886	1.0
REACTOME_IMMUNOREGULATORY_INTERACTIONS_BETWEEN_A_LYMPHOID_AND_A_NON_LYMPHOID_CELL	0.37181014	0.90182996	0.58704454	0.8505418	1.0
REACTOME_RNA_POL_III_TRANSCRIPTION_INITIATION_FROM_TYPE_3_PROMOTER	-0.35210532	-0.94299036	0.5472836999999999	0.8506853000000001	1.0
REACTOME_REGULATION_OF_INSULIN_SECRETION_BY_GLUCAGON_LIKE_PEPTIDE1	0.2702329	0.8994897	0.5975104	0.8508505999999999	1.0
REACTOME_SYNTHESIS_OF_PIPS_AT_THE_LATE_ENDOSOME_MEMBRANE	0.5540018	1.5254846000000002	0.06748466	0.85093623	0.9990000000000001
BIOCARTA_TCYTOTOXIC_PATHWAY	0.6487046	1.0910524	0.46153846	0.8512216	1.0
REACTOME_DAG_AND_IP3_SIGNALING	0.31298256	0.9841576	0.45010614	0.8512284	1.0
KEGG_WNT_SIGNALING_PATHWAY	0.2945742	1.0857603999999998	0.30681820000000004	0.8512874	1.0
REACTOME_ENERGY_DEPENDENT_REGULATION_OF_MTOR_BY_LKB1_AMPK	0.29220518	0.94430155	0.52964425	0.8513205	1.0
REACTOME_GPCR_DOWNSTREAM_SIGNALING	0.2516665	0.9496473	0.52964425	0.85147536	1.0
REACTOME_NRAGE_SIGNALS_DEATH_THROUGH_JNK	0.26178828	0.97961426	0.4888889	0.85148877	1.0
REACTOME_PLATELET_ADHESION_TO_EXPOSED_COLLAGEN	0.44023392	0.9851039	0.49418604	0.8515994	1.0
BIOCARTA_VDR_PATHWAY	0.3514241	0.8969976000000001	0.5800866	0.85165566	1.0
REACTOME_CRMPS_IN_SEMA3A_SIGNALING	0.58595335	1.4108675	0.101052634	0.85167855	1.0
KEGG_TIGHT_JUNCTION	0.22969693	0.89579797	0.65050507	0.8518716000000001	1.0
REACTOME_LIPOPROTEIN_METABOLISM	0.37019807	1.0879348999999998	0.3438155	0.852309	1.0
REACTOME_PIP3_ACTIVATES_AKT_SIGNALING	0.30237284	1.0029988	0.43529412	0.85238385	1.0
REACTOME_GABA_SYNTHESIS_RELEASE_REUPTAKE_AND_DEGRADATION	0.43327686	0.89958215	0.582505	0.85269934	1.0
BIOCARTA_IL12_PATHWAY	0.38854244	0.89421207	0.5868726	0.8530289000000001	1.0
REACTOME_SYNTHESIS_OF_PA	0.33353499999999997	0.9855115	0.47071130000000005	0.8531206	1.0
REACTOME_CIRCADIAN_REPRESSION_OF_EXPRESSION_BY_REV_ERBA	0.36852744	1.0863161	0.34907597	0.8531257999999999	1.0
REACTOME_IRAK1_RECRUITS_IKK_COMPLEX	0.39886272	0.9445332000000001	0.5346939	0.8531314	1.0
BIOCARTA_PYK2_PATHWAY	0.32308874	0.9991436	0.44176707	0.8531773000000001	1.0
KEGG_PPAR_SIGNALING_PATHWAY	0.39382094	0.9864353000000001	0.4663951	0.8535451999999999	1.0
BIOCARTA_MEF2D_PATHWAY	0.32947987	1.0011392	0.43737167	0.8538870999999999	1.0
KEGG_MELANOMA	0.27945545	0.9999743000000001	0.4515464	0.8538911	1.0
REACTOME_TRANSLOCATION_OF_ZAP_70_TO_IMMUNOLOGICAL_SYNAPSE	0.6172475000000001	0.99766743	0.5533597	0.85401297	1.0
REACTOME_PPARA_ACTIVATES_GENE_EXPRESSION	0.26945987	0.9451795000000001	0.5363458000000001	0.85414267	1.0
REACTOME_FATTY_ACID_TRIACYLGLYCEROL_AND_KETONE_BODY_METABOLISM	0.25740182	0.9462540999999999	0.564257	0.85417724	1.0
KEGG_ALLOGRAFT_REJECTION	0.46627894	0.9871700999999999	0.5417515	0.85441077	1.0
REACTOME_CASPASE_MEDIATED_CLEAVAGE_OF_CYTOSKELETAL_PROTEINS	0.42089079999999995	1.0031636	0.44813278	0.85468566	1.0
BIOCARTA_FCER1_PATHWAY	0.50078464	1.4183683	0.06326531	0.8556325	1.0
REACTOME_RECYCLING_PATHWAY_OF_L1	0.29364604	0.89182687	0.60548526	0.85563534	1.0
REACTOME_EGFR_DOWNREGULATION	0.30391902	1.0036103	0.43538767	0.85626113	1.0
BIOCARTA_D4GDI_PATHWAY	0.3933063	0.8904921999999998	0.6	0.8563156	1.0
REACTOME_VIRAL_MESSENGER_RNA_SYNTHESIS	-0.39135402	-0.93738437	0.53162056	0.8563639000000001	1.0
REACTOME_PHOSPHOLIPID_METABOLISM	0.23636732	1.0046527	0.4471058	0.8565933000000001	1.0
REACTOME_MITOCHONDRIAL_TRNA_AMINOACYLATION	0.34621608	0.88062966	0.59881425	0.85692525	1.0
BIOCARTA_ACH_PATHWAY	0.3341063	0.9871815	0.48785424	0.8569655999999999	1.0
KEGG_ABC_TRANSPORTERS	0.27804133	0.8878676999999999	0.6753507	0.8571578000000001	1.0
BIOCARTA_SODD_PATHWAY	0.42391540000000005	0.8867924	0.6225295999999999	0.85719	1.0
REACTOME_OPIOID_SIGNALLING	0.2379969	0.882575	0.64316237	0.85724044	1.0
BIOCARTA_FMLP_PATHWAY	0.26775357	0.87604046	0.62033194	0.85751086	1.0
BIOCARTA_ALK_PATHWAY	0.31286803	0.9950402	0.4556701	0.8575325	1.0
REACTOME_IKK_COMPLEX_RECRUITMENT_MEDIATED_BY_RIP1	0.41948757	0.8599938	0.63469386	0.8577153000000001	1.0
REACTOME_TRAF6_MEDIATED_NFKB_ACTIVATION	0.3307353	0.88334167	0.6199616	0.8577345999999999	1.0
REACTOME_ION_CHANNEL_TRANSPORT	0.32162228	1.0121506	0.4249012	0.85776377	1.0
REACTOME_UNBLOCKING_OF_NMDA_RECEPTOR_GLUTAMATE_BINDING_AND_ACTIVATION	0.38842005	0.88438493	0.63419485	0.8577661	1.0
REACTOME_CD28_DEPENDENT_VAV1_PATHWAY	0.41600016	0.8808037000000001	0.63293654	0.85857534	1.0
BIOCARTA_CXCR4_PATHWAY	0.30661026	0.8881134	0.624498	0.8587341000000001	1.0
REACTOME_GAMMA_CARBOXYLATION_TRANSPORT_AND_AMINO_TERMINAL_CLEAVAGE_OF_PROTEINS	0.38081685	0.87750727	0.6439689000000001	0.8587617000000001	1.0
REACTOME_CTLA4_INHIBITORY_SIGNALING	0.34176213	1.0047746	0.44747079999999995	0.8590029	1.0
REACTOME_GABA_RECEPTOR_ACTIVATION	0.3223506	0.98739916	0.47861508	0.8590208	1.0
BIOCARTA_DREAM_PATHWAY	0.64730424	1.412212	0.07723577	0.85910887	1.0
REACTOME_PYRIMIDINE_CATABOLISM	0.42292938	0.8602171999999999	0.6485437	0.8591744	1.0
KEGG_T_CELL_RECEPTOR_SIGNALING_PATHWAY	0.30720666	1.0127109	0.42629483	0.8592473	1.0
BIOCARTA_WNT_PATHWAY	0.3068706	0.88466054	0.64681727	0.8592552999999999	1.0
REACTOME_SIGNALING_BY_NOTCH	0.22984585	0.8718113000000001	0.6777996000000001	0.85932636	1.0
KEGG_FRUCTOSE_AND_MANNOSE_METABOLISM	-0.30634102	-0.9249712	0.55795676	0.8593396000000001	1.0
KEGG_MELANOGENESIS	0.2592407	0.8760781999999999	0.6793587	0.85940886	1.0
REACTOME_RESOLUTION_OF_AP_SITES_VIA_THE_SINGLE_NUCLEOTIDE_REPLACEMENT_PATHWAY	0.35237399999999997	0.8609838	0.6397638000000001	0.85964966	1.0
KEGG_PATHWAYS_IN_CANCER	0.23949125	1.0147923	0.40433925	0.8597353999999999	1.0
REACTOME_PI_3K_CASCADE	0.22869956	0.82415724	0.71487606	0.8598123	1.0
REACTOME_ALPHA_LINOLENIC_ACID_ALA_METABOLISM	0.3873198	0.8577055	0.6610879	0.8599873	1.0
REACTOME_BOTULINUM_NEUROTOXICITY	0.3216058	0.8618228000000001	0.6464844	0.86010814	1.0
REACTOME_FGFR2C_LIGAND_BINDING_AND_ACTIVATION	0.3454879	0.87351966	0.6105675	0.86011297	1.0
REACTOME_HORMONE_LIGAND_BINDING_RECEPTORS	-0.4526527	-0.93413496	0.6004184	0.86025304	1.0
REACTOME_SIGNALING_BY_HIPPO	0.5466591	1.4729638999999999	0.06986028	0.86027026	1.0
KEGG_ENDOMETRIAL_CANCER	0.25841597	0.877791	0.66260165	0.86027116	1.0
BIOCARTA_ARAP_PATHWAY	-0.33002487	-0.9285445999999999	0.5329341	0.8602985000000001	1.0
KEGG_GNRH_SIGNALING_PATHWAY	0.24997600000000003	1.0134081	0.4178499	0.86032814	1.0
BIOCARTA_IL22BP_PATHWAY	0.4123666	1.0098302	0.4606299	0.86057407	1.0
REACTOME_SYNTHESIS_OF_PIPS_AT_THE_PLASMA_MEMBRANE	0.25593424	0.82152903	0.71224487	0.8605947	1.0
KEGG_INOSITOL_PHOSPHATE_METABOLISM	0.23102143	0.870136	0.68326694	0.8606719	1.0
KEGG_PROTEIN_EXPORT	-0.3611143	-0.9256587	0.55263156	0.860742	1.0
BIOCARTA_DEATH_PATHWAY	0.31743150000000003	1.0051806	0.44615385	0.86075217	1.0
BIOCARTA_TH1TH2_PATHWAY	0.3481469	0.85506266	0.62823063	0.86082035	1.0
REACTOME_SIGNALING_BY_CONSTITUTIVELY_ACTIVE_EGFR	0.28692979999999996	0.81931293	0.7425743	0.8608601999999999	1.0
REACTOME_INTERACTION_BETWEEN_L1_AND_ANKYRINS	0.30290076	0.8720184000000001	0.5987779999999999	0.8608946	1.0
KEGG_HUNTINGTONS_DISEASE	-0.274095	-0.9268382	0.5481335999999999	0.86114717	1.0
KEGG_PANTOTHENATE_AND_COA_BIOSYNTHESIS	0.37811962	0.9909271000000001	0.466	0.86127836	1.0
REACTOME_THE_ACTIVATION_OF_ARYLSULFATASES	-0.46805137	-0.9322158000000001	0.5647059	0.8613294	1.0
REACTOME_SEMAPHORIN_INTERACTIONS	0.44091156	1.4559168	0.047227927	0.86137515	1.0
REACTOME_SIGNALING_BY_NOTCH4	0.41705394	1.0060940999999999	0.44715446	0.8614212	1.0
REACTOME_PRE_NOTCH_EXPRESSION_AND_PROCESSING	0.24406229	0.81680083	0.7218935000000001	0.86146986	1.0
REACTOME_CS_DS_DEGRADATION	0.38036585	0.82424325	0.69320387	0.8614957000000001	1.0
REACTOME_BETA_DEFENSINS	0.48275065	0.86212593	0.67184466	0.8615286	1.0
REACTOME_MITOCHONDRIAL_PROTEIN_IMPORT	-0.33928278	-0.9307029	0.53521127	0.8615944999999999	1.0
BIOCARTA_PGC1A_PATHWAY	0.29858038	0.98740727	0.49269309999999994	0.8615985	1.0
KEGG_LYSOSOME	0.30710724	0.9919815000000001	0.46706587	0.86161834	1.0
REACTOME_BRANCHED_CHAIN_AMINO_ACID_CATABOLISM	0.45401424	1.0070529000000001	0.46153846	0.8617918999999999	1.0
KEGG_GRAFT_VERSUS_HOST_DISEASE	0.3818747	0.81969184	0.6679841999999999	0.86196876	1.0
BIOCARTA_ERK5_PATHWAY	0.3640164	1.0149153	0.43333334	0.86225617	1.0
KEGG_HEMATOPOIETIC_CELL_LINEAGE	0.29086798	0.8553148000000002	0.612326	0.86228144	1.0
REACTOME_STEROID_HORMONES	0.2981501	0.8215401	0.75403225	0.86235285	1.0
REACTOME_ROLE_OF_SECOND_MESSENGERS_IN_NETRIN1_SIGNALING	0.35388067	0.8509035	0.641129	0.8625280000000001	1.0
BIOCARTA_BARR_MAPK_PATHWAY	0.2976112	0.8625474	0.62091506	0.8627405999999999	1.0
REACTOME_PI3K_CASCADE	0.2161361	0.82452124	0.76458335	0.8628707	1.0
REACTOME_N_GLYCAN_ANTENNAE_ELONGATION_IN_THE_MEDIAL_TRANS_GOLGI	-0.32024813	-0.92869735	0.5633803000000001	0.86287194	1.0
REACTOME_NRIF_SIGNALS_CELL_DEATH_FROM_THE_NUCLEUS	0.27690104	0.8169776999999999	0.6732283	0.8629150999999999	1.0
REACTOME_METABOLISM_OF_STEROID_HORMONES_AND_VITAMINS_A_AND_D	0.2873009	0.8255514000000002	0.7294589	0.86293	1.0
REACTOME_PECAM1_INTERACTIONS	0.6669225000000001	1.440245	0.12401575	0.8629933000000001	1.0
REACTOME_ION_TRANSPORT_BY_P_TYPE_ATPASES	0.26505002	0.8264860999999999	0.722334	0.8631337	1.0
REACTOME_ANTIGEN_ACTIVATES_B_CELL_RECEPTOR_LEADING_TO_GENERATION_OF_SECOND_MESSENGERS	0.5546996999999999	1.4198833	0.11904762	0.8631806999999999	1.0
REACTOME_CREATION_OF_C4_AND_C2_ACTIVATORS	0.45157662	0.810154	0.7265469	0.8634453999999999	1.0
REACTOME_NEURONAL_SYSTEM	0.25422567	0.9877029	0.46450305	0.86352974	1.0
REACTOME_IL1_SIGNALING	0.28329515	1.0155497	0.4075547	0.86364174	1.0
REACTOME_CELL_DEATH_SIGNALLING_VIA_NRAGE_NRIF_AND_NADE	0.20925044	0.86633664	0.6897233	0.8636741	1.0
KEGG_NATURAL_KILLER_CELL_MEDIATED_CYTOTOXICITY	0.26546620000000004	0.81089944	0.6626506	0.8640404	1.0
REACTOME_TIE2_SIGNALING	0.30805507	0.8085955	0.7964775	0.86421424	1.0
KEGG_PRION_DISEASES	0.360962	0.9885195999999999	0.47024953	0.86423993	1.0
KEGG_N_GLYCAN_BIOSYNTHESIS	0.2824586	0.85099125	0.64785993	0.864293	1.0
KEGG_PYRUVATE_METABOLISM	0.37756184	1.0071366	0.45399999999999996	0.8643378	1.0
REACTOME_ACTIVATION_OF_KAINATE_RECEPTORS_UPON_GLUTAMATE_BINDING	0.24741271	0.8520117	0.6445396	0.86448526	1.0
BIOCARTA_GABA_PATHWAY	0.37485996	0.84357595	0.63927853	0.8645572	1.0
BIOCARTA_HIF_PATHWAY	0.31184745	0.8138154000000001	0.71224487	0.8645755999999999	1.0
KEGG_GLYCOSAMINOGLYCAN_BIOSYNTHESIS_KERATAN_SULFATE	0.36079568	0.82666606	0.7096774	0.8646099	1.0
BIOCARTA_GSK3_PATHWAY	0.31958753	0.86255497	0.67465067	0.8646723	1.0
BIOCARTA_CYTOKINE_PATHWAY	0.31057399999999996	0.8126108	0.6551724	0.86469764	1.0
KEGG_DORSO_VENTRAL_AXIS_FORMATION	0.28636834	0.866856	0.60714287	0.86471653	1.0
KEGG_ERBB_SIGNALING_PATHWAY	0.22378904	0.84423196	0.7970086	0.86524814	1.0
REACTOME_APOPTOTIC_CLEAVAGE_OF_CELLULAR_PROTEINS	0.2796546	0.8452559000000001	0.7352941	0.86530787	1.0
BIOCARTA_P38MAPK_PATHWAY	0.24176347	0.82728726	0.7430829999999999	0.8654313	1.0
BIOCARTA_TFF_PATHWAY	0.29802838	0.8111068	0.74380165	0.86548704	1.0
REACTOME_SMOOTH_MUSCLE_CONTRACTION	0.39511737	0.8641139000000001	0.6393443	0.86568373	1.0
BIOCARTA_SHH_PATHWAY	0.39173004	1.0157194	0.47530866	0.8659981	1.0
KEGG_LIMONENE_AND_PINENE_DEGRADATION	0.61424	1.4582752	0.091836736	0.86615825	1.0
REACTOME_SIGNALING_BY_ILS	0.25570703	0.86278963	0.60474306	0.86619544	1.0
REACTOME_G_ALPHA_I_SIGNALLING_EVENTS	0.25962126	0.8277106	0.70254403	0.8664514000000001	1.0
REACTOME_RECEPTOR_LIGAND_BINDING_INITIATES_THE_SECOND_PROTEOLYTIC_CLEAVAGE_OF_NOTCH_RECEPTOR	0.36245370000000005	0.8476616	0.62880325	0.8666896999999999	1.0
KEGG_UBIQUITIN_MEDIATED_PROTEOLYSIS	-0.25834185	-0.9197948	0.5820000000000001	0.8667060999999999	1.0
REACTOME_NEGATIVE_REGULATION_OF_THE_PI3K_AKT_NETWORK	0.4494809	1.0165918	0.43788190000000005	0.86673695	1.0
REACTOME_AMINE_LIGAND_BINDING_RECEPTORS	0.30793473	0.83692664	0.64484125	0.8668126	1.0
BIOCARTA_ARF_PATHWAY	0.32999587	0.8389133	0.678501	0.86702514	1.0
REACTOME_MYOGENESIS	0.24882714	0.8410633	0.6666667	0.8670459	1.0
KEGG_HYPERTROPHIC_CARDIOMYOPATHY_HCM	0.2513152	0.8398915000000001	0.68390805	0.86711985	1.0
REACTOME_P75_NTR_RECEPTOR_MEDIATED_SIGNALLING	0.19006254	0.8453026	0.701581	0.8671286	1.0
REACTOME_NUCLEOTIDE_LIKE_PURINERGIC_RECEPTORS	0.5853233	1.4484017	0.06138614	0.867131	1.0
BIOCARTA_CARDIACEGF_PATHWAY	0.6519868000000001	1.4133888000000001	0.04660194	0.8673412	1.0
REACTOME_CELL_CELL_JUNCTION_ORGANIZATION	0.26052278	0.8052866	0.7592593000000001	0.86782277	1.0
REACTOME_P75NTR_RECRUITS_SIGNALLING_COMPLEXES	0.28268045	0.82794505	0.6882590999999999	0.86787766	1.0
REACTOME_PTM_GAMMA_CARBOXYLATION_HYPUSINE_FORMATION_AND_ARYLSULFATASE_ACTIVATION	0.2904104	0.83716094	0.71428573	0.86823803	1.0
REACTOME_NEF_MEDIATES_DOWN_MODULATION_OF_CELL_SURFACE_RECEPTORS_BY_RECRUITING_THEM_TO_CLATHRIN_ADAPTERS	-0.33742547	-0.91758263	0.5638945	0.8684341	1.0
KEGG_DRUG_METABOLISM_CYTOCHROME_P450	0.32034278	0.8456109	0.7286013000000001	0.8684997	1.0
BIOCARTA_CK1_PATHWAY	-0.35189143	-0.91481143	0.5631970000000001	0.86862767	1.0
REACTOME_REGULATION_OF_PYRUVATE_DEHYDROGENASE_PDH_COMPLEX	-0.43642014	-0.91309434	0.6053719	0.8693036	1.0
REACTOME_SIGNALING_BY_TGF_BETA_RECEPTOR_COMPLEX	0.22605112	0.8279921999999998	0.70481926	0.86961395	1.0
BIOCARTA_AKT_PATHWAY	0.48750103	1.4420707	0.070281126	0.86973673	1.0
BIOCARTA_EPONFKB_PATHWAY	0.30316082	0.8300153	0.64299804	0.86976343	1.0
REACTOME_SIGNALING_BY_NOTCH1	0.24008676	0.82871276	0.73146296	0.87013835	1.0
REACTOME_KERATAN_SULFATE_BIOSYNTHESIS	0.6163	1.460712	0.052419352999999995	0.8702069	1.0
KEGG_TRYPTOPHAN_METABOLISM	0.31791002	0.83074784	0.7009709	0.8703538000000001	1.0
REACTOME_GABA_A_RECEPTOR_ACTIVATION	0.39515093	0.83252025	0.6780684	0.87082624	1.0
REACTOME_NEGATIVE_REGULATION_OF_FGFR_SIGNALING	-0.27428627	-0.9150335999999999	0.5420744000000001	0.8710049000000001	1.0
REACTOME_ADP_SIGNALLING_THROUGH_P2RY12	0.29820362	0.83102745	0.7080744999999999	0.87175095	1.0
BIOCARTA_BIOPEPTIDES_PATHWAY	0.24724735	0.8327056	0.6993865	0.8723359	1.0
REACTOME_CHYLOMICRON_MEDIATED_LIPID_TRANSPORT	0.5850018	1.4742723	0.052953158	0.8739193000000001	1.0
KEGG_ARACHIDONIC_ACID_METABOLISM	0.47611320000000007	1.4203466999999999	0.07014028	0.8753028	1.0
REACTOME_NCAM1_INTERACTIONS	0.3052913	0.7991241	0.7605634	0.8760814	1.0
REACTOME_TAK1_ACTIVATES_NFKB_BY_PHOSPHORYLATION_AND_ACTIVATION_OF_IKKS_COMPLEX	0.2640519	0.7979109000000001	0.73956263	0.8761704	1.0
BIOCARTA_AGPCR_PATHWAY	0.33003590000000005	0.7964048	0.71881604	0.87683123	1.0
REACTOME_SYNTHESIS_OF_PC	0.548347	1.4661803999999998	0.04696673	0.8783025999999999	1.0
BIOCARTA_TNFR2_PATHWAY	0.57908326	1.5258495	0.06370656	0.87864625	0.9990000000000001
REACTOME_CHONDROITIN_SULFATE_BIOSYNTHESIS	0.66021717	1.4626651000000002	0.06849315	0.8792085999999999	1.0
BIOCARTA_RELA_PATHWAY	0.47119036	1.4282944	0.08253359	0.8795972	1.0
REACTOME_TRANSPORT_TO_THE_GOLGI_AND_SUBSEQUENT_MODIFICATION	-0.30548063	-0.90623987	0.5708583	0.88057524	1.0
BIOCARTA_ATM_PATHWAY	0.27735502	0.7923068	0.7819253	0.88159317	1.0
KEGG_GLYCOSAMINOGLYCAN_DEGRADATION	-0.3134757	-0.90407914	0.54375	0.882266	1.0
BIOCARTA_ASBCELL_PATHWAY	0.34603032	0.7819505	0.71146244	0.88227534	1.0
BIOCARTA_AGR_PATHWAY	0.2360672	0.7828058000000001	0.82092553	0.8825799000000001	1.0
REACTOME_INCRETIN_SYNTHESIS_SECRETION_AND_INACTIVATION	0.30600196	0.7806738	0.8004114999999999	0.88258505	1.0
REACTOME_NEPHRIN_INTERACTIONS	0.54691356	1.4427524999999999	0.049800800000000006	0.8835004000000001	1.0
BIOCARTA_NO1_PATHWAY	-0.3158433	-0.9019424000000001	0.5601503999999999	0.88368696	1.0
REACTOME_POTASSIUM_CHANNELS	-0.26809946	-0.9003294	0.5684008	0.88399637	1.0
REACTOME_ACTIVATION_OF_CHAPERONE_GENES_BY_ATF6_ALPHA	0.31642416	0.7830004	0.72137403	0.88402843	1.0
BIOCARTA_LEPTIN_PATHWAY	0.33443052	0.78834337	0.7752101	0.88439	1.0
REACTOME_PRE_NOTCH_TRANSCRIPTION_AND_TRANSLATION	0.26783812	0.7871918999999999	0.7799228	0.8845453999999999	1.0
REACTOME_INWARDLY_RECTIFYING_K_CHANNELS	0.26405483	0.789099	0.7659999999999999	0.88490814	1.0
BIOCARTA_GH_PATHWAY	0.46960643	1.4243821	0.051759835	0.8849816999999999	1.0
REACTOME_SPRY_REGULATION_OF_FGF_SIGNALING	0.28616256	0.78342235	0.7715430999999999	0.8851103000000001	1.0
REACTOME_REGULATION_OF_AMPK_ACTIVITY_VIA_LKB1	0.26344976	0.7853876999999999	0.71760154	0.8855675999999999	1.0
REACTOME_PHOSPHOLIPASE_C_MEDIATED_CASCADE	0.22121754	0.78394586	0.8074398	0.88602895	1.0
REACTOME_DOWNREGULATION_OF_SMAD2_3_SMAD4_TRANSCRIPTIONAL_ACTIVITY	-0.3031271	-0.8980575999999999	0.59081835	0.8860918999999999	1.0
REACTOME_SIGNALING_BY_ERBB2	-0.20991775	-0.8285706	0.7883895000000001	0.88628364	1.0
REACTOME_TRANSPORT_OF_VITAMINS_NUCLEOSIDES_AND_RELATED_MOLECULES	-0.27804959999999995	-0.8339559999999999	0.7334669	0.8866235999999998	1.0
KEGG_VEGF_SIGNALING_PATHWAY	-0.21911234	-0.83494425	0.7583496999999999	0.88726485	1.0
KEGG_COMPLEMENT_AND_COAGULATION_CASCADES	0.5396209	1.4209174	0.06639839	0.8873648000000001	1.0
REACTOME_METABOLISM_OF_PROTEINS	-0.20119566	-0.8361546000000001	0.6843176999999999	0.8875337	1.0
REACTOME_INSULIN_SYNTHESIS_AND_PROCESSING	-0.39502459999999995	-0.8403413000000001	0.66322315	0.8875793	1.0
BIOCARTA_SET_PATHWAY	-0.42651135	-0.830226	0.65789473	0.8882123	1.0
BIOCARTA_ECM_PATHWAY	-0.2846494	-0.828794	0.68349516	0.8882757	1.0
REACTOME_OPSINS	-0.43491715	-0.8411988000000001	0.66799206	0.8885207	1.0
REACTOME_FGFR1_LIGAND_BINDING_AND_ACTIVATION	-0.30850047	-0.8187274999999999	0.6872428	0.8885299000000001	1.0
REACTOME_IONOTROPIC_ACTIVITY_OF_KAINATE_RECEPTORS	-0.34017852	-0.83144724	0.65225565	0.88857543	1.0
REACTOME_SYNTHESIS_OF_BILE_ACIDS_AND_BILE_SALTS_VIA_24_HYDROXYCHOLESTEROL	0.3888103	0.7752730999999999	0.77845526	0.8892027	1.0
REACTOME_INHIBITION_OF_VOLTAGE_GATED_CA2_CHANNELS_VIA_GBETA_GAMMA_SUBUNITS	-0.30823964	-0.86586505	0.6513944	0.88934463	1.0
REACTOME_FORMATION_OF_THE_HIV1_EARLY_ELONGATION_COMPLEX	-0.3205525	-0.8362553	0.632	0.8898049000000001	1.0
KEGG_NICOTINATE_AND_NICOTINAMIDE_METABOLISM	-0.34136307	-0.81660724	0.71311474	0.8898064	1.0
REACTOME_GROWTH_HORMONE_RECEPTOR_SIGNALING	0.5383340999999999	1.4294325	0.060240965	0.88982135	1.0
REACTOME_GRB2_SOS_PROVIDES_LINKAGE_TO_MAPK_SIGNALING_FOR_INTERGRINS_	-0.39416137	-0.8431112	0.68537074	0.8900571	1.0
BIOCARTA_NEUROTRANSMITTERS_PATHWAY	-0.47970447	-0.8220242	0.72073925	0.8902886000000001	1.0
KEGG_AMINOACYL_TRNA_BIOSYNTHESIS	-0.29680997	-0.83735955	0.6214575	0.8903568000000001	1.0
REACTOME_ENDOSOMAL_SORTING_COMPLEX_REQUIRED_FOR_TRANSPORT_ESCRT	-0.32439414	-0.8415372999999999	0.625498	0.8904736999999999	1.0
REACTOME_UNFOLDED_PROTEIN_RESPONSE	0.20583002	0.77333194	0.7840467	0.8905074000000001	1.0
REACTOME_MUSCLE_CONTRACTION	-0.33895335	-0.8246839	0.6544715	0.8906394	1.0
REACTOME_DEADENYLATION_OF_MRNA	-0.3151285	-0.8188418000000001	0.67820776	0.8907370000000001	1.0
KEGG_NON_SMALL_CELL_LUNG_CANCER	0.20474398	0.7720296	0.825	0.8907546000000001	1.0
REACTOME_INSULIN_RECEPTOR_RECYCLING	-0.31211522	-0.822994	0.6898608	0.89104223	1.0
REACTOME_MRNA_DECAY_BY_3_TO_5_EXORIBONUCLEASE	-0.41114384	-0.8661315	0.64705884	0.89148843	1.0
REACTOME_AMINE_DERIVED_HORMONES	-0.40567595	-0.84806645	0.6799163	0.8915004000000001	1.0
REACTOME_IRON_UPTAKE_AND_TRANSPORT	-0.3137143	-0.8463878	0.6803119000000001	0.89190674	1.0
REACTOME_PRE_NOTCH_PROCESSING_IN_GOLGI	-0.2975987	-0.84472346	0.6535433	0.8922453000000001	1.0
REACTOME_P130CAS_LINKAGE_TO_MAPK_SIGNALING_FOR_INTEGRINS	-0.40281343	-0.8431339	0.67676765	0.89254916	1.0
REACTOME_DARPP_32_EVENTS	-0.31569767	-0.8487482	0.66015625	0.89283705	1.0
KEGG_PATHOGENIC_ESCHERICHIA_COLI_INFECTION	-0.26669699999999996	-0.8500377	0.6541501999999999	0.89300644	1.0
BIOCARTA_CARM_ER_PATHWAY	-0.24585549999999998	-0.8189058000000001	0.7237569	0.89304334	1.0
BIOCARTA_IGF1MTOR_PATHWAY	0.31450915	0.76921326	0.78137654	0.8932283000000001	1.0
REACTOME_CLASS_B_2_SECRETIN_FAMILY_RECEPTORS	0.22601100000000002	0.7678604	0.8644400999999999	0.8935280999999999	1.0
BIOCARTA_MCALPAIN_PATHWAY	-0.32744485	-0.86639214	0.6744639	0.89370847	1.0
REACTOME_SIGNALING_BY_FGFR	-0.19296768	-0.81259346	0.81496066	0.89432216	1.0
REACTOME_NFKB_IS_ACTIVATED_AND_SIGNALS_SURVIVAL	0.5348108	1.5282902	0.06916996	0.894407	0.9990000000000001
KEGG_SMALL_CELL_LUNG_CANCER	-0.22764847	-0.8618628	0.6967871	0.89461786	1.0
KEGG_HEDGEHOG_SIGNALING_PATHWAY	0.45171009999999995	1.4744153	0.03526971	0.8946763000000001	1.0
REACTOME_SIGNALING_BY_ACTIVATED_POINT_MUTANTS_OF_FGFR1	-0.35462899999999997	-0.89255804	0.5885946999999999	0.8946875	1.0
REACTOME_INFLUENZA_VIRAL_RNA_TRANSCRIPTION_AND_REPLICATION	-0.23426655	-0.85190743	0.57392997	0.8947275	1.0
REACTOME_RNA_POL_II_TRANSCRIPTION_PRE_INITIATION_AND_PROMOTER_OPENING	-0.29398865	-0.8505059000000001	0.6347305	0.89475995	1.0
REACTOME_PKB_MEDIATED_EVENTS	-0.22154751	-0.80770814	0.76982594	0.89522725	1.0
KEGG_NITROGEN_METABOLISM	-0.33175904	-0.85304815	0.6666667	0.89532804	1.0
BIOCARTA_INTEGRIN_PATHWAY	0.23641685	0.76497155	0.7625	0.8960054000000001	1.0
REACTOME_NONSENSE_MEDIATED_DECAY_ENHANCED_BY_THE_EXON_JUNCTION_COMPLEX	-0.21738464	-0.8664509	0.5760649	0.8962795	1.0
KEGG_RIG_I_LIKE_RECEPTOR_SIGNALING_PATHWAY	-0.23784667	-0.8078746	0.7330595	0.89735806	1.0
REACTOME_THROMBOXANE_SIGNALLING_THROUGH_TP_RECEPTOR	0.48510656	1.431054	0.08	0.8974048000000001	1.0
REACTOME_SIGNALING_BY_SCF_KIT	-0.24760678	-0.8546937	0.7025948000000001	0.89755845	1.0
REACTOME_PEPTIDE_HORMONE_BIOSYNTHESIS	-0.4324482	-0.8530502000000001	0.65531063	0.8979459999999999	1.0
REACTOME_ELEVATION_OF_CYTOSOLIC_CA2_LEVELS	-0.34009275	-0.8087988	0.6815287	0.89820623	1.0
REACTOME_ZINC_TRANSPORTERS	-0.38175097	-0.8665726	0.67075664	0.8987295	1.0
REACTOME_OXYGEN_DEPENDENT_PROLINE_HYDROXYLATION_OF_HYPOXIA_INDUCIBLE_FACTOR_ALPHA	-0.32200056	-0.8688431000000001	0.6456212	0.8996430000000001	1.0
REACTOME_TRANSLATION	-0.23890607	-0.85491455	0.5966736	0.8997763000000001	1.0
KEGG_LYSINE_DEGRADATION	-0.23735766	-0.79503715	0.790099	0.9001964	1.0
KEGG_PANCREATIC_CANCER	-0.22732201	-0.8668627	0.6930693	0.90086484	1.0
BIOCARTA_SALMONELLA_PATHWAY	-0.3841908	-0.8880263	0.6214575	0.90096194	1.0
BIOCARTA_P53HYPOXIA_PATHWAY	-0.2889216	-0.8029797	0.7373736999999999	0.9011435999999999	1.0
KEGG_GLYCOLYSIS_GLUCONEOGENESIS	0.24116184	0.7589965	0.8020202	0.9011923000000001	1.0
REACTOME_TRANSFERRIN_ENDOCYTOSIS_AND_RECYCLING	-0.33926493	-0.8850481	0.61122245	0.90138286	1.0
REACTOME_SIGNALING_BY_FGFR1_MUTANTS	-0.27895856	-0.86932456	0.6494024	0.90145916	1.0
BIOCARTA_CDC42RAC_PATHWAY	0.30973265	0.7561241	0.7610442	0.90195215	1.0
REACTOME_DIABETES_PATHWAYS	0.2033866	0.7572514	0.8973843	0.9020902	1.0
REACTOME_NEGATIVE_REGULATORS_OF_RIG_I_MDA5_SIGNALING	-0.33575118	-0.79528606	0.69341564	0.90215	1.0
REACTOME_TRANS_GOLGI_NETWORK_VESICLE_BUDDING	0.23494847	0.75948834	0.74556214	0.90225035	1.0
KEGG_ALZHEIMERS_DISEASE	-0.24020766	-0.8549197000000001	0.62823063	0.9024196	1.0
REACTOME_RNA_POL_III_TRANSCRIPTION_INITIATION_FROM_TYPE_2_PROMOTER	-0.36917487	-0.8858886	0.6056911	0.90243876	1.0
REACTOME_GENERIC_TRANSCRIPTION_PATHWAY	0.18587358	0.75446606	0.83092785	0.9025671999999999	1.0
BIOCARTA_IL10_PATHWAY	-0.36952670000000004	-0.8743205	0.6585366	0.9026089	1.0
REACTOME_PYRUVATE_METABOLISM	-0.38119453	-0.87261796	0.61885244	0.90305793	1.0
BIOCARTA_ACTINY_PATHWAY	-0.35201222	-0.8559534	0.6464844	0.9030898999999999	1.0
REACTOME_NUCLEOTIDE_BINDING_DOMAIN_LEUCINE_RICH_REPEAT_CONTAINING_RECEPTOR_NLR_SIGNALING_PATHWAYS	0.25148234	0.75164646	0.75247526	0.9031169	1.0
KEGG_SPLICEOSOME	-0.28048277	-0.8811313000000001	0.5814889	0.9031275	1.0
REACTOME_DOWNSTREAM_SIGNALING_OF_ACTIVATED_FGFR	-0.21291323	-0.86976993	0.71626985	0.90336823	1.0
REACTOME_MRNA_CAPPING	-0.32553685	-0.87669677	0.6047904000000001	0.9033690000000001	1.0
REACTOME_BASE_FREE_SUGAR_PHOSPHATE_REMOVAL_VIA_THE_SINGLE_NUCLEOTIDE_REPLACEMENT_PATHWAY	0.32226455	0.7523978	0.78125	0.9036403000000001	1.0
KEGG_RIBOSOME	-0.27088806	-0.8779639000000001	0.5502958	0.90370226	1.0
REACTOME_DOWNSTREAM_SIGNALING_EVENTS_OF_B_CELL_RECEPTOR_BCR	-0.28740959999999993	-0.8823323000000001	0.56378603	0.9037478000000001	1.0
REACTOME_ACTIVATED_TAK1_MEDIATES_P38_MAPK_ACTIVATION	-0.2761778	-0.78540546	0.72289157	0.9041045	1.0
REACTOME_TERMINATION_OF_O_GLYCAN_BIOSYNTHESIS	-0.39380148	-0.87485343	0.6334661	0.90434307	1.0
REACTOME_RNA_POL_II_PRE_TRANSCRIPTION_EVENTS	-0.2594554	-0.7953126	0.6828283	0.90447015	1.0
REACTOME_SIGNALING_BY_FGFR_IN_DISEASE	-0.20598191	-0.87044644	0.7176471	0.9046166999999999	1.0
REACTOME_ORGANIC_CATION_ANION_ZWITTERION_TRANSPORT	0.32629	0.7489851	0.7456979	0.9050473	1.0
REACTOME_REGULATION_OF_GENE_EXPRESSION_IN_BETA_CELLS	-0.31368396	-0.8784966999999999	0.61821705	0.9055139000000001	1.0
REACTOME_ANTIGEN_PRESENTATION_FOLDING_ASSEMBLY_AND_PEPTIDE_LOADING_OF_CLASS_I_MHC	-0.32390594	-0.79579145	0.66527194	0.90594727	1.0
REACTOME_FORMATION_OF_RNA_POL_II_ELONGATION_COMPLEX_	-0.27648264	-0.78550386	0.6826346999999999	0.90629256	1.0
REACTOME_APOPTOTIC_EXECUTION_PHASE	-0.24868084	-0.78247696	0.8414872999999999	0.90642893	1.0
REACTOME_NCAM_SIGNALING_FOR_NEURITE_OUT_GROWTH	-0.24065928	-0.78650993	0.80078125	0.9070790000000001	1.0
REACTOME_FATTY_ACYL_COA_BIOSYNTHESIS	-0.34109485	-0.79789543	0.7495183000000001	0.90714854	1.0
BIOCARTA_COMP_PATHWAY	0.71551645	1.475811	0.06809338	0.90793425	1.0
KEGG_OLFACTORY_TRANSDUCTION	-0.28474590000000005	-0.7959161	0.6965376999999999	0.90810347	1.0
REACTOME_L1CAM_INTERACTIONS	-0.19557719	-0.7869599	0.8510242	0.9086976999999999	1.0
REACTOME_VOLTAGE_GATED_POTASSIUM_CHANNELS	0.24565825	0.74504346	0.765748	0.9088642	1.0
REACTOME_TRANSMEMBRANE_TRANSPORT_OF_SMALL_MOLECULES	-0.18344459	-0.78815806	0.94274026	0.9090988999999999	1.0
REACTOME_DOPAMINE_NEUROTRANSMITTER_RELEASE_CYCLE	-0.3905573	-0.7755959	0.748538	0.9104783000000001	1.0
REACTOME_SIGNALING_BY_FGFR3_MUTANTS	-0.3147259	-0.7767198000000001	0.77103716	0.91105336	1.0
KEGG_GLYCOSPHINGOLIPID_BIOSYNTHESIS_GLOBO_SERIES	-0.30662206	-0.7779326999999999	0.7821781999999999	0.9113346	1.0
REACTOME_ADAPTIVE_IMMUNE_SYSTEM	-0.22146639999999998	-0.7735675	0.7346939	0.9115179	1.0
REACTOME_MAPK_TARGETS_NUCLEAR_EVENTS_MEDIATED_BY_MAP_KINASES	0.56653553	1.5356839	0.040816326	0.9116382	0.998
REACTOME_DOWNSTREAM_SIGNAL_TRANSDUCTION	0.1874774	0.7412591	0.9178645000000001	0.91257256	1.0
REACTOME_SIGNAL_TRANSDUCTION_BY_L1	0.2129099	0.73969656	0.8478701999999999	0.9129564	1.0
REACTOME_IL_2_SIGNALING	0.24729678	0.7333149999999999	0.75449103	0.9132011	1.0
REACTOME_TRAF3_DEPENDENT_IRF_ACTIVATION_PATHWAY	-0.33281374	-0.7690038	0.7299578	0.91413903	1.0
REACTOME_ACTIVATION_OF_THE_MRNA_UPON_BINDING_OF_THE_CAP_BINDING_COMPLEX_AND_EIFS_AND_SUBSEQUENT_BINDING_TO_43S	-0.23678689	-0.75665635	0.67611337	0.9145816999999999	1.0
REACTOME_CHEMOKINE_RECEPTORS_BIND_CHEMOKINES	0.33554184	0.73352593	0.76045626	0.91465247	1.0
REACTOME_ASPARAGINE_N_LINKED_GLYCOSYLATION	0.22474907	0.73068184	0.78926444	0.91490465	1.0
BIOCARTA_NKT_PATHWAY	0.29038358	0.7342893	0.7419355	0.91524535	1.0
REACTOME_ABORTIVE_ELONGATION_OF_HIV1_TRANSCRIPT_IN_THE_ABSENCE_OF_TAT	-0.29690775	-0.7591008	0.70481926	0.91554564	1.0
BIOCARTA_CDK5_PATHWAY	0.27989733	0.73616683	0.8326848	0.9160725000000001	1.0
REACTOME_GLUTAMATE_NEUROTRANSMITTER_RELEASE_CYCLE	-0.33330005	-0.757112	0.7968441999999999	0.91617334	1.0
KEGG_PHENYLALANINE_METABOLISM	-0.33052993	-0.7691039000000001	0.7747934	0.9163286	1.0
REACTOME_SPHINGOLIPID_DE_NOVO_BIOSYNTHESIS	0.27394608	0.73435116	0.8404669	0.9168818999999999	1.0
REACTOME_SYNTHESIS_SECRETION_AND_INACTIVATION_OF_GIP	-0.3569991	-0.75960124	0.779798	0.91710573	1.0
REACTOME_REGULATION_OF_BETA_CELL_DEVELOPMENT	-0.25595972	-0.7596668000000001	0.7796935	0.9192869	1.0
REACTOME_INTEGRIN_ALPHAIIB_BETA3_SIGNALING	-0.28664288	-0.75998306	0.78926444	0.92111075	1.0
KEGG_ARGININE_AND_PROLINE_METABOLISM	-0.25046992	-0.7615259	0.8707071	0.92113614	1.0
REACTOME_CYTOKINE_SIGNALING_IN_IMMUNE_SYSTEM	-0.23587020000000003	-0.7628094	0.7412008000000001	0.92151845	1.0
REACTOME_ACTIVATION_OF_RAC	0.29013908	0.72103095	0.8682635000000001	0.92217076	1.0
REACTOME_POST_TRANSLATIONAL_PROTEIN_MODIFICATION	0.19563101	0.7234181	0.90643275	0.9225721	1.0
REACTOME_ELONGATION_ARREST_AND_RECOVERY	-0.26578557	-0.7428291	0.7353535	0.9231459999999999	1.0
REACTOME_NA_CL_DEPENDENT_NEUROTRANSMITTER_TRANSPORTERS	-0.31911406	-0.7410734	0.79296064	0.92342687	1.0
REACTOME_ACTIVATION_OF_GENES_BY_ATF4	-0.2542313	-0.74420065	0.82388663	0.92350763	1.0
BIOCARTA_TRKA_PATHWAY	0.28561333	0.7212229	0.8628691999999999	0.92370343	1.0
REACTOME_ACYL_CHAIN_REMODELLING_OF_PI	-0.3194823	-0.7446813	0.8355640999999999	0.9251425999999999	1.0
REACTOME_KERATAN_SULFATE_KERATIN_METABOLISM	0.60382986	1.5287086	0.031558186	0.92539096	0.9990000000000001
KEGG_REGULATION_OF_AUTOPHAGY	-0.2601733	-0.7474242	0.76171875	0.9257434000000001	1.0
REACTOME_PEPTIDE_CHAIN_ELONGATION	-0.22412255	-0.74565846	0.666004	0.9259491	1.0
BIOCARTA_EPHA4_PATHWAY	-0.34062946	-0.73409677	0.78367347	0.92645574	1.0
REACTOME_FACILITATIVE_NA_INDEPENDENT_GLUCOSE_TRANSPORTERS	0.3002316	0.7081729999999999	0.82024795	0.9266221	1.0
BIOCARTA_SPRY_PATHWAY	0.25741017	0.7094142	0.8562992	0.9266612	1.0
REACTOME_AMINE_COMPOUND_SLC_TRANSPORTERS	0.2765333	0.7144130999999999	0.8549323	0.92720366	1.0
REACTOME_IMMUNE_SYSTEM	-0.20188628	-0.73678553	0.8012048	0.92731225	1.0
REACTOME_TRANSCRIPTIONAL_ACTIVITY_OF_SMAD2_SMAD3_SMAD4_HETEROTRIMER	0.22479014	0.70600045	0.8817635	0.9276474	1.0
KEGG_TERPENOID_BACKBONE_BIOSYNTHESIS	0.32872248	0.71540004	0.8103448000000001	0.9276653	1.0
REACTOME_PLC_BETA_MEDIATED_EVENTS	0.22957705	0.7125758000000001	0.8978261000000001	0.9279216	1.0
REACTOME_SIGNAL_REGULATORY_PROTEIN_SIRP_FAMILY_INTERACTIONS	0.31387729999999997	0.70972925	0.7556008000000001	0.92801446	1.0
REACTOME_METABOLISM_OF_VITAMINS_AND_COFACTORS	-0.24175186	-0.734119	0.8528826999999999	0.9286843000000001	1.0
REACTOME_PRESYNAPTIC_NICOTINIC_ACETYLCHOLINE_RECEPTORS	0.27240549999999997	0.71026903	0.822736	0.92916244	1.0
REACTOME_ACYL_CHAIN_REMODELLING_OF_PE	-0.28115433	-0.7233693	0.86534655	0.9294533000000001	1.0
BIOCARTA_INTRINSIC_PATHWAY	0.29469594	0.7028585	0.8585086	0.9297542	1.0
BIOCARTA_MTOR_PATHWAY	-0.24424852	-0.7277551	0.84675837	0.9304347	1.0
REACTOME_TRIGLYCERIDE_BIOSYNTHESIS	-0.26175052	-0.72597754	0.86627907	0.93047076	1.0
KEGG_AUTOIMMUNE_THYROID_DISEASE	0.29659036	0.700491	0.78313255	0.93092155	1.0
REACTOME_3_UTR_MEDIATED_TRANSLATIONAL_REGULATION	-0.21322407	-0.7237764	0.67070705	0.93114656	1.0
BIOCARTA_NFAT_PATHWAY	-0.22299762	-0.72809684	0.90485436	0.932233	1.0
REACTOME_IRAK2_MEDIATED_ACTIVATION_OF_TAK1_COMPLEX_UPON_TLR7_8_OR_9_STIMULATION	0.3035542	0.69487655	0.8255578000000001	0.93237925	1.0
REACTOME_PASSIVE_TRANSPORT_BY_AQUAPORINS	0.3129451	0.69770783	0.8540000000000001	0.93252504	1.0
REACTOME_NOTCH1_INTRACELLULAR_DOMAIN_REGULATES_TRANSCRIPTION	0.2176086	0.69557446	0.87396693	0.9333021	1.0
REACTOME_TRAF6_MEDIATED_IRF7_ACTIVATION	-0.27879349999999997	-0.7164666000000001	0.8058455	0.9338818999999999	1.0
KEGG_PORPHYRIN_AND_CHLOROPHYLL_METABOLISM	-0.29103732	-0.71753544	0.86417323	0.93474686	1.0
REACTOME_MEMBRANE_BINDING_AND_TARGETTING_OF_GAG_PROTEINS	0.27851352	0.6844180000000001	0.87134504	0.9393645	1.0
KEGG_INSULIN_SIGNALING_PATHWAY	0.16380160000000002	0.6848491	0.985138	0.94054127	1.0
KEGG_AMYOTROPHIC_LATERAL_SCLEROSIS_ALS	0.19662009	0.6850148	0.91463417	0.9420947000000001	1.0
REACTOME_RIG_I_MDA5_MEDIATED_INDUCTION_OF_IFN_ALPHA_BETA_PATHWAYS	-0.20965804	-0.7045805	0.8453608	0.94638485	1.0
REACTOME_NUCLEAR_SIGNALING_BY_ERBB4	0.5262978	1.5357641000000002	0.017716536	0.94909847	0.998
REACTOME_SPHINGOLIPID_METABOLISM	0.20477313	0.66896933	0.9435798000000001	0.95100236	1.0
REACTOME_PEROXISOMAL_LIPID_METABOLISM	-0.30543923	-0.68364555	0.88	0.9514583000000001	1.0
BIOCARTA_CTLA4_PATHWAY	0.3248871	0.66491735	0.79527557	0.951644	1.0
BIOCARTA_IGF1R_PATHWAY	0.26065767	0.66999215	0.9269311	0.9516885	1.0
BIOCARTA_ERK_PATHWAY	0.18220818	0.66308206	0.9288618000000001	0.95172733	1.0
REACTOME_NEUROTRANSMITTER_RELEASE_CYCLE	0.26790574	0.6714739000000001	0.90039843	0.95181024	1.0
REACTOME_LATENT_INFECTION_OF_HOMO_SAPIENS_WITH_MYCOBACTERIUM_TUBERCULOSIS	0.2626338	0.6653299	0.8683128000000001	0.9529301	1.0
REACTOME_TIGHT_JUNCTION_INTERACTIONS	-0.2495859	-0.6803606	0.8787275999999999	0.9530597	1.0
BIOCARTA_MTA3_PATHWAY	-0.2860208	-0.6841111	0.89906543	0.95318943	1.0
REACTOME_OLFACTORY_SIGNALING_PATHWAY	-0.27801752	-0.689756	0.7634854999999999	0.9533531999999999	1.0
BIOCARTA_FEEDER_PATHWAY	-0.29167074	-0.6873206999999999	0.8213591999999998	0.9540034	1.0
REACTOME_SIGNALING_BY_FGFR1_FUSION_MUTANTS	-0.2624553	-0.6927871999999999	0.8709056000000001	0.9542993000000001	1.0
KEGG_ETHER_LIPID_METABOLISM	-0.2578298	-0.69468236	0.8959538	0.95434785	1.0
REACTOME_SYNTHESIS_OF_VERY_LONG_CHAIN_FATTY_ACYL_COAS	-0.31909147	-0.6842708000000001	0.8988326999999999	0.95525163	1.0
KEGG_DRUG_METABOLISM_OTHER_ENZYMES	-0.25046232	-0.6899611	0.93762994	0.9553286	1.0
REACTOME_PLATELET_AGGREGATION_PLUG_FORMATION	-0.22960395	-0.6956318	0.85631067	0.9554064	1.0
BIOCARTA_EIF_PATHWAY	-0.27652922	-0.66898245	0.8313492	0.9589837	1.0
REACTOME_PURINE_CATABOLISM	-0.3466832	-0.66197896	0.8808594000000001	0.9594466	1.0
KEGG_PENTOSE_PHOSPHATE_PATHWAY	-0.26393130000000004	-0.6639406	0.8886555	0.9597190000000001	1.0
REACTOME_TGF_BETA_RECEPTOR_SIGNALING_ACTIVATES_SMADS	-0.20224716	-0.66580015	0.9082030999999999	0.9600200999999999	1.0
REACTOME_PERK_REGULATED_GENE_EXPRESSION	-0.22213407	-0.6717688	0.8979591999999998	0.9604145000000001	1.0
REACTOME_ENDOSOMAL_VACUOLAR_PATHWAY	-0.37455148	-0.6693758000000001	0.8011928	0.96076775	1.0
BIOCARTA_PTDINS_PATHWAY	-0.21505542	-0.6297145000000001	0.9389764000000002	0.96090925	1.0
BIOCARTA_FREE_PATHWAY	-0.23784745	-0.62640667	0.90554416	0.96148014	1.0
REACTOME_INTERFERON_GAMMA_SIGNALING	-0.26331344	-0.63023925	0.83739835	0.96262395	1.0
BIOCARTA_CFTR_PATHWAY	-0.29805395	-0.6561695	0.88425046	0.9629148999999999	1.0
REACTOME_FORMATION_OF_TRANSCRIPTION_COUPLED_NER_TC_NER_REPAIR_COMPLEX	-0.22351538	-0.6308334	0.89387757	0.9642658000000002	1.0
REACTOME_TRANSPORT_OF_ORGANIC_ANIONS	-0.28400096	-0.6196691	0.9066936999999999	0.9647829	1.0
REACTOME_TRAF6_MEDIATED_IRF7_ACTIVATION_IN_TLR7_8_OR_9_SIGNALING	-0.2851072	-0.6319566999999999	0.88438135	0.9654905	1.0
REACTOME_COPI_MEDIATED_TRANSPORT	0.2679864	0.6277100999999999	0.8390341999999998	0.96549183	1.0
BIOCARTA_BARRESTIN_SRC_PATHWAY	-0.22174905	-0.61440104	0.90960455	0.9666607	1.0
REACTOME_VITAMIN_B5_PANTOTHENATE_METABOLISM	0.24602394	0.6220154	0.902	0.9667321	1.0
REACTOME_NOD1_2_SIGNALING_PATHWAY	0.22847044	0.62396705	0.86206895	0.96690524	1.0
KEGG_GLYCOSPHINGOLIPID_BIOSYNTHESIS_LACTO_AND_NEOLACTO_SERIES	0.21830373	0.62789935	0.8962075999999999	0.9670049000000001	1.0
REACTOME_GLYCOGEN_BREAKDOWN_GLYCOGENOLYSIS	-0.27282414	-0.63243437	0.9291497999999999	0.9673042	1.0
KEGG_STEROID_HORMONE_BIOSYNTHESIS	-0.22843426	-0.6105824000000001	0.97125256	0.9674478000000001	1.0
KEGG_GLYCOSPHINGOLIPID_BIOSYNTHESIS_GANGLIO_SERIES	-0.28845188	-0.63383913	0.9114688	0.9681966000000001	1.0
KEGG_SPHINGOLIPID_METABOLISM	0.21618372	0.6281318	0.95482546	0.96850115	1.0
REACTOME_RETROGRADE_NEUROTROPHIN_SIGNALLING	0.22248845	0.6296994	0.88957053	0.9687919	1.0
REACTOME_APOPTOTIC_CLEAVAGE_OF_CELL_ADHESION_PROTEINS	-0.29386586	-0.6057591	0.9429134	0.96885765	1.0
REACTOME_SMAD2_SMAD3_SMAD4_HETEROTRIMER_REGULATES_TRANSCRIPTION	-0.22059226	-0.6348425999999999	0.9288618000000001	0.96949214	1.0
REACTOME_TRANSPORT_OF_GLUCOSE_AND_OTHER_SUGARS_BILE_SALTS_AND_ORGANIC_ACIDS_METAL_IONS_AND_AMINE_COMPOUNDS	0.19170304	0.63072413	0.97628456	0.9696379	1.0
KEGG_GLYCOSYLPHOSPHATIDYLINOSITOL_GPI_ANCHOR_BIOSYNTHESIS	0.24257952	0.6425831	0.8802521000000001	0.9697014000000002	1.0
REACTOME_ABCA_TRANSPORTERS_IN_LIPID_HOMEOSTASIS	0.2575536	0.6342687	0.92814374	0.9700479	1.0
REACTOME_XENOBIOTICS	-0.25792187	-0.5664501999999999	0.9129511999999999	0.9702772	1.0
BIOCARTA_CHREBP2_PATHWAY	0.17370529999999998	0.6318335999999999	0.9446720999999999	0.9704116	1.0
KEGG_METABOLISM_OF_XENOBIOTICS_BY_CYTOCHROME_P450	0.24002379999999998	0.63538367	0.96844184	0.9708870999999999	1.0
BIOCARTA_IL17_PATHWAY	0.3082415	0.61458975	0.8541267	0.97090054	1.0
REACTOME_DOWNREGULATION_OF_TGF_BETA_RECEPTOR_SIGNALING	-0.19849479	-0.63820547	0.94095236	0.9709309000000002	1.0
REACTOME_PHASE_II_CONJUGATION	-0.20896869999999998	-0.6354122	0.9758065	0.9711749	1.0
KEGG_PEROXISOME	-0.18881056	-0.59559107	0.99019605	0.9715205	1.0
BIOCARTA_SPPA_PATHWAY	-0.20701	-0.56775165	0.96037734	0.9716493	1.0
KEGG_PRIMARY_IMMUNODEFICIENCY	-0.29047270000000003	-0.6445935	0.76386034	0.9717150999999999	1.0
REACTOME_LYSOSOME_VESICLE_BIOGENESIS	0.22256497	0.63825727	0.9078431	0.9718393	1.0
REACTOME_ACYL_CHAIN_REMODELLING_OF_PS	0.26680159999999997	0.6359883000000001	0.92210525	0.9721185999999999	1.0
REACTOME_REVERSIBLE_HYDRATION_OF_CARBON_DIOXIDE	-0.26035303	-0.5810763000000001	0.9764706	0.9722970999999999	1.0
REACTOME_ACETYLCHOLINE_NEUROTRANSMITTER_RELEASE_CYCLE	-0.32194263	-0.6384254	0.9186046999999998	0.9729380999999999	1.0
REACTOME_SYNTHESIS_SECRETION_AND_DEACYLATION_OF_GHRELIN	-0.29452702	-0.58314544	0.97510374	0.9732407	1.0
BIOCARTA_NGF_PATHWAY	0.5704524000000001	1.5379151000000002	0.041015625	0.9732786	0.998
BIOCARTA_RHO_PATHWAY	-0.16496733	-0.5684836	0.946	0.97335213	1.0
REACTOME_SYNTHESIS_OF_BILE_ACIDS_AND_BILE_SALTS_VIA_7ALPHA_HYDROXYCHOLESTEROL	-0.28103718	-0.59563816	0.9246436	0.97361696	1.0
REACTOME_SIGNALING_BY_THE_B_CELL_RECEPTOR_BCR	-0.18481418	-0.5850085	0.9232323	0.97421235	1.0
KEGG_SELENOAMINO_ACID_METABOLISM	-0.23052944	-0.6393229	0.9346939000000001	0.9743221	1.0
KEGG_PENTOSE_AND_GLUCURONATE_INTERCONVERSIONS	0.29482195	0.6077560000000001	0.9466403	0.9744468000000001	1.0
REACTOME_CYTOSOLIC_SULFONATION_OF_SMALL_MOLECULES	-0.21768427	-0.53013444	0.96428573	0.974772	1.0
KEGG_ANTIGEN_PROCESSING_AND_PRESENTATION	-0.20172846	-0.56863976	0.92168677	0.9753722	1.0
REACTOME_ACTIVATED_AMPK_STIMULATES_FATTY_ACID_OXIDATION_IN_MUSCLE	-0.1866098	-0.53298026	0.9688716	0.97563773	1.0
REACTOME_FORMATION_OF_THE_TERNARY_COMPLEX_AND_SUBSEQUENTLY_THE_43S_COMPLEX	-0.1839468	-0.5506833999999999	0.8484849	0.976233	1.0
KEGG_TAURINE_AND_HYPOTAURINE_METABOLISM	-0.31601083	-0.5851801	0.95473254	0.97623837	1.0
BIOCARTA_PARKIN_PATHWAY	-0.22791226	-0.5356833000000001	0.9693251	0.9765938	1.0
KEGG_TYROSINE_METABOLISM	-0.20198466	-0.56974226	0.9940000000000001	0.97687304	1.0
REACTOME_REGULATION_OF_IFNA_SIGNALING	0.24077167	0.6012503	0.8801572	0.97757316	1.0
BIOCARTA_EIF2_PATHWAY	-0.25890586	-0.54249126	0.9512195	0.9778891	1.0
BIOCARTA_IGF1_PATHWAY	0.6362749	1.5486248	0.018181818	0.9779155999999999	0.997
KEGG_CYTOSOLIC_DNA_SENSING_PATHWAY	0.21280462	0.597649	0.9635316999999999	0.9783671	1.0
REACTOME_CTNNB1_PHOSPHORYLATION_CASCADE	-0.18223874	-0.5360833	0.9776876	0.9785648000000001	1.0
REACTOME_DSCAM_INTERACTIONS	0.24981107	0.59348017	0.9269311	0.9792889000000001	1.0
KEGG_STARCH_AND_SUCROSE_METABOLISM	-0.19368127	-0.5124781	0.9979674999999999	0.9795181000000001	1.0
BIOCARTA_PTEN_PATHWAY	0.20397054	0.5684868000000001	0.9678715	0.98086613	1.0
REACTOME_THE_ROLE_OF_NEF_IN_HIV1_REPLICATION_AND_DISEASE_PATHOGENESIS	0.22704057	0.5692413000000001	0.9048583	0.98211443	1.0
REACTOME_FORMATION_OF_INCISION_COMPLEX_IN_GG_NER	0.22363879	0.5864109000000001	0.9209485999999999	0.9821996999999999	1.0
BIOCARTA_CASPASE_PATHWAY	0.23962577	0.58324647	0.9127907	0.9825091	1.0
REACTOME_ACTIVATION_OF_CHAPERONES_BY_ATF6_ALPHA	0.21922398	0.57022434	0.9326923	0.9832414	1.0
BIOCARTA_VITCB_PATHWAY	0.28327972	0.57303476	0.9255533000000001	0.98345083	1.0
REACTOME_REGULATION_OF_RHEB_GTPASE_ACTIVITY_BY_AMPK	0.19964845	0.53959066	0.979716	0.98364896	1.0
KEGG_NOD_LIKE_RECEPTOR_SIGNALING_PATHWAY	0.20168974	0.57379997	0.9784735999999999	0.9846965	1.0
KEGG_RIBOFLAVIN_METABOLISM	0.20292879999999996	0.5443043000000001	0.972549	0.9847521	1.0
BIOCARTA_NUCLEARRS_PATHWAY	0.21942571	0.5764656	0.93869734	0.98484814	1.0
REACTOME_ROLE_OF_DCC_IN_REGULATING_APOPTOSIS	0.21831748	0.54736793	0.9669903	0.9849555	1.0
REACTOME_METABOLISM_OF_PORPHYRINS	0.23634607	0.5573956	0.92727274	0.9851037	1.0
REACTOME_N_GLYCAN_TRIMMING_IN_THE_ER_AND_CALNEXIN_CALRETICULIN_CYCLE	0.21674138	0.5397318	0.93921566	0.98525375	1.0
KEGG_LINOLEIC_ACID_METABOLISM	-0.19393454	-0.48668537	0.9868667999999999	0.9856108	1.0
BIOCARTA_AKAP13_PATHWAY	0.23606537	0.5530076	0.9570552	0.9856744000000001	1.0
BIOCARTA_AHSP_PATHWAY	0.23579635	0.5487019000000001	0.96588486	0.985985	1.0
REACTOME_HDL_MEDIATED_LIPID_TRANSPORT	-0.17925896	-0.46812929999999997	0.9904761999999999	0.9860828000000001	1.0
REACTOME_GOLGI_ASSOCIATED_VESICLE_BIOGENESIS	-0.14572075	-0.47266093	0.9865643	0.9870768	1.0
BIOCARTA_PLCE_PATHWAY	0.22123109	0.52155924	0.95974576	0.98785436	1.0
BIOCARTA_PS1_PATHWAY	0.19036998	0.52470773	0.97633135	0.9882779	1.0
BIOCARTA_NO2IL12_PATHWAY	0.24615645	0.5055885	0.9121094000000001	0.9919941999999999	1.0
BIOCARTA_CARM1_PATHWAY	0.20861523	0.48947188	0.9853556999999998	0.9952839	1.0
REACTOME_JNK_C_JUN_KINASES_PHOSPHORYLATION_AND_ACTIVATION_MEDIATED_BY_ACTIVATED_HUMAN_TAK1	0.1368684	0.39098346	1.0	0.99682343	1.0
KEGG_AMINO_SUGAR_AND_NUCLEOTIDE_SUGAR_METABOLISM	0.15359755	0.39898124	1.0	0.99788177	1.0
BIOCARTA_CREB_PATHWAY	0.16503003	0.46927252	0.9978992	0.99884164	1.0
BIOCARTA_MITOCHONDRIA_PATHWAY	0.15603370000000003	0.40527922	1.0	0.99898577	1.0
REACTOME_ERK_MAPK_TARGETS	0.61337394	1.6515047999999999	0.019027485	1.0	0.937
REACTOME_GAP_JUNCTION_DEGRADATION	0.7487739000000001	1.629434	0.01	1.0	0.958
BIOCARTA_MYOSIN_PATHWAY	0.49249563	1.6746161	0.00811359	1.0	0.897
BIOCARTA_KERATINOCYTE_PATHWAY	0.49054432	1.5924329	0.011764706000000002	1.0	0.985
KEGG_CIRCADIAN_RHYTHM_MAMMAL	0.72705984	1.692347	0.011406845	1.0	0.85
KEGG_NOTCH_SIGNALING_PATHWAY	0.45543492	1.628902	0.024	1.0	0.958
REACTOME_EICOSANOID_LIGAND_BINDING_RECEPTORS	0.5959819000000001	1.6061678999999998	0.024948025	1.0	0.98
BIOCARTA_41BB_PATHWAY	0.5611119999999999	1.6052094	0.019267824	1.0	0.981
REACTOME_P2Y_RECEPTORS	0.7174285	1.6011783000000002	0.021653544	1.0	0.982
REACTOME_ADENYLATE_CYCLASE_ACTIVATING_PATHWAY	0.7395352	1.5937921999999998	0.01048218	1.0	0.985
BIOCARTA_IL1R_PATHWAY	0.53371704	1.6582416000000002	0.009541985	1.0	0.929
BIOCARTA_TOLL_PATHWAY	0.53568655	1.59104	0.019455252	1.0	0.985
BIOCARTA_CCR5_PATHWAY	0.73132616	1.5520693	0.034615386	1.0	0.996
BIOCARTA_PAR1_PATHWAY	0.47281885	1.5795003	0.030303031	1.0	0.9940000000000001
REACTOME_GAP_JUNCTION_TRAFFICKING	0.53158253	1.5685514999999999	0.060784314000000006	1.0	0.995
KEGG_TYPE_II_DIABETES_MELLITUS	0.4791745	1.5571868	0.028806584	1.0	0.996
KEGG_DNA_REPLICATION	-0.7793045999999999	-1.7204328999999998	0.005836576	1.0	0.7879999999999999
BIOCARTA_INSULIN_PATHWAY	0.5792415	1.5510443	0.013888889	1.0	0.997
BIOCARTA_ARENRF2_PATHWAY	0.6638651	1.5509516	0.018218623	1.0	0.997
REACTOME_PROSTANOID_LIGAND_RECEPTORS	0.71349156	1.5398935	0.032719836	1.0	0.998
REACTOME_NOREPINEPHRINE_NEUROTRANSMITTER_RELEASE_CYCLE	0.23334017	0.44782758	0.9958763	1.0	1.0
REACTOME_CALNEXIN_CALRETICULIN_CYCLE	0.18538410000000002	0.44647780000000004	0.98630136	1.0	1.0
REACTOME_GLUCURONIDATION	0.26211932	0.42703986	1.0	1.0	1.0
BIOCARTA_NOS1_PATHWAY	0.14774556	0.42478004	0.9979036	1.0	1.0
REACTOME_GLYCOSPHINGOLIPID_METABOLISM	0.14099053	0.41204408	0.9980276	1.0	1.0
BIOCARTA_LECTIN_PATHWAY	0.73278797	1.5870016000000002	0.019455252	1.0	0.986
BIOCARTA_STRESS_PATHWAY	0.59071356	1.8079085	0.0	1.0	0.475
